# Supplementary material for: Metagenomic investigation of the equine faecal microbiome reveals extensive taxonomic diversity
Source: PeerJ. 2022 Mar 23;10:e13084. doi: 10.7717/peerj.13084 (PMC8957277; doi:10.7717/peerj.13084)
Supplement: Supplemental Information 1 — Table S1. Sequence Summaries. Summaries of sequencing data from 5 metagenomic samples sourced from equine faeces from BioProject PRJNA590977 Table S2. Read-based taxonomic analysis. Bracken read based relative abundance values for 5 equine faecal samples from BioProject PRJNA590977. Table S3. Metagenome Assembled Genome statistics. CheckM genome statistics for MAG catalogue following assembly of metagenomic reads from 5 horse faecal samples. For High and medium quality sequences, clusters at 95% and 99% ANI have been detailed.Table S4. tRNA presence in high and medium quality MAGs. tRNA presence across MAG catalogue following assembly of metagenomic reads from 5 horse faecal samples. Table S5. MAG taxonomic assignments. Taxonomic analysis for de-replicated MAG species clusters (95% ANI) according to GTDB (release 202), CAT/BAT (NCBI nr database) and ReferenceSeeker (RefSeq database). Newly assigned Latin binomials have been provided where appropriate. Table S6. AAI analysis for novel genera. Average amino acid identity (AAI) scores for all genomes of novel genera as determined by CompareM. Table S7. Distribution analysis of recovered MAGs. Coverage statistics for 110 MAG species clusters (95% ANI) recovered from 5 metagenomic samples derived from equine faeces. Relative abundance of all MAG species clusters across samples have been provided. Table S8. Functional annotation of recovered MAGs. Presence of genes associated with CAZyme function across 123 MAGs recovered from metagenomic reads of 5 horse faecal samples. Table S9. Genome and quality analysis of with recovered phage sequences. CheckV summary statistics of all VirSorter Category 1 and Category 2 phages >5 kb in length derived from metagenomic assemblies of horse faecal samples. For all High and medium quality phage sequences, further detail of taxonomic annotation and sequences coverage have been provided. Table S10. Protein based clustering of high quality or complete phage sequences. vCONTACT2 output for [file peerj-10-13084-s001.xlsx]

## Sheet: S1Table
S1 Table. Sequence Summaries. Summaries of sequencing data from 5 metagenomic samples sourced from equine faeces from BioProject PRJNA590977
Sample ID	BioSample	BioProject	Read pairs	GC	min read length	max read length	host alignment [%]	Host filtered read pairs	Overall read alignment [%]	contigs >1,000bp	min length	max length	Total length	N50	Num genes [prodigal]	Bins below quality threshold	Bins passing quality threshold			Total bins	Read pairs mapping to dereplicated species	% of reads mapping to dereplicated species
																	Low quality bins	Medium quality bins	High quality bins
E1	SAMN13344078	PRJNA590977	54015452	44	36	151	0.370685	53815225	81.67	190495	1000	253048	471556000	2821	563241	9	2	11	12	34	10721215	0.198484
E2	SAMN13344079	PRJNA590977	60204732	45	36	151	0.354017	59991597	80.3	152764	1000	234420	330607108	2259	418897	8	2	10	3	23	7115803	0.118193
E3	SAMN13344080	PRJNA590977	59379257	48	36	151	0.299739	59201274	77.37	247756	1000	274613	598361220	2696	714609	11	7	17	9	44	9786224	0.164809
E4	SAMN13344081	PRJNA590977	57844346	41	36	151	0.269956	57688192	85.93	177923	1000	262397	527303021	4000	600811	9	11	20	19	59	13985283	0.241774
E5	SAMN13344082	PRJNA590977	53446252	48	36	151	0.215482	53331085	73.46	217519	1000	471467	516984456	2621	607276	7	6	11	12	36	8818265	0.164993

## Sheet: S2 Table
S2 Table. Read-based taxonomic analysis. Bracken read based relative abundance values for 5 equine faecal samples from BioProject PRJNA590977.
name	taxRank	taxID	Max		E1		E2		E3		E4		E5		lineage
			Reads	%	Reads	%	Reads	%	Reads	%	Reads	%	Reads	%
Acinetobacter sp. CS-2	S	2798861	2101200	9.46	648202	4.283	2101242	9.46	NA	NA	NA	NA	NA	NA	cellular&nbsp;organisms>Bacteria>Proteobacteria>Gammaproteobacteria>Pseudomonadales>Moraxellaceae>Acinetobacter>unclassified&nbsp;Acinetobacter
Acinetobacter lanii	S	2715163	1428200	9.436	1428183	9.436	1129744	5.086	247986	3.053	258153	2.92	47503	0.648	cellular&nbsp;organisms>Bacteria>Proteobacteria>Gammaproteobacteria>Pseudomonadales>Moraxellaceae>Acinetobacter
Acinetobacter wanghuae	S	2662362	1351800	6.086	902540	5.963	1351799	6.086	1559	0.0192	6474	0.07322	2809	0.03832	cellular&nbsp;organisms>Bacteria>Proteobacteria>Gammaproteobacteria>Pseudomonadales>Moraxellaceae>Acinetobacter
Paenibacillus larvae	S	1464	447310	5.939	144877	0.9572	NA	NA	447312	5.508	300601	3.4	435309	5.939	cellular&nbsp;organisms>Bacteria>Terrabacteria&nbsp;group>Firmicutes>Bacilli>Bacillales>Paenibacillaceae>Paenibacillus
Acinetobacter sp. TTH0-4	S	1646498	1087500	4.896	340105	2.247	1087489	4.896	NA	NA	NA	NA	NA	NA	cellular&nbsp;organisms>Bacteria>Proteobacteria>Gammaproteobacteria>Pseudomonadales>Moraxellaceae>Acinetobacter>unclassified&nbsp;Acinetobacter
Streptococcus equinus	S	1335	717480	4.741	717484	4.741	3513	0.01582	3883	0.04781	8249	0.09329	3708	0.05059	cellular&nbsp;organisms>Bacteria>Terrabacteria&nbsp;group>Firmicutes>Bacilli>Lactobacillales>Streptococcaceae>Streptococcus
Acinetobacter lwoffii	S	28090	798140	4.472	676854	4.472	798139	3.593	3412	0.04201	6644	0.07514	NA	NA	cellular&nbsp;organisms>Bacteria>Proteobacteria>Gammaproteobacteria>Pseudomonadales>Moraxellaceae>Acinetobacter
Lysinibacillus sp. 2017	S	2169540	640130	4.229	640128	4.229	364248	1.64	2490	0.03066	2059	0.02329	1553	0.02119	cellular&nbsp;organisms>Bacteria>Terrabacteria&nbsp;group>Firmicutes>Bacilli>Bacillales>Bacillaceae>Lysinibacillus>unclassified&nbsp;Lysinibacillus
Acinetobacter baumannii	S	470	790750	3.56	263529	1.741	790747	3.56	17986	0.2215	31944	0.3613	16107	0.2197	cellular&nbsp;organisms>Bacteria>Proteobacteria>Gammaproteobacteria>Pseudomonadales>Moraxellaceae>Acinetobacter>Acinetobacter&nbsp;calcoaceticus/baumannii&nbsp;complex
Acinetobacter johnsonii	S	40214	642830	2.894	190630	1.26	642834	2.894	4473	0.05507	8696	0.09835	2614	0.03566	cellular&nbsp;organisms>Bacteria>Proteobacteria>Gammaproteobacteria>Pseudomonadales>Moraxellaceae>Acinetobacter
Pseudomonas lundensis	S	86185	619470	2.789	177458	1.173	619468	2.789	3749	0.04616	11442	0.1294	NA	NA	cellular&nbsp;organisms>Bacteria>Proteobacteria>Gammaproteobacteria>Pseudomonadales>Pseudomonadaceae>Pseudomonas>Pseudomonas&nbsp;chlororaphis&nbsp;group
Acinetobacter indicus	S	756892	608550	2.74	220847	1.459	608548	2.74	5329	0.06561	6323	0.07151	2598	0.03544	cellular&nbsp;organisms>Bacteria>Proteobacteria>Gammaproteobacteria>Pseudomonadales>Moraxellaceae>Acinetobacter
Fibrobacter succinogenes	S	833	169050	2.306	23315	0.154	3383	0.01523	16763	0.2064	6716	0.07595	169048	2.306	cellular&nbsp;organisms>Bacteria>FCB&nbsp;group>Fibrobacteres>Fibrobacteria>Fibrobacterales>Fibrobacteraceae>Fibrobacter
Butyrivibrio fibrisolvens	S	831	201160	2.275	21924	0.1449	11101	0.04998	23420	0.2884	201165	2.275	35774	0.488	cellular&nbsp;organisms>Bacteria>Terrabacteria&nbsp;group>Firmicutes>Clostridia>Eubacteriales>Lachnospiraceae>Butyrivibrio
Empedobacter falsenii	S	343874	300160	1.983	300163	1.983	293472	1.321	5004	0.06161	2135	0.02415	3375	0.04604	cellular&nbsp;organisms>Bacteria>FCB&nbsp;group>Bacteroidetes/Chlorobi&nbsp;group>Bacteroidetes>Flavobacteriia>Flavobacteriales>Weeksellaceae>Empedobacter
Empedobacter stercoris	S	1628248	271200	1.792	271198	1.792	247472	1.114	2956	0.0364	NA	NA	1547	0.0211	cellular&nbsp;organisms>Bacteria>FCB&nbsp;group>Bacteroidetes/Chlorobi&nbsp;group>Bacteroidetes>Flavobacteriia>Flavobacteriales>Weeksellaceae>Empedobacter
Acinetobacter schindleri	S	108981	374130	1.684	161780	1.069	374132	1.684	2566	0.03159	3802	0.043	1888	0.02576	cellular&nbsp;organisms>Bacteria>Proteobacteria>Gammaproteobacteria>Pseudomonadales>Moraxellaceae>Acinetobacter
Escherichia coli	S	562	201430	1.638	154043	1.018	201434	0.9069	133056	1.638	97211	1.099	39392	0.5374	cellular&nbsp;organisms>Bacteria>Proteobacteria>Gammaproteobacteria>Enterobacterales>Enterobacteriaceae>Escherichia
Empedobacter brevis	S	247	224260	1.482	224260	1.482	219910	0.99	4517	0.05562	3018	0.03413	3029	0.04132	cellular&nbsp;organisms>Bacteria>FCB&nbsp;group>Bacteroidetes/Chlorobi&nbsp;group>Bacteroidetes>Flavobacteriia>Flavobacteriales>Weeksellaceae>Empedobacter
Acinetobacter sp. TGL-Y2	S	1407071	299750	1.349	76463	0.5052	299750	1.349	NA	NA	1460	0.01651	NA	NA	cellular&nbsp;organisms>Bacteria>Proteobacteria>Gammaproteobacteria>Pseudomonadales>Moraxellaceae>Acinetobacter>unclassified&nbsp;Acinetobacter
Acinetobacter sp. YH12138	S	2601122	293990	1.324	86795	0.5735	293986	1.324	NA	NA	NA	NA	NA	NA	cellular&nbsp;organisms>Bacteria>Proteobacteria>Gammaproteobacteria>Pseudomonadales>Moraxellaceae>Acinetobacter>unclassified&nbsp;Acinetobacter
Roseburia intestinalis	S	166486	112760	1.275	12270	0.08107	7637	0.03438	13611	0.1676	112756	1.275	20980	0.2862	cellular&nbsp;organisms>Bacteria>Terrabacteria&nbsp;group>Firmicutes>Clostridia>Eubacteriales>Lachnospiraceae>Roseburia
Butyrivibrio hungatei	S	185008	104390	1.181	10859	0.07175	5646	0.02542	11593	0.1427	104386	1.181	17522	0.239	cellular&nbsp;organisms>Bacteria>Terrabacteria&nbsp;group>Firmicutes>Clostridia>Eubacteriales>Lachnospiraceae>Butyrivibrio
Pseudobutyrivibrio xylanivorans	S	185007	102240	1.156	10534	0.0696	5367	0.02416	10756	0.1324	102237	1.156	16898	0.2305	cellular&nbsp;organisms>Bacteria>Terrabacteria&nbsp;group>Firmicutes>Clostridia>Eubacteriales>Lachnospiraceae>Pseudobutyrivibrio
Butyrivibrio proteoclasticus	S	43305	101320	1.146	10442	0.06899	6097	0.02745	11798	0.1453	101321	1.146	17741	0.242	cellular&nbsp;organisms>Bacteria>Terrabacteria&nbsp;group>Firmicutes>Clostridia>Eubacteriales>Lachnospiraceae>Butyrivibrio
Acinetobacter shaoyimingii	S	2715164	254250	1.145	52352	0.3459	254250	1.145	1080	0.0133	1377	0.01557	1334	0.0182	cellular&nbsp;organisms>Bacteria>Proteobacteria>Gammaproteobacteria>Pseudomonadales>Moraxellaceae>Acinetobacter
Acinetobacter wuhouensis	S	1879050	253870	1.143	65968	0.4359	253874	1.143	NA	NA	3100	0.03506	NA	NA	cellular&nbsp;organisms>Bacteria>Proteobacteria>Gammaproteobacteria>Pseudomonadales>Moraxellaceae>Acinetobacter
Prevotella copri	S	165179	99591	1.126	44552	0.2944	8749	0.03939	57679	0.7102	99591	1.126	57160	0.7798	cellular&nbsp;organisms>Bacteria>FCB&nbsp;group>Bacteroidetes/Chlorobi&nbsp;group>Bacteroidetes>Bacteroidia>Bacteroidales>Prevotellaceae>Prevotella
Lachnospira eligens	S	39485	96594	1.092	10441	0.06899	5408	0.02435	11586	0.1427	96594	1.092	17370	0.237	cellular&nbsp;organisms>Bacteria>Terrabacteria&nbsp;group>Firmicutes>Clostridia>Eubacteriales>Lachnospiraceae>Lachnospira
Blautia sp. SC05B48	S	2479767	92527	1.046	13658	0.09024	8845	0.03982	16602	0.2044	92527	1.046	22234	0.3033	cellular&nbsp;organisms>Bacteria>Terrabacteria&nbsp;group>Firmicutes>Clostridia>Eubacteriales>Lachnospiraceae>Blautia>unclassified&nbsp;Blautia
Salmonella enterica	S	28901	74088	1.011	25464	0.1682	22247	0.1002	45865	0.5647	32654	0.3693	74088	1.011	cellular&nbsp;organisms>Bacteria>Proteobacteria>Gammaproteobacteria>Enterobacterales>Enterobacteriaceae>Salmonella
Acinetobacter towneri	S	202956	220000	0.9905	62203	0.411	220005	0.9905	NA	NA	NA	NA	NA	NA	cellular&nbsp;organisms>Bacteria>Proteobacteria>Gammaproteobacteria>Pseudomonadales>Moraxellaceae>Acinetobacter
Blautia obeum	S	40520	87047	0.9845	11061	0.07308	7153	0.0322	12746	0.1569	87047	0.9845	18093	0.2468	cellular&nbsp;organisms>Bacteria>Terrabacteria&nbsp;group>Firmicutes>Clostridia>Eubacteriales>Lachnospiraceae>Blautia
[Ruminococcus] torques	S	33039	85673	0.9689	11200	0.074	6568	0.02957	11967	0.1473	85673	0.9689	17551	0.2394	cellular&nbsp;organisms>Bacteria>Terrabacteria&nbsp;group>Firmicutes>Clostridia>Eubacteriales>Lachnospiraceae>Mediterraneibacter
Acinetobacter sp. NCu2D-2	S	1608473	212980	0.9588	84909	0.561	212980	0.9588	1393	0.01715	2153	0.02435	NA	NA	cellular&nbsp;organisms>Bacteria>Proteobacteria>Gammaproteobacteria>Pseudomonadales>Moraxellaceae>Acinetobacter>unclassified&nbsp;Acinetobacter
Starkeya novella	S	921	68201	0.9304	NA	NA	NA	NA	66607	0.8201	NA	NA	68201	0.9304	cellular&nbsp;organisms>Bacteria>Proteobacteria>Alphaproteobacteria>Hyphomicrobiales>Xanthobacteraceae>Starkeya
Acinetobacter sp. 10FS3-1	S	2563897	206260	0.9286	86663	0.5726	206264	0.9286	NA	NA	1725	0.01951	NA	NA	cellular&nbsp;organisms>Bacteria>Proteobacteria>Gammaproteobacteria>Pseudomonadales>Moraxellaceae>Acinetobacter>unclassified&nbsp;Acinetobacter
Acinetobacter cumulans	S	2136182	202310	0.9108	51877	0.3428	202314	0.9108	NA	NA	NA	NA	NA	NA	cellular&nbsp;organisms>Bacteria>Proteobacteria>Gammaproteobacteria>Pseudomonadales>Moraxellaceae>Acinetobacter
Anaerobutyricum hallii	S	39488	79916	0.9038	10507	0.06942	6661	0.02999	10639	0.131	79916	0.9038	16470	0.2247	cellular&nbsp;organisms>Bacteria>Terrabacteria&nbsp;group>Firmicutes>Clostridia>Eubacteriales>Lachnospiraceae>Anaerobutyricum
Streptococcus gallolyticus	S	315405	77755	0.8794	17483	0.1155	NA	NA	NA	NA	77755	0.8794	NA	NA	cellular&nbsp;organisms>Bacteria>Terrabacteria&nbsp;group>Firmicutes>Bacilli>Lactobacillales>Streptococcaceae>Streptococcus
Acinetobacter sp. LoGeW2-3	S	1808001	192340	0.8659	76062	0.5026	192344	0.8659	1837	0.02262	NA	NA	NA	NA	cellular&nbsp;organisms>Bacteria>Proteobacteria>Gammaproteobacteria>Pseudomonadales>Moraxellaceae>Acinetobacter>unclassified&nbsp;Acinetobacter
Coprococcus comes	S	410072	75365	0.8523	9189	0.06071	6508	0.0293	11070	0.1363	75365	0.8523	16289	0.2222	cellular&nbsp;organisms>Bacteria>Terrabacteria&nbsp;group>Firmicutes>Clostridia>Eubacteriales>Lachnospiraceae>Coprococcus
Faecalibacterium prausnitzii	S	853	61955	0.8452	30541	0.2018	31963	0.1439	50027	0.616	41122	0.4651	61955	0.8452	cellular&nbsp;organisms>Bacteria>Terrabacteria&nbsp;group>Firmicutes>Clostridia>Eubacteriales>Oscillospiraceae>Faecalibacterium
Anaerostipes hadrus	S	649756	74663	0.8444	9704	0.06412	6337	0.02853	13260	0.1633	74663	0.8444	16704	0.2279	cellular&nbsp;organisms>Bacteria>Terrabacteria&nbsp;group>Firmicutes>Clostridia>Eubacteriales>Lachnospiraceae>Anaerostipes
Prevotella ruminicola	S	839	72428	0.8191	36454	0.2409	6704	0.03018	40638	0.5004	72428	0.8191	40418	0.5514	cellular&nbsp;organisms>Bacteria>FCB&nbsp;group>Bacteroidetes/Chlorobi&nbsp;group>Bacteroidetes>Bacteroidia>Bacteroidales>Prevotellaceae>Prevotella
Roseburia hominis	S	301301	72165	0.8162	9754	0.06445	6560	0.02953	11964	0.1473	72165	0.8162	17222	0.2349	cellular&nbsp;organisms>Bacteria>Terrabacteria&nbsp;group>Firmicutes>Clostridia>Eubacteriales>Lachnospiraceae>Roseburia
Acinetobacter sp. ACNIH2	S	1758189	177720	0.8001	52174	0.3447	177715	0.8001	NA	NA	NA	NA	NA	NA	cellular&nbsp;organisms>Bacteria>Proteobacteria>Gammaproteobacteria>Pseudomonadales>Moraxellaceae>Acinetobacter>unclassified&nbsp;Acinetobacter
Blautia hansenii	S	1322	70127	0.7931	8181	0.05405	5174	0.02329	9716	0.1196	70127	0.7931	13883	0.1894	cellular&nbsp;organisms>Bacteria>Terrabacteria&nbsp;group>Firmicutes>Clostridia>Eubacteriales>Lachnospiraceae>Blautia
Clostridioides difficile	S	1496	56625	0.7725	23715	0.1567	23324	0.105	49125	0.6049	32279	0.3651	56625	0.7725	cellular&nbsp;organisms>Bacteria>Terrabacteria&nbsp;group>Firmicutes>Clostridia>Eubacteriales>Peptostreptococcaceae>Clostridioides
Blautia producta	S	33035	67705	0.7657	10970	0.07248	7946	0.03577	14253	0.1755	67705	0.7657	19476	0.2657	cellular&nbsp;organisms>Bacteria>Terrabacteria&nbsp;group>Firmicutes>Clostridia>Eubacteriales>Lachnospiraceae>Blautia
Acinetobacter sp. ACNIH1	S	1636603	165720	0.7461	62652	0.414	165721	0.7461	NA	NA	NA	NA	NA	NA	cellular&nbsp;organisms>Bacteria>Proteobacteria>Gammaproteobacteria>Pseudomonadales>Moraxellaceae>Acinetobacter>unclassified&nbsp;Acinetobacter
Acinetobacter piscicola	S	2006115	165520	0.7452	46835	0.3095	165518	0.7452	NA	NA	NA	NA	NA	NA	cellular&nbsp;organisms>Bacteria>Proteobacteria>Gammaproteobacteria>Pseudomonadales>Moraxellaceae>Acinetobacter
Acinetobacter sp. WCHAc010034	S	1879049	165410	0.7447	50654	0.3347	165413	0.7447	NA	NA	NA	NA	NA	NA	cellular&nbsp;organisms>Bacteria>Proteobacteria>Gammaproteobacteria>Pseudomonadales>Moraxellaceae>Acinetobacter>unclassified&nbsp;Acinetobacter
Acinetobacter equi	S	1324350	165230	0.7439	33568	0.2218	165228	0.7439	NA	NA	NA	NA	NA	NA	cellular&nbsp;organisms>Bacteria>Proteobacteria>Gammaproteobacteria>Pseudomonadales>Moraxellaceae>Acinetobacter
Weissella confusa	S	1583	111690	0.738	111691	0.738	NA	NA	NA	NA	1484	0.01678	NA	NA	cellular&nbsp;organisms>Bacteria>Terrabacteria&nbsp;group>Firmicutes>Bacilli>Lactobacillales>Lactobacillaceae>Weissella
Acinetobacter radioresistens	S	40216	160730	0.7236	49271	0.3255	160734	0.7236	1211	0.01491	1447	0.01636	1167	0.01592	cellular&nbsp;organisms>Bacteria>Proteobacteria>Gammaproteobacteria>Pseudomonadales>Moraxellaceae>Acinetobacter
Bacteroides fragilis	S	817	58375	0.7019	35111	0.232	13783	0.06205	57010	0.7019	58375	0.6602	49628	0.677	cellular&nbsp;organisms>Bacteria>FCB&nbsp;group>Bacteroidetes/Chlorobi&nbsp;group>Bacteroidetes>Bacteroidia>Bacteroidales>Bacteroidaceae>Bacteroides
Coprococcus sp. ART55/1	S	751585	60859	0.6883	8027	0.05304	4664	0.021	10596	0.1305	60859	0.6883	15398	0.2101	cellular&nbsp;organisms>Bacteria>Terrabacteria&nbsp;group>Firmicutes>Clostridia>Eubacteriales>Lachnospiraceae>Coprococcus>unclassified&nbsp;Coprococcus
Acinetobacter sp. FDAARGOS_724	S	2545797	152280	0.6856	57448	0.3796	152278	0.6856	NA	NA	NA	NA	NA	NA	cellular&nbsp;organisms>Bacteria>Proteobacteria>Gammaproteobacteria>Pseudomonadales>Moraxellaceae>Acinetobacter>unclassified&nbsp;Acinetobacter
Prevotella melaninogenica	S	28132	60568	0.685	27542	0.182	4414	0.01987	33369	0.4109	60568	0.685	31782	0.4336	cellular&nbsp;organisms>Bacteria>FCB&nbsp;group>Bacteroidetes/Chlorobi&nbsp;group>Bacteroidetes>Bacteroidia>Bacteroidales>Prevotellaceae>Prevotella
[Ruminococcus] gnavus	S	33038	60018	0.6788	7715	0.05097	5568	0.02507	9500	0.117	60018	0.6788	12748	0.1739	cellular&nbsp;organisms>Bacteria>Terrabacteria&nbsp;group>Firmicutes>Clostridia>Eubacteriales>Lachnospiraceae>Mediterraneibacter
Acinetobacter tandoii	S	202954	150440	0.6773	44827	0.2962	150445	0.6773	NA	NA	NA	NA	NA	NA	cellular&nbsp;organisms>Bacteria>Proteobacteria>Gammaproteobacteria>Pseudomonadales>Moraxellaceae>Acinetobacter
Acinetobacter pittii	S	48296	148800	0.6699	41228	0.2724	148796	0.6699	2569	0.03163	3270	0.03698	2467	0.03366	cellular&nbsp;organisms>Bacteria>Proteobacteria>Gammaproteobacteria>Pseudomonadales>Moraxellaceae>Acinetobacter>Acinetobacter&nbsp;calcoaceticus/baumannii&nbsp;complex
Sodaliphilus pleomorphus	S	2606626	53906	0.6637	21402	0.1414	16467	0.07413	53906	0.6637	25899	0.2929	41078	0.5604	cellular&nbsp;organisms>Bacteria>FCB&nbsp;group>Bacteroidetes/Chlorobi&nbsp;group>Bacteroidetes>Bacteroidia>Bacteroidales>Muribaculaceae>Sodaliphilus
Prevotella intermedia	S	28131	58392	0.6604	23823	0.1574	6966	0.03136	43527	0.5359	58392	0.6604	36862	0.5029	cellular&nbsp;organisms>Bacteria>FCB&nbsp;group>Bacteroidetes/Chlorobi&nbsp;group>Bacteroidetes>Bacteroidia>Bacteroidales>Prevotellaceae>Prevotella
Acinetobacter variabilis	S	70346	143940	0.648	64316	0.425	143942	0.648	NA	NA	NA	NA	NA	NA	cellular&nbsp;organisms>Bacteria>Proteobacteria>Gammaproteobacteria>Pseudomonadales>Moraxellaceae>Acinetobacter
Acinetobacter defluvii	S	1871111	139600	0.6285	37648	0.2487	139596	0.6285	NA	NA	NA	NA	NA	NA	cellular&nbsp;organisms>Bacteria>Proteobacteria>Gammaproteobacteria>Pseudomonadales>Moraxellaceae>Acinetobacter
Flavobacterium sp. I3-2	S	2748319	134860	0.6071	27988	0.1849	134861	0.6071	3974	0.04893	NA	NA	NA	NA	cellular&nbsp;organisms>Bacteria>FCB&nbsp;group>Bacteroidetes/Chlorobi&nbsp;group>Bacteroidetes>Flavobacteriia>Flavobacteriales>Flavobacteriaceae>Flavobacterium>unclassified&nbsp;Flavobacterium
Pseudomonas aeruginosa	S	287	43088	0.5878	27515	0.1818	33660	0.1515	40721	0.5014	13657	0.1545	43088	0.5878	cellular&nbsp;organisms>Bacteria>Proteobacteria>Gammaproteobacteria>Pseudomonadales>Pseudomonadaceae>Pseudomonas>Pseudomonas&nbsp;aeruginosa&nbsp;group
Acinetobacter bereziniae	S	106648	128560	0.5788	33541	0.2216	128558	0.5788	1262	0.01554	2669	0.03019	NA	NA	cellular&nbsp;organisms>Bacteria>Proteobacteria>Gammaproteobacteria>Pseudomonadales>Moraxellaceae>Acinetobacter
Acinetobacter sp. NEB149	S	2725684	95690	0.5743	86913	0.5743	95690	0.4308	NA	NA	NA	NA	NA	NA	cellular&nbsp;organisms>Bacteria>Proteobacteria>Gammaproteobacteria>Pseudomonadales>Moraxellaceae>Acinetobacter>unclassified&nbsp;Acinetobacter
Acinetobacter ursingii	S	108980	127090	0.5721	39606	0.2617	127087	0.5721	NA	NA	NA	NA	NA	NA	cellular&nbsp;organisms>Bacteria>Proteobacteria>Gammaproteobacteria>Pseudomonadales>Moraxellaceae>Acinetobacter
Coprococcus catus	S	116085	50418	0.5702	6971	0.04606	4934	0.02221	9134	0.1125	50418	0.5702	12246	0.1671	cellular&nbsp;organisms>Bacteria>Terrabacteria&nbsp;group>Firmicutes>Clostridia>Eubacteriales>Lachnospiraceae>Coprococcus
Treponema succinifaciens	S	167	48156	0.5446	18483	0.1221	3915	0.01763	18391	0.2264	48156	0.5446	25905	0.3534	cellular&nbsp;organisms>Bacteria>Spirochaetes>Spirochaetia>Spirochaetales>Spirochaetaceae>Treponema
Acinetobacter haemolyticus	S	29430	117800	0.5303	34711	0.2293	117802	0.5303	1611	0.01984	1786	0.0202	NA	NA	cellular&nbsp;organisms>Bacteria>Proteobacteria>Gammaproteobacteria>Pseudomonadales>Moraxellaceae>Acinetobacter
Carnobacterium inhibens	S	147709	75203	0.4969	75203	0.4969	17102	0.07699	1554	0.01913	2084	0.02357	NA	NA	cellular&nbsp;organisms>Bacteria>Terrabacteria&nbsp;group>Firmicutes>Bacilli>Lactobacillales>Carnobacteriaceae>Carnobacterium
Kurthia sp. 11kri321	S	1750719	74744	0.4939	74744	0.4939	27355	0.1232	NA	NA	1326	0.015	NA	NA	cellular&nbsp;organisms>Bacteria>Terrabacteria&nbsp;group>Firmicutes>Bacilli>Bacillales>Planococcaceae>Kurthia>unclassified&nbsp;Kurthia
Lacrimispora saccharolytica	S	84030	43640	0.4935	9974	0.0659	8250	0.03714	14635	0.1802	43640	0.4935	18101	0.2469	cellular&nbsp;organisms>Bacteria>Terrabacteria&nbsp;group>Firmicutes>Clostridia>Eubacteriales>Lachnospiraceae>Lacrimispora
Acinetobacter baylyi	S	202950	108160	0.487	29488	0.1948	108165	0.487	NA	NA	NA	NA	NA	NA	cellular&nbsp;organisms>Bacteria>Proteobacteria>Gammaproteobacteria>Pseudomonadales>Moraxellaceae>Acinetobacter
Acinetobacter venetianus	S	52133	105370	0.4744	27245	0.18	105374	0.4744	NA	NA	NA	NA	NA	NA	cellular&nbsp;organisms>Bacteria>Proteobacteria>Gammaproteobacteria>Pseudomonadales>Moraxellaceae>Acinetobacter
Acinetobacter sp. Marseille-Q1620	S	2714110	101820	0.4584	27817	0.1838	101818	0.4584	NA	NA	1071	0.01211	NA	NA	cellular&nbsp;organisms>Bacteria>Proteobacteria>Gammaproteobacteria>Pseudomonadales>Moraxellaceae>Acinetobacter>unclassified&nbsp;Acinetobacter
Blautia argi	S	1912897	39700	0.449	5739	0.03792	4365	0.01965	7257	0.08935	39700	0.449	10076	0.1375	cellular&nbsp;organisms>Bacteria>Terrabacteria&nbsp;group>Firmicutes>Clostridia>Eubacteriales>Lachnospiraceae>Blautia
Clostridium botulinum	S	1491	39173	0.443	17807	0.1177	14886	0.06702	19359	0.2384	39173	0.443	16981	0.2317	cellular&nbsp;organisms>Bacteria>Terrabacteria&nbsp;group>Firmicutes>Clostridia>Eubacteriales>Clostridiaceae>Clostridium
Enterococcus faecium	S	1352	39017	0.4413	13097	0.08654	7664	0.0345	9966	0.1227	39017	0.4413	13123	0.179	cellular&nbsp;organisms>Bacteria>Terrabacteria&nbsp;group>Firmicutes>Bacilli>Lactobacillales>Enterococcaceae>Enterococcus
Lachnoclostridium phytofermentans	S	66219	38695	0.4376	5050	0.03337	2862	0.01288	6467	0.07963	38695	0.4376	7600	0.1037	cellular&nbsp;organisms>Bacteria>Terrabacteria&nbsp;group>Firmicutes>Clostridia>Eubacteriales>Lachnospiraceae>Lachnoclostridium
[Clostridium] scindens	S	29347	38466	0.435	5082	0.03358	3885	0.01749	7616	0.09377	38466	0.435	9144	0.1247	cellular&nbsp;organisms>Bacteria>Terrabacteria&nbsp;group>Firmicutes>Clostridia>Eubacteriales>Lachnospiraceae>Lachnoclostridium
Treponema ruminis	S	744515	37910	0.4287	21014	0.1388	3681	0.01657	12085	0.1488	37910	0.4287	20566	0.2806	cellular&nbsp;organisms>Bacteria>Spirochaetes>Spirochaetia>Spirochaetales>Spirochaetaceae>Treponema
Prevotella denticola	S	28129	37589	0.4251	16929	0.1119	6380	0.02872	30358	0.3738	37589	0.4251	22687	0.3095	cellular&nbsp;organisms>Bacteria>FCB&nbsp;group>Bacteroidetes/Chlorobi&nbsp;group>Bacteroidetes>Bacteroidia>Bacteroidales>Prevotellaceae>Prevotella
Treponema sp. RCC2812	S	2787628	36752	0.4156	15875	0.1049	3682	0.01658	12788	0.1575	36752	0.4156	18378	0.2507	cellular&nbsp;organisms>Bacteria>Spirochaetes>Spirochaetia>Spirochaetales>Spirochaetaceae>Treponema>unclassified&nbsp;Treponema
Acinetobacter seifertii	S	1530123	92147	0.4148	26746	0.1767	92147	0.4148	NA	NA	1363	0.01541	NA	NA	cellular&nbsp;organisms>Bacteria>Proteobacteria>Gammaproteobacteria>Pseudomonadales>Moraxellaceae>Acinetobacter>Acinetobacter&nbsp;calcoaceticus/baumannii&nbsp;complex
Paraprevotella xylaniphila	S	454155	33332	0.4135	18334	0.1211	5348	0.02408	33332	0.4104	29622	0.335	30307	0.4135	cellular&nbsp;organisms>Bacteria>FCB&nbsp;group>Bacteroidetes/Chlorobi&nbsp;group>Bacteroidetes>Bacteroidia>Bacteroidales>Prevotellaceae>Paraprevotella
Phocaeicola coprophilus	S	387090	33565	0.4133	18028	0.1191	5956	0.02681	33565	0.4133	27123	0.3067	29655	0.4046	cellular&nbsp;organisms>Bacteria>FCB&nbsp;group>Bacteroidetes/Chlorobi&nbsp;group>Bacteroidetes>Bacteroidia>Bacteroidales>Bacteroidales&nbsp;incertae&nbsp;sedis>Phocaeicola
Prevotella dentalis	S	52227	34589	0.4059	19409	0.1282	6347	0.02857	32969	0.4059	34589	0.3912	26644	0.3635	cellular&nbsp;organisms>Bacteria>FCB&nbsp;group>Bacteroidetes/Chlorobi&nbsp;group>Bacteroidetes>Bacteroidia>Bacteroidales>Prevotellaceae>Prevotella
Kurthia zopfii	S	1650	60698	0.401	60698	0.401	30855	0.1389	1441	0.01774	1939	0.02193	1788	0.02439	cellular&nbsp;organisms>Bacteria>Terrabacteria&nbsp;group>Firmicutes>Bacilli>Bacillales>Planococcaceae>Kurthia
Acinetobacter calcoaceticus	S	471	88816	0.3998	22919	0.1514	88816	0.3998	NA	NA	NA	NA	NA	NA	cellular&nbsp;organisms>Bacteria>Proteobacteria>Gammaproteobacteria>Pseudomonadales>Moraxellaceae>Acinetobacter>Acinetobacter&nbsp;calcoaceticus/baumannii&nbsp;complex
Bacillus cereus	S	1396	53002	0.3871	53002	0.3502	37802	0.1702	24146	0.2973	29418	0.3327	28373	0.3871	cellular&nbsp;organisms>Bacteria>Terrabacteria&nbsp;group>Firmicutes>Bacilli>Bacillales>Bacillaceae>Bacillus>Bacillus&nbsp;cereus&nbsp;group
Lachnoanaerobaculum umeaense	S	617123	33653	0.3806	5538	0.03659	3296	0.01484	7507	0.09243	33653	0.3806	10302	0.1405	cellular&nbsp;organisms>Bacteria>Terrabacteria&nbsp;group>Firmicutes>Clostridia>Eubacteriales>Lachnospiraceae>Lachnoanaerobaculum
Acinetobacter sp. WCHA55	S	2004646	82485	0.3713	24499	0.1619	82485	0.3713	NA	NA	NA	NA	NA	NA	cellular&nbsp;organisms>Bacteria>Proteobacteria>Gammaproteobacteria>Pseudomonadales>Moraxellaceae>Acinetobacter>unclassified&nbsp;Acinetobacter
Carnobacterium sp. 17-4	S	208596	54375	0.3593	54375	0.3593	15265	0.06872	2053	0.02528	3046	0.03445	NA	NA	cellular&nbsp;organisms>Bacteria>Terrabacteria&nbsp;group>Firmicutes>Bacilli>Lactobacillales>Carnobacteriaceae>Carnobacterium>unclassified&nbsp;Carnobacterium
Anaerocolumna cellulosilytica	S	433286	31721	0.3587	3191	0.02108	2576	0.0116	4212	0.05186	31721	0.3587	4920	0.06712	cellular&nbsp;organisms>Bacteria>Terrabacteria&nbsp;group>Firmicutes>Clostridia>Eubacteriales>Lachnospiraceae>Anaerocolumna
Acinetobacter junii	S	40215	77974	0.351	20042	0.1324	77974	0.351	NA	NA	1535	0.01736	NA	NA	cellular&nbsp;organisms>Bacteria>Proteobacteria>Gammaproteobacteria>Pseudomonadales>Moraxellaceae>Acinetobacter
Prevotella oris	S	28135	31014	0.3508	10439	0.06897	3164	0.01424	16946	0.2086	31014	0.3508	14944	0.2039	cellular&nbsp;organisms>Bacteria>FCB&nbsp;group>Bacteroidetes/Chlorobi&nbsp;group>Bacteroidetes>Bacteroidia>Bacteroidales>Prevotellaceae>Prevotella
Anaerocolumna sedimenticola	S	2696063	30619	0.3463	3865	0.02554	2584	0.01163	4634	0.05706	30619	0.3463	6037	0.08236	cellular&nbsp;organisms>Bacteria>Terrabacteria&nbsp;group>Firmicutes>Clostridia>Eubacteriales>Lachnospiraceae>Anaerocolumna
Alloprevotella sp. E39	S	2133944	27845	0.3428	13244	0.08751	3774	0.01699	27845	0.3428	21476	0.2429	23786	0.3245	cellular&nbsp;organisms>Bacteria>FCB&nbsp;group>Bacteroidetes/Chlorobi&nbsp;group>Bacteroidetes>Bacteroidia>Bacteroidales>Prevotellaceae>Alloprevotella>unclassified&nbsp;Alloprevotella
Acinetobacter sp. SWBY1	S	2079596	74176	0.3339	20647	0.1364	74176	0.3339	NA	NA	NA	NA	NA	NA	cellular&nbsp;organisms>Bacteria>Proteobacteria>Gammaproteobacteria>Pseudomonadales>Moraxellaceae>Acinetobacter>unclassified&nbsp;Acinetobacter
Hafnia alvei	S	569	73648	0.3316	NA	NA	73648	0.3316	NA	NA	1924	0.02176	NA	NA	cellular&nbsp;organisms>Bacteria>Proteobacteria>Gammaproteobacteria>Enterobacterales>Hafniaceae>Hafnia
Prevotella fusca	S	589436	28764	0.3253	11586	0.07655	3040	0.01369	16699	0.2056	28764	0.3253	14561	0.1986	cellular&nbsp;organisms>Bacteria>FCB&nbsp;group>Bacteroidetes/Chlorobi&nbsp;group>Bacteroidetes>Bacteroidia>Bacteroidales>Prevotellaceae>Prevotella
Muribaculum intestinale	S	1796646	26162	0.3221	13137	0.0868	6688	0.03011	26162	0.3221	13185	0.1491	18746	0.2557	cellular&nbsp;organisms>Bacteria>FCB&nbsp;group>Bacteroidetes/Chlorobi&nbsp;group>Bacteroidetes>Bacteroidia>Bacteroidales>Muribaculaceae>Muribaculum
Parabacteroides distasonis	S	823	26031	0.3205	15275	0.1009	6901	0.03107	26031	0.3205	20307	0.2297	19085	0.2604	cellular&nbsp;organisms>Bacteria>FCB&nbsp;group>Bacteroidetes/Chlorobi&nbsp;group>Bacteroidetes>Bacteroidia>Bacteroidales>Tannerellaceae>Parabacteroides
Acinetobacter nosocomialis	S	106654	71066	0.3199	23592	0.1559	71066	0.3199	NA	NA	2137	0.02417	NA	NA	cellular&nbsp;organisms>Bacteria>Proteobacteria>Gammaproteobacteria>Pseudomonadales>Moraxellaceae>Acinetobacter>Acinetobacter&nbsp;calcoaceticus/baumannii&nbsp;complex
Acinetobacter dispersus	S	70348	70547	0.3176	20319	0.1343	70547	0.3176	NA	NA	NA	NA	NA	NA	cellular&nbsp;organisms>Bacteria>Proteobacteria>Gammaproteobacteria>Pseudomonadales>Moraxellaceae>Acinetobacter
Bacteroides thetaiotaomicron	S	818	25587	0.3156	15795	0.1044	6463	0.0291	25587	0.315	23717	0.2682	23132	0.3156	cellular&nbsp;organisms>Bacteria>FCB&nbsp;group>Bacteroidetes/Chlorobi&nbsp;group>Bacteroidetes>Bacteroidia>Bacteroidales>Bacteroidaceae>Bacteroides
Clostridium novyi	S	1542	27618	0.3123	9822	0.0649	7385	0.03325	12124	0.1493	27618	0.3123	11627	0.1586	cellular&nbsp;organisms>Bacteria>Terrabacteria&nbsp;group>Firmicutes>Clostridia>Eubacteriales>Clostridiaceae>Clostridium
Muribaculum gordoncarteri	S	2530390	25233	0.3107	15094	0.09973	6174	0.0278	25233	0.3107	17958	0.2031	21846	0.298	cellular&nbsp;organisms>Bacteria>FCB&nbsp;group>Bacteroidetes/Chlorobi&nbsp;group>Bacteroidetes>Bacteroidia>Bacteroidales>Muribaculaceae>Muribaculum
Phascolarctobacterium sp. Marseille-Q4147	S	2823317	22626	0.3087	7325	0.0484	2896	0.01304	6631	0.08164	13664	0.1545	22626	0.3087	cellular&nbsp;organisms>Bacteria>Terrabacteria&nbsp;group>Firmicutes>Negativicutes>Acidaminococcales>Acidaminococcaceae>Phascolarctobacterium>unclassified&nbsp;Phascolarctobacterium
Streptomyces hygroscopicus	S	1912	25286	0.3049	NA	NA	25286	0.1138	21389	0.2634	NA	NA	22350	0.3049	cellular&nbsp;organisms>Bacteria>Terrabacteria&nbsp;group>Actinobacteria>Actinomycetia>Streptomycetales>Streptomycetaceae>Streptomyces
Phocaeicola salanitronis	S	376805	22270	0.3034	12837	0.08482	5029	0.02264	22219	0.2736	22270	0.2519	22240	0.3034	cellular&nbsp;organisms>Bacteria>FCB&nbsp;group>Bacteroidetes/Chlorobi&nbsp;group>Bacteroidetes>Bacteroidia>Bacteroidales>Bacteroidales&nbsp;incertae&nbsp;sedis>Phocaeicola
Barnesiella viscericola	S	397865	24081	0.2981	13104	0.08658	5916	0.02663	24081	0.2965	15172	0.1716	21854	0.2981	cellular&nbsp;organisms>Bacteria>FCB&nbsp;group>Bacteroidetes/Chlorobi&nbsp;group>Bacteroidetes>Bacteroidia>Bacteroidales>Barnesiellaceae>Barnesiella
Alistipes onderdonkii	S	328813	24119	0.297	12471	0.0824	8757	0.03942	24119	0.297	9596	0.1085	18047	0.2462	cellular&nbsp;organisms>Bacteria>FCB&nbsp;group>Bacteroidetes/Chlorobi&nbsp;group>Bacteroidetes>Bacteroidia>Bacteroidales>Rikenellaceae>Alistipes
Prevotella sp. WR041	S	2801997	26194	0.2962	10419	0.06884	3142	0.01415	14208	0.1749	26194	0.2962	12297	0.1678	cellular&nbsp;organisms>Bacteria>FCB&nbsp;group>Bacteroidetes/Chlorobi&nbsp;group>Bacteroidetes>Bacteroidia>Bacteroidales>Prevotellaceae>Prevotella>unclassified&nbsp;Prevotella
Acinetobacter sp. NEB 394	S	2743575	64465	0.2902	21516	0.1422	64465	0.2902	NA	NA	NA	NA	NA	NA	cellular&nbsp;organisms>Bacteria>Proteobacteria>Gammaproteobacteria>Pseudomonadales>Moraxellaceae>Acinetobacter>unclassified&nbsp;Acinetobacter
Faecalitalea cylindroides	S	39483	25384	0.2871	6606	0.04365	4596	0.02069	9239	0.1138	25384	0.2871	9701	0.1323	cellular&nbsp;organisms>Bacteria>Terrabacteria&nbsp;group>Firmicutes>Erysipelotrichia>Erysipelotrichales>Erysipelotrichaceae>Faecalitalea
Solibacillus silvestris	S	76853	45231	0.2867	43390	0.2867	45231	0.2036	NA	NA	1506	0.01703	NA	NA	cellular&nbsp;organisms>Bacteria>Terrabacteria&nbsp;group>Firmicutes>Bacilli>Bacillales>Planococcaceae>Solibacillus
Alistipes shahii	S	328814	23203	0.2857	11142	0.07362	8054	0.03626	23203	0.2857	6587	0.0745	19135	0.261	cellular&nbsp;organisms>Bacteria>FCB&nbsp;group>Bacteroidetes/Chlorobi&nbsp;group>Bacteroidetes>Bacteroidia>Bacteroidales>Rikenellaceae>Alistipes
Bacteroides uniformis	S	820	22681	0.2854	13910	0.09191	4273	0.01924	21302	0.2623	22681	0.2565	20919	0.2854	cellular&nbsp;organisms>Bacteria>FCB&nbsp;group>Bacteroidetes/Chlorobi&nbsp;group>Bacteroidetes>Bacteroidia>Bacteroidales>Bacteroidaceae>Bacteroides
Ligilactobacillus salivarius	S	1624	25154	0.2845	6534	0.04317	1981	0.008918	4442	0.05469	25154	0.2845	6051	0.08255	cellular&nbsp;organisms>Bacteria>Terrabacteria&nbsp;group>Firmicutes>Bacilli>Lactobacillales>Lactobacillaceae>Ligilactobacillus
Staphylococcus aureus	S	1280	27456	0.2818	27456	0.1814	16111	0.07253	16036	0.1974	17901	0.2025	20658	0.2818	cellular&nbsp;organisms>Bacteria>Terrabacteria&nbsp;group>Firmicutes>Bacilli>Bacillales>Staphylococcaceae>Staphylococcus
Acinetobacter gyllenbergii	S	134534	62484	0.2813	19112	0.1263	62484	0.2813	NA	NA	NA	NA	NA	NA	cellular&nbsp;organisms>Bacteria>Proteobacteria>Gammaproteobacteria>Pseudomonadales>Moraxellaceae>Acinetobacter
Anaerocolumna sp. CTTW	S	2736602	24853	0.2811	3718	0.02457	2802	0.01261	5333	0.06566	24853	0.2811	6194	0.0845	cellular&nbsp;organisms>Bacteria>Terrabacteria&nbsp;group>Firmicutes>Clostridia>Eubacteriales>Lachnospiraceae>Anaerocolumna>unclassified&nbsp;Anaerocolumna
Clostridium sp. SY8519	S	1042156	24764	0.2801	4497	0.02971	3629	0.01634	6990	0.08606	24764	0.2801	7959	0.1086	cellular&nbsp;organisms>Bacteria>Terrabacteria&nbsp;group>Firmicutes>Clostridia>Eubacteriales>Clostridiaceae>Clostridium>unclassified&nbsp;Clostridium
Prevotella enoeca	S	76123	24704	0.2794	7157	0.04729	2483	0.01118	13464	0.1658	24704	0.2794	10743	0.1466	cellular&nbsp;organisms>Bacteria>FCB&nbsp;group>Bacteroidetes/Chlorobi&nbsp;group>Bacteroidetes>Bacteroidia>Bacteroidales>Prevotellaceae>Prevotella
[Eubacterium] cellulosolvens	S	29322	24528	0.2774	5379	0.03554	4101	0.01846	6964	0.08574	24528	0.2774	8950	0.1221	cellular&nbsp;organisms>Bacteria>Terrabacteria&nbsp;group>Firmicutes>Clostridia>Eubacteriales>Eubacteriaceae>Eubacterium
Enterocloster clostridioformis	S	1531	24392	0.2759	5760	0.03806	3705	0.01668	6560	0.08077	24392	0.2759	8965	0.1223	cellular&nbsp;organisms>Bacteria>Terrabacteria&nbsp;group>Firmicutes>Clostridia>Eubacteriales>Lachnospiraceae>Enterocloster
Dysosmobacter welbionis	S	2093857	20060	0.2737	13035	0.08613	NA	NA	16705	0.2057	13998	0.1583	20060	0.2737	cellular&nbsp;organisms>Bacteria>Terrabacteria&nbsp;group>Firmicutes>Clostridia>Eubacteriales>Oscillospiraceae>Dysosmobacter
Acinetobacter sp. WCHAc010052	S	2004647	60280	0.2714	17860	0.118	60280	0.2714	NA	NA	NA	NA	NA	NA	cellular&nbsp;organisms>Bacteria>Proteobacteria>Gammaproteobacteria>Pseudomonadales>Moraxellaceae>Acinetobacter>unclassified&nbsp;Acinetobacter
Oscillibacter sp. NSJ-62	S	2763056	19717	0.269	12612	0.08333	12387	0.05577	15909	0.1959	13421	0.1518	19717	0.269	cellular&nbsp;organisms>Bacteria>Terrabacteria&nbsp;group>Firmicutes>Clostridia>Eubacteriales>Oscillospiraceae>Oscillibacter>unclassified&nbsp;Oscillibacter
Alistipes communis	S	2585118	21656	0.2666	9618	0.06355	6995	0.03149	21656	0.2666	5727	0.06477	17428	0.2378	cellular&nbsp;organisms>Bacteria>FCB&nbsp;group>Bacteroidetes/Chlorobi&nbsp;group>Bacteroidetes>Bacteroidia>Bacteroidales>Rikenellaceae>Alistipes
Prevotella scopos	S	589437	23420	0.2649	7583	0.0501	1993	0.008972	12545	0.1545	23420	0.2649	11182	0.1525	cellular&nbsp;organisms>Bacteria>FCB&nbsp;group>Bacteroidetes/Chlorobi&nbsp;group>Bacteroidetes>Bacteroidia>Bacteroidales>Prevotellaceae>Prevotella
Acinetobacter soli	S	487316	57156	0.2573	19322	0.1277	57156	0.2573	NA	NA	NA	NA	NA	NA	cellular&nbsp;organisms>Bacteria>Proteobacteria>Gammaproteobacteria>Pseudomonadales>Moraxellaceae>Acinetobacter
Bacteroides eggerthii	S	28111	20788	0.256	11784	0.07786	4334	0.01951	20788	0.256	20281	0.2294	16962	0.2314	cellular&nbsp;organisms>Bacteria>FCB&nbsp;group>Bacteroidetes/Chlorobi&nbsp;group>Bacteroidetes>Bacteroidia>Bacteroidales>Bacteroidaceae>Bacteroides
Lachnoclostridium phocaeense	S	1871021	22564	0.2552	6061	0.04005	5547	0.02497	10912	0.1344	22564	0.2552	12387	0.169	cellular&nbsp;organisms>Bacteria>Terrabacteria&nbsp;group>Firmicutes>Clostridia>Eubacteriales>Lachnospiraceae>Lachnoclostridium
Weeksella virosa	S	1014	39092	0.2536	38375	0.2536	39092	0.176	1617	0.01991	1431	0.01618	NA	NA	cellular&nbsp;organisms>Bacteria>FCB&nbsp;group>Bacteroidetes/Chlorobi&nbsp;group>Bacteroidetes>Flavobacteriia>Flavobacteriales>Weeksellaceae>Weeksella
Bibersteinia trehalosi	S	47735	22381	0.2531	NA	NA	20232	0.09108	NA	NA	22381	0.2531	NA	NA	cellular&nbsp;organisms>Bacteria>Proteobacteria>Gammaproteobacteria>Pasteurellales>Pasteurellaceae>Bibersteinia
Phocaeicola dorei	S	357276	20738	0.2528	13370	0.08834	5030	0.02264	20531	0.2528	20738	0.2345	16934	0.231	cellular&nbsp;organisms>Bacteria>FCB&nbsp;group>Bacteroidetes/Chlorobi&nbsp;group>Bacteroidetes>Bacteroidia>Bacteroidales>Bacteroidales&nbsp;incertae&nbsp;sedis>Phocaeicola
Yersinia rohdei	S	29485	56099	0.2526	NA	NA	56099	0.2526	NA	NA	NA	NA	NA	NA	cellular&nbsp;organisms>Bacteria>Proteobacteria>Gammaproteobacteria>Enterobacterales>Yersiniaceae>Yersinia
Duncaniella dubosii	S	2518971	20341	0.2505	10814	0.07145	5246	0.02362	20341	0.2505	14039	0.1588	17295	0.2359	cellular&nbsp;organisms>Bacteria>FCB&nbsp;group>Bacteroidetes/Chlorobi&nbsp;group>Bacteroidetes>Bacteroidia>Bacteroidales>Muribaculaceae>Duncaniella
Alistipes finegoldii	S	214856	20117	0.2477	10417	0.06883	6888	0.03101	20117	0.2477	5810	0.06571	17412	0.2375	cellular&nbsp;organisms>Bacteria>FCB&nbsp;group>Bacteroidetes/Chlorobi&nbsp;group>Bacteroidetes>Bacteroidia>Bacteroidales>Rikenellaceae>Alistipes
Rahnella aquatilis	S	34038	54933	0.2473	NA	NA	54933	0.2473	NA	NA	2206	0.02495	NA	NA	cellular&nbsp;organisms>Bacteria>Proteobacteria>Gammaproteobacteria>Enterobacterales>Yersiniaceae>Rahnella
Akkermansia muciniphila	S	239935	20016	0.2464	18817	0.1243	15266	0.06873	20016	0.2464	8633	0.09764	14056	0.1918	cellular&nbsp;organisms>Bacteria>PVC&nbsp;group>Verrucomicrobia>Verrucomicrobiae>Verrucomicrobiales>Akkermansiaceae>Akkermansia
Clostridium perfringens	S	1502	21679	0.2452	12531	0.0828	10816	0.04869	10189	0.1255	21679	0.2452	9179	0.1252	cellular&nbsp;organisms>Bacteria>Terrabacteria&nbsp;group>Firmicutes>Clostridia>Eubacteriales>Clostridiaceae>Clostridium
Bacillus thuringiensis	S	1428	26195	0.2449	22979	0.1518	26195	0.1179	19375	0.2386	19673	0.2225	17948	0.2449	cellular&nbsp;organisms>Bacteria>Terrabacteria&nbsp;group>Firmicutes>Bacilli>Bacillales>Bacillaceae>Bacillus>Bacillus&nbsp;cereus&nbsp;group
Pseudomonas putida	S	303	19853	0.2444	15235	0.1007	19572	0.08811	19853	0.2444	8145	0.09212	17122	0.2336	cellular&nbsp;organisms>Bacteria>Proteobacteria>Gammaproteobacteria>Pseudomonadales>Pseudomonadaceae>Pseudomonas>Pseudomonas&nbsp;putida&nbsp;group
Acinetobacter chinensis	S	2004650	53528	0.241	18145	0.1199	53528	0.241	NA	NA	NA	NA	NA	NA	cellular&nbsp;organisms>Bacteria>Proteobacteria>Gammaproteobacteria>Pseudomonadales>Moraxellaceae>Acinetobacter
Bacillus subtilis	S	1423	29228	0.2394	29228	0.1931	18658	0.084	15198	0.1871	21169	0.2394	15490	0.2113	cellular&nbsp;organisms>Bacteria>Terrabacteria&nbsp;group>Firmicutes>Bacilli>Bacillales>Bacillaceae>Bacillus>Bacillus&nbsp;subtilis&nbsp;group
Sorangium cellulosum	S	56	18618	0.2384	9524	0.06293	13376	0.06022	18618	0.2292	2366	0.02676	17477	0.2384	cellular&nbsp;organisms>Bacteria>Proteobacteria>delta/epsilon&nbsp;subdivisions>Deltaproteobacteria>Myxococcales>Sorangiineae>Polyangiaceae>Sorangium
Prevotella jejuni	S	1177574	20888	0.2362	7673	0.0507	1878	0.008455	10637	0.131	20888	0.2362	8978	0.1225	cellular&nbsp;organisms>Bacteria>FCB&nbsp;group>Bacteroidetes/Chlorobi&nbsp;group>Bacteroidetes>Bacteroidia>Bacteroidales>Prevotellaceae>Prevotella
Acinetobacter larvae	S	1789224	51638	0.2325	13995	0.09247	51638	0.2325	NA	NA	NA	NA	NA	NA	cellular&nbsp;organisms>Bacteria>Proteobacteria>Gammaproteobacteria>Pseudomonadales>Moraxellaceae>Acinetobacter
Acinetobacter sp. MYb10	S	1827285	51554	0.2321	15919	0.1052	51554	0.2321	NA	NA	1465	0.01657	NA	NA	cellular&nbsp;organisms>Bacteria>Proteobacteria>Gammaproteobacteria>Pseudomonadales>Moraxellaceae>Acinetobacter>unclassified&nbsp;Acinetobacter
Solibacillus sp. R5-41	S	2048654	34566	0.2284	34566	0.2284	30358	0.1367	1313	0.01617	2100	0.02375	NA	NA	cellular&nbsp;organisms>Bacteria>Terrabacteria&nbsp;group>Firmicutes>Bacilli>Bacillales>Planococcaceae>Solibacillus>unclassified&nbsp;Solibacillus
Herbinix luporum	S	1679721	19738	0.2232	3113	0.02057	2359	0.01062	4314	0.05312	19738	0.2232	4989	0.06806	cellular&nbsp;organisms>Bacteria>Terrabacteria&nbsp;group>Firmicutes>Clostridia>Eubacteriales>Lachnospiraceae>Herbinix
Enterocloster bolteae	S	208479	19532	0.2209	6289	0.04155	7658	0.03448	11162	0.1374	19532	0.2209	12044	0.1643	cellular&nbsp;organisms>Bacteria>Terrabacteria&nbsp;group>Firmicutes>Clostridia>Eubacteriales>Lachnospiraceae>Enterocloster
Pseudomonas fluorescens	S	294	24337	0.2186	19140	0.1265	24337	0.1096	17755	0.2186	7760	0.08776	13498	0.1841	cellular&nbsp;organisms>Bacteria>Proteobacteria>Gammaproteobacteria>Pseudomonadales>Pseudomonadaceae>Pseudomonas>Pseudomonas&nbsp;fluorescens&nbsp;group
Alistipes megaguti	S	2364787	17728	0.2183	9357	0.06182	5841	0.0263	17728	0.2183	6189	0.06999	14044	0.1916	cellular&nbsp;organisms>Bacteria>FCB&nbsp;group>Bacteroidetes/Chlorobi&nbsp;group>Bacteroidetes>Bacteroidia>Bacteroidales>Rikenellaceae>Alistipes
Priestia megaterium	S	1404	19295	0.2182	16784	0.1109	12133	0.05462	10510	0.1294	19295	0.2182	10596	0.1446	cellular&nbsp;organisms>Bacteria>Terrabacteria&nbsp;group>Firmicutes>Bacilli>Bacillales>Bacillaceae>Priestia
Bacteroides xylanisolvens	S	371601	18809	0.2167	12029	0.07948	4911	0.02211	17600	0.2167	18809	0.2127	13599	0.1855	cellular&nbsp;organisms>Bacteria>FCB&nbsp;group>Bacteroidetes/Chlorobi&nbsp;group>Bacteroidetes>Bacteroidia>Bacteroidales>Bacteroidaceae>Bacteroides
Blautia sp. LZLJ-3	S	2779518	19149	0.2166	2973	0.01964	2861	0.01288	3705	0.04562	19149	0.2166	5104	0.06963	cellular&nbsp;organisms>Bacteria>Terrabacteria&nbsp;group>Firmicutes>Clostridia>Eubacteriales>Lachnospiraceae>Blautia>unclassified&nbsp;Blautia
Bacteroides ovatus	S	28116	19030	0.2152	11212	0.07408	5459	0.02458	15229	0.1875	19030	0.2152	11015	0.1503	cellular&nbsp;organisms>Bacteria>FCB&nbsp;group>Bacteroidetes/Chlorobi&nbsp;group>Bacteroidetes>Bacteroidia>Bacteroidales>Bacteroidaceae>Bacteroides
Flintibacter sp. KGMB00164	S	2610895	15749	0.2149	9044	0.05976	8225	0.03703	12478	0.1536	10601	0.1199	15749	0.2149	cellular&nbsp;organisms>Bacteria>Terrabacteria&nbsp;group>Firmicutes>Clostridia>Eubacteriales>Eubacteriales&nbsp;incertae&nbsp;sedis>Flintibacter>unclassified&nbsp;Flintibacter
Porphyromonas gingivalis	S	837	16827	0.2072	7997	0.05284	3944	0.01776	16827	0.2072	9810	0.1109	10885	0.1485	cellular&nbsp;organisms>Bacteria>FCB&nbsp;group>Bacteroidetes/Chlorobi&nbsp;group>Bacteroidetes>Bacteroidia>Bacteroidales>Porphyromonadaceae>Porphyromonas
Lacrimispora sphenoides	S	29370	17884	0.2023	3443	0.02275	2797	0.01259	4933	0.06074	17884	0.2023	6005	0.08192	cellular&nbsp;organisms>Bacteria>Terrabacteria&nbsp;group>Firmicutes>Clostridia>Eubacteriales>Lachnospiraceae>Lacrimispora
Bacteroides zoogleoformans	S	28119	16274	0.2021	8915	0.0589	3749	0.01688	16274	0.2004	14950	0.1691	14816	0.2021	cellular&nbsp;organisms>Bacteria>FCB&nbsp;group>Bacteroidetes/Chlorobi&nbsp;group>Bacteroidetes>Bacteroidia>Bacteroidales>Bacteroidaceae>Bacteroides
Klebsiella pneumoniae	S	573	15616	0.2009	7788	0.05146	8538	0.03844	15616	0.1923	11122	0.1258	14726	0.2009	cellular&nbsp;organisms>Bacteria>Proteobacteria>Gammaproteobacteria>Enterobacterales>Enterobacteriaceae>Klebsiella
Bacteroides heparinolyticus	S	28113	15846	0.1951	9743	0.06437	3447	0.01552	15846	0.1951	12678	0.1434	14039	0.1915	cellular&nbsp;organisms>Bacteria>FCB&nbsp;group>Bacteroidetes/Chlorobi&nbsp;group>Bacteroidetes>Bacteroidia>Bacteroidales>Bacteroidaceae>Bacteroides
Stenotrophomonas maltophilia	S	40324	15187	0.1938	10195	0.06736	11378	0.05122	15187	0.187	5957	0.06737	14205	0.1938	cellular&nbsp;organisms>Bacteria>Proteobacteria>Gammaproteobacteria>Xanthomonadales>Xanthomonadaceae>Stenotrophomonas>Stenotrophomonas&nbsp;maltophilia&nbsp;group
Phocaeicola vulgatus	S	821	15634	0.1925	9267	0.06123	3370	0.01517	15634	0.1925	12463	0.141	13291	0.1813	cellular&nbsp;organisms>Bacteria>FCB&nbsp;group>Bacteroidetes/Chlorobi&nbsp;group>Bacteroidetes>Bacteroidia>Bacteroidales>Bacteroidales&nbsp;incertae&nbsp;sedis>Phocaeicola
Flavonifractor plautii	S	292800	14114	0.1925	8610	0.05689	9098	0.04096	12066	0.1486	8890	0.1005	14114	0.1925	cellular&nbsp;organisms>Bacteria>Terrabacteria&nbsp;group>Firmicutes>Clostridia>Eubacteriales>Oscillospiraceae>Flavonifractor
Paenibacillus polymyxa	S	1406	16961	0.1918	10791	0.0713	11783	0.05305	12498	0.1539	16961	0.1918	13763	0.1878	cellular&nbsp;organisms>Bacteria>Terrabacteria&nbsp;group>Firmicutes>Bacilli>Bacillales>Paenibacillaceae>Paenibacillus
Amedibacterium intestinale	S	2583452	16719	0.1891	6004	0.03967	4999	0.02251	11691	0.1439	16719	0.1891	10312	0.1407	cellular&nbsp;organisms>Bacteria>Terrabacteria&nbsp;group>Firmicutes>Erysipelotrichia>Erysipelotrichales>Erysipelotrichaceae>Amedibacterium
Clostridium beijerinckii	S	1520	16662	0.1884	12590	0.08319	10171	0.04579	9880	0.1216	16662	0.1884	7458	0.1017	cellular&nbsp;organisms>Bacteria>Terrabacteria&nbsp;group>Firmicutes>Clostridia>Eubacteriales>Clostridiaceae>Clostridium
Streptococcus suis	S	1307	16652	0.1883	11348	0.07498	5080	0.02287	7084	0.08722	16652	0.1883	7156	0.09762	cellular&nbsp;organisms>Bacteria>Terrabacteria&nbsp;group>Firmicutes>Bacilli>Lactobacillales>Streptococcaceae>Streptococcus
Massilistercora timonensis	S	2086584	16571	0.1874	5404	0.03571	5539	0.02494	10089	0.1242	16571	0.1874	11337	0.1547	cellular&nbsp;organisms>Bacteria>Terrabacteria&nbsp;group>Firmicutes>Clostridia>Eubacteriales>Eubacteriales&nbsp;incertae&nbsp;sedis>Massilistercora
Alistipes dispar	S	2585119	15000	0.1847	7036	0.04649	5371	0.02418	15000	0.1847	4531	0.05124	12785	0.1744	cellular&nbsp;organisms>Bacteria>FCB&nbsp;group>Bacteroidetes/Chlorobi&nbsp;group>Bacteroidetes>Bacteroidia>Bacteroidales>Rikenellaceae>Alistipes
Streptomyces venezuelae	S	54571	19255	0.1839	19255	0.1272	10643	0.04791	13814	0.1701	16264	0.1839	12437	0.1697	cellular&nbsp;organisms>Bacteria>Terrabacteria&nbsp;group>Actinobacteria>Actinomycetia>Streptomycetales>Streptomycetaceae>Streptomyces
Hungatella hathewayi	S	154046	16019	0.1812	4112	0.02717	3795	0.01709	6196	0.07629	16019	0.1812	7040	0.09604	cellular&nbsp;organisms>Bacteria>Terrabacteria&nbsp;group>Firmicutes>Clostridia>Eubacteriales>Clostridiaceae>Hungatella
Cellulosilyticum sp. WCF-2	S	2497860	15945	0.1803	4063	0.02685	NA	NA	NA	NA	15945	0.1803	2982	0.04068	cellular&nbsp;organisms>Bacteria>Terrabacteria&nbsp;group>Firmicutes>Clostridia>Eubacteriales>Lachnospiraceae>Cellulosilyticum>unclassified&nbsp;Cellulosilyticum
Lachnoclostridium sp. YL32	S	1834196	15791	0.1786	3978	0.02628	3343	0.01505	5894	0.07257	15791	0.1786	7037	0.096	cellular&nbsp;organisms>Bacteria>Terrabacteria&nbsp;group>Firmicutes>Clostridia>Eubacteriales>Lachnospiraceae>Lachnoclostridium>unclassified&nbsp;Lachnoclostridium
Prevotella sp. oral taxon 299	S	652716	15725	0.1778	5162	0.03411	1428	0.006429	8276	0.1019	15725	0.1778	6708	0.09151	cellular&nbsp;organisms>Bacteria>FCB&nbsp;group>Bacteroidetes/Chlorobi&nbsp;group>Bacteroidetes>Bacteroidia>Bacteroidales>Prevotellaceae>Prevotella>unclassified&nbsp;Prevotella
Citrobacter freundii	S	546	12660	0.1727	6982	0.04613	10978	0.04942	12102	0.149	8333	0.09424	12660	0.1727	cellular&nbsp;organisms>Bacteria>Proteobacteria>Gammaproteobacteria>Enterobacterales>Enterobacteriaceae>Citrobacter>Citrobacter&nbsp;freundii&nbsp;complex
Clostridium butyricum	S	1492	15022	0.1699	6313	0.04171	6549	0.02948	6154	0.07577	15022	0.1699	5591	0.07627	cellular&nbsp;organisms>Bacteria>Terrabacteria&nbsp;group>Firmicutes>Clostridia>Eubacteriales>Clostridiaceae>Clostridium
Parabacteroides goldsteinii	S	328812	13793	0.1698	8823	0.0583	4036	0.01817	13793	0.1698	11022	0.1247	10576	0.1443	cellular&nbsp;organisms>Bacteria>FCB&nbsp;group>Bacteroidetes/Chlorobi&nbsp;group>Bacteroidetes>Bacteroidia>Bacteroidales>Tannerellaceae>Parabacteroides
Streptococcus dysgalactiae	S	1334	12441	0.1697	6656	0.04398	NA	NA	9881	0.1217	5917	0.06692	12441	0.1697	cellular&nbsp;organisms>Bacteria>Terrabacteria&nbsp;group>Firmicutes>Bacilli>Lactobacillales>Streptococcaceae>Streptococcus>Streptococcus&nbsp;dysgalactiae&nbsp;group
Acinetobacter guillouiae	S	106649	37460	0.1686	9672	0.06391	37460	0.1686	NA	NA	1550	0.01753	NA	NA	cellular&nbsp;organisms>Bacteria>Proteobacteria>Gammaproteobacteria>Pseudomonadales>Moraxellaceae>Acinetobacter
Anaerostipes rhamnosivorans	S	1229621	14677	0.166	3093	0.02044	2362	0.01063	4412	0.05432	14677	0.166	5838	0.07964	cellular&nbsp;organisms>Bacteria>Terrabacteria&nbsp;group>Firmicutes>Clostridia>Eubacteriales>Lachnospiraceae>Anaerostipes
Ruminococcus sp. JE7A12	S	2564099	14666	0.1659	6420	0.04242	3902	0.01757	10766	0.1326	14666	0.1659	11273	0.1538	cellular&nbsp;organisms>Bacteria>Terrabacteria&nbsp;group>Firmicutes>Clostridia>Eubacteriales>Oscillospiraceae>Ruminococcus>unclassified&nbsp;Ruminococcus
Comamonas aquatica	S	225991	36762	0.1655	8408	0.05555	36762	0.1655	NA	NA	NA	NA	NA	NA	cellular&nbsp;organisms>Bacteria>Proteobacteria>Betaproteobacteria>Burkholderiales>Comamonadaceae>Comamonas
Pasteurella multocida	S	747	14602	0.1651	3379	0.02233	5249	0.02363	6432	0.07919	14602	0.1651	6579	0.08975	cellular&nbsp;organisms>Bacteria>Proteobacteria>Gammaproteobacteria>Pasteurellales>Pasteurellaceae>Pasteurella
Eubacterium sp. NSJ-61	S	2764325	14380	0.1626	4888	0.0323	3865	0.0174	7866	0.09685	14380	0.1626	7840	0.107	cellular&nbsp;organisms>Bacteria>Terrabacteria&nbsp;group>Firmicutes>Clostridia>Eubacteriales>Eubacteriaceae>Eubacterium>unclassified&nbsp;Eubacterium
Rhizobium leguminosarum	S	384	11893	0.1622	10506	0.06942	9905	0.04459	10484	0.1291	7247	0.08196	11893	0.1622	cellular&nbsp;organisms>Bacteria>Proteobacteria>Alphaproteobacteria>Hyphomicrobiales>Rhizobiaceae>Rhizobium/Agrobacterium&nbsp;group>Rhizobium
Tannerella sp. oral taxon HOT-286	S	712710	12792	0.162	6303	0.04165	3488	0.0157	12792	0.1575	6221	0.07036	11875	0.162	cellular&nbsp;organisms>Bacteria>FCB&nbsp;group>Bacteroidetes/Chlorobi&nbsp;group>Bacteroidetes>Bacteroidia>Bacteroidales>Tannerellaceae>Tannerella>unclassified&nbsp;Tannerella
Akkermansia glycaniphila	S	1679444	13144	0.1618	10887	0.07193	9193	0.04139	13144	0.1618	5680	0.06424	8498	0.1159	cellular&nbsp;organisms>Bacteria>PVC&nbsp;group>Verrucomicrobia>Verrucomicrobiae>Verrucomicrobiales>Akkermansiaceae>Akkermansia
Mesorhizobium sp. M1B.F.Ca.ET.045.04.1.1	S	2493673	11813	0.1612	NA	NA	8744	0.03937	2925	0.03601	NA	NA	11813	0.1612	cellular&nbsp;organisms>Bacteria>Proteobacteria>Alphaproteobacteria>Hyphomicrobiales>Phyllobacteriaceae>Mesorhizobium>unclassified&nbsp;Mesorhizobium
Oscillibacter valericigenes	S	351091	11803	0.161	7178	0.04743	6872	0.03094	9395	0.1157	7999	0.09046	11803	0.161	cellular&nbsp;organisms>Bacteria>Terrabacteria&nbsp;group>Firmicutes>Clostridia>Eubacteriales>Oscillospiraceae>Oscillibacter
Bacteroides helcogenes	S	290053	13028	0.1604	8365	0.05527	3344	0.01505	13028	0.1604	11217	0.1269	11381	0.1553	cellular&nbsp;organisms>Bacteria>FCB&nbsp;group>Bacteroidetes/Chlorobi&nbsp;group>Bacteroidetes>Bacteroidia>Bacteroidales>Bacteroidaceae>Bacteroides
Bacteroides sp. HF-5287	S	2650157	12823	0.1579	10955	0.07238	3647	0.01642	12823	0.1579	11535	0.1305	10018	0.1367	cellular&nbsp;organisms>Bacteria>FCB&nbsp;group>Bacteroidetes/Chlorobi&nbsp;group>Bacteroidetes>Bacteroidia>Bacteroidales>Bacteroidaceae>Bacteroides>unclassified&nbsp;Bacteroides
Ruminococcus bicirculans	S	1160721	13945	0.1577	4628	0.03058	4030	0.01814	8559	0.1054	13945	0.1577	10577	0.1443	cellular&nbsp;organisms>Bacteria>Terrabacteria&nbsp;group>Firmicutes>Clostridia>Eubacteriales>Oscillospiraceae>Ruminococcus
Pseudomonas stutzeri	S	316	11501	0.1553	7104	0.04694	8305	0.03739	11501	0.1416	4638	0.05245	11382	0.1553	cellular&nbsp;organisms>Bacteria>Proteobacteria>Gammaproteobacteria>Pseudomonadales>Pseudomonadaceae>Pseudomonas>Pseudomonas&nbsp;stutzeri&nbsp;group>Pseudomonas&nbsp;stutzeri&nbsp;subgroup
Anaerostipes caccae	S	105841	13712	0.1551	2733	0.01806	2278	0.01026	3996	0.0492	13712	0.1551	4782	0.06524	cellular&nbsp;organisms>Bacteria>Terrabacteria&nbsp;group>Firmicutes>Clostridia>Eubacteriales>Lachnospiraceae>Anaerostipes
Alistipes sp. dk3624	S	2662363	12543	0.1544	5510	0.03641	4288	0.0193	12543	0.1544	3395	0.0384	9933	0.1355	cellular&nbsp;organisms>Bacteria>FCB&nbsp;group>Bacteroidetes/Chlorobi&nbsp;group>Bacteroidetes>Bacteroidia>Bacteroidales>Rikenellaceae>Alistipes>unclassified&nbsp;Alistipes
Acinetobacter sp. WCHA45	S	2004644	34199	0.154	11112	0.07342	34199	0.154	NA	NA	NA	NA	NA	NA	cellular&nbsp;organisms>Bacteria>Proteobacteria>Gammaproteobacteria>Pseudomonadales>Moraxellaceae>Acinetobacter>unclassified&nbsp;Acinetobacter
Ruminococcus champanellensis	S	1161942	11268	0.1537	4869	0.03217	5070	0.02283	9878	0.1216	6201	0.07013	11268	0.1537	cellular&nbsp;organisms>Bacteria>Terrabacteria&nbsp;group>Firmicutes>Clostridia>Eubacteriales>Oscillospiraceae>Ruminococcus
Ruthenibacterium lactatiformans	S	1550024	11264	0.1537	5050	0.03337	6819	0.0307	10441	0.1286	5706	0.06453	11264	0.1537	cellular&nbsp;organisms>Bacteria>Terrabacteria&nbsp;group>Firmicutes>Clostridia>Eubacteriales>Oscillospiraceae>Ruthenibacterium
Serratia marcescens	S	615	11259	0.1536	5907	0.03903	6688	0.03011	4225	0.05202	4978	0.0563	11259	0.1536	cellular&nbsp;organisms>Bacteria>Proteobacteria>Gammaproteobacteria>Enterobacterales>Yersiniaceae>Serratia
Mogibacterium pumilum	S	86332	12416	0.1529	3619	0.02391	7593	0.03418	12416	0.1529	11927	0.1349	7222	0.09852	cellular&nbsp;organisms>Bacteria>Terrabacteria&nbsp;group>Firmicutes>Clostridia>Eubacteriales>Eubacteriales&nbsp;incertae&nbsp;sedis>Clostridiales&nbsp;Family&nbsp;XIII.&nbsp;Incertae&nbsp;Sedis>Mogibacterium
Intestinimonas butyriciproducens	S	1297617	11180	0.1525	6285	0.04153	5855	0.02636	9656	0.1189	5794	0.06553	11180	0.1525	cellular&nbsp;organisms>Bacteria>Terrabacteria&nbsp;group>Firmicutes>Clostridia>Eubacteriales>Eubacteriales&nbsp;incertae&nbsp;sedis>Intestinimonas
[Clostridium] hylemonae	S	89153	13448	0.1521	3174	0.02097	2572	0.01158	4714	0.05804	13448	0.1521	5722	0.07806	cellular&nbsp;organisms>Bacteria>Terrabacteria&nbsp;group>Firmicutes>Clostridia>Eubacteriales>Lachnospiraceae>Lachnoclostridium
Achromobacter xylosoxidans	S	85698	12332	0.1518	5893	0.03894	6127	0.02758	12332	0.1518	5134	0.05806	11038	0.1506	cellular&nbsp;organisms>Bacteria>Proteobacteria>Betaproteobacteria>Burkholderiales>Alcaligenaceae>Achromobacter
Alistipes indistinctus	S	626932	12305	0.1515	6486	0.04285	4657	0.02097	12305	0.1515	4892	0.05533	9797	0.1337	cellular&nbsp;organisms>Bacteria>FCB&nbsp;group>Bacteroidetes/Chlorobi&nbsp;group>Bacteroidetes>Bacteroidia>Bacteroidales>Rikenellaceae>Alistipes
Bacteroides cellulosilyticus	S	246787	12293	0.151	8135	0.05375	3071	0.01383	12265	0.151	12293	0.139	8744	0.1193	cellular&nbsp;organisms>Bacteria>FCB&nbsp;group>Bacteroidetes/Chlorobi&nbsp;group>Bacteroidetes>Bacteroidia>Bacteroidales>Bacteroidaceae>Bacteroides
Acinetobacter lactucae	S	1785128	33222	0.1496	9076	0.05997	33222	0.1496	NA	NA	NA	NA	NA	NA	cellular&nbsp;organisms>Bacteria>Proteobacteria>Gammaproteobacteria>Pseudomonadales>Moraxellaceae>Acinetobacter>Acinetobacter&nbsp;calcoaceticus/baumannii&nbsp;complex
Treponema denticola	S	158	13036	0.1474	10391	0.06866	3671	0.01653	8211	0.1011	13036	0.1474	10602	0.1446	cellular&nbsp;organisms>Bacteria>Spirochaetes>Spirochaetia>Spirochaetales>Spirochaetaceae>Treponema
Tannerella forsythia	S	28112	11965	0.1473	6232	0.04118	2922	0.01315	11965	0.1473	7425	0.08397	9047	0.1234	cellular&nbsp;organisms>Bacteria>FCB&nbsp;group>Bacteroidetes/Chlorobi&nbsp;group>Bacteroidetes>Bacteroidia>Bacteroidales>Tannerellaceae>Tannerella
Butyricimonas faecalis	S	2093856	11911	0.1467	5735	0.03789	3852	0.01734	11911	0.1467	6636	0.07505	6720	0.09168	cellular&nbsp;organisms>Bacteria>FCB&nbsp;group>Bacteroidetes/Chlorobi&nbsp;group>Bacteroidetes>Bacteroidia>Bacteroidales>Odoribacteraceae>Butyricimonas
Clostridium saccharoperbutylacetonicum	S	36745	12866	0.1455	6059	0.04003	4216	0.01898	4215	0.0519	12866	0.1455	4406	0.06011	cellular&nbsp;organisms>Bacteria>Terrabacteria&nbsp;group>Firmicutes>Clostridia>Eubacteriales>Clostridiaceae>Clostridium
Sphingobacterium sp. UDSM-2020	S	2795738	32288	0.1454	15796	0.1044	32288	0.1454	2264	0.02788	2670	0.0302	1476	0.02014	cellular&nbsp;organisms>Bacteria>FCB&nbsp;group>Bacteroidetes/Chlorobi&nbsp;group>Bacteroidetes>Sphingobacteriia>Sphingobacteriales>Sphingobacteriaceae>Sphingobacterium>unclassified&nbsp;Sphingobacterium
Agrobacterium tumefaciens	S	358	10649	0.1453	8136	0.05376	8292	0.03733	10507	0.1294	9996	0.1131	10649	0.1453	cellular&nbsp;organisms>Bacteria>Proteobacteria>Alphaproteobacteria>Hyphomicrobiales>Rhizobiaceae>Rhizobium/Agrobacterium&nbsp;group>Agrobacterium>Agrobacterium&nbsp;tumefaciens&nbsp;complex
Sphingobacterium sp. ML3W	S	1538644	32247	0.1452	10766	0.07113	32247	0.1452	2074	0.02554	2264	0.0256	1625	0.02217	cellular&nbsp;organisms>Bacteria>FCB&nbsp;group>Bacteroidetes/Chlorobi&nbsp;group>Bacteroidetes>Sphingobacteriia>Sphingobacteriales>Sphingobacteriaceae>Sphingobacterium>unclassified&nbsp;Sphingobacterium
Petrimonas mucosa	S	1642646	11770	0.1449	5458	0.03606	2814	0.01267	11770	0.1449	6663	0.07536	10022	0.1367	cellular&nbsp;organisms>Bacteria>FCB&nbsp;group>Bacteroidetes/Chlorobi&nbsp;group>Bacteroidetes>Bacteroidia>Bacteroidales>Dysgonomonadaceae>Petrimonas
Bradyrhizobium diazoefficiens	S	1355477	10989	0.1449	8837	0.05839	10973	0.0494	10989	0.1353	5715	0.06463	10622	0.1449	cellular&nbsp;organisms>Bacteria>Proteobacteria>Alphaproteobacteria>Hyphomicrobiales>Bradyrhizobiaceae>Bradyrhizobium
Odoribacter splanchnicus	S	28118	11751	0.1447	5795	0.03829	2834	0.01276	11751	0.1447	7007	0.07925	7598	0.1037	cellular&nbsp;organisms>Bacteria>FCB&nbsp;group>Bacteroidetes/Chlorobi&nbsp;group>Bacteroidetes>Bacteroidia>Bacteroidales>Odoribacteraceae>Odoribacter
Comamonas kerstersii	S	225992	32086	0.1445	6863	0.04535	32086	0.1445	NA	NA	NA	NA	NA	NA	cellular&nbsp;organisms>Bacteria>Proteobacteria>Betaproteobacteria>Burkholderiales>Comamonadaceae>Comamonas
Acinetobacter sp. FDAARGOS_493	S	2420300	31981	0.144	NA	NA	31981	0.144	NA	NA	NA	NA	NA	NA	cellular&nbsp;organisms>Bacteria>Proteobacteria>Gammaproteobacteria>Pseudomonadales>Moraxellaceae>Acinetobacter>unclassified&nbsp;Acinetobacter
Fusobacterium nucleatum	S	851	12716	0.1438	5669	0.03746	5087	0.0229	6731	0.08288	12716	0.1438	6705	0.09147	cellular&nbsp;organisms>Bacteria>Fusobacteria>Fusobacteriia>Fusobacteriales>Fusobacteriaceae>Fusobacterium
Clostridium pasteurianum	S	1501	12458	0.1409	3407	0.02251	2941	0.01324	4775	0.05879	12458	0.1409	4917	0.06708	cellular&nbsp;organisms>Bacteria>Terrabacteria&nbsp;group>Firmicutes>Clostridia>Eubacteriales>Clostridiaceae>Clostridium
Collinsella aerofaciens	S	74426	10316	0.1407	4481	0.02961	5177	0.02331	8160	0.1005	5064	0.05727	10316	0.1407	cellular&nbsp;organisms>Bacteria>Terrabacteria&nbsp;group>Actinobacteria>Coriobacteriia>Coriobacteriales>Coriobacteriaceae>Collinsella
Enterobacter cloacae	S	550	10263	0.14	5787	0.03824	8983	0.04044	6393	0.07871	6368	0.07202	10263	0.14	cellular&nbsp;organisms>Bacteria>Proteobacteria>Gammaproteobacteria>Enterobacterales>Enterobacteriaceae>Enterobacter>Enterobacter&nbsp;cloacae&nbsp;complex
Burkholderia pseudomallei	S	28450	10069	0.1374	9238	0.06104	9858	0.04438	8831	0.1087	NA	NA	10069	0.1374	cellular&nbsp;organisms>Bacteria>Proteobacteria>Betaproteobacteria>Burkholderiales>Burkholderiaceae>Burkholderia>pseudomallei&nbsp;group
Bacteroides sp. CBA7301	S	2715212	12057	0.1364	7599	0.05021	2770	0.01247	10573	0.1302	12057	0.1364	9179	0.1252	cellular&nbsp;organisms>Bacteria>FCB&nbsp;group>Bacteroidetes/Chlorobi&nbsp;group>Bacteroidetes>Bacteroidia>Bacteroidales>Bacteroidaceae>Bacteroides>unclassified&nbsp;Bacteroides
Ruminococcus albus	S	1264	12044	0.1362	4747	0.03136	4240	0.01909	8818	0.1086	12044	0.1362	9452	0.1289	cellular&nbsp;organisms>Bacteria>Terrabacteria&nbsp;group>Firmicutes>Clostridia>Eubacteriales>Oscillospiraceae>Ruminococcus
Acinetobacter sp. C16S1	S	2609668	30017	0.1351	8391	0.05544	30017	0.1351	NA	NA	NA	NA	NA	NA	cellular&nbsp;organisms>Bacteria>Proteobacteria>Gammaproteobacteria>Pseudomonadales>Moraxellaceae>Acinetobacter>unclassified&nbsp;Acinetobacter
Pseudomonas fragi	S	296	13867	0.1348	9355	0.06181	13867	0.06243	2381	0.02932	11915	0.1348	NA	NA	cellular&nbsp;organisms>Bacteria>Proteobacteria>Gammaproteobacteria>Pseudomonadales>Pseudomonadaceae>Pseudomonas>Pseudomonas&nbsp;chlororaphis&nbsp;group
Lactiplantibacillus plantarum	S	1590	11912	0.1347	9919	0.06554	4288	0.0193	6802	0.08375	11912	0.1347	7113	0.09704	cellular&nbsp;organisms>Bacteria>Terrabacteria&nbsp;group>Firmicutes>Bacilli>Lactobacillales>Lactobacillaceae>Lactiplantibacillus
Limosilactobacillus gastricus	S	227942	11839	0.1339	NA	NA	NA	NA	NA	NA	11839	0.1339	NA	NA	cellular&nbsp;organisms>Bacteria>Terrabacteria&nbsp;group>Firmicutes>Bacilli>Lactobacillales>Lactobacillaceae>Limosilactobacillus
Blattabacterium cuenoti	S	1653831	20199	0.1335	20199	0.1335	19158	0.08625	8826	0.1087	8839	0.09996	7373	0.1006	cellular&nbsp;organisms>Bacteria>FCB&nbsp;group>Bacteroidetes/Chlorobi&nbsp;group>Bacteroidetes>Flavobacteriia>Flavobacteriales>Blattabacteriaceae>Blattabacterium
Rahnella sp. ERMR1:05	S	1805933	28924	0.1302	NA	NA	28924	0.1302	NA	NA	NA	NA	NA	NA	cellular&nbsp;organisms>Bacteria>Proteobacteria>Gammaproteobacteria>Enterobacterales>Yersiniaceae>Rahnella>unclassified&nbsp;Rahnella
Porphyromonas cangingivalis	S	36874	10559	0.13	5561	0.03674	2070	0.009319	10559	0.13	5965	0.06746	7536	0.1028	cellular&nbsp;organisms>Bacteria>FCB&nbsp;group>Bacteroidetes/Chlorobi&nbsp;group>Bacteroidetes>Bacteroidia>Bacteroidales>Porphyromonadaceae>Porphyromonas
Serratia plymuthica	S	82996	10551	0.1299	NA	NA	2720	0.01225	10551	0.1299	1913	0.02164	1579	0.02154	cellular&nbsp;organisms>Bacteria>Proteobacteria>Gammaproteobacteria>Enterobacterales>Yersiniaceae>Serratia
Mogibacterium diversum	S	114527	11475	0.1298	3678	0.0243	7206	0.03244	9769	0.1203	11475	0.1298	5748	0.07842	cellular&nbsp;organisms>Bacteria>Terrabacteria&nbsp;group>Firmicutes>Clostridia>Eubacteriales>Eubacteriales&nbsp;incertae&nbsp;sedis>Clostridiales&nbsp;Family&nbsp;XIII.&nbsp;Incertae&nbsp;Sedis>Mogibacterium
Myroides odoratimimus	S	76832	19240	0.1271	19240	0.1271	17373	0.07821	NA	NA	NA	NA	NA	NA	cellular&nbsp;organisms>Bacteria>FCB&nbsp;group>Bacteroidetes/Chlorobi&nbsp;group>Bacteroidetes>Flavobacteriia>Flavobacteriales>Flavobacteriaceae>Myroides
Bacteroides intestinalis	S	329854	11159	0.1262	6760	0.04467	2546	0.01146	9169	0.1129	11159	0.1262	8204	0.1119	cellular&nbsp;organisms>Bacteria>FCB&nbsp;group>Bacteroidetes/Chlorobi&nbsp;group>Bacteroidetes>Bacteroidia>Bacteroidales>Bacteroidaceae>Bacteroides
Intestinibaculum porci	S	2487118	11052	0.125	2425	0.01602	1590	0.007158	4189	0.05158	11052	0.125	4426	0.06038	cellular&nbsp;organisms>Bacteria>Terrabacteria&nbsp;group>Firmicutes>Erysipelotrichia>Erysipelotrichales>Erysipelotrichaceae>Intestinibaculum
Enterobacter hormaechei	S	158836	10067	0.124	NA	NA	6407	0.02884	10067	0.124	NA	NA	NA	NA	cellular&nbsp;organisms>Bacteria>Proteobacteria>Gammaproteobacteria>Enterobacterales>Enterobacteriaceae>Enterobacter>Enterobacter&nbsp;cloacae&nbsp;complex
Clostridium baratii	S	1561	10869	0.1229	4143	0.02737	4006	0.01803	4682	0.05765	10869	0.1229	4244	0.0579	cellular&nbsp;organisms>Bacteria>Terrabacteria&nbsp;group>Firmicutes>Clostridia>Eubacteriales>Clostridiaceae>Clostridium
Burkholderia cenocepacia	S	95486	9245	0.1227	5620	0.03713	6500	0.02926	9245	0.1138	NA	NA	8997	0.1227	cellular&nbsp;organisms>Bacteria>Proteobacteria>Betaproteobacteria>Burkholderiales>Burkholderiaceae>Burkholderia>Burkholderia&nbsp;cepacia&nbsp;complex
Variovorax paradoxus	S	34073	9168	0.1226	5703	0.03768	7269	0.03272	9168	0.1129	4317	0.04882	8986	0.1226	cellular&nbsp;organisms>Bacteria>Proteobacteria>Betaproteobacteria>Burkholderiales>Comamonadaceae>Variovorax
Clostridium sporogenes	S	1509	10744	0.1215	NA	NA	NA	NA	NA	NA	10744	0.1215	NA	NA	cellular&nbsp;organisms>Bacteria>Terrabacteria&nbsp;group>Firmicutes>Clostridia>Eubacteriales>Clostridiaceae>Clostridium
Berryella intestinalis	S	1531429	8866	0.121	3780	0.02498	5628	0.02534	6972	0.08584	3613	0.04086	8866	0.121	cellular&nbsp;organisms>Bacteria>Terrabacteria&nbsp;group>Actinobacteria>Coriobacteriia>Eggerthellales>Eggerthellaceae>Berryella
Rhodopseudomonas palustris	S	1076	8849	0.1207	5969	0.03944	6989	0.03146	7906	0.09734	3454	0.03906	8849	0.1207	cellular&nbsp;organisms>Bacteria>Proteobacteria>Alphaproteobacteria>Hyphomicrobiales>Bradyrhizobiaceae>Rhodopseudomonas
Bacteroides sp. M10	S	2763022	10623	0.1201	7000	0.04625	2398	0.0108	6645	0.08182	10623	0.1201	6181	0.08432	cellular&nbsp;organisms>Bacteria>FCB&nbsp;group>Bacteroidetes/Chlorobi&nbsp;group>Bacteroidetes>Bacteroidia>Bacteroidales>Bacteroidaceae>Bacteroides>unclassified&nbsp;Bacteroides
Clostridium cellulovorans	S	1493	10586	0.1197	2740	0.0181	2261	0.01018	3340	0.04112	10586	0.1197	3498	0.04772	cellular&nbsp;organisms>Bacteria>Terrabacteria&nbsp;group>Firmicutes>Clostridia>Eubacteriales>Clostridiaceae>Clostridium
Lysinibacillus varians	S	1145276	18062	0.1193	18062	0.1193	6544	0.02946	NA	NA	NA	NA	NA	NA	cellular&nbsp;organisms>Bacteria>Terrabacteria&nbsp;group>Firmicutes>Bacilli>Bacillales>Bacillaceae>Lysinibacillus
Anaerotignum propionicum	S	28446	10465	0.1184	2245	0.01483	1876	0.008446	3432	0.04226	10465	0.1184	3892	0.0531	cellular&nbsp;organisms>Bacteria>Terrabacteria&nbsp;group>Firmicutes>Clostridia>Eubacteriales>Lachnospiraceae>Anaerotignum
Paludibacter propionicigenes	S	185300	9594	0.1181	5719	0.03779	2446	0.01101	9594	0.1181	6747	0.07631	6158	0.08401	cellular&nbsp;organisms>Bacteria>FCB&nbsp;group>Bacteroidetes/Chlorobi&nbsp;group>Bacteroidetes>Bacteroidia>Bacteroidales>Paludibacteraceae>Paludibacter
Ruminiclostridium herbifermentans	S	2488810	10394	0.1176	3220	0.02128	3293	0.01483	4160	0.05122	10394	0.1176	4322	0.05896	cellular&nbsp;organisms>Bacteria>Terrabacteria&nbsp;group>Firmicutes>Clostridia>Eubacteriales>Oscillospiraceae>Ruminiclostridium
Slackia heliotrinireducens	S	84110	8613	0.1175	2961	0.01956	4189	0.01886	6361	0.07832	3975	0.04496	8613	0.1175	cellular&nbsp;organisms>Bacteria>Terrabacteria&nbsp;group>Actinobacteria>Coriobacteriia>Eggerthellales>Eggerthellaceae>Slackia
Kiritimatiella glycovorans	S	1307763	9527	0.1173	4465	0.0295	6138	0.02763	9527	0.1173	NA	NA	8167	0.1114	cellular&nbsp;organisms>Bacteria>PVC&nbsp;group>Kiritimatiellaeota>Kiritimatiellae>Kiritimatiellales>Kiritimatiellaceae>Kiritimatiella
Streptococcus lutetiensis	S	150055	17647	0.1166	17647	0.1166	NA	NA	NA	NA	4099	0.04636	NA	NA	cellular&nbsp;organisms>Bacteria>Terrabacteria&nbsp;group>Firmicutes>Bacilli>Lactobacillales>Streptococcaceae>Streptococcus
Bacteroides sp. CACC 737	S	2755405	8528	0.1163	NA	NA	NA	NA	6663	0.08204	8169	0.09239	8528	0.1163	cellular&nbsp;organisms>Bacteria>FCB&nbsp;group>Bacteroidetes/Chlorobi&nbsp;group>Bacteroidetes>Bacteroidia>Bacteroidales>Bacteroidaceae>Bacteroides>unclassified&nbsp;Bacteroides
Bacteroides caccae	S	47678	10256	0.116	6146	0.04061	2815	0.01267	8959	0.1103	10256	0.116	7384	0.1007	cellular&nbsp;organisms>Bacteria>FCB&nbsp;group>Bacteroidetes/Chlorobi&nbsp;group>Bacteroidetes>Bacteroidia>Bacteroidales>Bacteroidaceae>Bacteroides
Denitrobacterium detoxificans	S	79604	8468	0.1155	3063	0.02024	4417	0.01989	6233	0.07674	4270	0.04829	8468	0.1155	cellular&nbsp;organisms>Bacteria>Terrabacteria&nbsp;group>Actinobacteria>Coriobacteriia>Eggerthellales>Eggerthellaceae>Denitrobacterium
Buchnera aphidicola	S	9	10163	0.1149	7065	0.04668	6086	0.0274	7205	0.08871	10163	0.1149	7692	0.1049	cellular&nbsp;organisms>Bacteria>Proteobacteria>Gammaproteobacteria>Enterobacterales>Erwiniaceae>Buchnera
Finegoldia magna	S	1260	10119	0.1144	2995	0.01979	2312	0.01041	4615	0.05682	10119	0.1144	5260	0.07176	cellular&nbsp;organisms>Bacteria>Terrabacteria&nbsp;group>Firmicutes>Tissierellia>Tissierellales>Peptoniphilaceae>Finegoldia
Streptococcus agalactiae	S	1311	13278	0.1142	13278	0.08773	NA	NA	NA	NA	10100	0.1142	NA	NA	cellular&nbsp;organisms>Bacteria>Terrabacteria&nbsp;group>Firmicutes>Bacilli>Lactobacillales>Streptococcaceae>Streptococcus
Acinetobacter sp. M131	S	1280052	25350	0.1141	NA	NA	25350	0.1141	NA	NA	NA	NA	NA	NA	cellular&nbsp;organisms>Bacteria>Proteobacteria>Gammaproteobacteria>Pseudomonadales>Moraxellaceae>Acinetobacter>unclassified&nbsp;Acinetobacter
Flavobacterium sp. xlx-214	S	2654325	25218	0.1135	8629	0.05701	25218	0.1135	1203	0.01481	1164	0.01316	1204	0.01643	cellular&nbsp;organisms>Bacteria>FCB&nbsp;group>Bacteroidetes/Chlorobi&nbsp;group>Bacteroidetes>Flavobacteriia>Flavobacteriales>Flavobacteriaceae>Flavobacterium>unclassified&nbsp;Flavobacterium
Chryseobacterium sp. POL2	S	2713414	17178	0.1135	17178	0.1135	12525	0.05639	2122	0.02613	1881	0.02127	NA	NA	cellular&nbsp;organisms>Bacteria>FCB&nbsp;group>Bacteroidetes/Chlorobi&nbsp;group>Bacteroidetes>Flavobacteriia>Flavobacteriales>Weeksellaceae>Chryseobacterium&nbsp;group>Chryseobacterium>unclassified&nbsp;Chryseobacterium
Alicycliphilus denitrificans	S	179636	9210	0.1134	4487	0.02965	5696	0.02564	9210	0.1134	NA	NA	7288	0.09942	cellular&nbsp;organisms>Bacteria>Proteobacteria>Betaproteobacteria>Burkholderiales>Comamonadaceae>Alicycliphilus
Bacteroides caecimuris	S	1796613	8307	0.1133	5991	0.03958	1790	0.008059	8307	0.1023	7286	0.0824	8304	0.1133	cellular&nbsp;organisms>Bacteria>FCB&nbsp;group>Bacteroidetes/Chlorobi&nbsp;group>Bacteroidetes>Bacteroidia>Bacteroidales>Bacteroidaceae>Bacteroides
Christensenella sp. Marseille-P3954	S	2086585	8293	0.1131	3397	0.02244	4622	0.02081	6476	0.07974	1931	0.02184	8293	0.1131	cellular&nbsp;organisms>Bacteria>Terrabacteria&nbsp;group>Firmicutes>Clostridia>Eubacteriales>Christensenellaceae>Christensenella>unclassified&nbsp;Christensenella
Lysinibacillus fusiformis	S	28031	16956	0.112	16956	0.112	12325	0.05549	2357	0.02902	4463	0.05047	2144	0.02925	cellular&nbsp;organisms>Bacteria>Terrabacteria&nbsp;group>Firmicutes>Bacilli>Bacillales>Bacillaceae>Lysinibacillus
Pseudomonas syringae	S	317	8935	0.1104	8150	0.05385	8935	0.04023	7569	0.09319	3915	0.04428	8090	0.1104	cellular&nbsp;organisms>Bacteria>Proteobacteria>Gammaproteobacteria>Pseudomonadales>Pseudomonadaceae>Pseudomonas>Pseudomonas&nbsp;syringae&nbsp;group>Pseudomonas&nbsp;syringae&nbsp;group&nbsp;genomosp.&nbsp;1
Coprobacter sp. 2CBH44	S	2751153	8883	0.1094	4888	0.0323	2269	0.01022	8883	0.1094	7519	0.08504	5398	0.07364	cellular&nbsp;organisms>Bacteria>FCB&nbsp;group>Bacteroidetes/Chlorobi&nbsp;group>Bacteroidetes>Bacteroidia>Bacteroidales>Barnesiellaceae>Coprobacter>unclassified&nbsp;Coprobacter
Faecalibacillus intestinalis	S	1982626	9620	0.1088	NA	NA	NA	NA	NA	NA	9620	0.1088	NA	NA	cellular&nbsp;organisms>Bacteria>Terrabacteria&nbsp;group>Firmicutes>Erysipelotrichia>Erysipelotrichales>Erysipelotrichaceae>Faecalibacillus
Pannonibacter phragmitetus	S	121719	16431	0.1086	16431	0.1086	9668	0.04353	3834	0.04721	NA	NA	4048	0.05522	cellular&nbsp;organisms>Bacteria>Proteobacteria>Alphaproteobacteria>Hyphomicrobiales>Stappiaceae>Pannonibacter
Aeromonas hydrophila	S	644	7856	0.1072	5336	0.03526	4781	0.02152	7835	0.09647	4431	0.05011	7856	0.1072	cellular&nbsp;organisms>Bacteria>Proteobacteria>Gammaproteobacteria>Aeromonadales>Aeromonadaceae>Aeromonas
Streptomyces lydicus	S	47763	11407	0.1063	11407	0.07537	6201	0.02792	6771	0.08337	NA	NA	7789	0.1063	cellular&nbsp;organisms>Bacteria>Terrabacteria&nbsp;group>Actinobacteria>Actinomycetia>Streptomycetales>Streptomycetaceae>Streptomyces
Clostridium saccharobutylicum	S	169679	9376	0.106	4878	0.03223	2890	0.01301	5455	0.06717	9376	0.106	6729	0.0918	cellular&nbsp;organisms>Bacteria>Terrabacteria&nbsp;group>Firmicutes>Clostridia>Eubacteriales>Clostridiaceae>Clostridium
Acutalibacter muris	S	1796620	7753	0.1058	3945	0.02607	4295	0.01934	6693	0.08241	4174	0.04721	7753	0.1058	cellular&nbsp;organisms>Bacteria>Terrabacteria&nbsp;group>Firmicutes>Clostridia>Eubacteriales>Oscillospiraceae>Acutalibacter
Succinivibrio dextrinosolvens	S	83771	9341	0.1056	6923	0.04574	2014	0.009067	4049	0.04985	9341	0.1056	4009	0.05469	cellular&nbsp;organisms>Bacteria>Proteobacteria>Gammaproteobacteria>Aeromonadales>Succinivibrionaceae>Succinivibrio
Comamonas testosteroni	S	285	23284	0.1048	7295	0.0482	23284	0.1048	5028	0.06191	NA	NA	4899	0.06683	cellular&nbsp;organisms>Bacteria>Proteobacteria>Betaproteobacteria>Burkholderiales>Comamonadaceae>Comamonas
Erysipelatoclostridium ramosum	S	1547	9213	0.1042	4391	0.02901	2359	0.01062	6652	0.0819	9213	0.1042	6054	0.08259	cellular&nbsp;organisms>Bacteria>Terrabacteria&nbsp;group>Firmicutes>Erysipelotrichia>Erysipelotrichales>Erysipelotrichaceae>Erysipelatoclostridium
Brevibacillus laterosporus	S	1465	8409	0.104	5603	0.03702	5911	0.02661	8409	0.1035	7586	0.08579	7627	0.104	cellular&nbsp;organisms>Bacteria>Terrabacteria&nbsp;group>Firmicutes>Bacilli>Bacillales>Paenibacillaceae>Brevibacillus
Rhodococcus opacus	S	37919	8240	0.1037	6175	0.0408	6543	0.02946	8240	0.1015	NA	NA	7604	0.1037	cellular&nbsp;organisms>Bacteria>Terrabacteria&nbsp;group>Actinobacteria>Actinomycetia>Corynebacteriales>Nocardiaceae>Rhodococcus
Bacteroides sp. HF-162	S	2785531	8396	0.1034	NA	NA	NA	NA	8396	0.1034	NA	NA	NA	NA	cellular&nbsp;organisms>Bacteria>FCB&nbsp;group>Bacteroidetes/Chlorobi&nbsp;group>Bacteroidetes>Bacteroidia>Bacteroidales>Bacteroidaceae>Bacteroides>unclassified&nbsp;Bacteroides
Acinetobacter oleivorans	S	1148157	22889	0.103	6423	0.04244	22889	0.103	NA	NA	NA	NA	NA	NA	cellular&nbsp;organisms>Bacteria>Proteobacteria>Gammaproteobacteria>Pseudomonadales>Moraxellaceae>Acinetobacter
Bifidobacterium longum	S	216816	8314	0.1024	6876	0.04543	4729	0.02129	7222	0.08892	8314	0.09403	7505	0.1024	cellular&nbsp;organisms>Bacteria>Terrabacteria&nbsp;group>Actinobacteria>Actinomycetia>Bifidobacteriales>Bifidobacteriaceae>Bifidobacterium
[Clostridium] innocuum	S	1522	9043	0.1023	3967	0.02621	2904	0.01307	5830	0.07178	9043	0.1023	5935	0.08097	cellular&nbsp;organisms>Bacteria>Terrabacteria&nbsp;group>Firmicutes>Erysipelotrichia>Erysipelotrichales>Erysipelotrichaceae>Erysipelatoclostridium
Mesorhizobium loti	S	381	8284	0.102	NA	NA	NA	NA	8284	0.102	NA	NA	NA	NA	cellular&nbsp;organisms>Bacteria>Proteobacteria>Alphaproteobacteria>Hyphomicrobiales>Phyllobacteriaceae>Mesorhizobium
Vibrio cholerae	S	666	7488	0.1014	7488	0.04948	7363	0.03315	2644	0.03255	4655	0.05265	7430	0.1014	cellular&nbsp;organisms>Bacteria>Proteobacteria>Gammaproteobacteria>Vibrionales>Vibrionaceae>Vibrio
Cupriavidus taiwanensis	S	164546	7806	0.1013	4534	0.02996	5816	0.02618	7806	0.09611	3768	0.04261	7424	0.1013	cellular&nbsp;organisms>Bacteria>Proteobacteria>Betaproteobacteria>Burkholderiales>Burkholderiaceae>Cupriavidus
Proteiniphilum saccharofermentans	S	1642647	8149	0.1003	4185	0.02765	2250	0.01013	8149	0.1003	6142	0.06946	5159	0.07038	cellular&nbsp;organisms>Bacteria>FCB&nbsp;group>Bacteroidetes/Chlorobi&nbsp;group>Bacteroidetes>Bacteroidia>Bacteroidales>Dysgonomonadaceae>Proteiniphilum
Clostridium sp. DL-VIII	S	641107	8853	0.1001	4899	0.03237	3151	0.01419	3006	0.03701	8853	0.1001	3433	0.04683	cellular&nbsp;organisms>Bacteria>Terrabacteria&nbsp;group>Firmicutes>Clostridia>Eubacteriales>Clostridiaceae>Clostridium>unclassified&nbsp;Clostridium
Adlercreutzia equolifaciens	S	446660	7329	0.09998	3582	0.02367	4248	0.01912	5608	0.06905	3470	0.03924	7329	0.09998	cellular&nbsp;organisms>Bacteria>Terrabacteria&nbsp;group>Actinobacteria>Coriobacteriia>Eggerthellales>Eggerthellaceae>Adlercreutzia
Peribacillus psychrosaccharolyticus	S	1407	15131	0.09997	15131	0.09997	4959	0.02233	1575	0.01939	1476	0.01669	1482	0.02022	cellular&nbsp;organisms>Bacteria>Terrabacteria&nbsp;group>Firmicutes>Bacilli>Bacillales>Bacillaceae>Peribacillus
Porphyromonas asaccharolytica	S	28123	8113	0.09989	5349	0.03534	1663	0.007487	8113	0.09989	6262	0.07082	7024	0.09582	cellular&nbsp;organisms>Bacteria>FCB&nbsp;group>Bacteroidetes/Chlorobi&nbsp;group>Bacteroidetes>Bacteroidia>Bacteroidales>Porphyromonadaceae>Porphyromonas
Bacillus velezensis	S	492670	14989	0.09904	14989	0.09904	5128	0.02309	7316	0.09008	NA	NA	NA	NA	cellular&nbsp;organisms>Bacteria>Terrabacteria&nbsp;group>Firmicutes>Bacilli>Bacillales>Bacillaceae>Bacillus>Bacillus&nbsp;subtilis&nbsp;group>Bacillus&nbsp;amyloliquefaciens&nbsp;group
Chryseobacterium balustinum	S	246	14967	0.09889	14967	0.09889	6915	0.03113	NA	NA	NA	NA	NA	NA	cellular&nbsp;organisms>Bacteria>FCB&nbsp;group>Bacteroidetes/Chlorobi&nbsp;group>Bacteroidetes>Flavobacteriia>Flavobacteriales>Weeksellaceae>Chryseobacterium&nbsp;group>Chryseobacterium
Eggerthella lenta	S	84112	7233	0.09867	2417	0.01597	4019	0.01809	5798	0.07139	2478	0.02803	7233	0.09867	cellular&nbsp;organisms>Bacteria>Terrabacteria&nbsp;group>Actinobacteria>Coriobacteriia>Eggerthellales>Eggerthellaceae>Eggerthella
Treponema parvum	S	138851	7836	0.09866	7836	0.05177	1860	0.008374	4566	0.05622	7741	0.08755	7232	0.09866	cellular&nbsp;organisms>Bacteria>Spirochaetes>Spirochaetia>Spirochaetales>Spirochaetaceae>Treponema
Lactococcus lactis	S	1358	9798	0.09799	9798	0.06474	4354	0.0196	5366	0.06607	8664	0.09799	5554	0.07577	cellular&nbsp;organisms>Bacteria>Terrabacteria&nbsp;group>Firmicutes>Bacilli>Lactobacillales>Streptococcaceae>Lactococcus
Listeria ivanovii	S	1638	8501	0.09614	2974	0.01965	NA	NA	3723	0.04584	8501	0.09614	NA	NA	cellular&nbsp;organisms>Bacteria>Terrabacteria&nbsp;group>Firmicutes>Bacilli>Bacillales>Listeriaceae>Listeria
Aminipila sp. CBA3637	S	2697030	8466	0.09575	3021	0.01996	3901	0.01756	6461	0.07955	8466	0.09575	6429	0.08771	cellular&nbsp;organisms>Bacteria>Terrabacteria&nbsp;group>Firmicutes>Clostridia>Eubacteriales>Eubacteriales&nbsp;incertae&nbsp;sedis>Clostridiales&nbsp;Family&nbsp;XIII.&nbsp;Incertae&nbsp;Sedis>Aminipila>unclassified&nbsp;Aminipila
Mycobacterium avium	S	1764	6988	0.09533	NA	NA	NA	NA	6741	0.083	NA	NA	6988	0.09533	cellular&nbsp;organisms>Bacteria>Terrabacteria&nbsp;group>Actinobacteria>Actinomycetia>Corynebacteriales>Mycobacteriaceae>Mycobacterium>Mycobacterium&nbsp;avium&nbsp;complex&nbsp;(MAC)
Prochlorococcus marinus	S	1219	8419	0.09521	3201	0.02115	3074	0.01384	4404	0.05422	8419	0.09521	3895	0.05314	cellular&nbsp;organisms>Bacteria>Terrabacteria&nbsp;group>Cyanobacteria/Melainabacteria&nbsp;group>Cyanobacteria>Synechococcales>Prochloraceae>Prochlorococcus
Lysinibacillus sphaericus	S	1421	14356	0.09485	14356	0.09485	9905	0.04459	2090	0.02573	3640	0.04117	2462	0.03359	cellular&nbsp;organisms>Bacteria>Terrabacteria&nbsp;group>Firmicutes>Bacilli>Bacillales>Bacillaceae>Lysinibacillus
Sphingobium yanoikuyae	S	13690	7687	0.09483	NA	NA	7241	0.0326	7687	0.09465	NA	NA	6951	0.09483	cellular&nbsp;organisms>Bacteria>Proteobacteria>Alphaproteobacteria>Sphingomonadales>Sphingomonadaceae>Sphingobium
Peptacetobacter hiranonis	S	89152	8377	0.09474	2574	0.01701	2267	0.01021	4118	0.0507	8377	0.09474	4130	0.05634	cellular&nbsp;organisms>Bacteria>Terrabacteria&nbsp;group>Firmicutes>Clostridia>Eubacteriales>Peptostreptococcaceae>Peptacetobacter
Campylobacter jejuni	S	197	8355	0.09449	NA	NA	NA	NA	NA	NA	8355	0.09449	NA	NA	cellular&nbsp;organisms>Bacteria>Proteobacteria>delta/epsilon&nbsp;subdivisions>Epsilonproteobacteria>Campylobacterales>Campylobacteraceae>Campylobacter
Cupriavidus metallidurans	S	119219	6898	0.0941	NA	NA	NA	NA	4284	0.05275	NA	NA	6898	0.0941	cellular&nbsp;organisms>Bacteria>Proteobacteria>Betaproteobacteria>Burkholderiales>Burkholderiaceae>Cupriavidus
Hymenobacter radiodurans	S	2496028	6789	0.09262	NA	NA	NA	NA	NA	NA	NA	NA	6789	0.09262	cellular&nbsp;organisms>Bacteria>FCB&nbsp;group>Bacteroidetes/Chlorobi&nbsp;group>Bacteroidetes>Cytophagia>Cytophagales>Hymenobacteraceae>Hymenobacter
Xanthomonas citri	S	346	7503	0.09238	NA	NA	NA	NA	7503	0.09238	NA	NA	NA	NA	cellular&nbsp;organisms>Bacteria>Proteobacteria>Gammaproteobacteria>Xanthomonadales>Xanthomonadaceae>Xanthomonas>Xanthomonas&nbsp;citri&nbsp;group
Weissella soli	S	155866	7482	0.09212	NA	NA	NA	NA	7482	0.09212	5946	0.06725	NA	NA	cellular&nbsp;organisms>Bacteria>Terrabacteria&nbsp;group>Firmicutes>Bacilli>Lactobacillales>Lactobacillaceae>Weissella
Aminipila sp. JN-18	S	2507160	8111	0.09173	2473	0.01634	3097	0.01394	5298	0.06523	8111	0.09173	5397	0.07363	cellular&nbsp;organisms>Bacteria>Terrabacteria&nbsp;group>Firmicutes>Clostridia>Eubacteriales>Eubacteriales&nbsp;incertae&nbsp;sedis>Clostridiales&nbsp;Family&nbsp;XIII.&nbsp;Incertae&nbsp;Sedis>Aminipila>unclassified&nbsp;Aminipila
Pseudomonas sp. TUM18999	S	2725477	7439	0.09159	NA	NA	NA	NA	7439	0.09159	NA	NA	NA	NA	cellular&nbsp;organisms>Bacteria>Proteobacteria>Gammaproteobacteria>Pseudomonadales>Pseudomonadaceae>Pseudomonas>unclassified&nbsp;Pseudomonas
Clostridium kluyveri	S	1534	8071	0.09128	2210	0.0146	1747	0.007865	2716	0.03344	8071	0.09128	2679	0.03655	cellular&nbsp;organisms>Bacteria>Terrabacteria&nbsp;group>Firmicutes>Clostridia>Eubacteriales>Clostridiaceae>Clostridium
Olsenella umbonata	S	604330	6669	0.09098	3213	0.02123	4329	0.01949	6443	0.07933	NA	NA	6669	0.09098	cellular&nbsp;organisms>Bacteria>Terrabacteria&nbsp;group>Actinobacteria>Coriobacteriia>Coriobacteriales>Atopobiaceae>Olsenella
Longibaculum sp. KGMB06250	S	2584943	7981	0.09026	NA	NA	NA	NA	NA	NA	7981	0.09026	NA	NA	cellular&nbsp;organisms>Bacteria>Terrabacteria&nbsp;group>Firmicutes>Erysipelotrichia>Erysipelotrichales>Erysipelotrichaceae>Longibaculum>unclassified&nbsp;Longibaculum
Lysinibacillus sp. SGAir0095	S	2070463	13613	0.08994	13613	0.08994	7701	0.03467	NA	NA	2049	0.02317	NA	NA	cellular&nbsp;organisms>Bacteria>Terrabacteria&nbsp;group>Firmicutes>Bacilli>Bacillales>Bacillaceae>Lysinibacillus>unclassified&nbsp;Lysinibacillus
Azospirillum brasilense	S	192	7084	0.08978	3894	0.02573	5149	0.02318	7084	0.08722	NA	NA	6581	0.08978	cellular&nbsp;organisms>Bacteria>Proteobacteria>Alphaproteobacteria>Rhodospirillales>Rhodospirillaceae>Azospirillum
Adlercreutzia sp. 8CFCBH1	S	2707299	6540	0.08922	NA	NA	3402	0.01532	4954	0.061	2798	0.03164	6540	0.08922	cellular&nbsp;organisms>Bacteria>Terrabacteria&nbsp;group>Actinobacteria>Coriobacteriia>Eggerthellales>Eggerthellaceae>Adlercreutzia>unclassified&nbsp;Adlercreutzia
Limosilactobacillus reuteri	S	1598	7876	0.08907	3236	0.02138	1608	0.007239	3362	0.04139	7876	0.08907	3639	0.04964	cellular&nbsp;organisms>Bacteria>Terrabacteria&nbsp;group>Firmicutes>Bacilli>Lactobacillales>Lactobacillaceae>Limosilactobacillus
Cellulosilyticum lentocellum	S	29360	7875	0.08906	NA	NA	NA	NA	NA	NA	7875	0.08906	2663	0.03633	cellular&nbsp;organisms>Bacteria>Terrabacteria&nbsp;group>Firmicutes>Clostridia>Eubacteriales>Lachnospiraceae>Cellulosilyticum
Aliarcobacter butzleri	S	28197	6526	0.08903	1982	0.0131	NA	NA	3123	0.03845	2650	0.02997	6526	0.08903	cellular&nbsp;organisms>Bacteria>Proteobacteria>delta/epsilon&nbsp;subdivisions>Epsilonproteobacteria>Campylobacterales>Campylobacteraceae>Arcobacter&nbsp;group>Aliarcobacter
Chryseobacterium indoltheticum	S	254	13452	0.08888	13452	0.08888	8911	0.04012	2278	0.02805	3641	0.04118	2023	0.0276	cellular&nbsp;organisms>Bacteria>FCB&nbsp;group>Bacteroidetes/Chlorobi&nbsp;group>Bacteroidetes>Flavobacteriia>Flavobacteriales>Weeksellaceae>Chryseobacterium&nbsp;group>Chryseobacterium
Listeria monocytogenes	S	1639	7759	0.08849	7759	0.05127	7450	0.03354	7187	0.08849	6529	0.07384	6117	0.08345	cellular&nbsp;organisms>Bacteria>Terrabacteria&nbsp;group>Firmicutes>Bacilli>Bacillales>Listeriaceae>Listeria
Clostridium thermarum	S	1716543	7821	0.08845	2335	0.01543	3701	0.01666	3162	0.03893	7821	0.08845	3404	0.04644	cellular&nbsp;organisms>Bacteria>Terrabacteria&nbsp;group>Firmicutes>Clostridia>Eubacteriales>Clostridiaceae>Clostridium
Phascolarctobacterium faecium	S	33025	6477	0.08836	2394	0.01582	1780	0.008014	3086	0.038	5778	0.06535	6477	0.08836	cellular&nbsp;organisms>Bacteria>Terrabacteria&nbsp;group>Firmicutes>Negativicutes>Acidaminococcales>Acidaminococcaceae>Phascolarctobacterium
Viridibacillus sp. JNUCC-6	S	2779527	13346	0.08818	13346	0.08818	7316	0.03294	1257	0.01548	2256	0.02551	1238	0.01689	cellular&nbsp;organisms>Bacteria>Terrabacteria&nbsp;group>Firmicutes>Bacilli>Bacillales>Planococcaceae>Viridibacillus>unclassified&nbsp;Viridibacillus
Eubacterium limosum	S	1736	7784	0.08803	4042	0.02671	4341	0.01954	6370	0.07843	7784	0.08803	6412	0.08747	cellular&nbsp;organisms>Bacteria>Terrabacteria&nbsp;group>Firmicutes>Clostridia>Eubacteriales>Eubacteriaceae>Eubacterium
Chitinophaga pinensis	S	79329	7094	0.08735	3760	0.02484	2768	0.01246	7094	0.08735	4951	0.05599	5717	0.07799	cellular&nbsp;organisms>Bacteria>FCB&nbsp;group>Bacteroidetes/Chlorobi&nbsp;group>Bacteroidetes>Chitinophagia>Chitinophagales>Chitinophagaceae>Chitinophaga
Butyricimonas virosa	S	544645	7066	0.087	4519	0.02986	1934	0.008707	7066	0.087	5367	0.0607	6361	0.08678	cellular&nbsp;organisms>Bacteria>FCB&nbsp;group>Bacteroidetes/Chlorobi&nbsp;group>Bacteroidetes>Bacteroidia>Bacteroidales>Odoribacteraceae>Butyricimonas
Burkholderia cepacia	S	292	6359	0.08675	4043	0.02671	6326	0.02848	6213	0.0765	NA	NA	6359	0.08675	cellular&nbsp;organisms>Bacteria>Proteobacteria>Betaproteobacteria>Burkholderiales>Burkholderiaceae>Burkholderia>Burkholderia&nbsp;cepacia&nbsp;complex
Proteus vulgaris	S	585	6349	0.08661	3825	0.02527	5640	0.02539	4437	0.05463	5758	0.06512	6349	0.08661	cellular&nbsp;organisms>Bacteria>Proteobacteria>Gammaproteobacteria>Enterobacterales>Morganellaceae>Proteus
Nostoc piscinale	S	224012	6278	0.08565	NA	NA	NA	NA	NA	NA	NA	NA	6278	0.08565	cellular&nbsp;organisms>Bacteria>Terrabacteria&nbsp;group>Cyanobacteria/Melainabacteria&nbsp;group>Cyanobacteria>Nostocales>Nostocaceae>Nostoc
Sphingobacterium multivorum	S	28454	9049	0.08546	9049	0.05979	8886	0.04	6941	0.08546	6734	0.07616	5075	0.06923	cellular&nbsp;organisms>Bacteria>FCB&nbsp;group>Bacteroidetes/Chlorobi&nbsp;group>Bacteroidetes>Sphingobacteriia>Sphingobacteriales>Sphingobacteriaceae>Sphingobacterium
Lysinibacillus sp. FJAT-51161	S	2590012	12889	0.08516	12889	0.08516	8401	0.03782	NA	NA	1884	0.02131	NA	NA	cellular&nbsp;organisms>Bacteria>Terrabacteria&nbsp;group>Firmicutes>Bacilli>Bacillales>Bacillaceae>Lysinibacillus>unclassified&nbsp;Lysinibacillus
Ralstonia solanacearum	S	305	6613	0.08505	4471	0.02954	6005	0.02703	6613	0.08142	NA	NA	6234	0.08505	cellular&nbsp;organisms>Bacteria>Proteobacteria>Betaproteobacteria>Burkholderiales>Burkholderiaceae>Ralstonia
Eggerthella sp. YY7918	S	502558	6225	0.08492	2251	0.01487	3408	0.01534	4875	0.06002	3324	0.03759	6225	0.08492	cellular&nbsp;organisms>Bacteria>Terrabacteria&nbsp;group>Actinobacteria>Coriobacteriia>Eggerthellales>Eggerthellaceae>Eggerthella>unclassified&nbsp;Eggerthella
Clostridium sp. BNL1100	S	755731	7496	0.08478	2163	0.01429	1656	0.007455	3220	0.03965	7496	0.08478	3290	0.04488	cellular&nbsp;organisms>Bacteria>Terrabacteria&nbsp;group>Firmicutes>Clostridia>Eubacteriales>Clostridiaceae>Clostridium>unclassified&nbsp;Clostridium
Selenomonas ruminantium	S	971	7468	0.08446	3283	0.02169	2450	0.01103	4043	0.04978	7468	0.08446	5773	0.07876	cellular&nbsp;organisms>Bacteria>Terrabacteria&nbsp;group>Firmicutes>Negativicutes>Selenomonadales>Selenomonadaceae>Selenomonas
Gordonibacter pamelaeae	S	471189	6173	0.08421	2404	0.01588	3633	0.01636	5000	0.06156	3004	0.03397	6173	0.08421	cellular&nbsp;organisms>Bacteria>Terrabacteria&nbsp;group>Actinobacteria>Coriobacteriia>Eggerthellales>Eggerthellaceae>Gordonibacter
Monoglobus pectinilyticus	S	1981510	6168	0.08415	2516	0.01662	2167	0.009756	5776	0.07112	6145	0.0695	6168	0.08415	cellular&nbsp;organisms>Bacteria>Terrabacteria&nbsp;group>Firmicutes>Clostridia>Eubacteriales>Eubacteriales&nbsp;incertae&nbsp;sedis>Monoglobus
Ethanoligenens harbinense	S	253239	6153	0.08394	2642	0.01746	3438	0.01548	4842	0.05962	1938	0.02192	6153	0.08394	cellular&nbsp;organisms>Bacteria>Terrabacteria&nbsp;group>Firmicutes>Clostridia>Eubacteriales>Oscillospiraceae>Ethanoligenens
Clostridium sp. CT4	S	2320868	7398	0.08367	2744	0.01813	2929	0.01319	2649	0.03262	7398	0.08367	3027	0.0413	cellular&nbsp;organisms>Bacteria>Terrabacteria&nbsp;group>Firmicutes>Clostridia>Eubacteriales>Clostridiaceae>Clostridium>unclassified&nbsp;Clostridium
Hymenobacter sp. HDW8	S	2714932	6784	0.08353	NA	NA	NA	NA	6784	0.08353	NA	NA	NA	NA	cellular&nbsp;organisms>Bacteria>FCB&nbsp;group>Bacteroidetes/Chlorobi&nbsp;group>Bacteroidetes>Cytophagia>Cytophagales>Hymenobacteraceae>Hymenobacter>unclassified&nbsp;Hymenobacter
Bacteroides coprosuis	S	151276	7315	0.08339	5193	0.03431	2237	0.01007	6773	0.08339	7315	0.08273	4991	0.06809	cellular&nbsp;organisms>Bacteria>FCB&nbsp;group>Bacteroidetes/Chlorobi&nbsp;group>Bacteroidetes>Bacteroidia>Bacteroidales>Bacteroidaceae>Bacteroides
Clostridium bornimense	S	1216932	7338	0.08299	2604	0.01721	2292	0.01032	2967	0.03653	7338	0.08299	3330	0.04543	cellular&nbsp;organisms>Bacteria>Terrabacteria&nbsp;group>Firmicutes>Clostridia>Eubacteriales>Clostridiaceae>Clostridium
Bradyrhizobium lablabi	S	722472	6077	0.0829	NA	NA	NA	NA	4611	0.05677	NA	NA	6077	0.0829	cellular&nbsp;organisms>Bacteria>Proteobacteria>Alphaproteobacteria>Hyphomicrobiales>Bradyrhizobiaceae>Bradyrhizobium
Flavobacterium columnare	S	996	17028	0.08287	12543	0.08287	17028	0.07666	3585	0.04414	3085	0.03489	2372	0.03236	cellular&nbsp;organisms>Bacteria>FCB&nbsp;group>Bacteroidetes/Chlorobi&nbsp;group>Bacteroidetes>Flavobacteriia>Flavobacteriales>Flavobacteriaceae>Flavobacterium
Archangium violaceum	S	83451	6069	0.08279	2830	0.0187	3987	0.01795	5634	0.06937	NA	NA	6069	0.08279	cellular&nbsp;organisms>Bacteria>Proteobacteria>delta/epsilon&nbsp;subdivisions>Deltaproteobacteria>Myxococcales>Cystobacterineae>Archangiaceae>Archangium
Selenomonas sputigena	S	69823	6063	0.08271	2863	0.01892	3610	0.01625	5568	0.06856	1874	0.02119	6063	0.08271	cellular&nbsp;organisms>Bacteria>Terrabacteria&nbsp;group>Firmicutes>Negativicutes>Selenomonadales>Selenomonadaceae>Selenomonas
Burkholderia thailandensis	S	57975	6709	0.08261	NA	NA	NA	NA	6709	0.08261	NA	NA	NA	NA	cellular&nbsp;organisms>Bacteria>Proteobacteria>Betaproteobacteria>Burkholderiales>Burkholderiaceae>Burkholderia>pseudomallei&nbsp;group
Desulfovibrio desulfuricans	S	876	6707	0.08258	3274	0.02163	3189	0.01436	6707	0.08258	3409	0.03855	5510	0.07517	cellular&nbsp;organisms>Bacteria>Proteobacteria>delta/epsilon&nbsp;subdivisions>Deltaproteobacteria>Desulfovibrionales>Desulfovibrionaceae>Desulfovibrio
Synechococcus sp. PCC 7336	S	195250	6511	0.08199	NA	NA	3981	0.01792	6511	0.08017	NA	NA	6010	0.08199	cellular&nbsp;organisms>Bacteria>Terrabacteria&nbsp;group>Cyanobacteria/Melainabacteria&nbsp;group>Cyanobacteria>Synechococcales>Synechococcaceae>Synechococcus>unclassified&nbsp;Synechococcus
Caproiciproducens sp. NJN-50	S	2507162	5992	0.08174	3557	0.0235	3644	0.01641	5562	0.06848	1769	0.02001	5992	0.08174	cellular&nbsp;organisms>Bacteria>Terrabacteria&nbsp;group>Firmicutes>Clostridia>Eubacteriales>Oscillospiraceae>Caproiciproducens>unclassified&nbsp;Caproiciproducens
Acetivibrio clariflavus	S	288965	7164	0.08102	2849	0.01882	3091	0.01392	5043	0.06209	7164	0.08102	5067	0.06913	cellular&nbsp;organisms>Bacteria>Terrabacteria&nbsp;group>Firmicutes>Clostridia>Eubacteriales>Oscillospiraceae>Acetivibrio
Clostridium sp. JN-9	S	2507159	7074	0.08	1582	0.01045	1367	0.006154	2324	0.02861	7074	0.08	2401	0.03276	cellular&nbsp;organisms>Bacteria>Terrabacteria&nbsp;group>Firmicutes>Clostridia>Eubacteriales>Clostridiaceae>Clostridium>unclassified&nbsp;Clostridium
Brevibacterium casei	S	33889	7004	0.07968	7004	0.04628	4858	0.02187	4141	0.05099	NA	NA	5841	0.07968	cellular&nbsp;organisms>Bacteria>Terrabacteria&nbsp;group>Actinobacteria>Actinomycetia>Micrococcales>Brevibacteriaceae>Brevibacterium
Pseudomonas chlororaphis	S	587753	8972	0.07941	6563	0.04336	8972	0.04039	6409	0.07891	2575	0.02912	5821	0.07941	cellular&nbsp;organisms>Bacteria>Proteobacteria>Gammaproteobacteria>Pseudomonadales>Pseudomonadaceae>Pseudomonas>Pseudomonas&nbsp;chlororaphis&nbsp;group
Bulleidia sp. zg-1006	S	2806552	7019	0.07938	2580	0.01705	1694	0.007626	4208	0.05181	7019	0.07938	3558	0.04854	cellular&nbsp;organisms>Bacteria>Terrabacteria&nbsp;group>Firmicutes>Erysipelotrichia>Erysipelotrichales>Erysipelotrichaceae>Bulleidia>unclassified&nbsp;Bulleidia
Verrucomicrobium sp. GAS474	S	1882831	6415	0.07899	3117	0.02059	4067	0.01831	6415	0.07899	NA	NA	5412	0.07383	cellular&nbsp;organisms>Bacteria>PVC&nbsp;group>Verrucomicrobia>Verrucomicrobiae>Verrucomicrobiales>Verrucomicrobiaceae>Verrucomicrobium>unclassified&nbsp;Verrucomicrobium
Vibrio alginolyticus	S	663	6402	0.07883	NA	NA	NA	NA	6402	0.07883	NA	NA	NA	NA	cellular&nbsp;organisms>Bacteria>Proteobacteria>Gammaproteobacteria>Vibrionales>Vibrionaceae>Vibrio>Vibrio&nbsp;harveyi&nbsp;group
Tenuifilum thalassicum	S	2590900	6392	0.0787	3874	0.0256	2489	0.01121	6392	0.0787	3007	0.03401	4652	0.06346	cellular&nbsp;organisms>Bacteria>FCB&nbsp;group>Bacteroidetes/Chlorobi&nbsp;group>Bacteroidetes>Bacteroidia>Bacteroidales>Tenuifilaceae>Tenuifilum
Ereboglobus luteus	S	1796921	5885	0.07842	2937	0.01941	3973	0.01789	5885	0.07246	NA	NA	5748	0.07842	cellular&nbsp;organisms>Bacteria>PVC&nbsp;group>Verrucomicrobia>Opitutae>Opitutales>Opitutaceae>Ereboglobus
Micrococcus luteus	S	1270	8233	0.07816	NA	NA	8233	0.03706	6065	0.07468	NA	NA	5729	0.07816	cellular&nbsp;organisms>Bacteria>Terrabacteria&nbsp;group>Actinobacteria>Actinomycetia>Micrococcales>Micrococcaceae>Micrococcus
Streptomyces sp. Rer75	S	2750011	5707	0.07786	NA	NA	NA	NA	NA	NA	NA	NA	5707	0.07786	cellular&nbsp;organisms>Bacteria>Terrabacteria&nbsp;group>Actinobacteria>Actinomycetia>Streptomycetales>Streptomycetaceae>Streptomyces>unclassified&nbsp;Streptomyces
Clostridium estertheticum	S	238834	6882	0.07783	2196	0.01451	1568	0.007059	2795	0.03441	6882	0.07783	2796	0.03814	cellular&nbsp;organisms>Bacteria>Terrabacteria&nbsp;group>Firmicutes>Clostridia>Eubacteriales>Clostridiaceae>Clostridium
Burkholderia ambifaria	S	152480	5702	0.07779	NA	NA	NA	NA	NA	NA	NA	NA	5702	0.07779	cellular&nbsp;organisms>Bacteria>Proteobacteria>Betaproteobacteria>Burkholderiales>Burkholderiaceae>Burkholderia>Burkholderia&nbsp;cepacia&nbsp;complex
Aeromonas veronii	S	654	5681	0.0775	2755	0.0182	3757	0.01691	5145	0.06335	3947	0.04464	5681	0.0775	cellular&nbsp;organisms>Bacteria>Proteobacteria>Gammaproteobacteria>Aeromonadales>Aeromonadaceae>Aeromonas
Pseudomonas psychrophila	S	122355	17203	0.07745	7409	0.04895	17203	0.07745	2274	0.028	6021	0.06809	NA	NA	cellular&nbsp;organisms>Bacteria>Proteobacteria>Gammaproteobacteria>Pseudomonadales>Pseudomonadaceae>Pseudomonas
Providencia rettgeri	S	587	6740	0.07623	3969	0.02622	3544	0.01596	4655	0.05732	6740	0.07623	4087	0.05576	cellular&nbsp;organisms>Bacteria>Proteobacteria>Gammaproteobacteria>Enterobacterales>Morganellaceae>Providencia
Sphingobacterium spiritivorum	S	258	6884	0.07614	5780	0.03819	6884	0.03099	6184	0.07614	5219	0.05902	5535	0.07551	cellular&nbsp;organisms>Bacteria>FCB&nbsp;group>Bacteroidetes/Chlorobi&nbsp;group>Bacteroidetes>Sphingobacteriia>Sphingobacteriales>Sphingobacteriaceae>Sphingobacterium
Lysinibacillus timonensis	S	2086577	11462	0.07573	11462	0.07573	6483	0.02919	1499	0.01846	2441	0.02761	NA	NA	cellular&nbsp;organisms>Bacteria>Terrabacteria&nbsp;group>Firmicutes>Bacilli>Bacillales>Bacillaceae>Lysinibacillus
Mucilaginibacter rubeus	S	2027860	6138	0.07557	4008	0.02648	3112	0.01401	6138	0.07557	3782	0.04277	4984	0.06799	cellular&nbsp;organisms>Bacteria>FCB&nbsp;group>Bacteroidetes/Chlorobi&nbsp;group>Bacteroidetes>Sphingobacteriia>Sphingobacteriales>Sphingobacteriaceae>Mucilaginibacter
Thermoanaerobacterium thermosaccharolyticum	S	1517	6681	0.07556	2509	0.01658	NA	NA	3750	0.04617	6681	0.07556	3298	0.04499	cellular&nbsp;organisms>Bacteria>Terrabacteria&nbsp;group>Firmicutes>Clostridia>Thermoanaerobacterales>Thermoanaerobacterales&nbsp;Family&nbsp;III.&nbsp;Incertae&nbsp;Sedis>Thermoanaerobacterium
Crassaminicella sp. SY095	S	2599308	6643	0.07513	2174	0.01436	1569	0.007064	3095	0.03811	6643	0.07513	2924	0.03989	cellular&nbsp;organisms>Bacteria>Terrabacteria&nbsp;group>Firmicutes>Clostridia>Eubacteriales>Clostridiaceae>Crassaminicella>unclassified&nbsp;Crassaminicella
Ruminiclostridium cellulolyticum	S	1521	6588	0.07451	1393	0.009204	1174	0.005285	2334	0.02874	6588	0.07451	2413	0.03292	cellular&nbsp;organisms>Bacteria>Terrabacteria&nbsp;group>Firmicutes>Clostridia>Eubacteriales>Oscillospiraceae>Ruminiclostridium
Spiroplasma culicicola	S	216935	6020	0.07412	NA	NA	NA	NA	6020	0.07412	NA	NA	NA	NA	cellular&nbsp;organisms>Bacteria>Terrabacteria&nbsp;group>Tenericutes>Mollicutes>Entomoplasmatales>Spiroplasmataceae>Spiroplasma
Corynebacterium doosanense	S	1121358	6012	0.07402	NA	NA	NA	NA	6012	0.07402	NA	NA	NA	NA	cellular&nbsp;organisms>Bacteria>Terrabacteria&nbsp;group>Actinobacteria>Actinomycetia>Corynebacteriales>Corynebacteriaceae>Corynebacterium
Sinorhizobium fredii	S	380	5749	0.07389	4636	0.03063	5749	0.02588	5722	0.07045	4059	0.04591	5416	0.07389	cellular&nbsp;organisms>Bacteria>Proteobacteria>Alphaproteobacteria>Hyphomicrobiales>Rhizobiaceae>Sinorhizobium/Ensifer&nbsp;group>Sinorhizobium>Sinorhizobium&nbsp;fredii&nbsp;group
Shewanella algae	S	38313	6521	0.07375	NA	NA	NA	NA	NA	NA	6521	0.07375	NA	NA	cellular&nbsp;organisms>Bacteria>Proteobacteria>Gammaproteobacteria>Alteromonadales>Shewanellaceae>Shewanella
Treponema brennaborense	S	81028	5572	0.07346	5572	0.03682	1593	0.007172	3755	0.04623	3664	0.04144	5385	0.07346	cellular&nbsp;organisms>Bacteria>Spirochaetes>Spirochaetia>Spirochaetales>Spirochaetaceae>Treponema
Megamonas funiformis	S	437897	6468	0.07315	2187	0.01445	1430	0.006438	2285	0.02813	6468	0.07315	3008	0.04104	cellular&nbsp;organisms>Bacteria>Terrabacteria&nbsp;group>Firmicutes>Negativicutes>Selenomonadales>Selenomonadaceae>Megamonas
Jeotgalibaca porci	S	1868793	6463	0.07309	4487	0.02965	1916	0.008626	NA	NA	6463	0.07309	1833	0.02501	cellular&nbsp;organisms>Bacteria>Terrabacteria&nbsp;group>Firmicutes>Bacilli>Lactobacillales>Carnobacteriaceae>Jeotgalibaca
Porphyromonas crevioricanis	S	393921	5928	0.07299	2942	0.01944	1296	0.005835	5928	0.07299	3225	0.03647	3642	0.04969	cellular&nbsp;organisms>Bacteria>FCB&nbsp;group>Bacteroidetes/Chlorobi&nbsp;group>Bacteroidetes>Bacteroidia>Bacteroidales>Porphyromonadaceae>Porphyromonas
Streptococcus pneumoniae	S	1313	5266	0.07184	3498	0.02311	4657	0.02097	4607	0.05672	4415	0.04993	5266	0.07184	cellular&nbsp;organisms>Bacteria>Terrabacteria&nbsp;group>Firmicutes>Bacilli>Lactobacillales>Streptococcaceae>Streptococcus
Clostridium argentinense	S	29341	6335	0.07165	2188	0.01446	2286	0.01029	2449	0.03015	6335	0.07165	2289	0.03123	cellular&nbsp;organisms>Bacteria>Terrabacteria&nbsp;group>Firmicutes>Clostridia>Eubacteriales>Clostridiaceae>Clostridium
Paeniclostridium sordellii	S	1505	6325	0.07153	1867	0.01234	1707	0.007685	2930	0.03608	6325	0.07153	2744	0.03743	cellular&nbsp;organisms>Bacteria>Terrabacteria&nbsp;group>Firmicutes>Clostridia>Eubacteriales>Peptostreptococcaceae>Paeniclostridium
Caproiciproducens sp. 7D4C2	S	2721621	5228	0.07132	2156	0.01425	2895	0.01303	4384	0.05398	2344	0.02651	5228	0.07132	cellular&nbsp;organisms>Bacteria>Terrabacteria&nbsp;group>Firmicutes>Clostridia>Eubacteriales>Oscillospiraceae>Caproiciproducens>unclassified&nbsp;Caproiciproducens
Chryseobacterium sp. NEB161	S	2724619	11164	0.07122	10779	0.07122	11164	0.05026	3224	0.0397	2273	0.02571	2679	0.03655	cellular&nbsp;organisms>Bacteria>FCB&nbsp;group>Bacteroidetes/Chlorobi&nbsp;group>Bacteroidetes>Flavobacteriia>Flavobacteriales>Weeksellaceae>Chryseobacterium&nbsp;group>Chryseobacterium>unclassified&nbsp;Chryseobacterium
Epilithonimonas vandammei	S	2487072	6751	0.07119	6751	0.04461	6500	0.02926	4440	0.05467	3050	0.03449	5218	0.07119	cellular&nbsp;organisms>Bacteria>FCB&nbsp;group>Bacteroidetes/Chlorobi&nbsp;group>Bacteroidetes>Flavobacteriia>Flavobacteriales>Weeksellaceae>Chryseobacterium&nbsp;group>Epilithonimonas
Petrocella atlantisensis	S	2173034	6295	0.07119	1521	0.01005	1255	0.00565	2194	0.02701	6295	0.07119	2392	0.03263	cellular&nbsp;organisms>Bacteria>Terrabacteria&nbsp;group>Firmicutes>Clostridia>Eubacteriales>Vallitaleaceae>Petrocella
Clostridium gasigenes	S	94869	6289	0.07113	3784	0.025	3630	0.01634	2258	0.0278	6289	0.07113	2170	0.0296	cellular&nbsp;organisms>Bacteria>Terrabacteria&nbsp;group>Firmicutes>Clostridia>Eubacteriales>Clostridiaceae>Clostridium
Enterococcus cecorum	S	44008	6261	0.07081	3226	0.02131	1753	0.007892	2513	0.03094	6261	0.07081	2559	0.03491	cellular&nbsp;organisms>Bacteria>Terrabacteria&nbsp;group>Firmicutes>Bacilli>Lactobacillales>Enterococcaceae>Enterococcus
Mycobacteroides abscessus	S	36809	6761	0.07076	6245	0.04126	6761	0.03044	5118	0.06302	NA	NA	5187	0.07076	cellular&nbsp;organisms>Bacteria>Terrabacteria&nbsp;group>Actinobacteria>Actinomycetia>Corynebacteriales>Mycobacteriaceae>Mycobacteroides
Pseudoalteromonas ulvae	S	107327	5186	0.07075	2257	0.01491	1868	0.00841	2903	0.03574	NA	NA	5186	0.07075	cellular&nbsp;organisms>Bacteria>Proteobacteria>Gammaproteobacteria>Alteromonadales>Pseudoalteromonadaceae>Pseudoalteromonas
Obesumbacterium proteus	S	82983	15693	0.07065	NA	NA	15693	0.07065	NA	NA	NA	NA	NA	NA	cellular&nbsp;organisms>Bacteria>Proteobacteria>Gammaproteobacteria>Enterobacterales>Hafniaceae>Obesumbacterium
Leuconostoc mesenteroides	S	1245	6239	0.07056	1476	0.009752	NA	NA	2984	0.03674	6239	0.07056	3588	0.04895	cellular&nbsp;organisms>Bacteria>Terrabacteria&nbsp;group>Firmicutes>Bacilli>Lactobacillales>Lactobacillaceae>Leuconostoc
Minicystis rosea	S	888845	5137	0.07008	2478	0.01637	3316	0.01493	4877	0.06005	NA	NA	5137	0.07008	cellular&nbsp;organisms>Bacteria>Proteobacteria>delta/epsilon&nbsp;subdivisions>Deltaproteobacteria>Myxococcales>Sorangiineae>Sorangiineae&nbsp;incertae&nbsp;sedis>Minicystis
Cloacibacillus porcorum	S	1197717	5669	0.0698	2677	0.01769	2952	0.01329	5669	0.0698	3904	0.04415	5108	0.06968	cellular&nbsp;organisms>Bacteria>Synergistetes>Synergistia>Synergistales>Synergistaceae>Cloacibacillus
Yersinia enterocolitica	S	630	15463	0.06961	3076	0.02032	15463	0.06961	NA	NA	3416	0.03863	NA	NA	cellular&nbsp;organisms>Bacteria>Proteobacteria>Gammaproteobacteria>Enterobacterales>Yersiniaceae>Yersinia
Trueperella pyogenes	S	1661	6151	0.06956	3753	0.0248	NA	NA	2693	0.03316	6151	0.06956	2501	0.03412	cellular&nbsp;organisms>Bacteria>Terrabacteria&nbsp;group>Actinobacteria>Actinomycetia>Actinomycetales>Actinomycetaceae>Trueperella
Rhizobium etli	S	29449	5098	0.06955	NA	NA	4600	0.02071	4772	0.05876	NA	NA	5098	0.06955	cellular&nbsp;organisms>Bacteria>Proteobacteria>Alphaproteobacteria>Hyphomicrobiales>Rhizobiaceae>Rhizobium/Agrobacterium&nbsp;group>Rhizobium
Clostridium drakei	S	332101	6100	0.06899	1526	0.01008	NA	NA	1957	0.0241	6100	0.06899	1879	0.02563	cellular&nbsp;organisms>Bacteria>Terrabacteria&nbsp;group>Firmicutes>Clostridia>Eubacteriales>Clostridiaceae>Clostridium
Parvimonas micra	S	33033	6088	0.06885	2393	0.01581	2290	0.01031	4065	0.05005	6088	0.06885	4238	0.05782	cellular&nbsp;organisms>Bacteria>Terrabacteria&nbsp;group>Firmicutes>Tissierellia>Tissierellales>Peptoniphilaceae>Parvimonas
Christensenella minuta	S	626937	5032	0.06865	2015	0.01331	2718	0.01224	3907	0.04811	2134	0.02413	5032	0.06865	cellular&nbsp;organisms>Bacteria>Terrabacteria&nbsp;group>Firmicutes>Clostridia>Eubacteriales>Christensenellaceae>Christensenella
Chryseobacterium sp. 3008163	S	2478663	10372	0.06853	10372	0.06853	6050	0.02724	1759	0.02166	1648	0.01864	2273	0.03101	cellular&nbsp;organisms>Bacteria>FCB&nbsp;group>Bacteroidetes/Chlorobi&nbsp;group>Bacteroidetes>Flavobacteriia>Flavobacteriales>Weeksellaceae>Chryseobacterium&nbsp;group>Chryseobacterium>unclassified&nbsp;Chryseobacterium
Chryseobacterium indologenes	S	253	10300	0.06805	10300	0.06805	7736	0.03483	4289	0.05281	5283	0.05975	4017	0.0548	cellular&nbsp;organisms>Bacteria>FCB&nbsp;group>Bacteroidetes/Chlorobi&nbsp;group>Bacteroidetes>Flavobacteriia>Flavobacteriales>Weeksellaceae>Chryseobacterium&nbsp;group>Chryseobacterium
Clostridium isatidis	S	182773	6004	0.0679	5151	0.03403	5277	0.02376	2799	0.03446	6004	0.0679	2957	0.04034	cellular&nbsp;organisms>Bacteria>Terrabacteria&nbsp;group>Firmicutes>Clostridia>Eubacteriales>Clostridiaceae>Clostridium
Gordonibacter urolithinfaciens	S	1335613	4947	0.06749	1800	0.01189	2923	0.01316	3674	0.04524	NA	NA	4947	0.06749	cellular&nbsp;organisms>Bacteria>Terrabacteria&nbsp;group>Actinobacteria>Coriobacteriia>Eggerthellales>Eggerthellaceae>Gordonibacter
Mycolicibacterium boenickei	S	146017	4911	0.067	NA	NA	NA	NA	NA	NA	NA	NA	4911	0.067	cellular&nbsp;organisms>Bacteria>Terrabacteria&nbsp;group>Actinobacteria>Actinomycetia>Corynebacteriales>Mycobacteriaceae>Mycolicibacterium
Bacteroides sp. HF-5141	S	2650158	5917	0.06692	3373	0.02229	NA	NA	4888	0.06018	5917	0.06692	3837	0.05235	cellular&nbsp;organisms>Bacteria>FCB&nbsp;group>Bacteroidetes/Chlorobi&nbsp;group>Bacteroidetes>Bacteroidia>Bacteroidales>Bacteroidaceae>Bacteroides>unclassified&nbsp;Bacteroides
Fusobacterium varium	S	856	5777	0.06534	2294	0.01516	1520	0.006843	1949	0.024	5777	0.06534	2285	0.03117	cellular&nbsp;organisms>Bacteria>Fusobacteria>Fusobacteriia>Fusobacteriales>Fusobacteriaceae>Fusobacterium
Serratia fonticola	S	47917	14494	0.06525	NA	NA	14494	0.06525	1460	0.01798	NA	NA	NA	NA	cellular&nbsp;organisms>Bacteria>Proteobacteria>Gammaproteobacteria>Enterobacterales>Yersiniaceae>Serratia
Zymomonas mobilis	S	542	5740	0.06492	NA	NA	NA	NA	NA	NA	5740	0.06492	1835	0.02503	cellular&nbsp;organisms>Bacteria>Proteobacteria>Alphaproteobacteria>Sphingomonadales>Sphingomonadaceae>Zymomonas
Ornithobacterium rhinotracheale	S	28251	9814	0.06484	9814	0.06484	9052	0.04075	3766	0.04637	2239	0.02532	3355	0.04577	cellular&nbsp;organisms>Bacteria>FCB&nbsp;group>Bacteroidetes/Chlorobi&nbsp;group>Bacteroidetes>Flavobacteriia>Flavobacteriales>Weeksellaceae>Ornithobacterium
Pseudomonas sp. R84	S	1573712	9777	0.0646	9777	0.0646	8902	0.04008	NA	NA	NA	NA	NA	NA	cellular&nbsp;organisms>Bacteria>Proteobacteria>Gammaproteobacteria>Pseudomonadales>Pseudomonadaceae>Pseudomonas>unclassified&nbsp;Pseudomonas
Bradyrhizobium erythrophlei	S	1437360	4718	0.06436	1808	0.01195	2752	0.01239	4020	0.0495	1826	0.02065	4718	0.06436	cellular&nbsp;organisms>Bacteria>Proteobacteria>Alphaproteobacteria>Hyphomicrobiales>Bradyrhizobiaceae>Bradyrhizobium
Elizabethkingia anophelis	S	1117645	9680	0.06396	9680	0.06396	7755	0.03491	4550	0.05602	4762	0.05386	3699	0.05046	cellular&nbsp;organisms>Bacteria>FCB&nbsp;group>Bacteroidetes/Chlorobi&nbsp;group>Bacteroidetes>Flavobacteriia>Flavobacteriales>Weeksellaceae>Elizabethkingia
Microbacterium hominis	S	162426	6865	0.06389	6865	0.04536	4712	0.02121	5033	0.06197	NA	NA	4683	0.06389	cellular&nbsp;organisms>Bacteria>Terrabacteria&nbsp;group>Actinobacteria>Actinomycetia>Micrococcales>Microbacteriaceae>Microbacterium
Mycoplasma anserisalpingitidis	S	519450	4670	0.06371	NA	NA	NA	NA	3187	0.03924	2597	0.02937	4670	0.06371	cellular&nbsp;organisms>Bacteria>Terrabacteria&nbsp;group>Tenericutes>Mollicutes>Mycoplasmatales>Mycoplasmataceae>Mycoplasma
Eggerthella sp. HF-1101	S	2690837	4669	0.0637	1771	0.0117	2573	0.01158	3704	0.04561	1512	0.0171	4669	0.0637	cellular&nbsp;organisms>Bacteria>Terrabacteria&nbsp;group>Actinobacteria>Coriobacteriia>Eggerthellales>Eggerthellaceae>Eggerthella>unclassified&nbsp;Eggerthella
Anaeromyxobacter dehalogenans	S	161493	5117	0.06368	2535	0.01675	3766	0.01695	5117	0.063	NA	NA	4668	0.06368	cellular&nbsp;organisms>Bacteria>Proteobacteria>delta/epsilon&nbsp;subdivisions>Deltaproteobacteria>Myxococcales>Cystobacterineae>Anaeromyxobacteraceae>Anaeromyxobacter
Campylobacter coli	S	195	5171	0.06367	NA	NA	NA	NA	5171	0.06367	2201	0.02489	NA	NA	cellular&nbsp;organisms>Bacteria>Proteobacteria>delta/epsilon&nbsp;subdivisions>Epsilonproteobacteria>Campylobacterales>Campylobacteraceae>Campylobacter
Rhizorhabdus dicambivorans	S	1850238	7187	0.06342	NA	NA	7187	0.03236	4917	0.06054	NA	NA	4649	0.06342	cellular&nbsp;organisms>Bacteria>Proteobacteria>Alphaproteobacteria>Sphingomonadales>Sphingomonadaceae>Rhizorhabdus
Parolsenella catena	S	2003188	4647	0.0634	2460	0.01625	2946	0.01326	4641	0.05714	NA	NA	4647	0.0634	cellular&nbsp;organisms>Bacteria>Terrabacteria&nbsp;group>Actinobacteria>Coriobacteriia>Coriobacteriales>Atopobiaceae>Parolsenella
Arabia massiliensis	S	1870985	4642	0.06333	1844	0.01218	2672	0.01203	3923	0.0483	1640	0.01855	4642	0.06333	cellular&nbsp;organisms>Bacteria>Terrabacteria&nbsp;group>Actinobacteria>Coriobacteriia>Eggerthellales>Eggerthellaceae>Arabia
Gemmatirosa kalamazoonesis	S	861299	4899	0.06314	2456	0.01623	3531	0.0159	4899	0.06032	NA	NA	4628	0.06314	cellular&nbsp;organisms>Bacteria>FCB&nbsp;group>Gemmatimonadetes>Gemmatimonadetes>Gemmatimonadales>Gemmatimonadaceae>Gemmatirosa
Capnocytophaga sp. oral taxon 323	S	1705617	4580	0.06248	NA	NA	NA	NA	NA	NA	NA	NA	4580	0.06248	cellular&nbsp;organisms>Bacteria>FCB&nbsp;group>Bacteroidetes/Chlorobi&nbsp;group>Bacteroidetes>Flavobacteriia>Flavobacteriales>Flavobacteriaceae>Capnocytophaga>unclassified&nbsp;Capnocytophaga
Klebsiella oxytoca	S	571	4994	0.06149	NA	NA	1757	0.00791	4994	0.06149	NA	NA	2737	0.03734	cellular&nbsp;organisms>Bacteria>Proteobacteria>Gammaproteobacteria>Enterobacterales>Enterobacteriaceae>Klebsiella
Burkholderia glumae	S	337	4505	0.06146	NA	NA	NA	NA	4264	0.0525	NA	NA	4505	0.06146	cellular&nbsp;organisms>Bacteria>Proteobacteria>Betaproteobacteria>Burkholderiales>Burkholderiaceae>Burkholderia
Lactobacillus johnsonii	S	33959	5411	0.0612	2272	0.01501	2958	0.01332	3279	0.04037	5411	0.0612	2815	0.0384	cellular&nbsp;organisms>Bacteria>Terrabacteria&nbsp;group>Firmicutes>Bacilli>Lactobacillales>Lactobacillaceae>Lactobacillus
Amycolatopsis mediterranei	S	33910	4471	0.06099	NA	NA	1906	0.008581	2258	0.0278	NA	NA	4471	0.06099	cellular&nbsp;organisms>Bacteria>Terrabacteria&nbsp;group>Actinobacteria>Actinomycetia>Pseudonocardiales>Pseudonocardiaceae>Amycolatopsis
Opitutus sp. GAS368	S	1882749	4952	0.06097	2490	0.01645	3110	0.014	4952	0.06097	NA	NA	3602	0.04914	cellular&nbsp;organisms>Bacteria>PVC&nbsp;group>Verrucomicrobia>Opitutae>Opitutales>Opitutaceae>Opitutus>unclassified&nbsp;Opitutus
Variovorax sp. PBS-H4	S	434008	4459	0.06083	NA	NA	NA	NA	3982	0.04903	NA	NA	4459	0.06083	cellular&nbsp;organisms>Bacteria>Proteobacteria>Betaproteobacteria>Burkholderiales>Comamonadaceae>Variovorax>unclassified&nbsp;Variovorax
Streptomyces griseus	S	1911	4510	0.06076	NA	NA	4343	0.01955	4510	0.05553	NA	NA	4454	0.06076	cellular&nbsp;organisms>Bacteria>Terrabacteria&nbsp;group>Actinobacteria>Actinomycetia>Streptomycetales>Streptomycetaceae>Streptomyces>Streptomyces&nbsp;griseus&nbsp;group>Streptomyces&nbsp;griseus&nbsp;subgroup
Mesoplasma florum	S	2151	4932	0.06073	NA	NA	NA	NA	4932	0.06073	3688	0.04171	NA	NA	cellular&nbsp;organisms>Bacteria>Terrabacteria&nbsp;group>Tenericutes>Mollicutes>Entomoplasmatales>Entomoplasmataceae>Mesoplasma
Pseudonocardia dioxanivorans	S	240495	5369	0.06072	NA	NA	2017	0.009081	2594	0.03194	5369	0.06072	2414	0.03293	cellular&nbsp;organisms>Bacteria>Terrabacteria&nbsp;group>Actinobacteria>Actinomycetia>Pseudonocardiales>Pseudonocardiaceae>Pseudonocardia
Rummeliibacillus stabekisii	S	241244	9147	0.06044	9147	0.06044	4537	0.02043	NA	NA	1552	0.01755	NA	NA	cellular&nbsp;organisms>Bacteria>Terrabacteria&nbsp;group>Firmicutes>Bacilli>Bacillales>Planococcaceae>Rummeliibacillus
Enterococcus faecalis	S	1351	5340	0.06039	3746	0.02475	4642	0.0209	3944	0.04856	5340	0.06039	3404	0.04644	cellular&nbsp;organisms>Bacteria>Terrabacteria&nbsp;group>Firmicutes>Bacilli>Lactobacillales>Enterococcaceae>Enterococcus
Clostridium acetobutylicum	S	1488	5317	0.06013	1854	0.01225	1447	0.006514	2791	0.03436	5317	0.06013	2467	0.03366	cellular&nbsp;organisms>Bacteria>Terrabacteria&nbsp;group>Firmicutes>Clostridia>Eubacteriales>Clostridiaceae>Clostridium
Rothia mucilaginosa	S	43675	5299	0.05993	NA	NA	NA	NA	1550	0.01908	5299	0.05993	NA	NA	cellular&nbsp;organisms>Bacteria>Terrabacteria&nbsp;group>Actinobacteria>Actinomycetia>Micrococcales>Micrococcaceae>Rothia
Actinomyces radicidentis	S	111015	4857	0.0598	NA	NA	4145	0.01866	4857	0.0598	NA	NA	2930	0.03997	cellular&nbsp;organisms>Bacteria>Terrabacteria&nbsp;group>Actinobacteria>Actinomycetia>Actinomycetales>Actinomycetaceae>Actinomyces
Myroides phaeus	S	702745	10818	0.0596	9021	0.0596	10818	0.0487	2726	0.03356	2962	0.0335	NA	NA	cellular&nbsp;organisms>Bacteria>FCB&nbsp;group>Bacteroidetes/Chlorobi&nbsp;group>Bacteroidetes>Flavobacteriia>Flavobacteriales>Flavobacteriaceae>Myroides
Flavobacterium haoranii	S	683124	13204	0.05944	8813	0.05823	13204	0.05944	1801	0.02217	3362	0.03802	2272	0.031	cellular&nbsp;organisms>Bacteria>FCB&nbsp;group>Bacteroidetes/Chlorobi&nbsp;group>Bacteroidetes>Flavobacteriia>Flavobacteriales>Flavobacteriaceae>Flavobacterium
Vibrio parahaemolyticus	S	670	4349	0.05933	3174	0.02097	3196	0.01439	3794	0.04671	2639	0.02985	4349	0.05933	cellular&nbsp;organisms>Bacteria>Proteobacteria>Gammaproteobacteria>Vibrionales>Vibrionaceae>Vibrio>Vibrio&nbsp;harveyi&nbsp;group
Opitutus terrae	S	107709	4506	0.05926	2419	0.01598	3041	0.01369	4506	0.05548	NA	NA	4344	0.05926	cellular&nbsp;organisms>Bacteria>PVC&nbsp;group>Verrucomicrobia>Opitutae>Opitutales>Opitutaceae>Opitutus
Alkalitalea saponilacus	S	889453	5227	0.05911	2646	0.01748	1807	0.008135	4427	0.05451	5227	0.05911	3339	0.04555	cellular&nbsp;organisms>Bacteria>FCB&nbsp;group>Bacteroidetes/Chlorobi&nbsp;group>Bacteroidetes>Bacteroidia>Marinilabiliales>Marinilabiliaceae>Alkalitalea
Methylobacterium aquaticum	S	270351	4980	0.05911	4646	0.0307	4980	0.02242	3883	0.04781	NA	NA	4333	0.05911	cellular&nbsp;organisms>Bacteria>Proteobacteria>Alphaproteobacteria>Hyphomicrobiales>Methylobacteriaceae>Methylobacterium
Clostridium tyrobutyricum	S	1519	5222	0.05906	2960	0.01956	1659	0.007469	2046	0.02519	5222	0.05906	2206	0.03009	cellular&nbsp;organisms>Bacteria>Terrabacteria&nbsp;group>Firmicutes>Clostridia>Eubacteriales>Clostridiaceae>Clostridium
Cupriavidus necator	S	106590	4583	0.05904	2274	0.01502	2827	0.01273	4583	0.05643	NA	NA	4328	0.05904	cellular&nbsp;organisms>Bacteria>Proteobacteria>Betaproteobacteria>Burkholderiales>Burkholderiaceae>Cupriavidus
Clostridium intestinale	S	36845	5212	0.05895	2865	0.01893	2581	0.01162	3429	0.04222	5212	0.05895	2987	0.04075	cellular&nbsp;organisms>Bacteria>Terrabacteria&nbsp;group>Firmicutes>Clostridia>Eubacteriales>Clostridiaceae>Clostridium
Chitinophaga sp. MD30	S	2033437	4787	0.05894	2679	0.0177	NA	NA	4787	0.05894	3426	0.03875	3838	0.05236	cellular&nbsp;organisms>Bacteria>FCB&nbsp;group>Bacteroidetes/Chlorobi&nbsp;group>Bacteroidetes>Chitinophagia>Chitinophagales>Chitinophagaceae>Chitinophaga>unclassified&nbsp;Chitinophaga
Luteolibacter luteus	S	2728835	4775	0.05879	3485	0.02303	3268	0.01471	4775	0.05879	1380	0.01561	3821	0.05213	cellular&nbsp;organisms>Bacteria>PVC&nbsp;group>Verrucomicrobia>Verrucomicrobiae>Verrucomicrobiales>Verrucomicrobiaceae>Luteolibacter
Mammaliicoccus lentus	S	42858	5195	0.05875	1906	0.01259	NA	NA	NA	NA	5195	0.05875	NA	NA	cellular&nbsp;organisms>Bacteria>Terrabacteria&nbsp;group>Firmicutes>Bacilli>Bacillales>Staphylococcaceae>Mammaliicoccus
Capnocytophaga canimorsus	S	28188	6345	0.05864	5899	0.03898	6345	0.02857	4763	0.05864	4593	0.05194	3440	0.04693	cellular&nbsp;organisms>Bacteria>FCB&nbsp;group>Bacteroidetes/Chlorobi&nbsp;group>Bacteroidetes>Flavobacteriia>Flavobacteriales>Flavobacteriaceae>Capnocytophaga
Sphingobacterium thalpophilum	S	259	4759	0.0586	1906	0.01259	1721	0.007748	4759	0.0586	2701	0.03055	3645	0.04973	cellular&nbsp;organisms>Bacteria>FCB&nbsp;group>Bacteroidetes/Chlorobi&nbsp;group>Bacteroidetes>Sphingobacteriia>Sphingobacteriales>Sphingobacteriaceae>Sphingobacterium
Gordonia terrae	S	2055	4748	0.05846	NA	NA	NA	NA	4748	0.05846	NA	NA	4250	0.05798	cellular&nbsp;organisms>Bacteria>Terrabacteria&nbsp;group>Actinobacteria>Actinomycetia>Corynebacteriales>Gordoniaceae>Gordonia
Pseudomonas brassicacearum	S	930166	5126	0.05797	NA	NA	NA	NA	NA	NA	5126	0.05797	NA	NA	cellular&nbsp;organisms>Bacteria>Proteobacteria>Gammaproteobacteria>Pseudomonadales>Pseudomonadaceae>Pseudomonas
Limosilactobacillus fermentum	S	1613	5124	0.05795	1892	0.0125	NA	NA	NA	NA	5124	0.05795	NA	NA	cellular&nbsp;organisms>Bacteria>Terrabacteria&nbsp;group>Firmicutes>Bacilli>Lactobacillales>Lactobacillaceae>Limosilactobacillus
Lacunisphaera limnophila	S	1838286	4242	0.05787	2516	0.01662	2470	0.01112	4017	0.04946	NA	NA	4242	0.05787	cellular&nbsp;organisms>Bacteria>PVC&nbsp;group>Verrucomicrobia>Opitutae>Opitutales>Opitutaceae>Lacunisphaera
Staphylococcus haemolyticus	S	1283	5114	0.05784	2461	0.01626	1677	0.00755	3107	0.03826	5114	0.05784	2430	0.03315	cellular&nbsp;organisms>Bacteria>Terrabacteria&nbsp;group>Firmicutes>Bacilli>Bacillales>Staphylococcaceae>Staphylococcus
Streptococcus pyogenes	S	1314	5099	0.05767	3409	0.02252	NA	NA	3646	0.04489	5099	0.05767	3042	0.0415	cellular&nbsp;organisms>Bacteria>Terrabacteria&nbsp;group>Firmicutes>Bacilli>Lactobacillales>Streptococcaceae>Streptococcus
Fusobacterium pseudoperiodonticum	S	2663009	5084	0.0575	2460	0.01625	2074	0.009337	3161	0.03892	5084	0.0575	2601	0.03548	cellular&nbsp;organisms>Bacteria>Fusobacteria>Fusobacteriia>Fusobacteriales>Fusobacteriaceae>Fusobacterium
Corynebacterium xerosis	S	1725	4642	0.05716	NA	NA	NA	NA	4642	0.05716	NA	NA	NA	NA	cellular&nbsp;organisms>Bacteria>Terrabacteria&nbsp;group>Actinobacteria>Actinomycetia>Corynebacteriales>Corynebacteriaceae>Corynebacterium
Clavibacter michiganensis	S	28447	4555	0.05713	4417	0.02918	3967	0.01786	4555	0.05608	NA	NA	4188	0.05713	cellular&nbsp;organisms>Bacteria>Terrabacteria&nbsp;group>Actinobacteria>Actinomycetia>Micrococcales>Microbacteriaceae>Clavibacter
Streptomyces chartreusis	S	1969	5690	0.05707	5690	0.0376	3648	0.01642	4482	0.05518	NA	NA	4183	0.05707	cellular&nbsp;organisms>Bacteria>Terrabacteria&nbsp;group>Actinobacteria>Actinomycetia>Streptomycetales>Streptomycetaceae>Streptomyces
Chryseobacterium gleum	S	250	8297	0.05694	8297	0.05482	5631	0.02535	3874	0.0477	5035	0.05694	3529	0.04814	cellular&nbsp;organisms>Bacteria>FCB&nbsp;group>Bacteroidetes/Chlorobi&nbsp;group>Bacteroidetes>Flavobacteriia>Flavobacteriales>Weeksellaceae>Chryseobacterium&nbsp;group>Chryseobacterium
Tistrella mobilis	S	171437	4624	0.05693	1756	0.0116	1873	0.008432	4624	0.05693	NA	NA	4093	0.05584	cellular&nbsp;organisms>Bacteria>Proteobacteria>Alphaproteobacteria>Rhodospirillales>Rhodospirillaceae>Tistrella
Olsenella timonensis	S	1805478	4490	0.05687	2320	0.01533	2777	0.0125	4490	0.05528	NA	NA	4169	0.05687	cellular&nbsp;organisms>Bacteria>Terrabacteria&nbsp;group>Actinobacteria>Coriobacteriia>Coriobacteriales>Atopobiaceae>Olsenella
Clostridium carboxidivorans	S	217159	5023	0.05681	2216	0.01464	1407	0.006334	2256	0.02778	5023	0.05681	2037	0.02779	cellular&nbsp;organisms>Bacteria>Terrabacteria&nbsp;group>Firmicutes>Clostridia>Eubacteriales>Clostridiaceae>Clostridium
Filifactor alocis	S	143361	5003	0.05658	1530	0.01011	NA	NA	2788	0.03433	5003	0.05658	2737	0.03734	cellular&nbsp;organisms>Bacteria>Terrabacteria&nbsp;group>Firmicutes>Clostridia>Eubacteriales>Peptostreptococcaceae>Filifactor
Sedimentibacter sp. zth1	S	2816908	5003	0.05658	1515	0.01001	1589	0.007154	2344	0.02886	5003	0.05658	2613	0.03565	cellular&nbsp;organisms>Bacteria>Terrabacteria&nbsp;group>Firmicutes>Tissierellia>Tissierellia&nbsp;incertae&nbsp;sedis>Sedimentibacter>unclassified&nbsp;Sedimentibacter
Labilibaculum antarcticum	S	1717717	4993	0.05647	3577	0.02363	2608	0.01174	4087	0.05032	4993	0.05647	2871	0.03917	cellular&nbsp;organisms>Bacteria>FCB&nbsp;group>Bacteroidetes/Chlorobi&nbsp;group>Bacteroidetes>Bacteroidia>Marinilabiliales>Marinifilaceae>Labilibaculum
Klebsiella michiganensis	S	1134687	4138	0.05645	NA	NA	2800	0.01261	3421	0.04212	NA	NA	4138	0.05645	cellular&nbsp;organisms>Bacteria>Proteobacteria>Gammaproteobacteria>Enterobacterales>Enterobacteriaceae>Klebsiella
Syntrophotalea acetylenica	S	29542	4574	0.05632	NA	NA	NA	NA	4574	0.05632	NA	NA	2456	0.03351	cellular&nbsp;organisms>Bacteria>Proteobacteria>delta/epsilon&nbsp;subdivisions>Deltaproteobacteria>Desulfuromonadales>Syntrophotaleaceae>Syntrophotalea
Mycoplasma hominis	S	2098	4574	0.05632	NA	NA	NA	NA	4574	0.05632	4165	0.0471	NA	NA	cellular&nbsp;organisms>Bacteria>Terrabacteria&nbsp;group>Tenericutes>Mollicutes>Mycoplasmatales>Mycoplasmataceae>Mycoplasma
Nostoc linckia	S	92942	4976	0.05628	NA	NA	NA	NA	NA	NA	4976	0.05628	NA	NA	cellular&nbsp;organisms>Bacteria>Terrabacteria&nbsp;group>Cyanobacteria/Melainabacteria&nbsp;group>Cyanobacteria>Nostocales>Nostocaceae>Nostoc
Geosporobacter ferrireducens	S	1424294	4968	0.05619	1864	0.01232	1409	0.006343	2309	0.02843	4968	0.05619	2221	0.0303	cellular&nbsp;organisms>Bacteria>Terrabacteria&nbsp;group>Firmicutes>Clostridia>Eubacteriales>Clostridiaceae>Geosporobacter
Paenibacillus sp. B01	S	2660554	4104	0.05599	3284	0.0217	2563	0.01154	3993	0.04916	NA	NA	4104	0.05599	cellular&nbsp;organisms>Bacteria>Terrabacteria&nbsp;group>Firmicutes>Bacilli>Bacillales>Paenibacillaceae>Paenibacillus>unclassified&nbsp;Paenibacillus
Chryseobacterium bernardetii	S	1241978	8466	0.05594	8466	0.05594	6344	0.02856	4435	0.05461	4084	0.04619	3668	0.05004	cellular&nbsp;organisms>Bacteria>FCB&nbsp;group>Bacteroidetes/Chlorobi&nbsp;group>Bacteroidetes>Flavobacteriia>Flavobacteriales>Weeksellaceae>Chryseobacterium&nbsp;group>Chryseobacterium
Rhizobium phaseoli	S	396	4533	0.05581	NA	NA	NA	NA	4533	0.05581	NA	NA	NA	NA	cellular&nbsp;organisms>Bacteria>Proteobacteria>Alphaproteobacteria>Hyphomicrobiales>Rhizobiaceae>Rhizobium/Agrobacterium&nbsp;group>Rhizobium
Streptococcus infantarius	S	102684	8441	0.05577	8441	0.05577	NA	NA	NA	NA	NA	NA	NA	NA	cellular&nbsp;organisms>Bacteria>Terrabacteria&nbsp;group>Firmicutes>Bacilli>Lactobacillales>Streptococcaceae>Streptococcus
Chitinophaga sp. XS-30	S	2604421	4518	0.05563	2585	0.01708	2989	0.01346	4518	0.05563	2526	0.02857	3748	0.05113	cellular&nbsp;organisms>Bacteria>FCB&nbsp;group>Bacteroidetes/Chlorobi&nbsp;group>Bacteroidetes>Chitinophagia>Chitinophagales>Chitinophagaceae>Chitinophaga>unclassified&nbsp;Chitinophaga
Parolsenella massiliensis	S	1871022	4201	0.05562	2253	0.01489	2535	0.01141	4201	0.05173	NA	NA	4077	0.05562	cellular&nbsp;organisms>Bacteria>Terrabacteria&nbsp;group>Actinobacteria>Coriobacteriia>Coriobacteriales>Atopobiaceae>Parolsenella
Caloramator sp. E03	S	2576307	4916	0.0556	1528	0.0101	1230	0.005537	3151	0.0388	4916	0.0556	2864	0.03907	cellular&nbsp;organisms>Bacteria>Terrabacteria&nbsp;group>Firmicutes>Clostridia>Eubacteriales>Clostridiaceae>Caloramator>unclassified&nbsp;Caloramator
Aquisphaera giovannonii	S	406548	4103	0.05544	2272	0.01501	3344	0.01505	4103	0.05052	NA	NA	4064	0.05544	cellular&nbsp;organisms>Bacteria>PVC&nbsp;group>Planctomycetes>Planctomycetia>Isosphaerales>Isosphaeraceae>Aquisphaera
Selenomonas sp. Marseille-Q3039	S	2754044	4060	0.05539	2410	0.01592	2624	0.01181	3991	0.04914	NA	NA	4060	0.05539	cellular&nbsp;organisms>Bacteria>Terrabacteria&nbsp;group>Firmicutes>Negativicutes>Selenomonadales>Selenomonadaceae>Selenomonas>unclassified&nbsp;Selenomonas
Streptomyces niveus	S	193462	4620	0.05526	4620	0.03053	3271	0.01473	3916	0.04822	NA	NA	4051	0.05526	cellular&nbsp;organisms>Bacteria>Terrabacteria&nbsp;group>Actinobacteria>Actinomycetia>Streptomycetales>Streptomycetaceae>Streptomyces
Clostridium taeniosporum	S	394958	4885	0.05525	2587	0.01709	2084	0.009382	2053	0.02528	4885	0.05525	2123	0.02896	cellular&nbsp;organisms>Bacteria>Terrabacteria&nbsp;group>Firmicutes>Clostridia>Eubacteriales>Clostridiaceae>Clostridium
Microbacterium sp. No. 7	S	1714373	4179	0.05524	NA	NA	4179	0.01881	3278	0.04036	NA	NA	4049	0.05524	cellular&nbsp;organisms>Bacteria>Terrabacteria&nbsp;group>Actinobacteria>Actinomycetia>Micrococcales>Microbacteriaceae>Microbacterium>unclassified&nbsp;Microbacterium
Lysinibacillus sp. YS11	S	2072025	8347	0.05515	8347	0.05515	4777	0.02151	NA	NA	NA	NA	NA	NA	cellular&nbsp;organisms>Bacteria>Terrabacteria&nbsp;group>Firmicutes>Bacilli>Bacillales>Bacillaceae>Lysinibacillus>unclassified&nbsp;Lysinibacillus
Capnocytophaga sputigena	S	1019	4463	0.05505	3334	0.02203	1905	0.008576	4463	0.05495	3961	0.0448	4035	0.05505	cellular&nbsp;organisms>Bacteria>FCB&nbsp;group>Bacteroidetes/Chlorobi&nbsp;group>Bacteroidetes>Flavobacteriia>Flavobacteriales>Flavobacteriaceae>Capnocytophaga
Delftia acidovorans	S	80866	6996	0.05502	NA	NA	6996	0.0315	4469	0.05502	NA	NA	NA	NA	cellular&nbsp;organisms>Bacteria>Proteobacteria>Betaproteobacteria>Burkholderiales>Comamonadaceae>Delftia
Planctomyces sp. SH-PL62	S	1636152	4149	0.05496	1899	0.01255	2751	0.01238	4149	0.05108	NA	NA	4029	0.05496	cellular&nbsp;organisms>Bacteria>PVC&nbsp;group>Planctomycetes>Planctomycetia>Planctomycetales>Planctomycetaceae>Planctomyces>unclassified&nbsp;Planctomyces
Stenotrophomonas acidaminiphila	S	128780	4005	0.05464	NA	NA	NA	NA	NA	NA	NA	NA	4005	0.05464	cellular&nbsp;organisms>Bacteria>Proteobacteria>Gammaproteobacteria>Xanthomonadales>Xanthomonadaceae>Stenotrophomonas
Corallococcus coralloides	S	184914	4418	0.0544	2715	0.01794	2967	0.01336	4418	0.0544	NA	NA	3937	0.05371	cellular&nbsp;organisms>Bacteria>Proteobacteria>delta/epsilon&nbsp;subdivisions>Deltaproteobacteria>Myxococcales>Cystobacterineae>Myxococcaceae>Corallococcus
Nocardia brasiliensis	S	37326	3980	0.0543	3627	0.02396	3367	0.01516	3831	0.04717	NA	NA	3980	0.0543	cellular&nbsp;organisms>Bacteria>Terrabacteria&nbsp;group>Actinobacteria>Actinomycetia>Corynebacteriales>Nocardiaceae>Nocardia
Pseudomonas taetrolens	S	47884	11968	0.05388	6150	0.04063	11968	0.05388	2346	0.02889	1223	0.01383	NA	NA	cellular&nbsp;organisms>Bacteria>Proteobacteria>Gammaproteobacteria>Pseudomonadales>Pseudomonadaceae>Pseudomonas
Veillonella parvula	S	29466	4740	0.05361	2102	0.01389	NA	NA	2937	0.03616	4740	0.05361	3113	0.04247	cellular&nbsp;organisms>Bacteria>Terrabacteria&nbsp;group>Firmicutes>Negativicutes>Veillonellales>Veillonellaceae>Veillonella
Mycolicibacterium gilvum	S	1804	4334	0.05336	NA	NA	NA	NA	4334	0.05336	NA	NA	2587	0.03529	cellular&nbsp;organisms>Bacteria>Terrabacteria&nbsp;group>Actinobacteria>Actinomycetia>Corynebacteriales>Mycobacteriaceae>Mycolicibacterium
Thermoanaerobacter kivui	S	2325	4669	0.0528	NA	NA	NA	NA	NA	NA	4669	0.0528	NA	NA	cellular&nbsp;organisms>Bacteria>Terrabacteria&nbsp;group>Firmicutes>Clostridia>Thermoanaerobacterales>Thermoanaerobacteraceae>Thermoanaerobacter
Urechidicola croceus	S	1850246	8881	0.05279	7990	0.05279	8881	0.03998	1964	0.02418	2311	0.02614	2963	0.04042	cellular&nbsp;organisms>Bacteria>FCB&nbsp;group>Bacteroidetes/Chlorobi&nbsp;group>Bacteroidetes>Flavobacteriia>Flavobacteriales>Flavobacteriaceae>Urechidicola
Megasphaera stantonii	S	2144175	3852	0.05255	1957	0.01293	1746	0.00786	3092	0.03807	2309	0.02611	3852	0.05255	cellular&nbsp;organisms>Bacteria>Terrabacteria&nbsp;group>Firmicutes>Negativicutes>Veillonellales>Veillonellaceae>Megasphaera
Clostridium sp. JN-1	S	2483110	4640	0.05248	1396	0.009224	NA	NA	1827	0.0225	4640	0.05248	1982	0.02704	cellular&nbsp;organisms>Bacteria>Terrabacteria&nbsp;group>Firmicutes>Clostridia>Eubacteriales>Clostridiaceae>Clostridium>unclassified&nbsp;Clostridium
Ureibacillus thermosphaericus	S	51173	7929	0.05239	7929	0.05239	4917	0.02214	NA	NA	2565	0.02901	2178	0.02971	cellular&nbsp;organisms>Bacteria>Terrabacteria&nbsp;group>Firmicutes>Bacilli>Bacillales>Planococcaceae>Ureibacillus
Streptomyces sp. ZYC-3	S	2797636	5447	0.05226	NA	NA	5447	0.02452	2705	0.03331	NA	NA	3831	0.05226	cellular&nbsp;organisms>Bacteria>Terrabacteria&nbsp;group>Actinobacteria>Actinomycetia>Streptomycetales>Streptomycetaceae>Streptomyces>unclassified&nbsp;Streptomyces
Halothermothrix orenii	S	31909	4610	0.05214	1305	0.008622	NA	NA	NA	NA	4610	0.05214	NA	NA	cellular&nbsp;organisms>Bacteria>Terrabacteria&nbsp;group>Firmicutes>Clostridia>Halanaerobiales>Halanaerobiaceae>Halothermothrix
Mammaliicoccus sciuri	S	1296	4603	0.05206	3874	0.0256	2812	0.01266	3008	0.03704	4603	0.05206	2548	0.03476	cellular&nbsp;organisms>Bacteria>Terrabacteria&nbsp;group>Firmicutes>Bacilli>Bacillales>Staphylococcaceae>Mammaliicoccus
Staphylococcus epidermidis	S	1282	4590	0.05191	2677	0.01769	2383	0.01073	3218	0.03962	4590	0.05191	2792	0.03809	cellular&nbsp;organisms>Bacteria>Terrabacteria&nbsp;group>Firmicutes>Bacilli>Bacillales>Staphylococcaceae>Staphylococcus
Ligilactobacillus agilis	S	1601	4587	0.05188	NA	NA	NA	NA	NA	NA	4587	0.05188	1411	0.01925	cellular&nbsp;organisms>Bacteria>Terrabacteria&nbsp;group>Firmicutes>Bacilli>Lactobacillales>Lactobacillaceae>Ligilactobacillus
Chryseobacterium taklimakanense	S	536441	4105	0.05184	4105	0.02712	2027	0.009126	3951	0.04865	2322	0.02626	3800	0.05184	cellular&nbsp;organisms>Bacteria>FCB&nbsp;group>Bacteroidetes/Chlorobi&nbsp;group>Bacteroidetes>Flavobacteriia>Flavobacteriales>Weeksellaceae>Chryseobacterium&nbsp;group>Planobacterium
Lactobacillus sp. 3B(2020)	S	2695882	4583	0.05183	NA	NA	NA	NA	NA	NA	4583	0.05183	NA	NA	cellular&nbsp;organisms>Bacteria>Terrabacteria&nbsp;group>Firmicutes>Bacilli>Lactobacillales>Lactobacillaceae>Lactobacillus>unclassified&nbsp;Lactobacillus
Romboutsia sp. CE17	S	2724150	4576	0.05175	1719	0.01136	1898	0.008545	3464	0.04265	4576	0.05175	2336	0.03187	cellular&nbsp;organisms>Bacteria>Terrabacteria&nbsp;group>Firmicutes>Clostridia>Eubacteriales>Peptostreptococcaceae>Romboutsia>unclassified&nbsp;Romboutsia
Pseudoalteromonas spongiae	S	298657	4568	0.05166	NA	NA	NA	NA	NA	NA	4568	0.05166	NA	NA	cellular&nbsp;organisms>Bacteria>Proteobacteria>Gammaproteobacteria>Alteromonadales>Pseudoalteromonadaceae>Pseudoalteromonas
Urbifossiella limnaea	S	2528023	3934	0.05166	1737	0.01148	2586	0.01164	3934	0.04844	NA	NA	3787	0.05166	cellular&nbsp;organisms>Bacteria>PVC&nbsp;group>Planctomycetes>Planctomycetia>Gemmatales>Gemmataceae>Urbifossiella
Lactococcus garvieae	S	1363	4565	0.05163	2094	0.01384	1927	0.008675	3330	0.041	4565	0.05163	3367	0.04593	cellular&nbsp;organisms>Bacteria>Terrabacteria&nbsp;group>Firmicutes>Bacilli>Lactobacillales>Streptococcaceae>Lactococcus
Burkholderia ubonensis	S	101571	3784	0.05162	NA	NA	NA	NA	3655	0.045	NA	NA	3784	0.05162	cellular&nbsp;organisms>Bacteria>Proteobacteria>Betaproteobacteria>Burkholderiales>Burkholderiaceae>Burkholderia>Burkholderia&nbsp;cepacia&nbsp;complex
Cloacibacterium normanense	S	237258	7803	0.05156	7803	0.05156	5251	0.02364	1352	0.01665	NA	NA	1403	0.01914	cellular&nbsp;organisms>Bacteria>FCB&nbsp;group>Bacteroidetes/Chlorobi&nbsp;group>Bacteroidetes>Flavobacteriia>Flavobacteriales>Weeksellaceae>Cloacibacterium
Bacillus circulans	S	1397	5156	0.05151	5156	0.03407	2996	0.01349	2845	0.03503	4555	0.05151	2636	0.03596	cellular&nbsp;organisms>Bacteria>Terrabacteria&nbsp;group>Firmicutes>Bacilli>Bacillales>Bacillaceae>Bacillus
Paludisphaera borealis	S	1387353	3766	0.05138	1666	0.01101	2261	0.01018	3633	0.04473	NA	NA	3766	0.05138	cellular&nbsp;organisms>Bacteria>PVC&nbsp;group>Planctomycetes>Planctomycetia>Isosphaerales>Isosphaeraceae>Paludisphaera
Capnocytophaga gingivalis	S	1017	4171	0.05136	3542	0.0234	1732	0.007797	4171	0.05136	3768	0.04261	3606	0.04919	cellular&nbsp;organisms>Bacteria>FCB&nbsp;group>Bacteroidetes/Chlorobi&nbsp;group>Bacteroidetes>Flavobacteriia>Flavobacteriales>Flavobacteriaceae>Capnocytophaga
Myxococcus xanthus	S	34	3762	0.05132	3172	0.02096	2632	0.01185	3601	0.04434	NA	NA	3762	0.05132	cellular&nbsp;organisms>Bacteria>Proteobacteria>delta/epsilon&nbsp;subdivisions>Deltaproteobacteria>Myxococcales>Cystobacterineae>Myxococcaceae>Myxococcus
Chryseobacterium shandongense	S	1493872	7756	0.05125	7756	0.05125	6757	0.03042	3003	0.03697	2033	0.02299	2882	0.03932	cellular&nbsp;organisms>Bacteria>FCB&nbsp;group>Bacteroidetes/Chlorobi&nbsp;group>Bacteroidetes>Flavobacteriia>Flavobacteriales>Weeksellaceae>Chryseobacterium&nbsp;group>Chryseobacterium
Clostridium septicum	S	1504	4532	0.05125	2787	0.01841	2457	0.01106	1882	0.02317	4532	0.05125	1915	0.02612	cellular&nbsp;organisms>Bacteria>Terrabacteria&nbsp;group>Firmicutes>Clostridia>Eubacteriales>Clostridiaceae>Clostridium
Miniimonas sp. S16	S	2171623	4153	0.05124	NA	NA	NA	NA	4153	0.05113	NA	NA	3756	0.05124	cellular&nbsp;organisms>Bacteria>Terrabacteria&nbsp;group>Actinobacteria>Actinomycetia>Micrococcales>Beutenbergiaceae>Miniimonas>unclassified&nbsp;Miniimonas
Vibrio sp. EJY3	S	1116375	4528	0.05121	NA	NA	NA	NA	NA	NA	4528	0.05121	NA	NA	cellular&nbsp;organisms>Bacteria>Proteobacteria>Gammaproteobacteria>Vibrionales>Vibrionaceae>Vibrio>unclassified&nbsp;Vibrio
Acetivibrio saccincola	S	1677857	4528	0.05121	2057	0.01359	1749	0.007874	2528	0.03113	4528	0.05121	2628	0.03585	cellular&nbsp;organisms>Bacteria>Terrabacteria&nbsp;group>Firmicutes>Clostridia>Eubacteriales>Oscillospiraceae>Acetivibrio
Peptoniphilus harei	S	54005	4523	0.05115	1752	0.01158	1410	0.006348	2759	0.03397	4523	0.05115	3226	0.04401	cellular&nbsp;organisms>Bacteria>Terrabacteria&nbsp;group>Firmicutes>Tissierellia>Tissierellales>Peptoniphilaceae>Peptoniphilus
Capnocytophaga sp. oral taxon 878	S	1316596	4731	0.05113	4731	0.03126	4636	0.02087	4153	0.05113	2681	0.03032	2094	0.02857	cellular&nbsp;organisms>Bacteria>FCB&nbsp;group>Bacteroidetes/Chlorobi&nbsp;group>Bacteroidetes>Flavobacteriia>Flavobacteriales>Flavobacteriaceae>Capnocytophaga>unclassified&nbsp;Capnocytophaga
Achromobacter spanius	S	217203	3739	0.05101	1540	0.01018	2017	0.009081	2841	0.03498	NA	NA	3739	0.05101	cellular&nbsp;organisms>Bacteria>Proteobacteria>Betaproteobacteria>Burkholderiales>Alcaligenaceae>Achromobacter
Pseudoclostridium thermosuccinogenes	S	84032	4098	0.05101	1970	0.01302	2313	0.01041	3153	0.03882	4098	0.04635	3739	0.05101	cellular&nbsp;organisms>Bacteria>Terrabacteria&nbsp;group>Firmicutes>Clostridia>Eubacteriales>Oscillospiraceae>Pseudoclostridium
Roseimicrobium sp. ORNL1	S	2711231	4116	0.05068	2658	0.01756	2801	0.01261	4116	0.05068	NA	NA	3611	0.04926	cellular&nbsp;organisms>Bacteria>PVC&nbsp;group>Verrucomicrobia>Verrucomicrobiae>Verrucomicrobiales>Verrucomicrobiaceae>Roseimicrobium>unclassified&nbsp;Roseimicrobium
Achromobacter sp. AONIH1	S	1758194	3710	0.05061	NA	NA	NA	NA	3318	0.04085	NA	NA	3710	0.05061	cellular&nbsp;organisms>Bacteria>Proteobacteria>Betaproteobacteria>Burkholderiales>Alcaligenaceae>Achromobacter>unclassified&nbsp;Achromobacter
Nocardia cyriacigeorgica	S	135487	3706	0.05056	3239	0.0214	2937	0.01322	3529	0.04345	NA	NA	3706	0.05056	cellular&nbsp;organisms>Bacteria>Terrabacteria&nbsp;group>Actinobacteria>Actinomycetia>Corynebacteriales>Nocardiaceae>Nocardia
Psychrobacter sp. P11F6	S	1699621	11229	0.05055	3411	0.02254	11229	0.05055	NA	NA	NA	NA	NA	NA	cellular&nbsp;organisms>Bacteria>Proteobacteria>Gammaproteobacteria>Pseudomonadales>Moraxellaceae>Psychrobacter>unclassified&nbsp;Psychrobacter
Hymenobacter sp. APR13	S	1356852	3761	0.0503	2604	0.01721	3698	0.01665	3761	0.04631	NA	NA	3687	0.0503	cellular&nbsp;organisms>Bacteria>FCB&nbsp;group>Bacteroidetes/Chlorobi&nbsp;group>Bacteroidetes>Cytophagia>Cytophagales>Hymenobacteraceae>Hymenobacter>unclassified&nbsp;Hymenobacter
Streptococcus oralis	S	1303	4081	0.05025	1676	0.01107	3648	0.01642	4081	0.05025	3676	0.04157	3647	0.04975	cellular&nbsp;organisms>Bacteria>Terrabacteria&nbsp;group>Firmicutes>Bacilli>Lactobacillales>Streptococcaceae>Streptococcus
Chryseolinea soli	S	2321403	3932	0.05023	2210	0.0146	1474	0.006636	3932	0.04841	1544	0.01746	3682	0.05023	cellular&nbsp;organisms>Bacteria>FCB&nbsp;group>Bacteroidetes/Chlorobi&nbsp;group>Bacteroidetes>Cytophagia>Cytophagales>Fulvivirgaceae>Chryseolinea
Leuconostoc gelidum	S	1244	6423	0.05005	NA	NA	6423	0.02892	4065	0.05005	2247	0.02541	NA	NA	cellular&nbsp;organisms>Bacteria>Terrabacteria&nbsp;group>Firmicutes>Bacilli>Lactobacillales>Lactobacillaceae>Leuconostoc
Nostoc sp. C052	S	2576902	4056	0.04994	NA	NA	NA	NA	4056	0.04994	NA	NA	NA	NA	cellular&nbsp;organisms>Bacteria>Terrabacteria&nbsp;group>Cyanobacteria/Melainabacteria&nbsp;group>Cyanobacteria>Nostocales>Nostocaceae>Nostoc>unclassified&nbsp;Nostoc
Arthrobacter crystallopoietes	S	37928	3655	0.04986	NA	NA	3454	0.01555	3352	0.04127	NA	NA	3655	0.04986	cellular&nbsp;organisms>Bacteria>Terrabacteria&nbsp;group>Actinobacteria>Actinomycetia>Micrococcales>Micrococcaceae>Arthrobacter
Sarcina sp. JB2	S	2726954	4406	0.04983	2283	0.01508	1885	0.008486	2459	0.03028	4406	0.04983	2054	0.02802	cellular&nbsp;organisms>Bacteria>Terrabacteria&nbsp;group>Firmicutes>Clostridia>Eubacteriales>Clostridiaceae>Sarcina>unclassified&nbsp;Sarcina
Sphaerospermopsis kisseleviana	S	289435	4370	0.04977	NA	NA	NA	NA	3106	0.03824	4370	0.04942	3648	0.04977	cellular&nbsp;organisms>Bacteria>Terrabacteria&nbsp;group>Cyanobacteria/Melainabacteria&nbsp;group>Cyanobacteria>Nostocales>Aphanizomenonaceae>Sphaerospermopsis
Acetivibrio thermocellus	S	1515	4399	0.04975	2859	0.01889	1986	0.008941	3397	0.04183	4399	0.04975	3245	0.04427	cellular&nbsp;organisms>Bacteria>Terrabacteria&nbsp;group>Firmicutes>Clostridia>Eubacteriales>Oscillospiraceae>Acetivibrio
Acidaminococcus intestini	S	187327	3646	0.04974	1711	0.01131	1261	0.005677	2702	0.03327	2132	0.02411	3646	0.04974	cellular&nbsp;organisms>Bacteria>Terrabacteria&nbsp;group>Firmicutes>Negativicutes>Acidaminococcales>Acidaminococcaceae>Acidaminococcus
Anaerococcus mediterraneensis	S	1870984	4385	0.04959	NA	NA	NA	NA	2633	0.03242	4385	0.04959	2724	0.03716	cellular&nbsp;organisms>Bacteria>Terrabacteria&nbsp;group>Firmicutes>Tissierellia>Tissierellales>Peptoniphilaceae>Anaerococcus
Fusobacterium ulcerans	S	861	4369	0.04941	2011	0.01329	2043	0.009198	2175	0.02678	4369	0.04941	2170	0.0296	cellular&nbsp;organisms>Bacteria>Fusobacteria>Fusobacteriia>Fusobacteriales>Fusobacteriaceae>Fusobacterium
Cupriavidus basilensis	S	68895	3760	0.04933	2051	0.01355	2041	0.009189	3760	0.0463	NA	NA	3616	0.04933	cellular&nbsp;organisms>Bacteria>Proteobacteria>Betaproteobacteria>Burkholderiales>Burkholderiaceae>Cupriavidus
Sandaracinus amylolyticus	S	927083	4004	0.0493	2061	0.01362	2682	0.01207	4004	0.0493	NA	NA	3311	0.04517	cellular&nbsp;organisms>Bacteria>Proteobacteria>delta/epsilon&nbsp;subdivisions>Deltaproteobacteria>Myxococcales>Sorangiineae>Sandaracinaceae>Sandaracinus
Brevibacterium aurantiacum	S	273384	3998	0.04923	NA	NA	NA	NA	3998	0.04923	NA	NA	NA	NA	cellular&nbsp;organisms>Bacteria>Terrabacteria&nbsp;group>Actinobacteria>Actinomycetia>Micrococcales>Brevibacteriaceae>Brevibacterium
Clostridium tetani	S	1513	4349	0.04919	2149	0.0142	2472	0.01113	2085	0.02567	4349	0.04919	2079	0.02836	cellular&nbsp;organisms>Bacteria>Terrabacteria&nbsp;group>Firmicutes>Clostridia>Eubacteriales>Clostridiaceae>Clostridium
Muricauda sp. 501str8	S	2698672	3598	0.04908	NA	NA	NA	NA	2962	0.03647	1656	0.01873	3598	0.04908	cellular&nbsp;organisms>Bacteria>FCB&nbsp;group>Bacteroidetes/Chlorobi&nbsp;group>Bacteroidetes>Flavobacteriia>Flavobacteriales>Flavobacteriaceae>Muricauda>unclassified&nbsp;Muricauda
Myroides odoratus	S	256	10561	0.04904	7422	0.04904	10561	0.04755	2764	0.03403	3091	0.03496	3053	0.04165	cellular&nbsp;organisms>Bacteria>FCB&nbsp;group>Bacteroidetes/Chlorobi&nbsp;group>Bacteroidetes>Flavobacteriia>Flavobacteriales>Flavobacteriaceae>Myroides
Bordetella genomosp. 13	S	463040	3982	0.04903	NA	NA	NA	NA	3982	0.04903	NA	NA	NA	NA	cellular&nbsp;organisms>Bacteria>Proteobacteria>Betaproteobacteria>Burkholderiales>Alcaligenaceae>Bordetella
Methylorubrum extorquens	S	408	3977	0.04897	NA	NA	3130	0.01409	3977	0.04897	NA	NA	3401	0.0464	cellular&nbsp;organisms>Bacteria>Proteobacteria>Alphaproteobacteria>Hyphomicrobiales>Methylobacteriaceae>Methylorubrum
Streptococcus thermophilus	S	1308	7394	0.04885	7394	0.04885	NA	NA	2802	0.0345	2812	0.0318	2112	0.02881	cellular&nbsp;organisms>Bacteria>Terrabacteria&nbsp;group>Firmicutes>Bacilli>Lactobacillales>Streptococcaceae>Streptococcus
Mesorhizobium sp. M1E.F.Ca.ET.045.02.1.1	S	2493672	3966	0.04883	NA	NA	NA	NA	3966	0.04883	NA	NA	NA	NA	cellular&nbsp;organisms>Bacteria>Proteobacteria>Alphaproteobacteria>Hyphomicrobiales>Phyllobacteriaceae>Mesorhizobium>unclassified&nbsp;Mesorhizobium
Streptococcus sanguinis	S	1305	4316	0.04881	1498	0.009898	NA	NA	2075	0.02555	4316	0.04881	1948	0.02658	cellular&nbsp;organisms>Bacteria>Terrabacteria&nbsp;group>Firmicutes>Bacilli>Lactobacillales>Streptococcaceae>Streptococcus
Alteromonas macleodii	S	28108	4334	0.0488	4053	0.02678	4334	0.01951	2620	0.03226	4242	0.04798	3577	0.0488	cellular&nbsp;organisms>Bacteria>Proteobacteria>Gammaproteobacteria>Alteromonadales>Alteromonadaceae>Alteromonas
Leptotrichia wadei	S	157687	4314	0.04879	2773	0.01832	NA	NA	2901	0.03572	4314	0.04879	2700	0.03683	cellular&nbsp;organisms>Bacteria>Fusobacteria>Fusobacteriia>Fusobacteriales>Leptotrichiaceae>Leptotrichia
Clostridium fermenticellae	S	2068654	4307	0.04871	1197	0.007909	NA	NA	2227	0.02742	4307	0.04871	1858	0.02535	cellular&nbsp;organisms>Bacteria>Terrabacteria&nbsp;group>Firmicutes>Clostridia>Eubacteriales>Clostridiaceae>Clostridium
Anaeromyxobacter sp. Fw109-5	S	404589	3567	0.04866	1892	0.0125	2422	0.0109	3505	0.04316	NA	NA	3567	0.04866	cellular&nbsp;organisms>Bacteria>Proteobacteria>delta/epsilon&nbsp;subdivisions>Deltaproteobacteria>Myxococcales>Cystobacterineae>Anaeromyxobacteraceae>Anaeromyxobacter>unclassified&nbsp;Anaeromyxobacter
Bordetella sp. N	S	1746199	3565	0.04863	NA	NA	NA	NA	1677	0.02065	NA	NA	3565	0.04863	cellular&nbsp;organisms>Bacteria>Proteobacteria>Betaproteobacteria>Burkholderiales>Alcaligenaceae>Bordetella>unclassified&nbsp;Bordetella
Tenacibaculum jejuense	S	584609	7631	0.04862	7358	0.04862	7631	0.03435	1618	0.01992	1791	0.02026	1255	0.01712	cellular&nbsp;organisms>Bacteria>FCB&nbsp;group>Bacteroidetes/Chlorobi&nbsp;group>Bacteroidetes>Flavobacteriia>Flavobacteriales>Flavobacteriaceae>Tenacibaculum
Sporosarcina ureae	S	1571	7356	0.0486	7356	0.0486	5428	0.02444	3627	0.04466	4007	0.04532	3432	0.04682	cellular&nbsp;organisms>Bacteria>Terrabacteria&nbsp;group>Firmicutes>Bacilli>Bacillales>Planococcaceae>Sporosarcina
Mycolicibacterium litorale	S	758802	4372	0.04859	NA	NA	4372	0.01968	3758	0.04627	NA	NA	3562	0.04859	cellular&nbsp;organisms>Bacteria>Terrabacteria&nbsp;group>Actinobacteria>Actinomycetia>Corynebacteriales>Mycobacteriaceae>Mycolicibacterium
Flavobacterium sp. KBS0721	S	1179672	7339	0.04849	7339	0.04849	5849	0.02633	1448	0.01783	2331	0.02636	NA	NA	cellular&nbsp;organisms>Bacteria>FCB&nbsp;group>Bacteroidetes/Chlorobi&nbsp;group>Bacteroidetes>Flavobacteriia>Flavobacteriales>Flavobacteriaceae>Flavobacterium>unclassified&nbsp;Flavobacterium
Cereibacter sphaeroides	S	1063	6502	0.04848	2775	0.01834	6502	0.02927	3670	0.04519	NA	NA	3554	0.04848	cellular&nbsp;organisms>Bacteria>Proteobacteria>Alphaproteobacteria>Rhodobacterales>Rhodobacteraceae>Cereibacter
Aminipila butyrica	S	433296	3795	0.04848	1782	0.01177	2144	0.009652	3491	0.04298	3795	0.04292	3554	0.04848	cellular&nbsp;organisms>Bacteria>Terrabacteria&nbsp;group>Firmicutes>Clostridia>Eubacteriales>Eubacteriales&nbsp;incertae&nbsp;sedis>Clostridiales&nbsp;Family&nbsp;XIII.&nbsp;Incertae&nbsp;Sedis>Aminipila
Burkholderia gladioli	S	28095	3795	0.04846	3070	0.02028	2723	0.01226	3795	0.04673	NA	NA	3552	0.04846	cellular&nbsp;organisms>Bacteria>Proteobacteria>Betaproteobacteria>Burkholderiales>Burkholderiaceae>Burkholderia
Haliscomenobacter hydrossis	S	2350	3742	0.04844	1908	0.01261	1600	0.007203	3742	0.04607	1813	0.0205	3551	0.04844	cellular&nbsp;organisms>Bacteria>FCB&nbsp;group>Bacteroidetes/Chlorobi&nbsp;group>Bacteroidetes>Saprospiria>Saprospirales>Haliscomenobacteraceae>Haliscomenobacter
Sphingopyxis macrogoltabida	S	33050	3541	0.04831	NA	NA	NA	NA	3222	0.03967	NA	NA	3541	0.04831	cellular&nbsp;organisms>Bacteria>Proteobacteria>Alphaproteobacteria>Sphingomonadales>Sphingomonadaceae>Sphingopyxis
Olsenella sp. GAM18	S	2109685	3536	0.04824	1717	0.01134	2031	0.009144	2846	0.03504	2709	0.03064	3536	0.04824	cellular&nbsp;organisms>Bacteria>Terrabacteria&nbsp;group>Actinobacteria>Coriobacteriia>Coriobacteriales>Atopobiaceae>Olsenella>unclassified&nbsp;Olsenella
Calothrix parasitica	S	1973486	4241	0.0482	4241	0.02802	2157	0.009711	3813	0.04695	2520	0.0285	3533	0.0482	cellular&nbsp;organisms>Bacteria>Terrabacteria&nbsp;group>Cyanobacteria/Melainabacteria&nbsp;group>Cyanobacteria>Nostocales>Calotrichaceae>Calothrix
Streptomyces spectabilis	S	68270	3523	0.04806	NA	NA	2823	0.01271	3066	0.03775	NA	NA	3523	0.04806	cellular&nbsp;organisms>Bacteria>Terrabacteria&nbsp;group>Actinobacteria>Actinomycetia>Streptomycetales>Streptomycetaceae>Streptomyces
Virgibacillus halodenitrificans	S	1482	4240	0.04795	3838	0.02536	NA	NA	NA	NA	4240	0.04795	NA	NA	cellular&nbsp;organisms>Bacteria>Terrabacteria&nbsp;group>Firmicutes>Bacilli>Bacillales>Bacillaceae>Virgibacillus
Bifidobacterium breve	S	1685	3821	0.04794	NA	NA	2318	0.01044	3821	0.04705	NA	NA	3514	0.04794	cellular&nbsp;organisms>Bacteria>Terrabacteria&nbsp;group>Actinobacteria>Actinomycetia>Bifidobacteriales>Bifidobacteriaceae>Bifidobacterium
Acidaminococcus fermentans	S	905	3503	0.04779	1689	0.01116	1619	0.007289	2637	0.03247	2025	0.0229	3503	0.04779	cellular&nbsp;organisms>Bacteria>Terrabacteria&nbsp;group>Firmicutes>Negativicutes>Acidaminococcales>Acidaminococcaceae>Acidaminococcus
Limnoglobus roseus	S	2598579	3501	0.04776	1690	0.01117	2457	0.01106	3385	0.04168	NA	NA	3501	0.04776	cellular&nbsp;organisms>Bacteria>PVC&nbsp;group>Planctomycetes>Planctomycetia>Gemmatales>Gemmataceae>Limnoglobus
Nostoc sphaeroides	S	446679	3862	0.04755	NA	NA	NA	NA	3862	0.04755	3275	0.03704	NA	NA	cellular&nbsp;organisms>Bacteria>Terrabacteria&nbsp;group>Cyanobacteria/Melainabacteria&nbsp;group>Cyanobacteria>Nostocales>Nostocaceae>Nostoc
Chryseobacterium glaciei	S	1685010	7188	0.04749	7188	0.04749	5678	0.02556	NA	NA	1523	0.01722	NA	NA	cellular&nbsp;organisms>Bacteria>FCB&nbsp;group>Bacteroidetes/Chlorobi&nbsp;group>Bacteroidetes>Flavobacteriia>Flavobacteriales>Weeksellaceae>Chryseobacterium&nbsp;group>Chryseobacterium
Clostridium chauvoei	S	46867	4356	0.0474	4356	0.02878	2587	0.01165	2125	0.02616	4191	0.0474	2345	0.03199	cellular&nbsp;organisms>Bacteria>Terrabacteria&nbsp;group>Firmicutes>Clostridia>Eubacteriales>Clostridiaceae>Clostridium
Spiroplasma turonicum	S	216946	4185	0.04733	NA	NA	NA	NA	NA	NA	4185	0.04733	NA	NA	cellular&nbsp;organisms>Bacteria>Terrabacteria&nbsp;group>Tenericutes>Mollicutes>Entomoplasmatales>Spiroplasmataceae>Spiroplasma
Alcaligenes faecalis	S	511	3877	0.04727	2311	0.01527	3877	0.01745	3339	0.04111	3124	0.03533	3465	0.04727	cellular&nbsp;organisms>Bacteria>Proteobacteria>Betaproteobacteria>Burkholderiales>Alcaligenaceae>Alcaligenes
Draconibacterium orientale	S	1168034	3833	0.04719	2731	0.01804	1868	0.00841	3833	0.04719	2882	0.03259	3071	0.0419	cellular&nbsp;organisms>Bacteria>FCB&nbsp;group>Bacteroidetes/Chlorobi&nbsp;group>Bacteroidetes>Bacteroidia>Marinilabiliales>Prolixibacteraceae>Draconibacterium
Bacillus pumilus	S	1408	4882	0.04718	4882	0.03226	2656	0.01196	2502	0.03081	4172	0.04718	2472	0.03372	cellular&nbsp;organisms>Bacteria>Terrabacteria&nbsp;group>Firmicutes>Bacilli>Bacillales>Bacillaceae>Bacillus
Phaeobacter inhibens	S	221822	7130	0.04711	7130	0.04711	NA	NA	NA	NA	NA	NA	NA	NA	cellular&nbsp;organisms>Bacteria>Proteobacteria>Alphaproteobacteria>Rhodobacterales>Rhodobacteraceae>Phaeobacter
Campylobacter concisus	S	199	4779	0.04707	4779	0.03158	4682	0.02108	3823	0.04707	3444	0.03895	2638	0.03599	cellular&nbsp;organisms>Bacteria>Proteobacteria>delta/epsilon&nbsp;subdivisions>Epsilonproteobacteria>Campylobacterales>Campylobacteraceae>Campylobacter
Xanthomonas campestris	S	339	4997	0.04705	4866	0.03215	4997	0.0225	1832	0.02256	NA	NA	3449	0.04705	cellular&nbsp;organisms>Bacteria>Proteobacteria>Gammaproteobacteria>Xanthomonadales>Xanthomonadaceae>Xanthomonas
Helicobacter pylori	S	210	3803	0.04682	2805	0.01853	3691	0.01662	3803	0.04682	3765	0.04258	3345	0.04563	cellular&nbsp;organisms>Bacteria>Proteobacteria>delta/epsilon&nbsp;subdivisions>Epsilonproteobacteria>Campylobacterales>Helicobacteraceae>Helicobacter
Thermoclostridium stercorarium	S	1510	3803	0.04682	1722	0.01138	2203	0.009918	3803	0.04682	3259	0.03686	3182	0.04341	cellular&nbsp;organisms>Bacteria>Terrabacteria&nbsp;group>Firmicutes>Clostridia>Eubacteriales>Oscillospiraceae>Thermoclostridium
Erysipelothrix rhusiopathiae	S	1648	3693	0.04678	1967	0.013	NA	NA	3590	0.0442	3693	0.04177	3429	0.04678	cellular&nbsp;organisms>Bacteria>Terrabacteria&nbsp;group>Firmicutes>Erysipelotrichia>Erysipelotrichales>Erysipelotrichaceae>Erysipelothrix
Azospirillum lipoferum	S	193	3794	0.04671	2275	0.01503	2946	0.01326	3794	0.04671	NA	NA	3166	0.04319	cellular&nbsp;organisms>Bacteria>Proteobacteria>Alphaproteobacteria>Rhodospirillales>Rhodospirillaceae>Azospirillum
Aliarcobacter cryaerophilus	S	28198	4902	0.04646	3898	0.02576	4902	0.02207	3773	0.04646	3630	0.04105	2031	0.02771	cellular&nbsp;organisms>Bacteria>Proteobacteria>delta/epsilon&nbsp;subdivisions>Epsilonproteobacteria>Campylobacterales>Campylobacteraceae>Arcobacter&nbsp;group>Aliarcobacter
Acetoanaerobium sticklandii	S	1511	4106	0.04644	1321	0.008728	1189	0.005353	2082	0.02563	4106	0.04644	2215	0.03022	cellular&nbsp;organisms>Bacteria>Terrabacteria&nbsp;group>Firmicutes>Clostridia>Eubacteriales>Peptostreptococcaceae>Acetoanaerobium
Chryseobacterium nakagawai	S	1241982	7021	0.04639	7021	0.04639	5320	0.02395	NA	NA	NA	NA	NA	NA	cellular&nbsp;organisms>Bacteria>FCB&nbsp;group>Bacteroidetes/Chlorobi&nbsp;group>Bacteroidetes>Flavobacteriia>Flavobacteriales>Weeksellaceae>Chryseobacterium&nbsp;group>Chryseobacterium
Megasphaera elsdenii	S	907	3490	0.04637	2202	0.01455	2079	0.00936	3490	0.04297	2429	0.02747	3399	0.04637	cellular&nbsp;organisms>Bacteria>Terrabacteria&nbsp;group>Firmicutes>Negativicutes>Veillonellales>Veillonellaceae>Megasphaera
Labilithrix luteola	S	1391654	3603	0.04626	1847	0.0122	2508	0.01129	3603	0.04436	NA	NA	3391	0.04626	cellular&nbsp;organisms>Bacteria>Proteobacteria>delta/epsilon&nbsp;subdivisions>Deltaproteobacteria>Myxococcales>Sorangiineae>Labilitrichaceae>Labilithrix
Draconibacterium sp. M1	S	2706887	3755	0.04623	3227	0.02132	1690	0.007608	3755	0.04623	2826	0.03196	2297	0.03134	cellular&nbsp;organisms>Bacteria>FCB&nbsp;group>Bacteroidetes/Chlorobi&nbsp;group>Bacteroidetes>Bacteroidia>Marinilabiliales>Prolixibacteraceae>Draconibacterium>unclassified&nbsp;Draconibacterium
Microbacterium foliorum	S	104336	3384	0.04617	NA	NA	2535	0.01141	2983	0.03673	NA	NA	3384	0.04617	cellular&nbsp;organisms>Bacteria>Terrabacteria&nbsp;group>Actinobacteria>Actinomycetia>Micrococcales>Microbacteriaceae>Microbacterium
Thauera sp. MZ1T	S	85643	3742	0.04607	NA	NA	NA	NA	3742	0.04607	NA	NA	NA	NA	cellular&nbsp;organisms>Bacteria>Proteobacteria>Betaproteobacteria>Rhodocyclales>Zoogloeaceae>Thauera>unclassified&nbsp;Thauera
Candidatus Solibacter usitatus	S	332163	3731	0.04597	1896	0.01253	2476	0.01115	3731	0.04594	NA	NA	3370	0.04597	cellular&nbsp;organisms>Bacteria>Acidobacteria>Acidobacteriia>Bryobacterales>Solibacteraceae>Candidatus&nbsp;Solibacter
Propionibacterium freudenreichii	S	1744	3364	0.04589	NA	NA	NA	NA	3285	0.04045	NA	NA	3364	0.04589	cellular&nbsp;organisms>Bacteria>Terrabacteria&nbsp;group>Actinobacteria>Actinomycetia>Propionibacteriales>Propionibacteriaceae>Propionibacterium
Megamonas hypermegale	S	158847	4052	0.04583	1531	0.01012	NA	NA	1960	0.02413	4052	0.04583	2829	0.03859	cellular&nbsp;organisms>Bacteria>Terrabacteria&nbsp;group>Firmicutes>Negativicutes>Selenomonadales>Selenomonadaceae>Megamonas
Lysobacter enzymogenes	S	69	3707	0.04572	2056	0.01358	2582	0.01162	3707	0.04564	NA	NA	3351	0.04572	cellular&nbsp;organisms>Bacteria>Proteobacteria>Gammaproteobacteria>Xanthomonadales>Xanthomonadaceae>Lysobacter
Morganella morganii	S	582	10153	0.04571	2313	0.01528	10153	0.04571	2379	0.02929	1592	0.018	2769	0.03778	cellular&nbsp;organisms>Bacteria>Proteobacteria>Gammaproteobacteria>Enterobacterales>Morganellaceae>Morganella
Pseudobacter ginsenosidimutans	S	661488	3712	0.0457	2392	0.0158	1392	0.006267	3712	0.0457	1977	0.02236	2888	0.0394	cellular&nbsp;organisms>Bacteria>FCB&nbsp;group>Bacteroidetes/Chlorobi&nbsp;group>Bacteroidetes>Chitinophagia>Chitinophagales>Chitinophagaceae>Pseudobacter
Haemophilus parainfluenzae	S	729	4037	0.04566	2170	0.01434	2691	0.01211	2575	0.0317	4037	0.04566	3129	0.04269	cellular&nbsp;organisms>Bacteria>Proteobacteria>Gammaproteobacteria>Pasteurellales>Pasteurellaceae>Haemophilus
Dickeya zeae	S	204042	3346	0.04565	NA	NA	3103	0.01397	3129	0.03853	2518	0.02848	3346	0.04565	cellular&nbsp;organisms>Bacteria>Proteobacteria>Gammaproteobacteria>Enterobacterales>Pectobacteriaceae>Dickeya
Bifidobacterium animalis	S	28025	3706	0.04563	NA	NA	NA	NA	3706	0.04563	NA	NA	3071	0.0419	cellular&nbsp;organisms>Bacteria>Terrabacteria&nbsp;group>Actinobacteria>Actinomycetia>Bifidobacteriales>Bifidobacteriaceae>Bifidobacterium
Flavobacterium anhuiense	S	459526	7784	0.0456	6901	0.0456	7784	0.03504	2291	0.02821	2217	0.02507	2329	0.03177	cellular&nbsp;organisms>Bacteria>FCB&nbsp;group>Bacteroidetes/Chlorobi&nbsp;group>Bacteroidetes>Flavobacteriia>Flavobacteriales>Flavobacteriaceae>Flavobacterium
Celeribacter indicus	S	1208324	3340	0.04557	NA	NA	NA	NA	2368	0.02916	NA	NA	3340	0.04557	cellular&nbsp;organisms>Bacteria>Proteobacteria>Alphaproteobacteria>Rhodobacterales>Rhodobacteraceae>Celeribacter
Tenacibaculum mesophilum	S	104268	6863	0.04535	6863	0.04535	6549	0.02948	NA	NA	NA	NA	NA	NA	cellular&nbsp;organisms>Bacteria>FCB&nbsp;group>Bacteroidetes/Chlorobi&nbsp;group>Bacteroidetes>Flavobacteriia>Flavobacteriales>Flavobacteriaceae>Tenacibaculum
Brachyspira pilosicoli	S	52584	4010	0.04535	2458	0.01624	NA	NA	1893	0.02331	4010	0.04535	1735	0.02367	cellular&nbsp;organisms>Bacteria>Spirochaetes>Spirochaetia>Brachyspirales>Brachyspiraceae>Brachyspira
Streptomyces sp. RTd22	S	1841249	3676	0.04526	NA	NA	NA	NA	3676	0.04526	NA	NA	NA	NA	cellular&nbsp;organisms>Bacteria>Terrabacteria&nbsp;group>Actinobacteria>Actinomycetia>Streptomycetales>Streptomycetaceae>Streptomyces>unclassified&nbsp;Streptomyces
Bifidobacterium choerinum	S	35760	3443	0.04522	3223	0.0213	3153	0.01419	3443	0.04239	NA	NA	3315	0.04522	cellular&nbsp;organisms>Bacteria>Terrabacteria&nbsp;group>Actinobacteria>Actinomycetia>Bifidobacteriales>Bifidobacteriaceae>Bifidobacterium
Riemerella anatipestifer	S	34085	6843	0.04521	6843	0.04521	5329	0.02399	2459	0.03028	2469	0.02792	2076	0.02832	cellular&nbsp;organisms>Bacteria>FCB&nbsp;group>Bacteroidetes/Chlorobi&nbsp;group>Bacteroidetes>Flavobacteriia>Flavobacteriales>Weeksellaceae>Riemerella
Pontibacter actiniarum	S	323450	3440	0.04518	2163	0.01429	1684	0.007581	3440	0.04236	1821	0.02059	3312	0.04518	cellular&nbsp;organisms>Bacteria>FCB&nbsp;group>Bacteroidetes/Chlorobi&nbsp;group>Bacteroidetes>Cytophagia>Cytophagales>Hymenobacteraceae>Pontibacter
Streptomyces sp. CMB-StM0423	S	2059884	3658	0.04504	NA	NA	NA	NA	3658	0.04504	NA	NA	NA	NA	cellular&nbsp;organisms>Bacteria>Terrabacteria&nbsp;group>Actinobacteria>Actinomycetia>Streptomycetales>Streptomycetaceae>Streptomyces>unclassified&nbsp;Streptomyces
Pseudomonas mendocina	S	300	3387	0.04501	1834	0.01212	1889	0.008504	3387	0.0417	NA	NA	3299	0.04501	cellular&nbsp;organisms>Bacteria>Proteobacteria>Gammaproteobacteria>Pseudomonadales>Pseudomonadaceae>Pseudomonas>Pseudomonas&nbsp;aeruginosa&nbsp;group
Pseudonocardia sp. HH130630-07	S	1690815	3537	0.04492	NA	NA	2846	0.01281	3537	0.04355	NA	NA	3293	0.04492	cellular&nbsp;organisms>Bacteria>Terrabacteria&nbsp;group>Actinobacteria>Actinomycetia>Pseudonocardiales>Pseudonocardiaceae>Pseudonocardia>unclassified&nbsp;Pseudonocardia
Clostridium scatologenes	S	1548	3970	0.0449	NA	NA	NA	NA	NA	NA	3970	0.0449	1531	0.02089	cellular&nbsp;organisms>Bacteria>Terrabacteria&nbsp;group>Firmicutes>Clostridia>Eubacteriales>Clostridiaceae>Clostridium
Pelosinus sp. UFO1	S	484770	3970	0.0449	1129	0.00746	NA	NA	1685	0.02075	3970	0.0449	1952	0.02663	cellular&nbsp;organisms>Bacteria>Terrabacteria&nbsp;group>Firmicutes>Negativicutes>Selenomonadales>Sporomusaceae>Pelosinus>unclassified&nbsp;Pelosinus
Acidovorax avenae	S	80867	3284	0.0448	2125	0.01404	2959	0.01332	3147	0.03875	NA	NA	3284	0.0448	cellular&nbsp;organisms>Bacteria>Proteobacteria>Betaproteobacteria>Burkholderiales>Comamonadaceae>Acidovorax
Acetobacter aceti	S	435	3279	0.04473	NA	NA	NA	NA	3098	0.03814	NA	NA	3279	0.04473	cellular&nbsp;organisms>Bacteria>Proteobacteria>Alphaproteobacteria>Rhodospirillales>Acetobacteraceae>Acetobacter>Acetobacter&nbsp;subgen.&nbsp;Acetobacter
Streptomyces tsukubensis	S	83656	3630	0.04469	3588	0.02371	2592	0.01167	3630	0.04469	NA	NA	2941	0.04012	cellular&nbsp;organisms>Bacteria>Terrabacteria&nbsp;group>Actinobacteria>Actinomycetia>Streptomycetales>Streptomycetaceae>Streptomyces
Pontibacter russatus	S	2694929	3625	0.04463	1938	0.0128	1294	0.005826	3625	0.04463	2142	0.02423	3235	0.04413	cellular&nbsp;organisms>Bacteria>FCB&nbsp;group>Bacteroidetes/Chlorobi&nbsp;group>Bacteroidetes>Cytophagia>Cytophagales>Hymenobacteraceae>Pontibacter
Paludibaculum fermentans	S	1473598	3457	0.04449	1636	0.01081	2144	0.009652	3457	0.04256	NA	NA	3261	0.04449	cellular&nbsp;organisms>Bacteria>Acidobacteria>Acidobacteriia>Bryobacterales>Bryobacteraceae>Paludibaculum
Zunongwangia profunda	S	398743	5988	0.04442	5988	0.03956	5640	0.02539	3608	0.04442	2989	0.0338	NA	NA	cellular&nbsp;organisms>Bacteria>FCB&nbsp;group>Bacteroidetes/Chlorobi&nbsp;group>Bacteroidetes>Flavobacteriia>Flavobacteriales>Flavobacteriaceae>Zunongwangia
Chryseobacterium sp. JV274	S	1932669	6718	0.04439	6718	0.04439	6155	0.02771	NA	NA	NA	NA	NA	NA	cellular&nbsp;organisms>Bacteria>FCB&nbsp;group>Bacteroidetes/Chlorobi&nbsp;group>Bacteroidetes>Flavobacteriia>Flavobacteriales>Weeksellaceae>Chryseobacterium&nbsp;group>Chryseobacterium>unclassified&nbsp;Chryseobacterium
Bacillus marisflavi	S	189381	3925	0.04439	3786	0.02502	2744	0.01235	2826	0.0348	3925	0.04439	2531	0.03453	cellular&nbsp;organisms>Bacteria>Terrabacteria&nbsp;group>Firmicutes>Bacilli>Bacillales>Bacillaceae>Bacillus
Micromonospora sp. B006	S	2201999	3245	0.04427	NA	NA	NA	NA	NA	NA	NA	NA	3245	0.04427	cellular&nbsp;organisms>Bacteria>Terrabacteria&nbsp;group>Actinobacteria>Actinomycetia>Micromonosporales>Micromonosporaceae>Micromonospora>unclassified&nbsp;Micromonospora
Lactococcus cremoris	S	1359	3589	0.04419	2671	0.01765	NA	NA	3589	0.04419	3018	0.03413	3140	0.04284	cellular&nbsp;organisms>Bacteria>Terrabacteria&nbsp;group>Firmicutes>Bacilli>Lactobacillales>Streptococcaceae>Lactococcus
Pyxidicoccus sp. SCPEA002	S	2813578	3234	0.04412	1728	0.01142	2020	0.009094	2959	0.03643	NA	NA	3234	0.04412	cellular&nbsp;organisms>Bacteria>Proteobacteria>delta/epsilon&nbsp;subdivisions>Deltaproteobacteria>Myxococcales>Cystobacterineae>Myxococcaceae>Pyxidicoccus>unclassified&nbsp;Pyxidicoccus
Paenibacillus lycopersici	S	2704462	3227	0.04402	1400	0.00925	2011	0.009053	3062	0.0377	NA	NA	3227	0.04402	cellular&nbsp;organisms>Bacteria>Terrabacteria&nbsp;group>Firmicutes>Bacilli>Bacillales>Paenibacillaceae>Paenibacillus
Enterococcus avium	S	33945	3892	0.04402	2385	0.01576	1845	0.008306	2176	0.02679	3892	0.04402	2207	0.03011	cellular&nbsp;organisms>Bacteria>Terrabacteria&nbsp;group>Firmicutes>Bacilli>Lactobacillales>Enterococcaceae>Enterococcus
Buttiauxella sp. 3AFRM03	S	2479367	9771	0.04399	NA	NA	9771	0.04399	NA	NA	NA	NA	NA	NA	cellular&nbsp;organisms>Bacteria>Proteobacteria>Gammaproteobacteria>Enterobacterales>Enterobacteriaceae>Buttiauxella>unclassified&nbsp;Buttiauxella
Selenomonas sp. oral taxon 126	S	712528	3224	0.04398	2000	0.01321	2111	0.009504	2968	0.03654	NA	NA	3224	0.04398	cellular&nbsp;organisms>Bacteria>Terrabacteria&nbsp;group>Firmicutes>Negativicutes>Selenomonadales>Selenomonadaceae>Selenomonas>unclassified&nbsp;Selenomonas
Chryseobacterium sp. G0162	S	2487063	6655	0.04397	6655	0.04397	4911	0.02211	NA	NA	NA	NA	NA	NA	cellular&nbsp;organisms>Bacteria>FCB&nbsp;group>Bacteroidetes/Chlorobi&nbsp;group>Bacteroidetes>Flavobacteriia>Flavobacteriales>Weeksellaceae>Chryseobacterium&nbsp;group>Chryseobacterium>unclassified&nbsp;Chryseobacterium
Rhodococcus rhodochrous	S	1829	3223	0.04397	NA	NA	2432	0.01095	3071	0.03781	NA	NA	3223	0.04397	cellular&nbsp;organisms>Bacteria>Terrabacteria&nbsp;group>Actinobacteria>Actinomycetia>Corynebacteriales>Nocardiaceae>Rhodococcus
Romboutsia ilealis	S	1115758	3882	0.0439	1442	0.009528	1306	0.00588	1901	0.02341	3882	0.0439	1684	0.02297	cellular&nbsp;organisms>Bacteria>Terrabacteria&nbsp;group>Firmicutes>Clostridia>Eubacteriales>Peptostreptococcaceae>Romboutsia
Paraclostridium bifermentans	S	1490	3880	0.04388	1455	0.009614	1257	0.005659	1980	0.02438	3880	0.04388	2173	0.02964	cellular&nbsp;organisms>Bacteria>Terrabacteria&nbsp;group>Firmicutes>Clostridia>Eubacteriales>Peptostreptococcaceae>Paraclostridium
Erwinia billingiae	S	182337	9732	0.04381	NA	NA	9732	0.04381	NA	NA	2991	0.03383	NA	NA	cellular&nbsp;organisms>Bacteria>Proteobacteria>Gammaproteobacteria>Enterobacterales>Erwiniaceae>Erwinia
Planctomyces sp. SH-PL14	S	1632864	3206	0.04374	1471	0.009719	2132	0.009598	3149	0.03877	NA	NA	3206	0.04374	cellular&nbsp;organisms>Bacteria>PVC&nbsp;group>Planctomycetes>Planctomycetia>Planctomycetales>Planctomycetaceae>Planctomyces>unclassified&nbsp;Planctomyces
Pseudoalteromonas luteoviolacea	S	43657	4497	0.04372	4497	0.02971	2237	0.01007	3551	0.04372	2260	0.02556	NA	NA	cellular&nbsp;organisms>Bacteria>Proteobacteria>Gammaproteobacteria>Alteromonadales>Pseudoalteromonadaceae>Pseudoalteromonas
Bradyrhizobium japonicum	S	375	3200	0.04366	NA	NA	NA	NA	2309	0.02843	NA	NA	3200	0.04366	cellular&nbsp;organisms>Bacteria>Proteobacteria>Alphaproteobacteria>Hyphomicrobiales>Bradyrhizobiaceae>Bradyrhizobium
Deinococcus actinosclerus	S	1768108	3309	0.04364	NA	NA	NA	NA	3309	0.04074	NA	NA	3199	0.04364	cellular&nbsp;organisms>Bacteria>Terrabacteria&nbsp;group>Deinococcus&#x2011;Thermus>Deinococci>Deinococcales>Deinococcaceae>Deinococcus
Devosia sp. A16	S	1736675	3197	0.04361	NA	NA	1465	0.006595	1903	0.02343	NA	NA	3197	0.04361	cellular&nbsp;organisms>Bacteria>Proteobacteria>Alphaproteobacteria>Hyphomicrobiales>Hyphomicrobiaceae>Devosia>unclassified&nbsp;Devosia
Capnocytophaga haemolytica	S	45243	3536	0.04354	1636	0.01081	NA	NA	3536	0.04354	2524	0.02855	3063	0.04179	cellular&nbsp;organisms>Bacteria>FCB&nbsp;group>Bacteroidetes/Chlorobi&nbsp;group>Bacteroidetes>Flavobacteriia>Flavobacteriales>Flavobacteriaceae>Capnocytophaga
Nonomuraea sp. ATCC 55076	S	1909395	3528	0.04344	2464	0.01628	2532	0.0114	3528	0.04344	NA	NA	2951	0.04026	cellular&nbsp;organisms>Bacteria>Terrabacteria&nbsp;group>Actinobacteria>Actinomycetia>Streptosporangiales>Streptosporangiaceae>Nonomuraea>unclassified&nbsp;Nonomuraea
Caldicellulosiruptor changbaiensis	S	1222016	3838	0.04341	NA	NA	NA	NA	NA	NA	3838	0.04341	NA	NA	cellular&nbsp;organisms>Bacteria>Terrabacteria&nbsp;group>Firmicutes>Clostridia>Thermoanaerobacterales>Thermoanaerobacterales&nbsp;Family&nbsp;III.&nbsp;Incertae&nbsp;Sedis>Caldicellulosiruptor
Streptomyces albus	S	1888	3168	0.04322	3023	0.01997	2428	0.01093	2873	0.03537	NA	NA	3168	0.04322	cellular&nbsp;organisms>Bacteria>Terrabacteria&nbsp;group>Actinobacteria>Actinomycetia>Streptomycetales>Streptomycetaceae>Streptomyces
Clostridium formicaceticum	S	1497	3813	0.04312	1474	0.009739	1211	0.005452	1870	0.02302	3813	0.04312	2085	0.02844	cellular&nbsp;organisms>Bacteria>Terrabacteria&nbsp;group>Firmicutes>Clostridia>Eubacteriales>Clostridiaceae>Clostridium
Legionella pneumophila	S	446	3499	0.04308	2493	0.01647	2193	0.009873	3499	0.04308	3288	0.03719	2757	0.03761	cellular&nbsp;organisms>Bacteria>Proteobacteria>Gammaproteobacteria>Legionellales>Legionellaceae>Legionella
Lactobacillus crispatus	S	47770	3804	0.04302	3264	0.02157	NA	NA	1990	0.0245	3804	0.04302	2073	0.02828	cellular&nbsp;organisms>Bacteria>Terrabacteria&nbsp;group>Firmicutes>Bacilli>Lactobacillales>Lactobacillaceae>Lactobacillus
Formosa sp. L2A11	S	2686363	7362	0.04301	6510	0.04301	7362	0.03314	1297	0.01597	1620	0.01832	NA	NA	cellular&nbsp;organisms>Bacteria>FCB&nbsp;group>Bacteroidetes/Chlorobi&nbsp;group>Bacteroidetes>Flavobacteriia>Flavobacteriales>Flavobacteriaceae>Formosa>unclassified&nbsp;Formosa
Wenyingzhuangia fucanilytica	S	1790137	6535	0.04299	6506	0.04299	6535	0.02942	1302	0.01603	1348	0.01525	1324	0.01806	cellular&nbsp;organisms>Bacteria>FCB&nbsp;group>Bacteroidetes/Chlorobi&nbsp;group>Bacteroidetes>Flavobacteriia>Flavobacteriales>Flavobacteriaceae>Wenyingzhuangia
Pectobacterium carotovorum	S	554	3482	0.04287	NA	NA	NA	NA	3482	0.04287	NA	NA	2890	0.03943	cellular&nbsp;organisms>Bacteria>Proteobacteria>Gammaproteobacteria>Enterobacterales>Pectobacteriaceae>Pectobacterium
Lactobacillus amylovorus	S	1604	3783	0.04278	1654	0.01093	NA	NA	2546	0.03135	3783	0.04278	3060	0.04175	cellular&nbsp;organisms>Bacteria>Terrabacteria&nbsp;group>Firmicutes>Bacilli>Lactobacillales>Lactobacillaceae>Lactobacillus
Caloranaerobacter azorensis	S	116090	3780	0.04275	NA	NA	NA	NA	1558	0.01918	3780	0.04275	1484	0.02025	cellular&nbsp;organisms>Bacteria>Terrabacteria&nbsp;group>Firmicutes>Clostridia>Eubacteriales>Clostridiaceae>Caloranaerobacter
Romboutsia hominis	S	1507512	3780	0.04275	1097	0.007248	NA	NA	1615	0.01988	3780	0.04275	1609	0.02195	cellular&nbsp;organisms>Bacteria>Terrabacteria&nbsp;group>Firmicutes>Clostridia>Eubacteriales>Peptostreptococcaceae>Romboutsia
Rhodothermus marinus	S	29549	3468	0.0427	1669	0.01103	1911	0.008603	3468	0.0427	1196	0.01353	3107	0.04239	cellular&nbsp;organisms>Bacteria>FCB&nbsp;group>Bacteroidetes/Chlorobi&nbsp;group>Bacteroidetes>Bacteroidetes&nbsp;Order&nbsp;II.&nbsp;Incertae&nbsp;sedis>Rhodothermaceae>Rhodothermus
Geobacillus sp. 44B	S	1963023	4028	0.04269	NA	NA	4028	0.01813	NA	NA	3775	0.04269	NA	NA	cellular&nbsp;organisms>Bacteria>Terrabacteria&nbsp;group>Firmicutes>Bacilli>Bacillales>Bacillaceae>Geobacillus>unclassified&nbsp;Geobacillus
Phaeobacter gallaeciensis	S	60890	3127	0.04266	NA	NA	NA	NA	2104	0.02591	NA	NA	3127	0.04266	cellular&nbsp;organisms>Bacteria>Proteobacteria>Alphaproteobacteria>Rhodobacterales>Rhodobacteraceae>Phaeobacter
Chryseobacterium sp. G0201	S	2487065	6453	0.04264	6453	0.04264	4587	0.02065	1247	0.01535	1757	0.01987	NA	NA	cellular&nbsp;organisms>Bacteria>FCB&nbsp;group>Bacteroidetes/Chlorobi&nbsp;group>Bacteroidetes>Flavobacteriia>Flavobacteriales>Weeksellaceae>Chryseobacterium&nbsp;group>Chryseobacterium>unclassified&nbsp;Chryseobacterium
Humisphaera borealis	S	2807512	3188	0.04244	1545	0.01021	2370	0.01067	3188	0.03925	NA	NA	3111	0.04244	cellular&nbsp;organisms>Bacteria>PVC&nbsp;group>Planctomycetes>Phycisphaerae>Tepidisphaerales>Tepidisphaeraceae>Humisphaera
Actinoplanes sp. OR16	S	946334	3437	0.04232	NA	NA	2497	0.01124	3437	0.04232	NA	NA	2986	0.04074	cellular&nbsp;organisms>Bacteria>Terrabacteria&nbsp;group>Actinobacteria>Actinomycetia>Micromonosporales>Micromonosporaceae>Actinoplanes>unclassified&nbsp;Actinoplanes
Desulfovibrio vulgaris	S	881	3413	0.0423	1875	0.01239	2036	0.009166	3413	0.04202	NA	NA	3101	0.0423	cellular&nbsp;organisms>Bacteria>Proteobacteria>delta/epsilon&nbsp;subdivisions>Deltaproteobacteria>Desulfovibrionales>Desulfovibrionaceae>Desulfovibrio
Conexibacter woesei	S	191495	3425	0.0423	1592	0.01052	2276	0.01025	3425	0.04217	NA	NA	3101	0.0423	cellular&nbsp;organisms>Bacteria>Terrabacteria&nbsp;group>Actinobacteria>Thermoleophilia>Solirubrobacterales>Conexibacteraceae>Conexibacter
Skermanella sp. TT6	S	2775420	3359	0.04229	NA	NA	NA	NA	3359	0.04136	NA	NA	3100	0.04229	cellular&nbsp;organisms>Bacteria>Proteobacteria>Alphaproteobacteria>Rhodospirillales>Rhodospirillaceae>Skermanella>unclassified&nbsp;Skermanella
Cellulosimicrobium cellulans	S	1710	3302	0.04221	NA	NA	NA	NA	3302	0.04066	NA	NA	3094	0.04221	cellular&nbsp;organisms>Bacteria>Terrabacteria&nbsp;group>Actinobacteria>Actinomycetia>Micrococcales>Promicromonosporaceae>Cellulosimicrobium
Oceanobacillus iheyensis	S	182710	3731	0.0422	2846	0.0188	1855	0.008351	2092	0.02576	3731	0.0422	2002	0.02731	cellular&nbsp;organisms>Bacteria>Terrabacteria&nbsp;group>Firmicutes>Bacilli>Bacillales>Bacillaceae>Oceanobacillus
Lactobacillus kefiranofaciens	S	267818	3731	0.0422	NA	NA	NA	NA	NA	NA	3731	0.0422	NA	NA	cellular&nbsp;organisms>Bacteria>Terrabacteria&nbsp;group>Firmicutes>Bacilli>Lactobacillales>Lactobacillaceae>Lactobacillus
Xanthomonas translucens	S	343	3090	0.04215	NA	NA	NA	NA	1576	0.0194	NA	NA	3090	0.04215	cellular&nbsp;organisms>Bacteria>Proteobacteria>Gammaproteobacteria>Xanthomonadales>Xanthomonadaceae>Xanthomonas
Plantactinospora sp. KBS50	S	2024580	3084	0.04207	NA	NA	NA	NA	2989	0.0368	NA	NA	3084	0.04207	cellular&nbsp;organisms>Bacteria>Terrabacteria&nbsp;group>Actinobacteria>Actinomycetia>Micromonosporales>Micromonosporaceae>Plantactinospora>unclassified&nbsp;Plantactinospora
Levilactobacillus brevis	S	1580	3710	0.04196	1741	0.0115	1327	0.005974	1686	0.02076	3710	0.04196	1952	0.02663	cellular&nbsp;organisms>Bacteria>Terrabacteria&nbsp;group>Firmicutes>Bacilli>Lactobacillales>Lactobacillaceae>Levilactobacillus
Flavobacterium sp. MDT1-60	S	1979344	7919	0.04194	6348	0.04194	7919	0.03565	1597	0.01966	1500	0.01696	1925	0.02626	cellular&nbsp;organisms>Bacteria>FCB&nbsp;group>Bacteroidetes/Chlorobi&nbsp;group>Bacteroidetes>Flavobacteriia>Flavobacteriales>Flavobacteriaceae>Flavobacterium>unclassified&nbsp;Flavobacterium
Pseudopedobacter saltans	S	151895	3600	0.0418	3600	0.02379	2908	0.01309	3395	0.0418	3245	0.0367	2726	0.03719	cellular&nbsp;organisms>Bacteria>FCB&nbsp;group>Bacteroidetes/Chlorobi&nbsp;group>Bacteroidetes>Sphingobacteriia>Sphingobacteriales>Sphingobacteriaceae>Pseudopedobacter
Clostridium aceticum	S	84022	3695	0.04179	1111	0.007341	NA	NA	1742	0.02145	3695	0.04179	1709	0.02331	cellular&nbsp;organisms>Bacteria>Terrabacteria&nbsp;group>Firmicutes>Clostridia>Eubacteriales>Clostridiaceae>Clostridium
Dysgonomonas sp. HDW5B	S	2714927	3693	0.04177	NA	NA	NA	NA	3366	0.04144	3693	0.04177	NA	NA	cellular&nbsp;organisms>Bacteria>FCB&nbsp;group>Bacteroidetes/Chlorobi&nbsp;group>Bacteroidetes>Bacteroidia>Bacteroidales>Dysgonomonadaceae>Dysgonomonas>unclassified&nbsp;Dysgonomonas
Persicimonas caeni	S	2292766	3147	0.04173	1464	0.009673	2059	0.00927	3147	0.03875	NA	NA	3059	0.04173	cellular&nbsp;organisms>Bacteria>Proteobacteria>delta/epsilon&nbsp;subdivisions>Deltaproteobacteria>Bradymonadales>Bradymonadaceae>Persicimonas
Maribacter cobaltidurans	S	1178778	3386	0.04169	NA	NA	2153	0.009693	3386	0.04169	NA	NA	NA	NA	cellular&nbsp;organisms>Bacteria>FCB&nbsp;group>Bacteroidetes/Chlorobi&nbsp;group>Bacteroidetes>Flavobacteriia>Flavobacteriales>Flavobacteriaceae>Maribacter
Turicibacter sp. H121	S	1712675	3685	0.04168	1629	0.01076	NA	NA	2423	0.02983	3685	0.04168	2387	0.03256	cellular&nbsp;organisms>Bacteria>Terrabacteria&nbsp;group>Firmicutes>Erysipelotrichia>Erysipelotrichales>Turicibacteraceae>Turicibacter>unclassified&nbsp;Turicibacter
Bartonella apis	S	1686310	3073	0.0416	NA	NA	NA	NA	2419	0.02978	3073	0.03475	3049	0.0416	cellular&nbsp;organisms>Bacteria>Proteobacteria>Alphaproteobacteria>Hyphomicrobiales>Bartonellaceae>Bartonella
Cupriavidus pauculus	S	82633	3226	0.04151	1908	0.01261	2491	0.01121	3226	0.03972	NA	NA	3043	0.04151	cellular&nbsp;organisms>Bacteria>Proteobacteria>Betaproteobacteria>Burkholderiales>Burkholderiaceae>Cupriavidus
Brevundimonas naejangsanensis	S	588932	3033	0.04138	NA	NA	2291	0.01031	2963	0.03648	NA	NA	3033	0.04138	cellular&nbsp;organisms>Bacteria>Proteobacteria>Alphaproteobacteria>Caulobacterales>Caulobacteraceae>Brevundimonas
Dyadobacter fermentans	S	94254	3360	0.04137	1919	0.01268	1683	0.007577	3360	0.04137	2344	0.02651	3023	0.04124	cellular&nbsp;organisms>Bacteria>FCB&nbsp;group>Bacteroidetes/Chlorobi&nbsp;group>Bacteroidetes>Cytophagia>Cytophagales>Cytophagaceae>Dyadobacter
Gemella haemolysans	S	1379	3658	0.04137	2094	0.01384	3428	0.01543	2650	0.03263	3658	0.04137	2414	0.03293	cellular&nbsp;organisms>Bacteria>Terrabacteria&nbsp;group>Firmicutes>Bacilli>Bacillales>Bacillales&nbsp;incertae&nbsp;sedis>Bacillales&nbsp;Family&nbsp;XI.&nbsp;Incertae&nbsp;Sedis>Gemella
Alkaliphilus oremlandii	S	461876	3657	0.04136	1440	0.009514	NA	NA	1655	0.02038	3657	0.04136	1809	0.02468	cellular&nbsp;organisms>Bacteria>Terrabacteria&nbsp;group>Firmicutes>Clostridia>Eubacteriales>Clostridiaceae>Alkaliphilus
Campylobacter lari	S	201	3026	0.04128	NA	NA	NA	NA	2031	0.02501	1753	0.01983	3026	0.04128	cellular&nbsp;organisms>Bacteria>Proteobacteria>delta/epsilon&nbsp;subdivisions>Epsilonproteobacteria>Campylobacterales>Campylobacteraceae>Campylobacter
Peribacillus simplex	S	1478	3346	0.0412	2881	0.01904	2777	0.0125	3346	0.0412	2383	0.02695	NA	NA	cellular&nbsp;organisms>Bacteria>Terrabacteria&nbsp;group>Firmicutes>Bacilli>Bacillales>Bacillaceae>Peribacillus
Burkholderia multivorans	S	87883	3338	0.0411	2123	0.01403	2564	0.01154	3338	0.0411	NA	NA	2985	0.04072	cellular&nbsp;organisms>Bacteria>Proteobacteria>Betaproteobacteria>Burkholderiales>Burkholderiaceae>Burkholderia>Burkholderia&nbsp;cepacia&nbsp;complex
Tissierellia sp. JN-28	S	2507161	3632	0.04108	1409	0.00931	1413	0.006361	1804	0.02221	3632	0.04108	1882	0.02567	cellular&nbsp;organisms>Bacteria>Terrabacteria&nbsp;group>Firmicutes>Tissierellia>Tissierellales>Tissierellaceae>Tissierella>unclassified&nbsp;Tissierella
Paenibacillus mucilaginosus	S	61624	3222	0.04106	1612	0.01065	2064	0.009292	3222	0.03967	1957	0.02213	3010	0.04106	cellular&nbsp;organisms>Bacteria>Terrabacteria&nbsp;group>Firmicutes>Bacilli>Bacillales>Paenibacillaceae>Paenibacillus
Erythrobacter litoralis	S	39960	3331	0.04101	NA	NA	NA	NA	3331	0.04101	NA	NA	2400	0.03274	cellular&nbsp;organisms>Bacteria>Proteobacteria>Alphaproteobacteria>Sphingomonadales>Erythrobacteraceae>Erythrobacter/Porphyrobacter&nbsp;group>Erythrobacter
Lactobacillus iners	S	147802	3622	0.04096	NA	NA	NA	NA	2353	0.02897	3622	0.04096	1949	0.02659	cellular&nbsp;organisms>Bacteria>Terrabacteria&nbsp;group>Firmicutes>Bacilli>Lactobacillales>Lactobacillaceae>Lactobacillus
Flavobacterium johnsoniae	S	986	7955	0.04088	6187	0.04088	7955	0.03581	2401	0.02956	3590	0.0406	2370	0.03233	cellular&nbsp;organisms>Bacteria>FCB&nbsp;group>Bacteroidetes/Chlorobi&nbsp;group>Bacteroidetes>Flavobacteriia>Flavobacteriales>Flavobacteriaceae>Flavobacterium
Tessaracoccus defluvii	S	1285901	3271	0.04083	NA	NA	NA	NA	3271	0.04027	NA	NA	2993	0.04083	cellular&nbsp;organisms>Bacteria>Terrabacteria&nbsp;group>Actinobacteria>Actinomycetia>Propionibacteriales>Propionibacteriaceae>Tessaracoccus
Gottschalkia acidurici	S	1556	3608	0.0408	NA	NA	NA	NA	1575	0.01939	3608	0.0408	1406	0.01918	cellular&nbsp;organisms>Bacteria>Terrabacteria&nbsp;group>Firmicutes>Tissierellia>Tissierellales>Gottschalkiaceae>Gottschalkia
Chryseobacterium joostei	S	112234	6172	0.04078	6172	0.04078	5697	0.02565	1560	0.01921	2326	0.02631	NA	NA	cellular&nbsp;organisms>Bacteria>FCB&nbsp;group>Bacteroidetes/Chlorobi&nbsp;group>Bacteroidetes>Flavobacteriia>Flavobacteriales>Weeksellaceae>Chryseobacterium&nbsp;group>Chryseobacterium
Desulfonema limicola	S	45656	3605	0.04077	1421	0.009389	NA	NA	1674	0.02061	3605	0.04077	1751	0.02389	cellular&nbsp;organisms>Bacteria>Proteobacteria>delta/epsilon&nbsp;subdivisions>Deltaproteobacteria>Desulfobacterales>Desulfobacteraceae>Desulfonema
Sphingobacterium lactis	S	797291	3309	0.04074	2749	0.01816	2463	0.01109	3309	0.04074	2798	0.03164	2337	0.03188	cellular&nbsp;organisms>Bacteria>FCB&nbsp;group>Bacteroidetes/Chlorobi&nbsp;group>Bacteroidetes>Sphingobacteriia>Sphingobacteriales>Sphingobacteriaceae>Sphingobacterium
Euzebyella marina	S	1761453	2982	0.04068	2654	0.01754	2849	0.01283	2627	0.03235	1876	0.02122	2982	0.04068	cellular&nbsp;organisms>Bacteria>FCB&nbsp;group>Bacteroidetes/Chlorobi&nbsp;group>Bacteroidetes>Flavobacteriia>Flavobacteriales>Flavobacteriaceae>Euzebyella
Keratinibaculum paraultunense	S	1278232	3597	0.04068	NA	NA	NA	NA	1675	0.02062	3597	0.04068	1692	0.02308	cellular&nbsp;organisms>Bacteria>Terrabacteria&nbsp;group>Firmicutes>Tissierellia>Tissierellales>Tissierellaceae>Keratinibaculum
Variovorax sp. HW608	S	1034889	4172	0.04057	3150	0.02081	4172	0.01878	2557	0.03148	NA	NA	2974	0.04057	cellular&nbsp;organisms>Bacteria>Proteobacteria>Betaproteobacteria>Burkholderiales>Comamonadaceae>Variovorax>unclassified&nbsp;Variovorax
Streptomyces seoulensis	S	73044	3995	0.04052	3995	0.0264	2781	0.01252	3206	0.03947	NA	NA	2970	0.04052	cellular&nbsp;organisms>Bacteria>Terrabacteria&nbsp;group>Actinobacteria>Actinomycetia>Streptomycetales>Streptomycetaceae>Streptomyces
Rhodococcus sp. MTM3W5.2	S	1805827	3288	0.04048	NA	NA	NA	NA	3288	0.04048	NA	NA	2872	0.03918	cellular&nbsp;organisms>Bacteria>Terrabacteria&nbsp;group>Actinobacteria>Actinomycetia>Corynebacteriales>Nocardiaceae>Rhodococcus>unclassified&nbsp;Rhodococcus
Robiginitalea biformata	S	252307	3285	0.04045	1448	0.009567	NA	NA	3285	0.04045	1665	0.01883	2312	0.03154	cellular&nbsp;organisms>Bacteria>FCB&nbsp;group>Bacteroidetes/Chlorobi&nbsp;group>Bacteroidetes>Flavobacteriia>Flavobacteriales>Flavobacteriaceae>Robiginitalea
Flavobacterium sp. 140616W15	S	2478552	8622	0.04044	6120	0.04044	8622	0.03882	1340	0.0165	2045	0.02313	1444	0.0197	cellular&nbsp;organisms>Bacteria>FCB&nbsp;group>Bacteroidetes/Chlorobi&nbsp;group>Bacteroidetes>Flavobacteriia>Flavobacteriales>Flavobacteriaceae>Flavobacterium>unclassified&nbsp;Flavobacterium
Vibrio anguillarum	S	55601	3576	0.04044	NA	NA	1976	0.008896	NA	NA	3576	0.04044	NA	NA	cellular&nbsp;organisms>Bacteria>Proteobacteria>Gammaproteobacteria>Vibrionales>Vibrionaceae>Vibrio
Pseudonocardia autotrophica	S	2074	2962	0.04041	NA	NA	2506	0.01128	2492	0.03068	NA	NA	2962	0.04041	cellular&nbsp;organisms>Bacteria>Terrabacteria&nbsp;group>Actinobacteria>Actinomycetia>Pseudonocardiales>Pseudonocardiaceae>Pseudonocardia
Anaerococcus prevotii	S	33034	3276	0.04034	NA	NA	NA	NA	3276	0.04034	3275	0.03704	2577	0.03516	cellular&nbsp;organisms>Bacteria>Terrabacteria&nbsp;group>Firmicutes>Tissierellia>Tissierellales>Peptoniphilaceae>Anaerococcus
Streptococcus anginosus	S	1328	4065	0.04022	4065	0.02686	NA	NA	NA	NA	3556	0.04022	NA	NA	cellular&nbsp;organisms>Bacteria>Terrabacteria&nbsp;group>Firmicutes>Bacilli>Lactobacillales>Streptococcaceae>Streptococcus>Streptococcus&nbsp;anginosus&nbsp;group
Dietzia sp. oral taxon 368	S	712270	2940	0.04011	NA	NA	NA	NA	NA	NA	NA	NA	2940	0.04011	cellular&nbsp;organisms>Bacteria>Terrabacteria&nbsp;group>Actinobacteria>Actinomycetia>Corynebacteriales>Dietziaceae>Dietzia>unclassified&nbsp;Dietzia
Sphingomonas sanxanigenens	S	397260	5105	0.04009	NA	NA	5105	0.02298	2839	0.03496	NA	NA	2939	0.04009	cellular&nbsp;organisms>Bacteria>Proteobacteria>Alphaproteobacteria>Sphingomonadales>Sphingomonadaceae>Sphingomonas
Hathewaya histolytica	S	1498	3544	0.04008	1098	0.007255	NA	NA	1895	0.02333	3544	0.04008	2019	0.02754	cellular&nbsp;organisms>Bacteria>Terrabacteria&nbsp;group>Firmicutes>Clostridia>Eubacteriales>Clostridiaceae>Hathewaya
Pseudomonas versuta	S	1788301	6379	0.04005	6061	0.04005	6379	0.02872	1882	0.02317	1307	0.01478	NA	NA	cellular&nbsp;organisms>Bacteria>Proteobacteria>Gammaproteobacteria>Pseudomonadales>Pseudomonadaceae>Pseudomonas
Tenacibaculum todarodis	S	1850252	6308	0.04001	6055	0.04001	6308	0.0284	NA	NA	1424	0.0161	NA	NA	cellular&nbsp;organisms>Bacteria>FCB&nbsp;group>Bacteroidetes/Chlorobi&nbsp;group>Bacteroidetes>Flavobacteriia>Flavobacteriales>Flavobacteriaceae>Tenacibaculum
Polaribacter sp. BM10	S	1529069	6046	0.03995	6046	0.03995	5558	0.02502	NA	NA	NA	NA	NA	NA	cellular&nbsp;organisms>Bacteria>FCB&nbsp;group>Bacteroidetes/Chlorobi&nbsp;group>Bacteroidetes>Flavobacteriia>Flavobacteriales>Flavobacteriaceae>Polaribacter>unclassified&nbsp;Polaribacter
Pontibacter akesuensis	S	388950	3241	0.03991	1817	0.01201	NA	NA	3241	0.03991	1538	0.01739	2676	0.03651	cellular&nbsp;organisms>Bacteria>FCB&nbsp;group>Bacteroidetes/Chlorobi&nbsp;group>Bacteroidetes>Cytophagia>Cytophagales>Hymenobacteraceae>Pontibacter
Halomonas sp. 1513	S	1883416	6026	0.03982	6026	0.03982	NA	NA	NA	NA	NA	NA	NA	NA	cellular&nbsp;organisms>Bacteria>Proteobacteria>Gammaproteobacteria>Oceanospirillales>Halomonadaceae>Halomonas>unclassified&nbsp;Halomonas
Virgibacillus necropolis	S	163877	2919	0.03982	1872	0.01237	2837	0.01277	1835	0.02259	1427	0.01614	2919	0.03982	cellular&nbsp;organisms>Bacteria>Terrabacteria&nbsp;group>Firmicutes>Bacilli>Bacillales>Bacillaceae>Virgibacillus
Botrimarina mediterranea	S	2528022	2999	0.03979	1655	0.01094	1844	0.008302	2999	0.03693	NA	NA	2917	0.03979	cellular&nbsp;organisms>Bacteria>PVC&nbsp;group>Planctomycetes>Planctomycetia>Pirellulales>Lacipirellulaceae>Botrimarina
Olleya aquimaris	S	639310	6797	0.03978	6020	0.03978	6797	0.0306	NA	NA	2312	0.02615	NA	NA	cellular&nbsp;organisms>Bacteria>FCB&nbsp;group>Bacteroidetes/Chlorobi&nbsp;group>Bacteroidetes>Flavobacteriia>Flavobacteriales>Flavobacteriaceae>Olleya
Alteromonas mediterranea	S	314275	3226	0.03972	NA	NA	NA	NA	3226	0.03972	2329	0.02634	2265	0.0309	cellular&nbsp;organisms>Bacteria>Proteobacteria>Gammaproteobacteria>Alteromonadales>Alteromonadaceae>Alteromonas
Chryseobacterium camelliae	S	1265445	4139	0.03968	4139	0.02735	2613	0.01176	3223	0.03968	3476	0.03931	2223	0.03033	cellular&nbsp;organisms>Bacteria>FCB&nbsp;group>Bacteroidetes/Chlorobi&nbsp;group>Bacteroidetes>Flavobacteriia>Flavobacteriales>Weeksellaceae>Chryseobacterium&nbsp;group>Chryseobacterium
Acidipropionibacterium jensenii	S	1749	2898	0.03954	NA	NA	NA	NA	2368	0.02916	NA	NA	2898	0.03954	cellular&nbsp;organisms>Bacteria>Terrabacteria&nbsp;group>Actinobacteria>Actinomycetia>Propionibacteriales>Propionibacteriaceae>Acidipropionibacterium
Verrucomicrobium spinosum	S	2736	3206	0.03947	2260	0.01493	2198	0.009895	3206	0.03947	1431	0.01618	2790	0.03806	cellular&nbsp;organisms>Bacteria>PVC&nbsp;group>Verrucomicrobia>Verrucomicrobiae>Verrucomicrobiales>Verrucomicrobiaceae>Verrucomicrobium
Burkholderia sp. THE68	S	758782	3205	0.03946	NA	NA	NA	NA	3205	0.03946	NA	NA	2732	0.03727	cellular&nbsp;organisms>Bacteria>Proteobacteria>Betaproteobacteria>Burkholderiales>Burkholderiaceae>Burkholderia>unclassified&nbsp;Burkholderia
Sphingomonas wittichii	S	160791	2890	0.03943	NA	NA	NA	NA	2367	0.02914	NA	NA	2890	0.03943	cellular&nbsp;organisms>Bacteria>Proteobacteria>Alphaproteobacteria>Sphingomonadales>Sphingomonadaceae>Sphingomonas
Seonamhaeicola sp. S2-3	S	1936081	5966	0.03942	5966	0.03942	3407	0.01534	1338	0.01647	1537	0.01738	1318	0.01798	cellular&nbsp;organisms>Bacteria>FCB&nbsp;group>Bacteroidetes/Chlorobi&nbsp;group>Bacteroidetes>Flavobacteriia>Flavobacteriales>Flavobacteriaceae>Seonamhaeicola>unclassified&nbsp;Seonamhaeicola
Thermoanaerobacterium sp. RBIITD	S	1550240	3478	0.03933	1414	0.009343	1696	0.007635	1977	0.02434	3478	0.03933	2103	0.02869	cellular&nbsp;organisms>Bacteria>Terrabacteria&nbsp;group>Firmicutes>Clostridia>Thermoanaerobacterales>Thermoanaerobacterales&nbsp;Family&nbsp;III.&nbsp;Incertae&nbsp;Sedis>Thermoanaerobacterium>unclassified&nbsp;Thermoanaerobacterium
Cruoricaptor ignavus	S	1118202	3193	0.03931	1560	0.01031	NA	NA	3193	0.03931	NA	NA	2273	0.03101	cellular&nbsp;organisms>Bacteria>FCB&nbsp;group>Bacteroidetes/Chlorobi&nbsp;group>Bacteroidetes>Flavobacteriia>Flavobacteriales>Weeksellaceae>Cruoricaptor
Lactobacillus delbrueckii	S	1584	3007	0.03926	2567	0.01696	NA	NA	2951	0.03633	3007	0.03401	2878	0.03926	cellular&nbsp;organisms>Bacteria>Terrabacteria&nbsp;group>Firmicutes>Bacilli>Lactobacillales>Lactobacillaceae>Lactobacillus
Olsenella sp. LZLJ-2	S	2779519	2872	0.03918	1466	0.009686	1921	0.008648	2674	0.03292	NA	NA	2872	0.03918	cellular&nbsp;organisms>Bacteria>Terrabacteria&nbsp;group>Actinobacteria>Coriobacteriia>Coriobacteriales>Atopobiaceae>Olsenella>unclassified&nbsp;Olsenella
Desulfovibrio piger	S	901	3179	0.03914	1711	0.01131	1799	0.008099	3179	0.03914	1964	0.02221	2746	0.03746	cellular&nbsp;organisms>Bacteria>Proteobacteria>delta/epsilon&nbsp;subdivisions>Deltaproteobacteria>Desulfovibrionales>Desulfovibrionaceae>Desulfovibrio
Tenacibaculum sp. SZ-18	S	754423	6417	0.03908	5914	0.03908	6417	0.02889	1425	0.01755	1636	0.0185	1590	0.02169	cellular&nbsp;organisms>Bacteria>FCB&nbsp;group>Bacteroidetes/Chlorobi&nbsp;group>Bacteroidetes>Flavobacteriia>Flavobacteriales>Flavobacteriaceae>Tenacibaculum>unclassified&nbsp;Tenacibaculum
Olsenella uli	S	133926	2861	0.03903	1339	0.008847	1622	0.007302	2317	0.02853	NA	NA	2861	0.03903	cellular&nbsp;organisms>Bacteria>Terrabacteria&nbsp;group>Actinobacteria>Coriobacteriia>Coriobacteriales>Atopobiaceae>Olsenella
Salinivirga cyanobacteriivorans	S	1307839	3166	0.03898	2168	0.01432	1785	0.008036	3166	0.03898	2170	0.02454	2277	0.03106	cellular&nbsp;organisms>Bacteria>FCB&nbsp;group>Bacteroidetes/Chlorobi&nbsp;group>Bacteroidetes>Bacteroidia>Bacteroidales>Salinivirgaceae>Salinivirga
Gemella morbillorum	S	29391	3444	0.03895	1459	0.00964	NA	NA	2025	0.02493	3444	0.03895	1772	0.02417	cellular&nbsp;organisms>Bacteria>Terrabacteria&nbsp;group>Firmicutes>Bacilli>Bacillales>Bacillales&nbsp;incertae&nbsp;sedis>Bacillales&nbsp;Family&nbsp;XI.&nbsp;Incertae&nbsp;Sedis>Gemella
Clostridium sp. AWRP	S	2212991	3440	0.0389	1092	0.007215	NA	NA	1223	0.01506	3440	0.0389	1264	0.01724	cellular&nbsp;organisms>Bacteria>Terrabacteria&nbsp;group>Firmicutes>Clostridia>Eubacteriales>Clostridiaceae>Clostridium>unclassified&nbsp;Clostridium
Propioniciclava sp. HDW11	S	2714937	2851	0.03888	NA	NA	NA	NA	2851	0.0351	NA	NA	2850	0.03888	cellular&nbsp;organisms>Bacteria>Terrabacteria&nbsp;group>Actinobacteria>Actinomycetia>Propionibacteriales>Propionibacteriaceae>Propioniciclava>unclassified&nbsp;Propioniciclava
Gudongella oleilytica	S	1582259	3158	0.03888	1419	0.009376	1713	0.007712	3158	0.03888	2115	0.02392	2710	0.03697	cellular&nbsp;organisms>Bacteria>Terrabacteria&nbsp;group>Firmicutes>Tissierellia>Tissierellales>Tissierellaceae>Gudongella
Halocella sp. SP3-1	S	2382161	3434	0.03884	1150	0.007598	NA	NA	1331	0.01639	3434	0.03884	1436	0.01959	cellular&nbsp;organisms>Bacteria>Terrabacteria&nbsp;group>Firmicutes>Clostridia>Halanaerobiales>Halanaerobiaceae>Halocella>unclassified&nbsp;Halocella
Sphingomonas koreensis	S	93064	3151	0.0388	NA	NA	NA	NA	3151	0.0388	NA	NA	NA	NA	cellular&nbsp;organisms>Bacteria>Proteobacteria>Alphaproteobacteria>Sphingomonadales>Sphingomonadaceae>Sphingomonas
Polaribacter reichenbachii	S	996801	6583	0.03874	5863	0.03874	6583	0.02964	NA	NA	1430	0.01617	1340	0.01828	cellular&nbsp;organisms>Bacteria>FCB&nbsp;group>Bacteroidetes/Chlorobi&nbsp;group>Bacteroidetes>Flavobacteriia>Flavobacteriales>Flavobacteriaceae>Polaribacter
Proteus mirabilis	S	584	3208	0.03872	2002	0.01323	2973	0.01338	3025	0.03725	3208	0.03628	2838	0.03872	cellular&nbsp;organisms>Bacteria>Proteobacteria>Gammaproteobacteria>Enterobacterales>Morganellaceae>Proteus
Amycolatopsis keratiniphila	S	129921	3139	0.03865	NA	NA	2404	0.01082	3139	0.03865	NA	NA	2476	0.03378	cellular&nbsp;organisms>Bacteria>Terrabacteria&nbsp;group>Actinobacteria>Actinomycetia>Pseudonocardiales>Pseudonocardiaceae>Amycolatopsis
Fusobacterium sp. NSJ-57	S	2764326	3406	0.03852	NA	NA	NA	NA	1895	0.02333	3406	0.03852	1848	0.02521	cellular&nbsp;organisms>Bacteria>Fusobacteria>Fusobacteriia>Fusobacteriales>Fusobacteriaceae>Fusobacterium>unclassified&nbsp;Fusobacterium
Luteitalea pratensis	S	1855912	3124	0.03846	1454	0.009607	1927	0.008675	3124	0.03846	NA	NA	2754	0.03757	cellular&nbsp;organisms>Bacteria>Acidobacteria>Vicinamibacteria>Vicinamibacteraceae>Luteitalea
Lentzea guizhouensis	S	1586287	3327	0.03846	3327	0.02198	2021	0.009099	2359	0.02905	NA	NA	2819	0.03846	cellular&nbsp;organisms>Bacteria>Terrabacteria&nbsp;group>Actinobacteria>Actinomycetia>Pseudonocardiales>Pseudonocardiaceae>Lentzea
Bradyrhizobium sp. CCBAU 051011	S	858422	3170	0.03833	NA	NA	3170	0.01427	2121	0.02611	2516	0.02845	2810	0.03833	cellular&nbsp;organisms>Bacteria>Proteobacteria>Alphaproteobacteria>Hyphomicrobiales>Bradyrhizobiaceae>Bradyrhizobium>unclassified&nbsp;Bradyrhizobium
Liquorilactobacillus hordei	S	468911	3385	0.03828	NA	NA	NA	NA	NA	NA	3385	0.03828	NA	NA	cellular&nbsp;organisms>Bacteria>Terrabacteria&nbsp;group>Firmicutes>Bacilli>Lactobacillales>Lactobacillaceae>Liquorilactobacillus
Bacillus sp. FJAT-22090	S	1581038	5788	0.03824	5788	0.03824	2871	0.01293	NA	NA	3218	0.03639	1131	0.01543	cellular&nbsp;organisms>Bacteria>Terrabacteria&nbsp;group>Firmicutes>Bacilli>Bacillales>Bacillaceae>Bacillus>unclassified&nbsp;Bacillus&nbsp;(in:&nbsp;Bacteria)
Streptococcus mitis	S	28037	3367	0.03808	1971	0.01302	NA	NA	2151	0.02648	3367	0.03808	2400	0.03274	cellular&nbsp;organisms>Bacteria>Terrabacteria&nbsp;group>Firmicutes>Bacilli>Lactobacillales>Streptococcaceae>Streptococcus
Flavobacterium indicum	S	312277	8445	0.03802	5340	0.03528	8445	0.03802	NA	NA	1602	0.01812	1158	0.0158	cellular&nbsp;organisms>Bacteria>FCB&nbsp;group>Bacteroidetes/Chlorobi&nbsp;group>Bacteroidetes>Flavobacteriia>Flavobacteriales>Flavobacteriaceae>Flavobacterium
Acholeplasma axanthum	S	29552	3084	0.03797	1930	0.01275	1090	0.004907	3084	0.03797	2421	0.02738	2476	0.03378	cellular&nbsp;organisms>Bacteria>Terrabacteria&nbsp;group>Tenericutes>Mollicutes>Acholeplasmatales>Acholeplasmataceae>Acholeplasma
Hymenobacter sp. PAMC 26554	S	1484116	3082	0.03795	1708	0.01129	1730	0.007788	3082	0.03795	NA	NA	2646	0.0361	cellular&nbsp;organisms>Bacteria>FCB&nbsp;group>Bacteroidetes/Chlorobi&nbsp;group>Bacteroidetes>Cytophagia>Cytophagales>Hymenobacteraceae>Hymenobacter>unclassified&nbsp;Hymenobacter
Bacillus cytotoxicus	S	580165	3454	0.03792	3454	0.02282	2537	0.01142	1279	0.01575	3353	0.03792	NA	NA	cellular&nbsp;organisms>Bacteria>Terrabacteria&nbsp;group>Firmicutes>Bacilli>Bacillales>Bacillaceae>Bacillus>Bacillus&nbsp;cereus&nbsp;group
Arthrobacter agilis	S	37921	2772	0.03782	2148	0.01419	2380	0.01071	2647	0.03259	NA	NA	2772	0.03782	cellular&nbsp;organisms>Bacteria>Terrabacteria&nbsp;group>Actinobacteria>Actinomycetia>Micrococcales>Micrococcaceae>Arthrobacter
Frigoriglobus tundricola	S	2774151	3065	0.03774	1479	0.009772	1900	0.008554	3065	0.03774	NA	NA	2500	0.03411	cellular&nbsp;organisms>Bacteria>PVC&nbsp;group>Planctomycetes>Planctomycetia>Gemmatales>Gemmataceae>Frigoriglobus
Marivirga tractuosa	S	1006	3064	0.03773	2844	0.01879	2527	0.01138	3064	0.03773	2661	0.03009	2316	0.0316	cellular&nbsp;organisms>Bacteria>FCB&nbsp;group>Bacteroidetes/Chlorobi&nbsp;group>Bacteroidetes>Cytophagia>Cytophagales>Marivirgaceae>Marivirga
Flavobacterium psychrophilum	S	96345	6340	0.03767	5701	0.03767	6340	0.02854	1641	0.0202	2403	0.02718	1861	0.02539	cellular&nbsp;organisms>Bacteria>FCB&nbsp;group>Bacteroidetes/Chlorobi&nbsp;group>Bacteroidetes>Flavobacteriia>Flavobacteriales>Flavobacteriaceae>Flavobacterium
Selenomonas sp. oral taxon 920	S	1884263	2758	0.03763	NA	NA	1626	0.00732	2679	0.03299	2654	0.03002	2758	0.03763	cellular&nbsp;organisms>Bacteria>Terrabacteria&nbsp;group>Firmicutes>Negativicutes>Selenomonadales>Selenomonadaceae>Selenomonas>unclassified&nbsp;Selenomonas
Fretibacterium fastidiosum	S	651822	2757	0.03761	1416	0.009356	1728	0.007779	2503	0.03082	NA	NA	2757	0.03761	cellular&nbsp;organisms>Bacteria>Synergistetes>Synergistia>Synergistales>Synergistaceae>Fretibacterium
Chitinophaga agri	S	2703787	3052	0.03758	2138	0.01413	NA	NA	3052	0.03758	2835	0.03206	2534	0.03457	cellular&nbsp;organisms>Bacteria>FCB&nbsp;group>Bacteroidetes/Chlorobi&nbsp;group>Bacteroidetes>Chitinophagia>Chitinophagales>Chitinophagaceae>Chitinophaga
Paenibacillus sp. UniB2	S	2726185	2901	0.03758	NA	NA	2054	0.009247	2901	0.03572	NA	NA	2755	0.03758	cellular&nbsp;organisms>Bacteria>Terrabacteria&nbsp;group>Firmicutes>Bacilli>Bacillales>Paenibacillaceae>Paenibacillus>unclassified&nbsp;Paenibacillus
Chryseobacterium carnipullorum	S	1124835	5681	0.03754	5681	0.03754	3225	0.01452	1943	0.02392	NA	NA	NA	NA	cellular&nbsp;organisms>Bacteria>FCB&nbsp;group>Bacteroidetes/Chlorobi&nbsp;group>Bacteroidetes>Flavobacteriia>Flavobacteriales>Weeksellaceae>Chryseobacterium&nbsp;group>Chryseobacterium
Pontibacter sp. SGAir0037	S	2571030	3047	0.03752	1870	0.01236	1576	0.007095	3047	0.03752	2660	0.03008	2329	0.03177	cellular&nbsp;organisms>Bacteria>FCB&nbsp;group>Bacteroidetes/Chlorobi&nbsp;group>Bacteroidetes>Cytophagia>Cytophagales>Hymenobacteraceae>Pontibacter>unclassified&nbsp;Pontibacter
Pseudarthrobacter phenanthrenivorans	S	361575	5678	0.03752	5678	0.03752	NA	NA	NA	NA	NA	NA	NA	NA	cellular&nbsp;organisms>Bacteria>Terrabacteria&nbsp;group>Actinobacteria>Actinomycetia>Micrococcales>Micrococcaceae>Pseudarthrobacter
Actinomadura verrucosospora	S	46165	3045	0.03749	2569	0.01697	2581	0.01162	3045	0.03749	NA	NA	2733	0.03728	cellular&nbsp;organisms>Bacteria>Terrabacteria&nbsp;group>Actinobacteria>Actinomycetia>Streptosporangiales>Thermomonosporaceae>Actinomadura
Moorea producens	S	1155739	2939	0.03749	2149	0.0142	2107	0.009486	2939	0.03619	2105	0.02381	2748	0.03749	cellular&nbsp;organisms>Bacteria>Terrabacteria&nbsp;group>Cyanobacteria/Melainabacteria&nbsp;group>Cyanobacteria>Oscillatoriophycideae>Oscillatoriales>Oscillatoriaceae>Moorea
Streptococcus salivarius	S	1304	3314	0.03748	1852	0.01224	NA	NA	NA	NA	3314	0.03748	NA	NA	cellular&nbsp;organisms>Bacteria>Terrabacteria&nbsp;group>Firmicutes>Bacilli>Lactobacillales>Streptococcaceae>Streptococcus
Thermobacillus composti	S	377615	2995	0.03741	1633	0.01079	1931	0.008693	2995	0.03688	NA	NA	2742	0.03741	cellular&nbsp;organisms>Bacteria>Terrabacteria&nbsp;group>Firmicutes>Bacilli>Bacillales>Paenibacillaceae>Thermobacillus
Mageeibacillus indolicus	S	884684	2887	0.03738	NA	NA	NA	NA	2887	0.03555	1648	0.01864	2740	0.03738	cellular&nbsp;organisms>Bacteria>Terrabacteria&nbsp;group>Firmicutes>Clostridia>Eubacteriales>Oscillospiraceae>Mageeibacillus
Murdochiella vaginalis	S	1852373	2735	0.03731	1481	0.009785	NA	NA	2558	0.0315	2473	0.02797	2735	0.03731	cellular&nbsp;organisms>Bacteria>Terrabacteria&nbsp;group>Firmicutes>Tissierellia>Tissierellales>Peptoniphilaceae>Murdochiella
Microbacterium oxydans	S	82380	2734	0.0373	NA	NA	NA	NA	2482	0.03056	NA	NA	2734	0.0373	cellular&nbsp;organisms>Bacteria>Terrabacteria&nbsp;group>Actinobacteria>Actinomycetia>Micrococcales>Microbacteriaceae>Microbacterium
Amniculibacterium sp. G2-70	S	2767188	5641	0.03727	5641	0.03727	3209	0.01445	3013	0.0371	2223	0.02514	NA	NA	cellular&nbsp;organisms>Bacteria>FCB&nbsp;group>Bacteroidetes/Chlorobi&nbsp;group>Bacteroidetes>Flavobacteriia>Flavobacteriales>Flavobacteriaceae>Amniculibacterium>unclassified&nbsp;Amniculibacterium
Massilia sp. WG5	S	1707785	2725	0.03718	2277	0.01504	NA	NA	2590	0.03189	NA	NA	2725	0.03718	cellular&nbsp;organisms>Bacteria>Proteobacteria>Betaproteobacteria>Burkholderiales>Oxalobacteraceae>Massilia>unclassified&nbsp;Massilia
Mucilaginibacter mali	S	2740462	3287	0.03717	1452	0.009594	1307	0.005884	2596	0.03196	3287	0.03717	1845	0.02517	cellular&nbsp;organisms>Bacteria>FCB&nbsp;group>Bacteroidetes/Chlorobi&nbsp;group>Bacteroidetes>Sphingobacteriia>Sphingobacteriales>Sphingobacteriaceae>Mucilaginibacter
Olivibacter sp. SDN3	S	2764720	3018	0.03716	1667	0.01101	1443	0.006496	3018	0.03716	2786	0.03151	2148	0.0293	cellular&nbsp;organisms>Bacteria>FCB&nbsp;group>Bacteroidetes/Chlorobi&nbsp;group>Bacteroidetes>Sphingobacteriia>Sphingobacteriales>Sphingobacteriaceae>Olivibacter>unclassified&nbsp;Olivibacter
Clostridium cochlearium	S	1494	3272	0.037	1456	0.00962	NA	NA	1581	0.01947	3272	0.037	1517	0.0207	cellular&nbsp;organisms>Bacteria>Terrabacteria&nbsp;group>Firmicutes>Clostridia>Eubacteriales>Clostridiaceae>Clostridium
Chondromyces crocatus	S	52	2707	0.03693	1329	0.008781	1736	0.007815	2602	0.03204	NA	NA	2707	0.03693	cellular&nbsp;organisms>Bacteria>Proteobacteria>delta/epsilon&nbsp;subdivisions>Deltaproteobacteria>Myxococcales>Sorangiineae>Polyangiaceae>Chondromyces
Candidatus Erwinia haradaeae	S	1922217	2707	0.03693	2346	0.0155	1365	0.006145	2541	0.03129	2421	0.02738	2707	0.03693	cellular&nbsp;organisms>Bacteria>Proteobacteria>Gammaproteobacteria>Enterobacterales>Erwiniaceae>Erwinia
Pectinatus frisingensis	S	865	3265	0.03693	NA	NA	NA	NA	1253	0.01543	3265	0.03693	1968	0.02685	cellular&nbsp;organisms>Bacteria>Terrabacteria&nbsp;group>Firmicutes>Negativicutes>Selenomonadales>Selenomonadaceae>Pectinatus
Campylobacter hyointestinalis	S	198	2706	0.03692	NA	NA	NA	NA	2417	0.02976	1498	0.01694	2706	0.03692	cellular&nbsp;organisms>Bacteria>Proteobacteria>delta/epsilon&nbsp;subdivisions>Epsilonproteobacteria>Campylobacterales>Campylobacteraceae>Campylobacter
Dysgonomonas sp. HDW5A	S	2714926	4753	0.0369	4753	0.0314	NA	NA	2997	0.0369	2822	0.03192	NA	NA	cellular&nbsp;organisms>Bacteria>FCB&nbsp;group>Bacteroidetes/Chlorobi&nbsp;group>Bacteroidetes>Bacteroidia>Bacteroidales>Dysgonomonadaceae>Dysgonomonas>unclassified&nbsp;Dysgonomonas
Frankia inefficax	S	298654	2704	0.03689	1924	0.01271	2378	0.01071	2695	0.03318	NA	NA	2704	0.03689	cellular&nbsp;organisms>Bacteria>Terrabacteria&nbsp;group>Actinobacteria>Actinomycetia>Frankiales>Frankiaceae>Frankia
Novosphingobium sp. P6W	S	1609758	5571	0.03681	5571	0.03681	NA	NA	NA	NA	NA	NA	NA	NA	cellular&nbsp;organisms>Bacteria>Proteobacteria>Alphaproteobacteria>Sphingomonadales>Sphingomonadaceae>Novosphingobium>unclassified&nbsp;Novosphingobium
Archangium gephyra	S	48	2981	0.0367	1725	0.0114	1906	0.008581	2981	0.0367	NA	NA	2364	0.03225	cellular&nbsp;organisms>Bacteria>Proteobacteria>delta/epsilon&nbsp;subdivisions>Deltaproteobacteria>Myxococcales>Cystobacterineae>Archangiaceae>Archangium
Hymenobacter sedentarius	S	1411621	2980	0.03669	1768	0.01168	1626	0.00732	2980	0.03669	NA	NA	2367	0.03229	cellular&nbsp;organisms>Bacteria>FCB&nbsp;group>Bacteroidetes/Chlorobi&nbsp;group>Bacteroidetes>Cytophagia>Cytophagales>Hymenobacteraceae>Hymenobacter
Streptococcus constellatus	S	76860	3242	0.03667	NA	NA	NA	NA	NA	NA	3242	0.03667	NA	NA	cellular&nbsp;organisms>Bacteria>Terrabacteria&nbsp;group>Firmicutes>Bacilli>Lactobacillales>Streptococcaceae>Streptococcus>Streptococcus&nbsp;anginosus&nbsp;group
Sulfitobacter pseudonitzschiae	S	1402135	2685	0.03663	NA	NA	NA	NA	1794	0.02209	NA	NA	2685	0.03663	cellular&nbsp;organisms>Bacteria>Proteobacteria>Alphaproteobacteria>Rhodobacterales>Rhodobacteraceae>Sulfitobacter
Streptosporangium roseum	S	2001	2681	0.03657	2079	0.01374	2020	0.009094	2420	0.0298	NA	NA	2681	0.03657	cellular&nbsp;organisms>Bacteria>Terrabacteria&nbsp;group>Actinobacteria>Actinomycetia>Streptosporangiales>Streptosporangiaceae>Streptosporangium
Hydrogenophaga sp. BA0156	S	2716225	2768	0.03652	NA	NA	1875	0.008441	2768	0.03408	NA	NA	2677	0.03652	cellular&nbsp;organisms>Bacteria>Proteobacteria>Betaproteobacteria>Burkholderiales>Comamonadaceae>Hydrogenophaga>unclassified&nbsp;Hydrogenophaga
Mucilaginibacter gotjawali	S	1550579	2674	0.03648	1704	0.01126	1434	0.006456	2167	0.02668	1657	0.01874	2674	0.03648	cellular&nbsp;organisms>Bacteria>FCB&nbsp;group>Bacteroidetes/Chlorobi&nbsp;group>Bacteroidetes>Sphingobacteriia>Sphingobacteriales>Sphingobacteriaceae>Mucilaginibacter
Epibacterium mobile	S	379347	2667	0.03638	NA	NA	NA	NA	1831	0.02254	NA	NA	2667	0.03638	cellular&nbsp;organisms>Bacteria>Proteobacteria>Alphaproteobacteria>Rhodobacterales>Rhodobacteraceae>Epibacterium
Nonomuraea nitratireducens	S	2656914	2943	0.03636	1911	0.01263	2361	0.01063	2943	0.03624	NA	NA	2665	0.03636	cellular&nbsp;organisms>Bacteria>Terrabacteria&nbsp;group>Actinobacteria>Actinomycetia>Streptosporangiales>Streptosporangiaceae>Nonomuraea
Epidermidibacterium keratini	S	1891644	2664	0.03634	NA	NA	NA	NA	2519	0.03102	NA	NA	2664	0.03634	cellular&nbsp;organisms>Bacteria>Terrabacteria&nbsp;group>Actinobacteria>Actinomycetia>Sporichthyales>Sporichthyaceae>Epidermidibacterium
Azoarcus communis	S	41977	2662	0.03632	NA	NA	NA	NA	2485	0.0306	NA	NA	2662	0.03632	cellular&nbsp;organisms>Bacteria>Proteobacteria>Betaproteobacteria>Rhodocyclales>Zoogloeaceae>Azoarcus
Psychrobacillus glaciei	S	2283160	5494	0.0363	5494	0.0363	2897	0.01304	1368	0.01684	2293	0.02593	1266	0.01727	cellular&nbsp;organisms>Bacteria>Terrabacteria&nbsp;group>Firmicutes>Bacilli>Bacillales>Bacillaceae>Psychrobacillus
Streptomyces sp. W1SF4	S	2305220	3163	0.03629	NA	NA	3163	0.01424	2421	0.02981	NA	NA	2660	0.03629	cellular&nbsp;organisms>Bacteria>Terrabacteria&nbsp;group>Actinobacteria>Actinomycetia>Streptomycetales>Streptomycetaceae>Streptomyces>unclassified&nbsp;Streptomyces
Macrococcus caseolyticus	S	69966	3207	0.03627	NA	NA	NA	NA	2177	0.0268	3207	0.03627	NA	NA	cellular&nbsp;organisms>Bacteria>Terrabacteria&nbsp;group>Firmicutes>Bacilli>Bacillales>Staphylococcaceae>Macrococcus
Faecalibaculum rodentium	S	1702221	2657	0.03625	1469	0.009706	1318	0.005934	1987	0.02447	1618	0.0183	2657	0.03625	cellular&nbsp;organisms>Bacteria>Terrabacteria&nbsp;group>Firmicutes>Erysipelotrichia>Erysipelotrichales>Erysipelotrichaceae>Faecalibaculum
Streptomyces sp. TN58	S	234612	2937	0.03616	NA	NA	NA	NA	2937	0.03616	NA	NA	NA	NA	cellular&nbsp;organisms>Bacteria>Terrabacteria&nbsp;group>Actinobacteria>Actinomycetia>Streptomycetales>Streptomycetaceae>Streptomyces>unclassified&nbsp;Streptomyces
Flavobacterium album	S	2175091	2936	0.03615	1927	0.01273	2029	0.009135	2936	0.03615	1718	0.01943	2551	0.0348	cellular&nbsp;organisms>Bacteria>FCB&nbsp;group>Bacteroidetes/Chlorobi&nbsp;group>Bacteroidetes>Flavobacteriia>Flavobacteriales>Flavobacteriaceae>Flavobacterium
Saccharopolyspora erythraea	S	1836	2848	0.03612	NA	NA	2344	0.01055	2848	0.03507	NA	NA	2648	0.03612	cellular&nbsp;organisms>Bacteria>Terrabacteria&nbsp;group>Actinobacteria>Actinomycetia>Pseudonocardiales>Pseudonocardiaceae>Saccharopolyspora
Polaribacter sp. SM13	S	2818493	2924	0.0361	2417	0.01597	2924	0.01316	1977	0.02434	1159	0.01311	2646	0.0361	cellular&nbsp;organisms>Bacteria>FCB&nbsp;group>Bacteroidetes/Chlorobi&nbsp;group>Bacteroidetes>Flavobacteriia>Flavobacteriales>Flavobacteriaceae>Polaribacter>unclassified&nbsp;Polaribacter
Tautonia plasticadhaerens	S	2527974	2645	0.03608	1268	0.008378	1620	0.007293	2418	0.02977	NA	NA	2645	0.03608	cellular&nbsp;organisms>Bacteria>PVC&nbsp;group>Planctomycetes>Planctomycetia>Isosphaerales>Isosphaeraceae>Tautonia
Xanthomonas oryzae	S	347	2644	0.03607	NA	NA	NA	NA	2125	0.02616	NA	NA	2644	0.03607	cellular&nbsp;organisms>Bacteria>Proteobacteria>Gammaproteobacteria>Xanthomonadales>Xanthomonadaceae>Xanthomonas
Microterricola viridarii	S	412690	2925	0.03601	NA	NA	2587	0.01165	2925	0.03601	NA	NA	2578	0.03517	cellular&nbsp;organisms>Bacteria>Terrabacteria&nbsp;group>Actinobacteria>Actinomycetia>Micrococcales>Microbacteriaceae>Microterricola
Actinomyces sp. ZJ750	S	2744574	2634	0.03593	NA	NA	NA	NA	NA	NA	NA	NA	2634	0.03593	cellular&nbsp;organisms>Bacteria>Terrabacteria&nbsp;group>Actinobacteria>Actinomycetia>Actinomycetales>Actinomycetaceae>Actinomyces>unclassified&nbsp;Actinomyces
Novosphingobium resinovorum	S	158500	2887	0.03592	NA	NA	NA	NA	2887	0.03555	NA	NA	2633	0.03592	cellular&nbsp;organisms>Bacteria>Proteobacteria>Alphaproteobacteria>Sphingomonadales>Sphingomonadaceae>Novosphingobium
Alkaliphilus metalliredigens	S	208226	3172	0.03587	1133	0.007486	NA	NA	1950	0.02401	3172	0.03587	1751	0.02389	cellular&nbsp;organisms>Bacteria>Terrabacteria&nbsp;group>Firmicutes>Clostridia>Eubacteriales>Clostridiaceae>Alkaliphilus
Winogradskyella sp. PC-19	S	754417	5426	0.03585	5426	0.03585	4800	0.02161	1599	0.01969	1931	0.02184	NA	NA	cellular&nbsp;organisms>Bacteria>FCB&nbsp;group>Bacteroidetes/Chlorobi&nbsp;group>Bacteroidetes>Flavobacteriia>Flavobacteriales>Flavobacteriaceae>Winogradskyella>unclassified&nbsp;Winogradskyella
Desulfovibrio alaskensis	S	58180	2690	0.03585	NA	NA	NA	NA	2690	0.03312	NA	NA	2628	0.03585	cellular&nbsp;organisms>Bacteria>Proteobacteria>delta/epsilon&nbsp;subdivisions>Deltaproteobacteria>Desulfovibrionales>Desulfovibrionaceae>Desulfovibrio
Haliangium ochraceum	S	80816	2902	0.03573	1623	0.01072	1879	0.008459	2902	0.03573	NA	NA	2592	0.03536	cellular&nbsp;organisms>Bacteria>Proteobacteria>delta/epsilon&nbsp;subdivisions>Deltaproteobacteria>Myxococcales>Nannocystineae>Kofleriaceae>Haliangium
Streptomyces vietnamensis	S	362257	2707	0.03567	NA	NA	NA	NA	2707	0.03333	NA	NA	2615	0.03567	cellular&nbsp;organisms>Bacteria>Terrabacteria&nbsp;group>Actinobacteria>Actinomycetia>Streptomycetales>Streptomycetaceae>Streptomyces
Rathayibacter festucae	S	110937	2894	0.03563	NA	NA	NA	NA	2894	0.03563	NA	NA	2590	0.03533	cellular&nbsp;organisms>Bacteria>Terrabacteria&nbsp;group>Actinobacteria>Actinomycetia>Micrococcales>Microbacteriaceae>Rathayibacter
Hymenobacter sp. DG01	S	2584940	2682	0.03562	1923	0.01271	NA	NA	2682	0.03302	2438	0.02757	2611	0.03562	cellular&nbsp;organisms>Bacteria>FCB&nbsp;group>Bacteroidetes/Chlorobi&nbsp;group>Bacteroidetes>Cytophagia>Cytophagales>Hymenobacteraceae>Hymenobacter>unclassified&nbsp;Hymenobacter
Lactobacillus jensenii	S	109790	3145	0.03557	NA	NA	NA	NA	1799	0.02215	3145	0.03557	1585	0.02162	cellular&nbsp;organisms>Bacteria>Terrabacteria&nbsp;group>Firmicutes>Bacilli>Lactobacillales>Lactobacillaceae>Lactobacillus
Salegentibacter sp. T436	S	1729720	5377	0.03553	5377	0.03553	5322	0.02396	NA	NA	1849	0.02091	NA	NA	cellular&nbsp;organisms>Bacteria>FCB&nbsp;group>Bacteroidetes/Chlorobi&nbsp;group>Bacteroidetes>Flavobacteriia>Flavobacteriales>Flavobacteriaceae>Salegentibacter>unclassified&nbsp;Salegentibacter
Nibricoccus aquaticus	S	2576891	2883	0.0355	1549	0.01023	1737	0.00782	2883	0.0355	NA	NA	2349	0.03205	cellular&nbsp;organisms>Bacteria>PVC&nbsp;group>Verrucomicrobia>Opitutae>Opitutales>Opitutaceae>Nibricoccus
Paenibacillus sp. FSL H7-0737	S	1536775	3135	0.03546	NA	NA	3052	0.01374	NA	NA	3135	0.03546	NA	NA	cellular&nbsp;organisms>Bacteria>Terrabacteria&nbsp;group>Firmicutes>Bacilli>Bacillales>Paenibacillaceae>Paenibacillus>unclassified&nbsp;Paenibacillus
Achromobacter denitrificans	S	32002	2769	0.03544	NA	NA	1983	0.008927	2769	0.03409	NA	NA	2598	0.03544	cellular&nbsp;organisms>Bacteria>Proteobacteria>Betaproteobacteria>Burkholderiales>Alcaligenaceae>Achromobacter
Kaistella carnis	S	1241979	3828	0.03541	3828	0.02529	3085	0.01389	1285	0.01582	3131	0.03541	NA	NA	cellular&nbsp;organisms>Bacteria>FCB&nbsp;group>Bacteroidetes/Chlorobi&nbsp;group>Bacteroidetes>Flavobacteriia>Flavobacteriales>Weeksellaceae>Chryseobacterium&nbsp;group>Kaistella
Hymenobacter busanensis	S	2607656	2595	0.0354	1598	0.01056	1653	0.007442	2548	0.03137	NA	NA	2595	0.0354	cellular&nbsp;organisms>Bacteria>FCB&nbsp;group>Bacteroidetes/Chlorobi&nbsp;group>Bacteroidetes>Cytophagia>Cytophagales>Hymenobacteraceae>Hymenobacter
Jiangella alkaliphila	S	419479	2584	0.03525	2119	0.014	2176	0.009796	2337	0.02877	NA	NA	2584	0.03525	cellular&nbsp;organisms>Bacteria>Terrabacteria&nbsp;group>Actinobacteria>Actinomycetia>Jiangellales>Jiangellaceae>Jiangella
Pantoea dispersa	S	59814	2581	0.03521	NA	NA	1293	0.005821	NA	NA	NA	NA	2581	0.03521	cellular&nbsp;organisms>Bacteria>Proteobacteria>Gammaproteobacteria>Enterobacterales>Erwiniaceae>Pantoea
Fastidiosipila sanguinis	S	236753	3111	0.03518	1348	0.008907	NA	NA	2552	0.03142	3111	0.03518	2498	0.03408	cellular&nbsp;organisms>Bacteria>Terrabacteria&nbsp;group>Firmicutes>Clostridia>Eubacteriales>Oscillospiraceae>Fastidiosipila
Chryseobacterium sp. T16E-39	S	2015076	5322	0.03516	5322	0.03516	4327	0.01948	1221	0.01503	1739	0.01967	1425	0.01944	cellular&nbsp;organisms>Bacteria>FCB&nbsp;group>Bacteroidetes/Chlorobi&nbsp;group>Bacteroidetes>Flavobacteriia>Flavobacteriales>Weeksellaceae>Chryseobacterium&nbsp;group>Chryseobacterium>unclassified&nbsp;Chryseobacterium
Tessaracoccus aquimaris	S	1332264	2744	0.03516	NA	NA	NA	NA	2744	0.03379	NA	NA	2577	0.03516	cellular&nbsp;organisms>Bacteria>Terrabacteria&nbsp;group>Actinobacteria>Actinomycetia>Propionibacteriales>Propionibacteriaceae>Tessaracoccus
Chryseobacterium sp. SNU WT5	S	2594269	5320	0.03515	5320	0.03515	4138	0.01863	NA	NA	1606	0.01816	NA	NA	cellular&nbsp;organisms>Bacteria>FCB&nbsp;group>Bacteroidetes/Chlorobi&nbsp;group>Bacteroidetes>Flavobacteriia>Flavobacteriales>Weeksellaceae>Chryseobacterium&nbsp;group>Chryseobacterium>unclassified&nbsp;Chryseobacterium
Carnobacterium sp. CP1	S	1564681	5318	0.03514	5318	0.03514	NA	NA	NA	NA	NA	NA	NA	NA	cellular&nbsp;organisms>Bacteria>Terrabacteria&nbsp;group>Firmicutes>Bacilli>Lactobacillales>Carnobacteriaceae>Carnobacterium>unclassified&nbsp;Carnobacterium
Cupriavidus oxalaticus	S	96344	2731	0.03513	1624	0.01073	1781	0.008018	2731	0.03363	NA	NA	2575	0.03513	cellular&nbsp;organisms>Bacteria>Proteobacteria>Betaproteobacteria>Burkholderiales>Burkholderiaceae>Cupriavidus
Chryseobacterium sp. G0186	S	2487064	5313	0.0351	5313	0.0351	3185	0.01434	2260	0.02783	2848	0.03221	NA	NA	cellular&nbsp;organisms>Bacteria>FCB&nbsp;group>Bacteroidetes/Chlorobi&nbsp;group>Bacteroidetes>Flavobacteriia>Flavobacteriales>Weeksellaceae>Chryseobacterium&nbsp;group>Chryseobacterium>unclassified&nbsp;Chryseobacterium
Acetobacterium woodii	S	33952	3100	0.03506	1157	0.007645	NA	NA	1844	0.0227	3100	0.03506	1868	0.02548	cellular&nbsp;organisms>Bacteria>Terrabacteria&nbsp;group>Firmicutes>Clostridia>Eubacteriales>Eubacteriaceae>Acetobacterium
Winogradskyella forsetii	S	2686077	5291	0.03496	5291	0.03496	4963	0.02234	1820	0.02241	2872	0.03248	2082	0.0284	cellular&nbsp;organisms>Bacteria>FCB&nbsp;group>Bacteroidetes/Chlorobi&nbsp;group>Bacteroidetes>Flavobacteriia>Flavobacteriales>Flavobacteriaceae>Winogradskyella
Sphingobacterium daejeonense	S	371142	5291	0.03496	5291	0.03496	3757	0.01691	1750	0.02155	2021	0.02286	1282	0.01749	cellular&nbsp;organisms>Bacteria>FCB&nbsp;group>Bacteroidetes/Chlorobi&nbsp;group>Bacteroidetes>Sphingobacteriia>Sphingobacteriales>Sphingobacteriaceae>Sphingobacterium
Actinoplanes sp. N902-109	S	649831	2562	0.03495	NA	NA	2050	0.009229	2463	0.03033	NA	NA	2562	0.03495	cellular&nbsp;organisms>Bacteria>Terrabacteria&nbsp;group>Actinobacteria>Actinomycetia>Micromonosporales>Micromonosporaceae>Actinoplanes>unclassified&nbsp;Actinoplanes
Streptomyces sp. fd1-xmd	S	1812480	2833	0.03488	NA	NA	NA	NA	2833	0.03488	NA	NA	NA	NA	cellular&nbsp;organisms>Bacteria>Terrabacteria&nbsp;group>Actinobacteria>Actinomycetia>Streptomycetales>Streptomycetaceae>Streptomyces>unclassified&nbsp;Streptomyces
Polaribacter sp. L12M9	S	2738844	5864	0.03483	5271	0.03483	5864	0.0264	NA	NA	2678	0.03029	NA	NA	cellular&nbsp;organisms>Bacteria>FCB&nbsp;group>Bacteroidetes/Chlorobi&nbsp;group>Bacteroidetes>Flavobacteriia>Flavobacteriales>Flavobacteriaceae>Polaribacter>unclassified&nbsp;Polaribacter
Weissella cibaria	S	137591	5264	0.03478	5264	0.03478	NA	NA	NA	NA	2207	0.02496	NA	NA	cellular&nbsp;organisms>Bacteria>Terrabacteria&nbsp;group>Firmicutes>Bacilli>Lactobacillales>Lactobacillaceae>Weissella
Salinibacter ruber	S	146919	2824	0.03477	1371	0.009059	1708	0.007689	2824	0.03477	NA	NA	2492	0.034	cellular&nbsp;organisms>Bacteria>FCB&nbsp;group>Bacteroidetes/Chlorobi&nbsp;group>Bacteroidetes>Bacteroidetes&nbsp;Order&nbsp;II.&nbsp;Incertae&nbsp;sedis>Rhodothermaceae>Salinibacter
Rhizobium sp. NXC24	S	2048897	2546	0.03473	NA	NA	NA	NA	NA	NA	NA	NA	2546	0.03473	cellular&nbsp;organisms>Bacteria>Proteobacteria>Alphaproteobacteria>Hyphomicrobiales>Rhizobiaceae>Rhizobium/Agrobacterium&nbsp;group>Rhizobium>unclassified&nbsp;Rhizobium
Pseudomonas balearica	S	74829	2545	0.03472	NA	NA	NA	NA	NA	NA	NA	NA	2545	0.03472	cellular&nbsp;organisms>Bacteria>Proteobacteria>Gammaproteobacteria>Pseudomonadales>Pseudomonadaceae>Pseudomonas>Pseudomonas&nbsp;stutzeri&nbsp;group
Shinella sp. HZN7	S	879274	2541	0.03466	NA	NA	NA	NA	2516	0.03098	NA	NA	2541	0.03466	cellular&nbsp;organisms>Bacteria>Proteobacteria>Alphaproteobacteria>Hyphomicrobiales>Rhizobiaceae>Shinella>unclassified&nbsp;Shinella
Actinomadura sp. WMMB 499	S	1219491	2814	0.03465	NA	NA	2107	0.009486	2814	0.03465	NA	NA	2308	0.03149	cellular&nbsp;organisms>Bacteria>Terrabacteria&nbsp;group>Actinobacteria>Actinomycetia>Streptosporangiales>Thermomonosporaceae>Actinomadura>unclassified&nbsp;Actinomadura
Streptomyces griseorubiginosus	S	67304	3282	0.03458	3282	0.02169	2160	0.009724	2689	0.03311	NA	NA	2535	0.03458	cellular&nbsp;organisms>Bacteria>Terrabacteria&nbsp;group>Actinobacteria>Actinomycetia>Streptomycetales>Streptomycetaceae>Streptomyces
Mycobacterium sp. JS623	S	212767	2534	0.03457	NA	NA	NA	NA	1917	0.0236	NA	NA	2534	0.03457	cellular&nbsp;organisms>Bacteria>Terrabacteria&nbsp;group>Actinobacteria>Actinomycetia>Corynebacteriales>Mycobacteriaceae>Mycobacterium>unclassified&nbsp;Mycobacterium
Peptoclostridium acidaminophilum	S	1731	3053	0.03453	1443	0.009534	1301	0.005857	2761	0.034	3053	0.03453	2347	0.03202	cellular&nbsp;organisms>Bacteria>Terrabacteria&nbsp;group>Firmicutes>Clostridia>Eubacteriales>Peptostreptococcaceae>Peptoclostridium
Terriglobus roseus	S	392734	2802	0.0345	1813	0.01198	1819	0.008189	2802	0.0345	NA	NA	2516	0.03432	cellular&nbsp;organisms>Bacteria>Acidobacteria>Acidobacteriia>Acidobacteriales>Acidobacteriaceae>Terriglobus
Macrococcus canis	S	1855823	3235	0.03448	3235	0.02137	2779	0.01251	2067	0.02545	3049	0.03448	2484	0.03389	cellular&nbsp;organisms>Bacteria>Terrabacteria&nbsp;group>Firmicutes>Bacilli>Bacillales>Staphylococcaceae>Macrococcus
Leifsonia xyli	S	1575	2527	0.03447	NA	NA	2356	0.01061	2412	0.0297	NA	NA	2527	0.03447	cellular&nbsp;organisms>Bacteria>Terrabacteria&nbsp;group>Actinobacteria>Actinomycetia>Micrococcales>Microbacteriaceae>Leifsonia
Conexibacter sp. SYSU D00693	S	2812560	2651	0.03443	1271	0.008398	1753	0.007892	2651	0.03264	NA	NA	2524	0.03443	cellular&nbsp;organisms>Bacteria>Terrabacteria&nbsp;group>Actinobacteria>Thermoleophilia>Solirubrobacterales>Conexibacteraceae>Conexibacter>unclassified&nbsp;Conexibacter
Symbiobacterium thermophilum	S	2734	2521	0.03439	1166	0.007704	1467	0.006604	2230	0.02746	NA	NA	2521	0.03439	cellular&nbsp;organisms>Bacteria>Terrabacteria&nbsp;group>Firmicutes>Clostridia>Eubacteriales>Symbiobacteriaceae>Symbiobacterium
Eubacterium callanderi	S	53442	2941	0.03438	NA	NA	NA	NA	1944	0.02394	2941	0.03326	2520	0.03438	cellular&nbsp;organisms>Bacteria>Terrabacteria&nbsp;group>Firmicutes>Clostridia>Eubacteriales>Eubacteriaceae>Eubacterium
Sphaerochaeta globosa	S	1131703	2791	0.03436	1655	0.01094	1605	0.007226	2791	0.03436	2358	0.02667	2477	0.03379	cellular&nbsp;organisms>Bacteria>Spirochaetes>Spirochaetia>Spirochaetales>Spirochaetaceae>Sphaerochaeta
Flammeovirga pectinis	S	2494373	3219	0.03434	3219	0.02127	2762	0.01243	2099	0.02584	3036	0.03434	2001	0.0273	cellular&nbsp;organisms>Bacteria>FCB&nbsp;group>Bacteroidetes/Chlorobi&nbsp;group>Bacteroidetes>Cytophagia>Cytophagales>Flammeovirgaceae>Flammeovirga
Fibrella aestuarina	S	651143	2774	0.03432	1426	0.009422	NA	NA	2774	0.03416	1237	0.01399	2516	0.03432	cellular&nbsp;organisms>Bacteria>FCB&nbsp;group>Bacteroidetes/Chlorobi&nbsp;group>Bacteroidetes>Cytophagia>Cytophagales>Cytophagaceae>Fibrella
Rufibacter radiotolerans	S	1379910	2798	0.03428	2798	0.01849	2248	0.01012	2784	0.03428	1132	0.0128	2507	0.0342	cellular&nbsp;organisms>Bacteria>FCB&nbsp;group>Bacteroidetes/Chlorobi&nbsp;group>Bacteroidetes>Cytophagia>Cytophagales>Hymenobacteraceae>Rufibacter
Cellulomonas sp. PSBB021	S	2003551	2513	0.03428	NA	NA	NA	NA	2122	0.02613	NA	NA	2513	0.03428	cellular&nbsp;organisms>Bacteria>Terrabacteria&nbsp;group>Actinobacteria>Actinomycetia>Micrococcales>Cellulomonadaceae>Cellulomonas>unclassified&nbsp;Cellulomonas
Aeromonas media	S	651	2783	0.03427	NA	NA	NA	NA	2783	0.03427	NA	NA	NA	NA	cellular&nbsp;organisms>Bacteria>Proteobacteria>Gammaproteobacteria>Aeromonadales>Aeromonadaceae>Aeromonas
Actinomadura sp. WMMA1423	S	2591108	2509	0.03423	1980	0.01308	1864	0.008392	2255	0.02776	NA	NA	2509	0.03423	cellular&nbsp;organisms>Bacteria>Terrabacteria&nbsp;group>Actinobacteria>Actinomycetia>Streptosporangiales>Thermomonosporaceae>Actinomadura>unclassified&nbsp;Actinomadura
Tetragenococcus halophilus	S	51669	2508	0.03421	1851	0.01223	NA	NA	2366	0.02913	2428	0.02746	2508	0.03421	cellular&nbsp;organisms>Bacteria>Terrabacteria&nbsp;group>Firmicutes>Bacilli>Lactobacillales>Enterococcaceae>Tetragenococcus
Geobacter sp. M18	S	443143	2507	0.0342	2247	0.01485	2345	0.01056	2365	0.02912	NA	NA	2507	0.0342	cellular&nbsp;organisms>Bacteria>Proteobacteria>delta/epsilon&nbsp;subdivisions>Deltaproteobacteria>Desulfuromonadales>Geobacteraceae>Geobacter>unclassified&nbsp;Geobacter
Cystobacter fuscus	S	43	2707	0.03415	1606	0.01061	1983	0.008927	2707	0.03333	NA	NA	2503	0.03415	cellular&nbsp;organisms>Bacteria>Proteobacteria>delta/epsilon&nbsp;subdivisions>Deltaproteobacteria>Myxococcales>Cystobacterineae>Archangiaceae>Cystobacter
Flammeovirga sp. MY04	S	1191459	2772	0.03413	2571	0.01699	1839	0.008279	2772	0.03413	2759	0.0312	2389	0.03259	cellular&nbsp;organisms>Bacteria>FCB&nbsp;group>Bacteroidetes/Chlorobi&nbsp;group>Bacteroidetes>Cytophagia>Cytophagales>Flammeovirgaceae>Flammeovirga>unclassified&nbsp;Flammeovirga
Enterococcus saigonensis	S	1805431	3017	0.03412	NA	NA	NA	NA	NA	NA	3017	0.03412	NA	NA	cellular&nbsp;organisms>Bacteria>Terrabacteria&nbsp;group>Firmicutes>Bacilli>Lactobacillales>Enterococcaceae>Enterococcus
Apibacter raozihei	S	2500547	5419	0.0341	5161	0.0341	5419	0.0244	1154	0.01421	NA	NA	NA	NA	cellular&nbsp;organisms>Bacteria>FCB&nbsp;group>Bacteroidetes/Chlorobi&nbsp;group>Bacteroidetes>Flavobacteriia>Flavobacteriales>Weeksellaceae>Apibacter
Candidatus Campylobacter infans	S	2561898	2769	0.03409	NA	NA	NA	NA	2769	0.03409	NA	NA	1234	0.01683	cellular&nbsp;organisms>Bacteria>Proteobacteria>delta/epsilon&nbsp;subdivisions>Epsilonproteobacteria>Campylobacterales>Campylobacteraceae>Campylobacter
Erysipelothrix larvae	S	1514105	2769	0.03409	1692	0.01118	1571	0.007073	2769	0.03409	2023	0.02288	2420	0.03301	cellular&nbsp;organisms>Bacteria>Terrabacteria&nbsp;group>Firmicutes>Erysipelotrichia>Erysipelotrichales>Erysipelotrichaceae>Erysipelothrix
Bacillus cohnii	S	33932	3013	0.03408	2977	0.01967	1989	0.008954	1237	0.01523	3013	0.03408	1335	0.01821	cellular&nbsp;organisms>Bacteria>Terrabacteria&nbsp;group>Firmicutes>Bacilli>Bacillales>Bacillaceae>Bacillus
Ensifer adhaerens	S	106592	2522	0.03404	NA	NA	2123	0.009558	2522	0.03105	NA	NA	2495	0.03404	cellular&nbsp;organisms>Bacteria>Proteobacteria>Alphaproteobacteria>Hyphomicrobiales>Rhizobiaceae>Sinorhizobium/Ensifer&nbsp;group>Ensifer
Burkholderia stabilis	S	95485	2764	0.03403	NA	NA	NA	NA	2764	0.03403	NA	NA	2435	0.03322	cellular&nbsp;organisms>Bacteria>Proteobacteria>Betaproteobacteria>Burkholderiales>Burkholderiaceae>Burkholderia>Burkholderia&nbsp;cepacia&nbsp;complex
Massilia putida	S	1141883	2486	0.03391	1951	0.01289	2078	0.009355	2240	0.02758	NA	NA	2486	0.03391	cellular&nbsp;organisms>Bacteria>Proteobacteria>Betaproteobacteria>Burkholderiales>Oxalobacteraceae>Massilia
Bernardetia litoralis	S	999	2484	0.03389	2278	0.01505	1468	0.006609	2014	0.0248	2262	0.02558	2484	0.03389	cellular&nbsp;organisms>Bacteria>FCB&nbsp;group>Bacteroidetes/Chlorobi&nbsp;group>Bacteroidetes>Cytophagia>Cytophagales>Bernardetiaceae>Bernardetia
Azospira restricta	S	404405	2520	0.03389	NA	NA	NA	NA	2520	0.03103	NA	NA	2484	0.03389	cellular&nbsp;organisms>Bacteria>Proteobacteria>Betaproteobacteria>Rhodocyclales>Rhodocyclaceae>Azospira
Rhodoferax koreense	S	1842727	2482	0.03386	NA	NA	1412	0.006357	2338	0.02879	NA	NA	2482	0.03386	cellular&nbsp;organisms>Bacteria>Proteobacteria>Betaproteobacteria>Burkholderiales>Comamonadaceae>Rhodoferax
Maioricimonas rarisocia	S	2528026	2480	0.03383	NA	NA	1273	0.005731	2317	0.02853	NA	NA	2480	0.03383	cellular&nbsp;organisms>Bacteria>PVC&nbsp;group>Planctomycetes>Planctomycetia>Planctomycetales>Planctomycetaceae>Maioricimonas
Chryseobacterium arthrosphaerae	S	651561	4145	0.03381	4145	0.02739	3409	0.01535	2281	0.02808	2261	0.02557	2478	0.03381	cellular&nbsp;organisms>Bacteria>FCB&nbsp;group>Bacteroidetes/Chlorobi&nbsp;group>Bacteroidetes>Flavobacteriia>Flavobacteriales>Weeksellaceae>Chryseobacterium&nbsp;group>Chryseobacterium
Enterococcus gallinarum	S	1353	5117	0.03381	5117	0.03381	NA	NA	NA	NA	NA	NA	NA	NA	cellular&nbsp;organisms>Bacteria>Terrabacteria&nbsp;group>Firmicutes>Bacilli>Lactobacillales>Enterococcaceae>Enterococcus
Streptomyces sp. DSM 40868	S	2721173	2477	0.03379	NA	NA	NA	NA	2066	0.02544	NA	NA	2477	0.03379	cellular&nbsp;organisms>Bacteria>Terrabacteria&nbsp;group>Actinobacteria>Actinomycetia>Streptomycetales>Streptomycetaceae>Streptomyces>unclassified&nbsp;Streptomyces
Desulfitobacterium dichloroeliminans	S	233055	2987	0.03378	NA	NA	NA	NA	NA	NA	2987	0.03378	1459	0.0199	cellular&nbsp;organisms>Bacteria>Terrabacteria&nbsp;group>Firmicutes>Clostridia>Eubacteriales>Peptococcaceae>Desulfitobacterium
Laribacter hongkongensis	S	168471	2475	0.03376	NA	NA	NA	NA	NA	NA	NA	NA	2475	0.03376	cellular&nbsp;organisms>Bacteria>Proteobacteria>Betaproteobacteria>Neisseriales>Chromobacteriaceae>Laribacter
Streptococcus equi	S	1336	2985	0.03376	1783	0.01178	NA	NA	1882	0.02317	2985	0.03376	1693	0.0231	cellular&nbsp;organisms>Bacteria>Terrabacteria&nbsp;group>Firmicutes>Bacilli>Lactobacillales>Streptococcaceae>Streptococcus>Streptococcus&nbsp;dysgalactiae&nbsp;group
Nibribacter ruber	S	2698458	2474	0.03375	NA	NA	NA	NA	2401	0.02956	NA	NA	2474	0.03375	cellular&nbsp;organisms>Bacteria>FCB&nbsp;group>Bacteroidetes/Chlorobi&nbsp;group>Bacteroidetes>Cytophagia>Cytophagales>Hymenobacteraceae>Nibribacter
Fusobacterium mortiferum	S	850	2982	0.03373	1066	0.007043	NA	NA	1251	0.0154	2982	0.03373	1352	0.01844	cellular&nbsp;organisms>Bacteria>Fusobacteria>Fusobacteriia>Fusobacteriales>Fusobacteriaceae>Fusobacterium
Flavisolibacter ginsenosidimutans	S	661481	2737	0.0337	1415	0.009349	NA	NA	2737	0.0337	1159	0.01311	1950	0.0266	cellular&nbsp;organisms>Bacteria>FCB&nbsp;group>Bacteroidetes/Chlorobi&nbsp;group>Bacteroidetes>Chitinophagia>Chitinophagales>Chitinophagaceae>Flavisolibacter
Leptospira interrogans	S	173	5093	0.03365	5093	0.03365	1478	0.006654	1749	0.02153	1957	0.02213	NA	NA	cellular&nbsp;organisms>Bacteria>Spirochaetes>Spirochaetia>Leptospirales>Leptospiraceae>Leptospira
Chromobacterium violaceum	S	536	2596	0.03355	NA	NA	NA	NA	2596	0.03196	NA	NA	2459	0.03355	cellular&nbsp;organisms>Bacteria>Proteobacteria>Betaproteobacteria>Neisseriales>Chromobacteriaceae>Chromobacterium&nbsp;group>Chromobacterium
Liquorilactobacillus mali	S	1618	2964	0.03352	NA	NA	NA	NA	NA	NA	2964	0.03352	NA	NA	cellular&nbsp;organisms>Bacteria>Terrabacteria&nbsp;group>Firmicutes>Bacilli>Lactobacillales>Lactobacillaceae>Liquorilactobacillus
Paraburkholderia caribensis	S	75105	2549	0.03345	NA	NA	NA	NA	2549	0.03138	NA	NA	2452	0.03345	cellular&nbsp;organisms>Bacteria>Proteobacteria>Betaproteobacteria>Burkholderiales>Burkholderiaceae>Paraburkholderia
Methylorubrum populi	S	223967	3187	0.03338	NA	NA	3187	0.01435	2569	0.03163	NA	NA	2447	0.03338	cellular&nbsp;organisms>Bacteria>Proteobacteria>Alphaproteobacteria>Hyphomicrobiales>Methylobacteriaceae>Methylorubrum
Brevibacillus brevis	S	1393	2826	0.03338	2163	0.01429	1805	0.008126	2711	0.03338	2826	0.03196	2372	0.03236	cellular&nbsp;organisms>Bacteria>Terrabacteria&nbsp;group>Firmicutes>Bacilli>Bacillales>Paenibacillaceae>Brevibacillus
Symmachiella dynata	S	2527995	2708	0.03334	1475	0.009746	1755	0.007901	2708	0.03334	NA	NA	2352	0.03209	cellular&nbsp;organisms>Bacteria>PVC&nbsp;group>Planctomycetes>Planctomycetia>Planctomycetales>Planctomycetaceae>Symmachiella
Chryseobacterium piperi	S	558152	5042	0.03331	5042	0.03331	3872	0.01743	1250	0.01539	1315	0.01487	NA	NA	cellular&nbsp;organisms>Bacteria>FCB&nbsp;group>Bacteroidetes/Chlorobi&nbsp;group>Bacteroidetes>Flavobacteriia>Flavobacteriales>Weeksellaceae>Chryseobacterium&nbsp;group>Chryseobacterium
Chryseobacterium lactis	S	1241981	4792	0.03331	4792	0.03166	3825	0.01722	2435	0.02998	2945	0.03331	NA	NA	cellular&nbsp;organisms>Bacteria>FCB&nbsp;group>Bacteroidetes/Chlorobi&nbsp;group>Bacteroidetes>Flavobacteriia>Flavobacteriales>Weeksellaceae>Chryseobacterium&nbsp;group>Epilithonimonas
Methylobacterium indicum	S	1775910	2441	0.0333	NA	NA	NA	NA	2385	0.02937	NA	NA	2441	0.0333	cellular&nbsp;organisms>Bacteria>Proteobacteria>Alphaproteobacteria>Hyphomicrobiales>Methylobacteriaceae>Methylobacterium
Bacillus oleronius	S	38875	2943	0.03328	2872	0.01898	1883	0.008477	1489	0.01833	2943	0.03328	1552	0.02117	cellular&nbsp;organisms>Bacteria>Terrabacteria&nbsp;group>Firmicutes>Bacilli>Bacillales>Bacillaceae>Bacillus
Bradyrhizobium sp. SK17	S	2057741	2439	0.03327	NA	NA	NA	NA	NA	NA	NA	NA	2439	0.03327	cellular&nbsp;organisms>Bacteria>Proteobacteria>Alphaproteobacteria>Hyphomicrobiales>Bradyrhizobiaceae>Bradyrhizobium>unclassified&nbsp;Bradyrhizobium
Companilactobacillus zhachilii	S	2304606	2434	0.03321	2102	0.01389	NA	NA	NA	NA	2072	0.02343	2434	0.03321	cellular&nbsp;organisms>Bacteria>Terrabacteria&nbsp;group>Firmicutes>Bacilli>Lactobacillales>Lactobacillaceae>Companilactobacillus
Dyadobacter sp. Q3-56	S	2747268	2694	0.03317	1434	0.009475	NA	NA	2694	0.03317	2248	0.02542	1631	0.02225	cellular&nbsp;organisms>Bacteria>FCB&nbsp;group>Bacteroidetes/Chlorobi&nbsp;group>Bacteroidetes>Cytophagia>Cytophagales>Cytophagaceae>Dyadobacter>unclassified&nbsp;Dyadobacter
Lactobacillus helveticus	S	1587	2932	0.03316	NA	NA	NA	NA	2353	0.02897	2932	0.03316	1945	0.02653	cellular&nbsp;organisms>Bacteria>Terrabacteria&nbsp;group>Firmicutes>Bacilli>Lactobacillales>Lactobacillaceae>Lactobacillus
Arthrobacter sp. NEB 688	S	904039	2426	0.0331	NA	NA	NA	NA	2041	0.02513	NA	NA	2426	0.0331	cellular&nbsp;organisms>Bacteria>Terrabacteria&nbsp;group>Actinobacteria>Actinomycetia>Micrococcales>Micrococcaceae>Arthrobacter>unclassified&nbsp;Arthrobacter
Mycolicibacterium aurum	S	1791	4061	0.03308	4061	0.02683	2717	0.01223	2216	0.02728	NA	NA	2425	0.03308	cellular&nbsp;organisms>Bacteria>Terrabacteria&nbsp;group>Actinobacteria>Actinomycetia>Corynebacteriales>Mycobacteriaceae>Mycolicibacterium
Anseongella ginsenosidimutans	S	496056	2685	0.03306	1649	0.0109	1457	0.006559	2685	0.03306	NA	NA	2170	0.0296	cellular&nbsp;organisms>Bacteria>FCB&nbsp;group>Bacteroidetes/Chlorobi&nbsp;group>Bacteroidetes>Sphingobacteriia>Sphingobacteriales>Sphingobacteriaceae>Anseongella
Saccharothrix sp. 6-C	S	2781735	2596	0.03304	2177	0.01438	2343	0.01055	2596	0.03196	NA	NA	2422	0.03304	cellular&nbsp;organisms>Bacteria>Terrabacteria&nbsp;group>Actinobacteria>Actinomycetia>Pseudonocardiales>Pseudonocardiaceae>Saccharothrix>unclassified&nbsp;Saccharothrix
Brevilactibacter sp. MC1595	S	2819349	2419	0.033	NA	NA	NA	NA	2199	0.02708	NA	NA	2419	0.033	cellular&nbsp;organisms>Bacteria>Terrabacteria&nbsp;group>Actinobacteria>Actinomycetia>Propionibacteriales>Propionibacteriaceae>Brevilactibacter>unclassified&nbsp;Brevilactibacter
Gillisia sp. Hel1_33_143	S	1336796	4991	0.03298	4991	0.03298	4978	0.02241	NA	NA	NA	NA	NA	NA	cellular&nbsp;organisms>Bacteria>FCB&nbsp;group>Bacteroidetes/Chlorobi&nbsp;group>Bacteroidetes>Flavobacteriia>Flavobacteriales>Flavobacteriaceae>Gillisia>unclassified&nbsp;Gillisia
Saccharothrix syringae	S	103733	2618	0.03296	2423	0.01601	2254	0.01015	2618	0.03223	NA	NA	2416	0.03296	cellular&nbsp;organisms>Bacteria>Terrabacteria&nbsp;group>Actinobacteria>Actinomycetia>Pseudonocardiales>Pseudonocardiaceae>Saccharothrix
Streptomyces sp. CRXT-Y-14	S	2768069	2433	0.03295	NA	NA	2433	0.01095	2363	0.02909	NA	NA	2415	0.03295	cellular&nbsp;organisms>Bacteria>Terrabacteria&nbsp;group>Actinobacteria>Actinomycetia>Streptomycetales>Streptomycetaceae>Streptomyces>unclassified&nbsp;Streptomyces
Caldicellulosiruptor saccharolyticus	S	44001	2907	0.03288	NA	NA	NA	NA	NA	NA	2907	0.03288	NA	NA	cellular&nbsp;organisms>Bacteria>Terrabacteria&nbsp;group>Firmicutes>Clostridia>Thermoanaerobacterales>Thermoanaerobacterales&nbsp;Family&nbsp;III.&nbsp;Incertae&nbsp;Sedis>Caldicellulosiruptor
Paraburkholderia aromaticivorans	S	2026199	2668	0.03285	NA	NA	2614	0.01177	2668	0.03285	NA	NA	2398	0.03271	cellular&nbsp;organisms>Bacteria>Proteobacteria>Betaproteobacteria>Burkholderiales>Burkholderiaceae>Paraburkholderia
Flavobacterium sp. HYN0086	S	2249356	7139	0.03284	4971	0.03284	7139	0.03214	NA	NA	1778	0.02011	NA	NA	cellular&nbsp;organisms>Bacteria>FCB&nbsp;group>Bacteroidetes/Chlorobi&nbsp;group>Bacteroidetes>Flavobacteriia>Flavobacteriales>Flavobacteriaceae>Flavobacterium>unclassified&nbsp;Flavobacterium
Bacillus sp. Y1	S	352858	2902	0.03282	2446	0.01616	1612	0.007257	1421	0.0175	2902	0.03282	1236	0.01686	cellular&nbsp;organisms>Bacteria>Terrabacteria&nbsp;group>Firmicutes>Bacilli>Bacillales>Bacillaceae>Bacillus>unclassified&nbsp;Bacillus&nbsp;(in:&nbsp;Bacteria)
Bacillus sp. 1NLA3E	S	666686	2902	0.03282	2385	0.01576	1907	0.008585	1333	0.01641	2902	0.03282	1416	0.01932	cellular&nbsp;organisms>Bacteria>Terrabacteria&nbsp;group>Firmicutes>Bacilli>Bacillales>Bacillaceae>Bacillus>unclassified&nbsp;Bacillus&nbsp;(in:&nbsp;Bacteria)
Dialister massiliensis	S	2161821	2431	0.03277	1472	0.009726	1187	0.005344	1971	0.02427	2431	0.02749	2402	0.03277	cellular&nbsp;organisms>Bacteria>Terrabacteria&nbsp;group>Firmicutes>Negativicutes>Veillonellales>Veillonellaceae>Dialister
Baekduia soli	S	496014	2400	0.03274	NA	NA	1414	0.006366	2221	0.02735	NA	NA	2400	0.03274	cellular&nbsp;organisms>Bacteria>Terrabacteria&nbsp;group>Actinobacteria>Rubrobacteria>Rubrobacterales>Baekduiaceae>Baekduia
Latilactobacillus sakei	S	1599	2892	0.03271	1848	0.01221	1355	0.0061	2089	0.02572	2892	0.03271	1595	0.02176	cellular&nbsp;organisms>Bacteria>Terrabacteria&nbsp;group>Firmicutes>Bacilli>Lactobacillales>Lactobacillaceae>Latilactobacillus
Amycolatopsis sp. Hca4	S	2742131	2397	0.0327	NA	NA	1894	0.008527	2233	0.02749	NA	NA	2397	0.0327	cellular&nbsp;organisms>Bacteria>Terrabacteria&nbsp;group>Actinobacteria>Actinomycetia>Pseudonocardiales>Pseudonocardiaceae>Amycolatopsis>unclassified&nbsp;Amycolatopsis
Catenulispora acidiphila	S	304895	2439	0.03262	1929	0.01275	2012	0.009058	2439	0.03003	NA	NA	2391	0.03262	cellular&nbsp;organisms>Bacteria>Terrabacteria&nbsp;group>Actinobacteria>Actinomycetia>Catenulisporales>Catenulisporaceae>Catenulispora
Sinorhizobium meliloti	S	382	2642	0.03253	2161	0.01428	2043	0.009198	2642	0.03253	NA	NA	2191	0.02989	cellular&nbsp;organisms>Bacteria>Proteobacteria>Alphaproteobacteria>Hyphomicrobiales>Rhizobiaceae>Sinorhizobium/Ensifer&nbsp;group>Sinorhizobium
Heliobacterium modesticaldum	S	35701	2382	0.0325	NA	NA	NA	NA	2295	0.02826	NA	NA	2382	0.0325	cellular&nbsp;organisms>Bacteria>Terrabacteria&nbsp;group>Firmicutes>Clostridia>Eubacteriales>Heliobacteriaceae>Heliobacterium
Desulfosarcina ovata	S	83564	2381	0.03248	1300	0.008589	1566	0.00705	2194	0.02701	NA	NA	2381	0.03248	cellular&nbsp;organisms>Bacteria>Proteobacteria>delta/epsilon&nbsp;subdivisions>Deltaproteobacteria>Desulfobacterales>Desulfobacteraceae>Desulfosarcina
Thiomonas intermedia	S	926	2379	0.03245	NA	NA	NA	NA	2304	0.02837	NA	NA	2379	0.03245	cellular&nbsp;organisms>Bacteria>Proteobacteria>Betaproteobacteria>Burkholderiales>Burkholderiales&nbsp;genera&nbsp;incertae&nbsp;sedis>Thiomonas
Brevibacterium linens	S	1703	2632	0.03241	NA	NA	NA	NA	2632	0.03241	NA	NA	NA	NA	cellular&nbsp;organisms>Bacteria>Terrabacteria&nbsp;group>Actinobacteria>Actinomycetia>Micrococcales>Brevibacteriaceae>Brevibacterium
Cohnella sp. LGH	S	1619153	2632	0.03241	1200	0.007929	1490	0.006708	2632	0.03241	1279	0.01446	2287	0.0312	cellular&nbsp;organisms>Bacteria>Terrabacteria&nbsp;group>Firmicutes>Bacilli>Bacillales>Paenibacillaceae>Cohnella>unclassified&nbsp;Cohnella
Staphylococcus pasteuri	S	45972	3029	0.0324	3029	0.02001	NA	NA	NA	NA	2865	0.0324	NA	NA	cellular&nbsp;organisms>Bacteria>Terrabacteria&nbsp;group>Firmicutes>Bacilli>Bacillales>Staphylococcaceae>Staphylococcus
Pseudocnuella soli	S	2502779	2626	0.03233	1600	0.01057	1103	0.004966	2626	0.03233	2029	0.02295	1891	0.0258	cellular&nbsp;organisms>Bacteria>FCB&nbsp;group>Bacteroidetes/Chlorobi&nbsp;group>Bacteroidetes>Chitinophagia>Chitinophagales>Chitinophagaceae>Pseudocnuella
Spirochaeta thermophila	S	154	2624	0.03231	1248	0.008246	1437	0.006469	2624	0.03231	NA	NA	2145	0.02926	cellular&nbsp;organisms>Bacteria>Spirochaetes>Spirochaetia>Spirochaetales>Spirochaetaceae>Spirochaeta
Aquimarina sp. BL5	S	1714860	4884	0.03227	4884	0.03227	4176	0.0188	1310	0.01613	1360	0.01538	NA	NA	cellular&nbsp;organisms>Bacteria>FCB&nbsp;group>Bacteroidetes/Chlorobi&nbsp;group>Bacteroidetes>Flavobacteriia>Flavobacteriales>Flavobacteriaceae>Aquimarina>unclassified&nbsp;Aquimarina
Croceicoccus marinus	S	450378	2363	0.03224	NA	NA	NA	NA	NA	NA	NA	NA	2363	0.03224	cellular&nbsp;organisms>Bacteria>Proteobacteria>Alphaproteobacteria>Sphingomonadales>Erythrobacteraceae>Croceicoccus
Caldicellulosiruptor sp. YA01	S	2806205	2851	0.03224	NA	NA	NA	NA	NA	NA	2851	0.03224	NA	NA	cellular&nbsp;organisms>Bacteria>Terrabacteria&nbsp;group>Firmicutes>Clostridia>Thermoanaerobacterales>Thermoanaerobacterales&nbsp;Family&nbsp;III.&nbsp;Incertae&nbsp;Sedis>Caldicellulosiruptor>unclassified&nbsp;Caldicellulosiruptor
Capnocytophaga stomatis	S	1848904	2616	0.03221	2165	0.0143	2180	0.009814	2616	0.03221	1364	0.01543	1612	0.02199	cellular&nbsp;organisms>Bacteria>FCB&nbsp;group>Bacteroidetes/Chlorobi&nbsp;group>Bacteroidetes>Flavobacteriia>Flavobacteriales>Flavobacteriaceae>Capnocytophaga
Borreliella bavariensis	S	664662	2848	0.03221	NA	NA	NA	NA	NA	NA	2848	0.03221	NA	NA	cellular&nbsp;organisms>Bacteria>Spirochaetes>Spirochaetia>Spirochaetales>Borreliaceae>Borreliella
Streptomyces rimosus	S	1927	3117	0.03221	NA	NA	3117	0.01403	2616	0.03221	NA	NA	1848	0.02521	cellular&nbsp;organisms>Bacteria>Terrabacteria&nbsp;group>Actinobacteria>Actinomycetia>Streptomycetales>Streptomycetaceae>Streptomyces
Erysipelothrix inopinata	S	225084	2845	0.03218	1551	0.01025	1500	0.006753	2345	0.02887	2845	0.03218	2180	0.02974	cellular&nbsp;organisms>Bacteria>Terrabacteria&nbsp;group>Firmicutes>Erysipelotrichia>Erysipelotrichales>Erysipelotrichaceae>Erysipelothrix
Metabacillus litoralis	S	152268	2842	0.03214	2269	0.01499	1503	0.006766	1605	0.01976	2842	0.03214	1533	0.02091	cellular&nbsp;organisms>Bacteria>Terrabacteria&nbsp;group>Firmicutes>Bacilli>Bacillales>Bacillaceae>Metabacillus
Nocardia terpenica	S	455432	2606	0.03209	2029	0.01341	2095	0.009432	2606	0.03209	NA	NA	2305	0.03145	cellular&nbsp;organisms>Bacteria>Terrabacteria&nbsp;group>Actinobacteria>Actinomycetia>Corynebacteriales>Nocardiaceae>Nocardia
Anaerobacillus isosaccharinicus	S	1532552	2837	0.03209	2080	0.01374	1245	0.005605	1382	0.01702	2837	0.03209	1460	0.01992	cellular&nbsp;organisms>Bacteria>Terrabacteria&nbsp;group>Firmicutes>Bacilli>Bacillales>Bacillaceae>Anaerobacillus
Mesorhizobium sp. N3	S	675281	2350	0.03206	NA	NA	1845	0.008306	1763	0.02171	NA	NA	2350	0.03206	cellular&nbsp;organisms>Bacteria>Proteobacteria>Alphaproteobacteria>Hyphomicrobiales>Phyllobacteriaceae>Mesorhizobium>unclassified&nbsp;Mesorhizobium
Mucilaginibacter ginsenosidivorans	S	398053	2349	0.03205	1093	0.007222	NA	NA	2105	0.02592	1126	0.01273	2349	0.03205	cellular&nbsp;organisms>Bacteria>FCB&nbsp;group>Bacteroidetes/Chlorobi&nbsp;group>Bacteroidetes>Sphingobacteriia>Sphingobacteriales>Sphingobacteriaceae>Mucilaginibacter
Staphylococcus equorum	S	246432	2834	0.03205	NA	NA	NA	NA	NA	NA	2834	0.03205	NA	NA	cellular&nbsp;organisms>Bacteria>Terrabacteria&nbsp;group>Firmicutes>Bacilli>Bacillales>Staphylococcaceae>Staphylococcus
Chryseobacterium gallinarum	S	1324352	4849	0.03204	4849	0.03204	3884	0.01749	1917	0.0236	1248	0.01411	2195	0.02994	cellular&nbsp;organisms>Bacteria>FCB&nbsp;group>Bacteroidetes/Chlorobi&nbsp;group>Bacteroidetes>Flavobacteriia>Flavobacteriales>Weeksellaceae>Chryseobacterium&nbsp;group>Chryseobacterium
Streptomyces bingchenggensis	S	379067	2601	0.03203	2101	0.01388	1941	0.008738	2601	0.03203	NA	NA	2088	0.02849	cellular&nbsp;organisms>Bacteria>Terrabacteria&nbsp;group>Actinobacteria>Actinomycetia>Streptomycetales>Streptomycetaceae>Streptomyces
Chryseobacterium haifense	S	421525	4844	0.03201	4844	0.03201	4522	0.02036	NA	NA	NA	NA	NA	NA	cellular&nbsp;organisms>Bacteria>FCB&nbsp;group>Bacteroidetes/Chlorobi&nbsp;group>Bacteroidetes>Flavobacteriia>Flavobacteriales>Weeksellaceae>Chryseobacterium&nbsp;group>Kaistella
Hymenobacter sp. PAMC 26628	S	1484118	2344	0.03198	1507	0.009957	NA	NA	1919	0.02363	NA	NA	2344	0.03198	cellular&nbsp;organisms>Bacteria>FCB&nbsp;group>Bacteroidetes/Chlorobi&nbsp;group>Bacteroidetes>Cytophagia>Cytophagales>Hymenobacteraceae>Hymenobacter>unclassified&nbsp;Hymenobacter
Singulisphaera acidiphila	S	466153	2596	0.03196	1331	0.008794	2158	0.009715	2596	0.03196	NA	NA	2121	0.02894	cellular&nbsp;organisms>Bacteria>PVC&nbsp;group>Planctomycetes>Planctomycetia>Isosphaerales>Isosphaeraceae>Singulisphaera
Streptomyces sp. TLI_053	S	1855352	2555	0.03196	NA	NA	2555	0.0115	2431	0.02993	NA	NA	2343	0.03196	cellular&nbsp;organisms>Bacteria>Terrabacteria&nbsp;group>Actinobacteria>Actinomycetia>Streptomycetales>Streptomycetaceae>Streptomyces>unclassified&nbsp;Streptomyces
Brachyspira murdochii	S	84378	2824	0.03194	NA	NA	NA	NA	1812	0.02231	2824	0.03194	1859	0.02536	cellular&nbsp;organisms>Bacteria>Spirochaetes>Spirochaetia>Brachyspirales>Brachyspiraceae>Brachyspira
Spirosoma sp. CJU-R4	S	2728024	2590	0.03189	1429	0.009442	NA	NA	2590	0.03189	NA	NA	1757	0.02397	cellular&nbsp;organisms>Bacteria>FCB&nbsp;group>Bacteroidetes/Chlorobi&nbsp;group>Bacteroidetes>Cytophagia>Cytophagales>Cytophagaceae>Spirosoma>unclassified&nbsp;Spirosoma
Fusobacterium hwasookii	S	1583098	2820	0.03189	NA	NA	NA	NA	2449	0.03015	2820	0.03189	2303	0.03142	cellular&nbsp;organisms>Bacteria>Fusobacteria>Fusobacteriia>Fusobacteriales>Fusobacteriaceae>Fusobacterium
Sphaerochaeta pleomorpha	S	1131707	2587	0.03185	1852	0.01224	1656	0.007455	2587	0.03185	1820	0.02058	2319	0.03164	cellular&nbsp;organisms>Bacteria>Spirochaetes>Spirochaetia>Spirochaetales>Spirochaetaceae>Sphaerochaeta
Gemmata obscuriglobus	S	114	2470	0.03184	1862	0.0123	2017	0.009081	2470	0.03041	NA	NA	2334	0.03184	cellular&nbsp;organisms>Bacteria>PVC&nbsp;group>Planctomycetes>Planctomycetia>Gemmatales>Gemmataceae>Gemmata
Chryseobacterium sp.	S	1871047	2582	0.03179	1946	0.01286	1480	0.006663	2582	0.03179	1457	0.01648	2115	0.02885	cellular&nbsp;organisms>Bacteria>FCB&nbsp;group>Bacteroidetes/Chlorobi&nbsp;group>Bacteroidetes>Flavobacteriia>Flavobacteriales>Weeksellaceae>Chryseobacterium&nbsp;group>Chryseobacterium>unclassified&nbsp;Chryseobacterium
Pantoea ananatis	S	553	2581	0.03178	NA	NA	1254	0.005645	2581	0.03178	NA	NA	NA	NA	cellular&nbsp;organisms>Bacteria>Proteobacteria>Gammaproteobacteria>Enterobacterales>Erwiniaceae>Pantoea
Streptomyces sp. PBH53	S	1577075	2581	0.03178	NA	NA	NA	NA	2581	0.03178	NA	NA	NA	NA	cellular&nbsp;organisms>Bacteria>Terrabacteria&nbsp;group>Actinobacteria>Actinomycetia>Streptomycetales>Streptomycetaceae>Streptomyces>unclassified&nbsp;Streptomyces
Flavobacterium sp. BB8	S	2816357	5995	0.03172	4801	0.03172	5995	0.02699	1825	0.02247	1615	0.01826	1794	0.02447	cellular&nbsp;organisms>Bacteria>FCB&nbsp;group>Bacteroidetes/Chlorobi&nbsp;group>Bacteroidetes>Flavobacteriia>Flavobacteriales>Flavobacteriaceae>Flavobacterium>unclassified&nbsp;Flavobacterium
Staphylococcus hominis	S	1290	2803	0.0317	1871	0.01236	NA	NA	1825	0.02247	2803	0.0317	1911	0.02607	cellular&nbsp;organisms>Bacteria>Terrabacteria&nbsp;group>Firmicutes>Bacilli>Bacillales>Staphylococcaceae>Staphylococcus
Dokdonia sp. 4H-3-7-5	S	983548	2799	0.03166	NA	NA	NA	NA	NA	NA	2799	0.03166	NA	NA	cellular&nbsp;organisms>Bacteria>FCB&nbsp;group>Bacteroidetes/Chlorobi&nbsp;group>Bacteroidetes>Flavobacteriia>Flavobacteriales>Flavobacteriaceae>Dokdonia>unclassified&nbsp;Dokdonia
Flavobacterium sp. SLB02	S	2665645	4789	0.03164	4789	0.03164	4436	0.01997	1319	0.01624	1595	0.01804	NA	NA	cellular&nbsp;organisms>Bacteria>FCB&nbsp;group>Bacteroidetes/Chlorobi&nbsp;group>Bacteroidetes>Flavobacteriia>Flavobacteriales>Flavobacteriaceae>Flavobacterium>unclassified&nbsp;Flavobacterium
Francisella philomiragia	S	28110	2798	0.03164	NA	NA	NA	NA	NA	NA	2798	0.03164	NA	NA	cellular&nbsp;organisms>Bacteria>Proteobacteria>Gammaproteobacteria>Thiotrichales>Francisellaceae>Francisella
Stigmatella aurantiaca	S	41	2318	0.03162	NA	NA	1393	0.006271	2247	0.02767	NA	NA	2318	0.03162	cellular&nbsp;organisms>Bacteria>Proteobacteria>delta/epsilon&nbsp;subdivisions>Deltaproteobacteria>Myxococcales>Cystobacterineae>Archangiaceae>Stigmatella
Actinomadura sp. NAK00032	S	2742128	2525	0.03158	NA	NA	2298	0.01035	2525	0.03109	NA	NA	2315	0.03158	cellular&nbsp;organisms>Bacteria>Terrabacteria&nbsp;group>Actinobacteria>Actinomycetia>Streptosporangiales>Thermomonosporaceae>Actinomadura>unclassified&nbsp;Actinomadura
Rhodocytophaga rosea	S	2704465	2563	0.03156	1813	0.01198	1447	0.006514	2563	0.03156	1923	0.02175	1855	0.02531	cellular&nbsp;organisms>Bacteria>FCB&nbsp;group>Bacteroidetes/Chlorobi&nbsp;group>Bacteroidetes>Cytophagia>Cytophagales>Cytophagaceae>Rhodocytophaga
Sebaldella termitidis	S	826	2790	0.03155	1151	0.007605	1083	0.004876	1673	0.0206	2790	0.03155	1353	0.01846	cellular&nbsp;organisms>Bacteria>Fusobacteria>Fusobacteriia>Fusobacteriales>Leptotrichiaceae>Sebaldella
Polaribacter vadi	S	1774273	4953	0.03152	4770	0.03152	4953	0.0223	1480	0.01822	2104	0.0238	1406	0.01918	cellular&nbsp;organisms>Bacteria>FCB&nbsp;group>Bacteroidetes/Chlorobi&nbsp;group>Bacteroidetes>Flavobacteriia>Flavobacteriales>Flavobacteriaceae>Polaribacter
Flavobacterium sediminis	S	2201181	5382	0.0315	4609	0.03045	5382	0.02423	2558	0.0315	2737	0.03095	NA	NA	cellular&nbsp;organisms>Bacteria>FCB&nbsp;group>Bacteroidetes/Chlorobi&nbsp;group>Bacteroidetes>Flavobacteriia>Flavobacteriales>Flavobacteriaceae>Flavobacterium
Ramlibacter tataouinensis	S	94132	2556	0.03147	1501	0.009917	1836	0.008266	2556	0.03147	NA	NA	2196	0.02996	cellular&nbsp;organisms>Bacteria>Proteobacteria>Betaproteobacteria>Burkholderiales>Comamonadaceae>Ramlibacter
Burkholderia lata	S	482957	2447	0.03145	NA	NA	1655	0.007451	2447	0.03013	NA	NA	2305	0.03145	cellular&nbsp;organisms>Bacteria>Proteobacteria>Betaproteobacteria>Burkholderiales>Burkholderiaceae>Burkholderia>Burkholderia&nbsp;cepacia&nbsp;complex
Lacticaseibacillus rhamnosus	S	47715	2773	0.03136	NA	NA	NA	NA	NA	NA	2773	0.03136	2080	0.02838	cellular&nbsp;organisms>Bacteria>Terrabacteria&nbsp;group>Firmicutes>Bacilli>Lactobacillales>Lactobacillaceae>Lacticaseibacillus
Tenacibaculum maritimum	S	107401	5046	0.03134	4743	0.03134	5046	0.02272	NA	NA	1806	0.02043	NA	NA	cellular&nbsp;organisms>Bacteria>FCB&nbsp;group>Bacteroidetes/Chlorobi&nbsp;group>Bacteroidetes>Flavobacteriia>Flavobacteriales>Flavobacteriaceae>Tenacibaculum
Corallococcus macrosporus	S	35	2335	0.03132	NA	NA	1882	0.008473	2335	0.02875	NA	NA	2296	0.03132	cellular&nbsp;organisms>Bacteria>Proteobacteria>delta/epsilon&nbsp;subdivisions>Deltaproteobacteria>Myxococcales>Cystobacterineae>Myxococcaceae>Corallococcus
Kitasatospora sp. MMS16-BH015	S	2018025	2331	0.03131	NA	NA	2186	0.009841	2331	0.0287	NA	NA	2295	0.03131	cellular&nbsp;organisms>Bacteria>Terrabacteria&nbsp;group>Actinobacteria>Actinomycetia>Streptomycetales>Streptomycetaceae>Kitasatospora>unclassified&nbsp;Kitasatospora
Rhizobium sp. BG4	S	2613770	2542	0.0313	NA	NA	NA	NA	2542	0.0313	NA	NA	NA	NA	cellular&nbsp;organisms>Bacteria>Proteobacteria>Alphaproteobacteria>Hyphomicrobiales>Rhizobiaceae>Rhizobium/Agrobacterium&nbsp;group>Rhizobium>unclassified&nbsp;Rhizobium
Runella sp. HYN0085	S	2259595	2764	0.03126	1434	0.009475	1656	0.007455	1868	0.023	2764	0.03126	1642	0.0224	cellular&nbsp;organisms>Bacteria>FCB&nbsp;group>Bacteroidetes/Chlorobi&nbsp;group>Bacteroidetes>Cytophagia>Cytophagales>Cytophagaceae>Runella>unclassified&nbsp;Runella
Polynucleobacter necessarius	S	576610	2336	0.03123	1735	0.01146	1786	0.008041	2277	0.02804	2336	0.02642	2289	0.03123	cellular&nbsp;organisms>Bacteria>Proteobacteria>Betaproteobacteria>Burkholderiales>Burkholderiaceae>Polynucleobacter
Streptomyces sp. CRXT-G-22	S	2768066	2534	0.0312	NA	NA	2483	0.01118	2534	0.0312	NA	NA	2283	0.03115	cellular&nbsp;organisms>Bacteria>Terrabacteria&nbsp;group>Actinobacteria>Actinomycetia>Streptomycetales>Streptomycetaceae>Streptomyces>unclassified&nbsp;Streptomyces
Carnobacterium divergens	S	2748	3203	0.0312	3203	0.02116	1456	0.006555	1567	0.01929	2759	0.0312	1762	0.02404	cellular&nbsp;organisms>Bacteria>Terrabacteria&nbsp;group>Firmicutes>Bacilli>Lactobacillales>Carnobacteriaceae>Carnobacterium
Rhodococcus ruber	S	1830	2343	0.03119	NA	NA	NA	NA	2343	0.02885	NA	NA	2286	0.03119	cellular&nbsp;organisms>Bacteria>Terrabacteria&nbsp;group>Actinobacteria>Actinomycetia>Corynebacteriales>Nocardiaceae>Rhodococcus
Weizmannia coagulans	S	1398	2533	0.03119	2307	0.01524	1988	0.00895	2533	0.03119	1939	0.02193	2217	0.03024	cellular&nbsp;organisms>Bacteria>Terrabacteria&nbsp;group>Firmicutes>Bacilli>Bacillales>Bacillaceae>Weizmannia
Haemophilus influenzae	S	727	3190	0.03116	2507	0.01656	3190	0.01436	2405	0.02961	2403	0.02718	2284	0.03116	cellular&nbsp;organisms>Bacteria>Proteobacteria>Gammaproteobacteria>Pasteurellales>Pasteurellaceae>Haemophilus
Jiangella sp. DSM 45060	S	1798224	2528	0.03113	1945	0.01285	1827	0.008225	2528	0.03113	NA	NA	2180	0.02974	cellular&nbsp;organisms>Bacteria>Terrabacteria&nbsp;group>Actinobacteria>Actinomycetia>Jiangellales>Jiangellaceae>Jiangella>unclassified&nbsp;Jiangella
Paraburkholderia phytofirmans	S	261302	2522	0.03108	NA	NA	2522	0.01135	2515	0.03097	NA	NA	2278	0.03108	cellular&nbsp;organisms>Bacteria>Proteobacteria>Betaproteobacteria>Burkholderiales>Burkholderiaceae>Paraburkholderia
Rufibacter sp. DG15C	S	1379909	2522	0.03105	NA	NA	NA	NA	2522	0.03105	NA	NA	1864	0.02543	cellular&nbsp;organisms>Bacteria>FCB&nbsp;group>Bacteroidetes/Chlorobi&nbsp;group>Bacteroidetes>Cytophagia>Cytophagales>Hymenobacteraceae>Rufibacter>unclassified&nbsp;Rufibacter
Streptococcus canis	S	1329	2744	0.03103	1490	0.009845	NA	NA	1898	0.02337	2744	0.03103	1734	0.02366	cellular&nbsp;organisms>Bacteria>Terrabacteria&nbsp;group>Firmicutes>Bacilli>Lactobacillales>Streptococcaceae>Streptococcus
Polynucleobacter duraquae	S	1835254	2741	0.031	NA	NA	NA	NA	NA	NA	2741	0.031	NA	NA	cellular&nbsp;organisms>Bacteria>Proteobacteria>Betaproteobacteria>Burkholderiales>Burkholderiaceae>Polynucleobacter
Enterococcus durans	S	53345	2740	0.03099	2188	0.01446	NA	NA	1604	0.01975	2740	0.03099	1682	0.02295	cellular&nbsp;organisms>Bacteria>Terrabacteria&nbsp;group>Firmicutes>Bacilli>Lactobacillales>Enterococcaceae>Enterococcus
Streptococcus parauberis	S	1348	2737	0.03095	1550	0.01024	NA	NA	NA	NA	2737	0.03095	NA	NA	cellular&nbsp;organisms>Bacteria>Terrabacteria&nbsp;group>Firmicutes>Bacilli>Lactobacillales>Streptococcaceae>Streptococcus
Leifsonia sp. PS1209	S	2724914	2399	0.03094	NA	NA	NA	NA	2399	0.02954	NA	NA	2268	0.03094	cellular&nbsp;organisms>Bacteria>Terrabacteria&nbsp;group>Actinobacteria>Actinomycetia>Micrococcales>Microbacteriaceae>Leifsonia>unclassified&nbsp;Leifsonia
Actinoplanes teichomyceticus	S	1867	2354	0.03094	NA	NA	2217	0.009981	2354	0.02898	NA	NA	2268	0.03094	cellular&nbsp;organisms>Bacteria>Terrabacteria&nbsp;group>Actinobacteria>Actinomycetia>Micromonosporales>Micromonosporaceae>Actinoplanes
Pandoraea pnomenusa	S	93220	2512	0.03093	NA	NA	NA	NA	2512	0.03093	NA	NA	2197	0.02997	cellular&nbsp;organisms>Bacteria>Proteobacteria>Betaproteobacteria>Burkholderiales>Burkholderiaceae>Pandoraea
Paenisporosarcina antarctica	S	417367	4676	0.0309	4676	0.0309	3125	0.01407	1350	0.01662	2264	0.0256	NA	NA	cellular&nbsp;organisms>Bacteria>Terrabacteria&nbsp;group>Firmicutes>Bacilli>Bacillales>Planococcaceae>Paenisporosarcina
Desulfosporosinus meridiei	S	79209	2728	0.03085	NA	NA	NA	NA	NA	NA	2728	0.03085	1193	0.01628	cellular&nbsp;organisms>Bacteria>Terrabacteria&nbsp;group>Firmicutes>Clostridia>Eubacteriales>Peptococcaceae>Desulfosporosinus
Schnuerera ultunensis	S	45497	2728	0.03085	NA	NA	1143	0.005146	1677	0.02065	2728	0.03085	1587	0.02165	cellular&nbsp;organisms>Bacteria>Terrabacteria&nbsp;group>Firmicutes>Tissierellia>Tissierellales>Tissierellaceae>Schnuerera
Kordia antarctica	S	1218801	4666	0.03083	4666	0.03083	4276	0.01925	1984	0.02443	2032	0.02298	1164	0.01588	cellular&nbsp;organisms>Bacteria>FCB&nbsp;group>Bacteroidetes/Chlorobi&nbsp;group>Bacteroidetes>Flavobacteriia>Flavobacteriales>Flavobacteriaceae>Kordia
Nonlabens spongiae	S	331648	2502	0.03081	2317	0.01531	2289	0.01031	2502	0.03081	1916	0.02167	NA	NA	cellular&nbsp;organisms>Bacteria>FCB&nbsp;group>Bacteroidetes/Chlorobi&nbsp;group>Bacteroidetes>Flavobacteriia>Flavobacteriales>Flavobacteriaceae>Nonlabens
Erysipelothrix sp. HDW6C	S	2714930	2689	0.03072	1237	0.008173	NA	NA	2495	0.03072	2689	0.03041	2145	0.02926	cellular&nbsp;organisms>Bacteria>Terrabacteria&nbsp;group>Firmicutes>Erysipelotrichia>Erysipelotrichales>Erysipelotrichaceae>Erysipelothrix>unclassified&nbsp;Erysipelothrix
Pediococcus pentosaceus	S	1255	2713	0.03068	2012	0.01329	NA	NA	NA	NA	2713	0.03068	1653	0.02255	cellular&nbsp;organisms>Bacteria>Terrabacteria&nbsp;group>Firmicutes>Bacilli>Lactobacillales>Lactobacillaceae>Pediococcus
Nostoc sp. TCL26-01	S	2576904	2487	0.03062	NA	NA	NA	NA	2487	0.03062	NA	NA	NA	NA	cellular&nbsp;organisms>Bacteria>Terrabacteria&nbsp;group>Cyanobacteria/Melainabacteria&nbsp;group>Cyanobacteria>Nostocales>Nostocaceae>Nostoc>unclassified&nbsp;Nostoc
Algoriphagus sp. Y33	S	2772483	2499	0.03058	1970	0.01302	1445	0.006505	2484	0.03058	2499	0.02826	1384	0.01888	cellular&nbsp;organisms>Bacteria>FCB&nbsp;group>Bacteroidetes/Chlorobi&nbsp;group>Bacteroidetes>Cytophagia>Cytophagales>Cyclobacteriaceae>Algoriphagus>unclassified&nbsp;Algoriphagus
Leptotrichia sp. oral taxon 212	S	712357	2703	0.03057	NA	NA	NA	NA	2181	0.02685	2703	0.03057	2127	0.02902	cellular&nbsp;organisms>Bacteria>Fusobacteria>Fusobacteriia>Fusobacteriales>Leptotrichiaceae>Leptotrichia>unclassified&nbsp;Leptotrichia
Candidatus Cyclonatronum proteinivorum	S	1457365	2481	0.03055	1232	0.00814	NA	NA	2481	0.03055	NA	NA	1677	0.02288	cellular&nbsp;organisms>Bacteria>FCB&nbsp;group>Bacteroidetes/Chlorobi&nbsp;group>Balneolaeota>unclassified&nbsp;Balneolaeota>Candidatus&nbsp;Cyclonatronum
Lacibacter sp. S13-6-6	S	2760713	2479	0.03052	2127	0.01405	1677	0.00755	2479	0.03052	2038	0.02305	1785	0.02435	cellular&nbsp;organisms>Bacteria>FCB&nbsp;group>Bacteroidetes/Chlorobi&nbsp;group>Bacteroidetes>Chitinophagia>Chitinophagales>Chitinophagaceae>Lacibacter>unclassified&nbsp;Lacibacter
Leptotrichia trevisanii	S	109328	2696	0.03049	NA	NA	NA	NA	NA	NA	2696	0.03049	NA	NA	cellular&nbsp;organisms>Bacteria>Fusobacteria>Fusobacteriia>Fusobacteriales>Leptotrichiaceae>Leptotrichia
Cellulophaga sp. L1A9	S	2686362	4617	0.03047	4611	0.03047	4617	0.02079	NA	NA	1801	0.02037	NA	NA	cellular&nbsp;organisms>Bacteria>FCB&nbsp;group>Bacteroidetes/Chlorobi&nbsp;group>Bacteroidetes>Flavobacteriia>Flavobacteriales>Flavobacteriaceae>Cellulophaga>unclassified&nbsp;Cellulophaga
Carnobacterium maltaromaticum	S	2751	4388	0.03047	4388	0.02899	3484	0.01568	1812	0.02231	2694	0.03047	1826	0.02491	cellular&nbsp;organisms>Bacteria>Terrabacteria&nbsp;group>Firmicutes>Bacilli>Lactobacillales>Carnobacteriaceae>Carnobacterium
Capnocytophaga endodontalis	S	2708117	2472	0.03044	NA	NA	NA	NA	2472	0.03044	NA	NA	NA	NA	cellular&nbsp;organisms>Bacteria>FCB&nbsp;group>Bacteroidetes/Chlorobi&nbsp;group>Bacteroidetes>Flavobacteriia>Flavobacteriales>Flavobacteriaceae>Capnocytophaga
Paraflavitalea soli	S	2315862	2469	0.0304	1881	0.01243	1055	0.00475	2469	0.0304	1814	0.02052	1849	0.02522	cellular&nbsp;organisms>Bacteria>FCB&nbsp;group>Bacteroidetes/Chlorobi&nbsp;group>Bacteroidetes>Chitinophagia>Chitinophagales>Chitinophagaceae>Paraflavitalea
Chryseobacterium manosquense	S	2754694	4601	0.0304	4601	0.0304	NA	NA	NA	NA	NA	NA	NA	NA	cellular&nbsp;organisms>Bacteria>FCB&nbsp;group>Bacteroidetes/Chlorobi&nbsp;group>Bacteroidetes>Flavobacteriia>Flavobacteriales>Weeksellaceae>Chryseobacterium&nbsp;group>Chryseobacterium
Cupriavidus pinatubonensis	S	248026	2228	0.03039	NA	NA	NA	NA	1970	0.02426	NA	NA	2228	0.03039	cellular&nbsp;organisms>Bacteria>Proteobacteria>Betaproteobacteria>Burkholderiales>Burkholderiaceae>Cupriavidus
Saccharibacillus brassicae	S	2583377	2228	0.03039	NA	NA	1322	0.005952	2133	0.02626	NA	NA	2228	0.03039	cellular&nbsp;organisms>Bacteria>Terrabacteria&nbsp;group>Firmicutes>Bacilli>Bacillales>Paenibacillaceae>Saccharibacillus
Treponema sp. Marseille-Q4132	S	2766701	2227	0.03038	2217	0.01465	NA	NA	1558	0.01918	1769	0.02001	2227	0.03038	cellular&nbsp;organisms>Bacteria>Spirochaetes>Spirochaetia>Spirochaetales>Spirochaetaceae>Treponema>unclassified&nbsp;Treponema
Serratia proteamaculans	S	28151	6746	0.03037	NA	NA	6746	0.03037	1234	0.01519	NA	NA	NA	NA	cellular&nbsp;organisms>Bacteria>Proteobacteria>Gammaproteobacteria>Enterobacterales>Yersiniaceae>Serratia
Micromonospora echinofusca	S	47858	2226	0.03037	NA	NA	NA	NA	2004	0.02467	NA	NA	2226	0.03037	cellular&nbsp;organisms>Bacteria>Terrabacteria&nbsp;group>Actinobacteria>Actinomycetia>Micromonosporales>Micromonosporaceae>Micromonospora
Planococcus halocryophilus	S	1215089	4596	0.03037	4596	0.03037	2262	0.01018	NA	NA	1933	0.02186	NA	NA	cellular&nbsp;organisms>Bacteria>Terrabacteria&nbsp;group>Firmicutes>Bacilli>Bacillales>Planococcaceae>Planococcus
Erysipelothrix sp. HDW6A	S	2714928	2682	0.03033	1351	0.008926	1182	0.005321	2379	0.02929	2682	0.03033	2144	0.02925	cellular&nbsp;organisms>Bacteria>Terrabacteria&nbsp;group>Firmicutes>Erysipelotrichia>Erysipelotrichales>Erysipelotrichaceae>Erysipelothrix>unclassified&nbsp;Erysipelothrix
Spiroplasma corruscae	S	216934	2682	0.03033	NA	NA	NA	NA	NA	NA	2682	0.03033	NA	NA	cellular&nbsp;organisms>Bacteria>Terrabacteria&nbsp;group>Tenericutes>Mollicutes>Entomoplasmatales>Spiroplasmataceae>Spiroplasma
Ureibacillus thermophilus	S	367743	4586	0.0303	4586	0.0303	3165	0.01425	NA	NA	1742	0.0197	NA	NA	cellular&nbsp;organisms>Bacteria>Terrabacteria&nbsp;group>Firmicutes>Bacilli>Bacillales>Planococcaceae>Ureibacillus
Halanaerobium hydrogeniformans	S	656519	2679	0.0303	NA	NA	NA	NA	1029	0.01267	2679	0.0303	NA	NA	cellular&nbsp;organisms>Bacteria>Terrabacteria&nbsp;group>Firmicutes>Clostridia>Halanaerobiales>Halanaerobiaceae>Halanaerobium
Echinicola sp. 20G	S	2781961	2678	0.03029	1422	0.009396	NA	NA	1485	0.01828	2678	0.03029	1103	0.01505	cellular&nbsp;organisms>Bacteria>FCB&nbsp;group>Bacteroidetes/Chlorobi&nbsp;group>Bacteroidetes>Cytophagia>Cytophagales>Cyclobacteriaceae>Echinicola>unclassified&nbsp;Echinicola
Ezakiella massiliensis	S	1852374	2457	0.03025	NA	NA	NA	NA	2457	0.03025	1367	0.01546	1814	0.02475	cellular&nbsp;organisms>Bacteria>Terrabacteria&nbsp;group>Firmicutes>Tissierellia>Tissierellia&nbsp;incertae&nbsp;sedis>Ezakiella
Ilyobacter polytropus	S	167642	2673	0.03023	NA	NA	NA	NA	1325	0.01631	2673	0.03023	1168	0.01593	cellular&nbsp;organisms>Bacteria>Fusobacteria>Fusobacteriia>Fusobacteriales>Fusobacteriaceae>Ilyobacter
Candidatus Arthromitus sp. SFB-rat-Yit	S	1041504	2672	0.03022	NA	NA	NA	NA	NA	NA	2672	0.03022	NA	NA	cellular&nbsp;organisms>Bacteria>Terrabacteria&nbsp;group>Firmicutes>Clostridia>Eubacteriales>Clostridiaceae>Candidatus&nbsp;Arthromitus>unclassified&nbsp;Candidatus&nbsp;Arthromitus
Mahella australiensis	S	252966	2670	0.0302	NA	NA	NA	NA	1560	0.01921	2670	0.0302	1896	0.02587	cellular&nbsp;organisms>Bacteria>Terrabacteria&nbsp;group>Firmicutes>Clostridia>Thermoanaerobacterales>Thermoanaerobacterales&nbsp;Family&nbsp;IV.&nbsp;Incertae&nbsp;Sedis>Mahella
Fibrella sp. ES10-3-2-2	S	1834519	2213	0.03019	1317	0.008702	NA	NA	2030	0.02499	NA	NA	2213	0.03019	cellular&nbsp;organisms>Bacteria>FCB&nbsp;group>Bacteroidetes/Chlorobi&nbsp;group>Bacteroidetes>Cytophagia>Cytophagales>Cytophagaceae>Fibrella>unclassified&nbsp;Fibrella
Geobacter sulfurreducens	S	35554	2623	0.03018	2374	0.01569	2623	0.01181	2442	0.03007	NA	NA	2212	0.03018	cellular&nbsp;organisms>Bacteria>Proteobacteria>delta/epsilon&nbsp;subdivisions>Deltaproteobacteria>Desulfuromonadales>Geobacteraceae>Geobacter
Hymenobacter sp. NBH84	S	2596915	2450	0.03017	1450	0.009581	NA	NA	2450	0.03017	NA	NA	2025	0.02763	cellular&nbsp;organisms>Bacteria>FCB&nbsp;group>Bacteroidetes/Chlorobi&nbsp;group>Bacteroidetes>Cytophagia>Cytophagales>Hymenobacteraceae>Hymenobacter>unclassified&nbsp;Hymenobacter
Vibrio vulnificus	S	672	2217	0.03015	1852	0.01224	2031	0.009144	2133	0.02626	2217	0.02507	2210	0.03015	cellular&nbsp;organisms>Bacteria>Proteobacteria>Gammaproteobacteria>Vibrionales>Vibrionaceae>Vibrio
Staphylococcus capitis	S	29388	2665	0.03014	2121	0.01401	1589	0.007154	1445	0.01779	2665	0.03014	NA	NA	cellular&nbsp;organisms>Bacteria>Terrabacteria&nbsp;group>Firmicutes>Bacilli>Bacillales>Staphylococcaceae>Staphylococcus
Lacinutrix sp. WUR7	S	2653681	4555	0.0301	4555	0.0301	4353	0.0196	NA	NA	2431	0.02749	NA	NA	cellular&nbsp;organisms>Bacteria>FCB&nbsp;group>Bacteroidetes/Chlorobi&nbsp;group>Bacteroidetes>Flavobacteriia>Flavobacteriales>Flavobacteriaceae>Lacinutrix>unclassified&nbsp;Lacinutrix
Treponema pedis	S	409322	2428	0.03009	2221	0.01467	NA	NA	1625	0.02001	2428	0.02746	2206	0.03009	cellular&nbsp;organisms>Bacteria>Spirochaetes>Spirochaetia>Spirochaetales>Spirochaetaceae>Treponema
Pelosinus fermentans	S	365349	2657	0.03005	1050	0.006938	NA	NA	1533	0.01888	2657	0.03005	1815	0.02476	cellular&nbsp;organisms>Bacteria>Terrabacteria&nbsp;group>Firmicutes>Negativicutes>Selenomonadales>Sporomusaceae>Pelosinus
Ralstonia pickettii	S	329	2202	0.03004	NA	NA	NA	NA	2190	0.02696	NA	NA	2202	0.03004	cellular&nbsp;organisms>Bacteria>Proteobacteria>Betaproteobacteria>Burkholderiales>Burkholderiaceae>Ralstonia
Rhizobacter gummiphilus	S	946333	2215	0.03004	1510	0.009977	1869	0.008414	2215	0.02727	NA	NA	2202	0.03004	cellular&nbsp;organisms>Bacteria>Proteobacteria>Betaproteobacteria>Burkholderiales>Burkholderiales&nbsp;genera&nbsp;incertae&nbsp;sedis>Rhizobacter
Streptomyces antibioticus	S	1890	4547	0.03004	4547	0.03004	NA	NA	1811	0.0223	NA	NA	1652	0.02254	cellular&nbsp;organisms>Bacteria>Terrabacteria&nbsp;group>Actinobacteria>Actinomycetia>Streptomycetales>Streptomycetaceae>Streptomyces
Streptomyces sp. GS7	S	2692234	2202	0.03004	NA	NA	NA	NA	1901	0.02341	NA	NA	2202	0.03004	cellular&nbsp;organisms>Bacteria>Terrabacteria&nbsp;group>Actinobacteria>Actinomycetia>Streptomycetales>Streptomycetaceae>Streptomyces>unclassified&nbsp;Streptomyces
Ligilactobacillus animalis	S	1605	2650	0.02997	NA	NA	NA	NA	NA	NA	2650	0.02997	NA	NA	cellular&nbsp;organisms>Bacteria>Terrabacteria&nbsp;group>Firmicutes>Bacilli>Lactobacillales>Lactobacillaceae>Ligilactobacillus
Sutterella faecalis	S	2584944	2215	0.02996	1276	0.008431	1524	0.006861	2215	0.02727	NA	NA	2196	0.02996	cellular&nbsp;organisms>Bacteria>Proteobacteria>Betaproteobacteria>Burkholderiales>Sutterellaceae>Sutterella
Rivularia sp. PCC 7116	S	373994	3116	0.02993	3116	0.02059	NA	NA	2039	0.02511	1706	0.01929	2194	0.02993	cellular&nbsp;organisms>Bacteria>Terrabacteria&nbsp;group>Cyanobacteria/Melainabacteria&nbsp;group>Cyanobacteria>Nostocales>Rivulariaceae>Rivularia>unclassified&nbsp;Rivularia&nbsp;(in:&nbsp;Bacteria)
Thermacetogenium phaeum	S	85874	2429	0.02991	NA	NA	NA	NA	2429	0.02991	NA	NA	2167	0.02956	cellular&nbsp;organisms>Bacteria>Terrabacteria&nbsp;group>Firmicutes>Clostridia>Thermoanaerobacterales>Thermoanaerobacteraceae>Thermacetogenium
Kitasatospora albolonga	S	68173	2192	0.0299	NA	NA	NA	NA	NA	NA	NA	NA	2192	0.0299	cellular&nbsp;organisms>Bacteria>Terrabacteria&nbsp;group>Actinobacteria>Actinomycetia>Streptomycetales>Streptomycetaceae>Kitasatospora
Gardnerella vaginalis	S	2702	2641	0.02987	NA	NA	NA	NA	NA	NA	2641	0.02987	NA	NA	cellular&nbsp;organisms>Bacteria>Terrabacteria&nbsp;group>Actinobacteria>Actinomycetia>Bifidobacteriales>Bifidobacteriaceae>Gardnerella
Amycolatopsis sp. YIM 10	S	2653857	2189	0.02986	NA	NA	1585	0.007136	1915	0.02358	NA	NA	2189	0.02986	cellular&nbsp;organisms>Bacteria>Terrabacteria&nbsp;group>Actinobacteria>Actinomycetia>Pseudonocardiales>Pseudonocardiaceae>Amycolatopsis>unclassified&nbsp;Amycolatopsis
Mycolicibacterium hassiacum	S	46351	2424	0.02985	NA	NA	NA	NA	2424	0.02985	NA	NA	1432	0.01954	cellular&nbsp;organisms>Bacteria>Terrabacteria&nbsp;group>Actinobacteria>Actinomycetia>Corynebacteriales>Mycobacteriaceae>Mycolicibacterium
Streptomyces sp. 2323.1	S	1938841	2187	0.02984	NA	NA	NA	NA	2166	0.02667	NA	NA	2187	0.02984	cellular&nbsp;organisms>Bacteria>Terrabacteria&nbsp;group>Actinobacteria>Actinomycetia>Streptomycetales>Streptomycetaceae>Streptomyces>unclassified&nbsp;Streptomyces
Desulfuromonas sp. DDH964	S	1823759	2423	0.02983	1595	0.01054	1859	0.008369	2423	0.02983	NA	NA	2170	0.0296	cellular&nbsp;organisms>Bacteria>Proteobacteria>delta/epsilon&nbsp;subdivisions>Deltaproteobacteria>Desulfuromonadales>Desulfuromonadaceae>Desulfuromonas>unclassified&nbsp;Desulfuromonas
Candidatus Kuenenia stuttgartiensis	S	174633	2365	0.02982	1096	0.007242	1223	0.005506	2365	0.02912	NA	NA	2186	0.02982	cellular&nbsp;organisms>Bacteria>PVC&nbsp;group>Planctomycetes>Candidatus&nbsp;Brocadiae>Candidatus&nbsp;Brocadiales>Candidatus&nbsp;Brocadiaceae>Candidatus&nbsp;Kuenenia
Candidatus Izimaplasma sp. HR1	S	1541959	2630	0.02982	1431	0.009455	1141	0.005137	2422	0.02982	2630	0.02974	1825	0.0249	cellular&nbsp;organisms>Bacteria>Terrabacteria&nbsp;group>Tenericutes>Tenericutes&nbsp;incertae&nbsp;sedis>Candidatus&nbsp;Izimaplasma>unclassified&nbsp;Candidatus&nbsp;Izimaplasma
Phytohabitans suffuscus	S	624315	2419	0.02978	NA	NA	1917	0.00863	2419	0.02978	NA	NA	2013	0.02746	cellular&nbsp;organisms>Bacteria>Terrabacteria&nbsp;group>Actinobacteria>Actinomycetia>Micromonosporales>Micromonosporaceae>Phytohabitans
Mesoplasma tabanidae	S	219745	4503	0.02975	4503	0.02975	NA	NA	NA	NA	NA	NA	NA	NA	cellular&nbsp;organisms>Bacteria>Terrabacteria&nbsp;group>Tenericutes>Mollicutes>Entomoplasmatales>Entomoplasmataceae>Mesoplasma
Saccharothrix espanaensis	S	103731	2316	0.02974	NA	NA	2056	0.009256	2316	0.02852	NA	NA	2180	0.02974	cellular&nbsp;organisms>Bacteria>Terrabacteria&nbsp;group>Actinobacteria>Actinomycetia>Pseudonocardiales>Pseudonocardiaceae>Saccharothrix
Hymenobacter oligotrophus	S	2319843	2179	0.02973	1215	0.008028	NA	NA	1971	0.02427	NA	NA	2179	0.02973	cellular&nbsp;organisms>Bacteria>FCB&nbsp;group>Bacteroidetes/Chlorobi&nbsp;group>Bacteroidetes>Cytophagia>Cytophagales>Hymenobacteraceae>Hymenobacter
Winogradskyella sp. J14-2	S	1936080	4591	0.02973	4500	0.02973	4591	0.02067	1229	0.01513	1171	0.01324	NA	NA	cellular&nbsp;organisms>Bacteria>FCB&nbsp;group>Bacteroidetes/Chlorobi&nbsp;group>Bacteroidetes>Flavobacteriia>Flavobacteriales>Flavobacteriaceae>Winogradskyella>unclassified&nbsp;Winogradskyella
Oceanihabitans sp. IOP_32	S	2529032	4498	0.02972	4498	0.02972	3590	0.01616	1862	0.02293	NA	NA	NA	NA	cellular&nbsp;organisms>Bacteria>FCB&nbsp;group>Bacteroidetes/Chlorobi&nbsp;group>Bacteroidetes>Flavobacteriia>Flavobacteriales>Flavobacteriaceae>Oceanihabitans>unclassified&nbsp;Oceanihabitans
Flavobacterium sp. CLA17	S	2724135	5732	0.0297	4495	0.0297	5732	0.02581	1686	0.02076	NA	NA	1376	0.01877	cellular&nbsp;organisms>Bacteria>FCB&nbsp;group>Bacteroidetes/Chlorobi&nbsp;group>Bacteroidetes>Flavobacteriia>Flavobacteriales>Flavobacteriaceae>Flavobacterium>unclassified&nbsp;Flavobacterium
Peribacillus butanolivorans	S	421767	3000	0.02969	3000	0.01982	1784	0.008032	1695	0.02087	1901	0.0215	2176	0.02969	cellular&nbsp;organisms>Bacteria>Terrabacteria&nbsp;group>Firmicutes>Bacilli>Bacillales>Bacillaceae>Peribacillus
Streptomyces sp. 3214.6	S	1882757	2351	0.02966	NA	NA	NA	NA	2351	0.02895	NA	NA	2174	0.02966	cellular&nbsp;organisms>Bacteria>Terrabacteria&nbsp;group>Actinobacteria>Actinomycetia>Streptomycetales>Streptomycetaceae>Streptomyces>unclassified&nbsp;Streptomyces
Rufibacter tibetensis	S	512763	2173	0.02964	1530	0.01011	NA	NA	1978	0.02435	1882	0.02128	2173	0.02964	cellular&nbsp;organisms>Bacteria>FCB&nbsp;group>Bacteroidetes/Chlorobi&nbsp;group>Bacteroidetes>Cytophagia>Cytophagales>Hymenobacteraceae>Rufibacter
Agrobacterium vitis	S	373	2202	0.02958	1461	0.009653	1622	0.007302	2202	0.02711	NA	NA	2168	0.02958	cellular&nbsp;organisms>Bacteria>Proteobacteria>Alphaproteobacteria>Hyphomicrobiales>Rhizobiaceae>Rhizobium/Agrobacterium&nbsp;group>Agrobacterium
Streptomyces rectiverticillatus	S	173860	2168	0.02958	NA	NA	NA	NA	2044	0.02517	NA	NA	2168	0.02958	cellular&nbsp;organisms>Bacteria>Terrabacteria&nbsp;group>Actinobacteria>Actinomycetia>Streptomycetales>Streptomycetaceae>Streptomyces
Latilactobacillus curvatus	S	28038	2615	0.02957	NA	NA	NA	NA	NA	NA	2615	0.02957	NA	NA	cellular&nbsp;organisms>Bacteria>Terrabacteria&nbsp;group>Firmicutes>Bacilli>Lactobacillales>Lactobacillaceae>Latilactobacillus
Pedobacter ginsengisoli	S	363852	2613	0.02955	1747	0.01154	1720	0.007743	1743	0.02146	2613	0.02955	1371	0.0187	cellular&nbsp;organisms>Bacteria>FCB&nbsp;group>Bacteroidetes/Chlorobi&nbsp;group>Bacteroidetes>Sphingobacteriia>Sphingobacteriales>Sphingobacteriaceae>Pedobacter
Stenotrophomonas rhizophila	S	216778	2171	0.02952	1398	0.009237	1571	0.007073	2171	0.02673	NA	NA	2164	0.02952	cellular&nbsp;organisms>Bacteria>Proteobacteria>Gammaproteobacteria>Xanthomonadales>Xanthomonadaceae>Stenotrophomonas
Niastella koreensis	S	354356	2393	0.02946	1668	0.01102	1500	0.006753	2393	0.02946	2165	0.02449	1987	0.02711	cellular&nbsp;organisms>Bacteria>FCB&nbsp;group>Bacteroidetes/Chlorobi&nbsp;group>Bacteroidetes>Chitinophagia>Chitinophagales>Chitinophagaceae>Niastella
Liquorilactobacillus nagelii	S	82688	2605	0.02946	NA	NA	NA	NA	NA	NA	2605	0.02946	NA	NA	cellular&nbsp;organisms>Bacteria>Terrabacteria&nbsp;group>Firmicutes>Bacilli>Lactobacillales>Lactobacillaceae>Liquorilactobacillus
Formosa agariphila	S	320324	4457	0.02945	4457	0.02945	3746	0.01686	1440	0.01773	1400	0.01583	NA	NA	cellular&nbsp;organisms>Bacteria>FCB&nbsp;group>Bacteroidetes/Chlorobi&nbsp;group>Bacteroidetes>Flavobacteriia>Flavobacteriales>Flavobacteriaceae>Formosa
Cellulomonas shaoxiangyii	S	2566013	2315	0.02944	NA	NA	2315	0.01042	1625	0.02001	NA	NA	2158	0.02944	cellular&nbsp;organisms>Bacteria>Terrabacteria&nbsp;group>Actinobacteria>Actinomycetia>Micrococcales>Cellulomonadaceae>Cellulomonas
Rubrivivax gelatinosus	S	28068	2157	0.02943	NA	NA	1344	0.006051	2152	0.0265	NA	NA	2157	0.02943	cellular&nbsp;organisms>Bacteria>Proteobacteria>Betaproteobacteria>Burkholderiales>Burkholderiales&nbsp;genera&nbsp;incertae&nbsp;sedis>Rubrivivax
Streptomyces griseoviridis	S	45398	2154	0.02939	NA	NA	1698	0.007644	1879	0.02314	NA	NA	2154	0.02939	cellular&nbsp;organisms>Bacteria>Terrabacteria&nbsp;group>Actinobacteria>Actinomycetia>Streptomycetales>Streptomycetaceae>Streptomyces
Bacillus sp. DSL-17	S	2567941	3120	0.02935	3120	0.02061	2124	0.009562	1633	0.02011	2595	0.02935	1639	0.02236	cellular&nbsp;organisms>Bacteria>Terrabacteria&nbsp;group>Firmicutes>Bacilli>Bacillales>Bacillaceae>Bacillus>unclassified&nbsp;Bacillus&nbsp;(in:&nbsp;Bacteria)
Formosa sediminum	S	2594004	4976	0.02934	4441	0.02934	4976	0.0224	NA	NA	1346	0.01522	NA	NA	cellular&nbsp;organisms>Bacteria>FCB&nbsp;group>Bacteroidetes/Chlorobi&nbsp;group>Bacteroidetes>Flavobacteriia>Flavobacteriales>Flavobacteriaceae>Formosa
Bacillus sp. HD4P25	S	2779776	2594	0.02934	2230	0.01473	1536	0.006915	1522	0.01874	2594	0.02934	1496	0.02041	cellular&nbsp;organisms>Bacteria>Terrabacteria&nbsp;group>Firmicutes>Bacilli>Bacillales>Bacillaceae>Bacillus>unclassified&nbsp;Bacillus&nbsp;(in:&nbsp;Bacteria)
Pelobacter propionicus	S	29543	2149	0.02932	NA	NA	NA	NA	2086	0.02568	NA	NA	2149	0.02932	cellular&nbsp;organisms>Bacteria>Proteobacteria>delta/epsilon&nbsp;subdivisions>Deltaproteobacteria>Desulfuromonadales>Desulfuromonadaceae>Pelobacter
Roseovarius indicus	S	540747	2380	0.0293	NA	NA	NA	NA	2380	0.0293	NA	NA	NA	NA	cellular&nbsp;organisms>Bacteria>Proteobacteria>Alphaproteobacteria>Rhodobacterales>Rhodobacteraceae>Roseovarius
Francisella tularensis	S	263	2590	0.02929	NA	NA	NA	NA	NA	NA	2590	0.02929	NA	NA	cellular&nbsp;organisms>Bacteria>Proteobacteria>Gammaproteobacteria>Thiotrichales>Francisellaceae>Francisella
Streptomyces viridosporus	S	67581	2147	0.02929	NA	NA	NA	NA	NA	NA	NA	NA	2147	0.02929	cellular&nbsp;organisms>Bacteria>Terrabacteria&nbsp;group>Actinobacteria>Actinomycetia>Streptomycetales>Streptomycetaceae>Streptomyces
Polaribacter sp. Hel1_33_78	S	1336804	5133	0.02926	4428	0.02926	5133	0.02311	1826	0.02248	1641	0.01856	NA	NA	cellular&nbsp;organisms>Bacteria>FCB&nbsp;group>Bacteroidetes/Chlorobi&nbsp;group>Bacteroidetes>Flavobacteriia>Flavobacteriales>Flavobacteriaceae>Polaribacter>unclassified&nbsp;Polaribacter
Kaistella flava (ex Peng et al. 2021)	S	2038776	4428	0.02926	4428	0.02926	3816	0.01718	1157	0.01425	NA	NA	NA	NA	cellular&nbsp;organisms>Bacteria>FCB&nbsp;group>Bacteroidetes/Chlorobi&nbsp;group>Bacteroidetes>Flavobacteriia>Flavobacteriales>Weeksellaceae>Chryseobacterium&nbsp;group>Kaistella
Pantoea agglomerans	S	549	2587	0.02926	NA	NA	1749	0.007874	NA	NA	2587	0.02926	NA	NA	cellular&nbsp;organisms>Bacteria>Proteobacteria>Gammaproteobacteria>Enterobacterales>Erwiniaceae>Pantoea>Pantoea&nbsp;agglomerans&nbsp;group
Bdellovibrio bacteriovorus	S	959	2357	0.02925	2001	0.01322	2042	0.009193	2311	0.02845	2357	0.02666	2144	0.02925	cellular&nbsp;organisms>Bacteria>Proteobacteria>Oligoflexia>Bdellovibrionales>Bdellovibrionaceae>Bdellovibrio
Sinorhizobium medicae	S	110321	2582	0.0292	NA	NA	NA	NA	NA	NA	2582	0.0292	NA	NA	cellular&nbsp;organisms>Bacteria>Proteobacteria>Alphaproteobacteria>Hyphomicrobiales>Rhizobiaceae>Sinorhizobium/Ensifer&nbsp;group>Sinorhizobium
Lacinutrix venerupis	S	1486034	6483	0.02919	3188	0.02106	6483	0.02919	NA	NA	NA	NA	NA	NA	cellular&nbsp;organisms>Bacteria>FCB&nbsp;group>Bacteroidetes/Chlorobi&nbsp;group>Bacteroidetes>Flavobacteriia>Flavobacteriales>Flavobacteriaceae>Lacinutrix
Actinoalloteichus hoggarensis	S	1470176	2343	0.02919	NA	NA	NA	NA	2343	0.02885	NA	NA	2140	0.02919	cellular&nbsp;organisms>Bacteria>Terrabacteria&nbsp;group>Actinobacteria>Actinomycetia>Pseudonocardiales>Pseudonocardiaceae>Actinoalloteichus
Candidatus Cloacimonas acidaminovorans	S	456827	2136	0.02914	1274	0.008418	1243	0.005596	1481	0.01823	NA	NA	2136	0.02914	cellular&nbsp;organisms>Bacteria>FCB&nbsp;group>Candidatus&nbsp;Cloacimonetes>Candidatus&nbsp;Cloacimonas
Desulfosporosinus orientis	S	1563	2575	0.02912	1225	0.008094	NA	NA	1339	0.01649	2575	0.02912	1601	0.02184	cellular&nbsp;organisms>Bacteria>Terrabacteria&nbsp;group>Firmicutes>Clostridia>Eubacteriales>Peptococcaceae>Desulfosporosinus
Martelella mediterranea	S	293089	2134	0.02911	NA	NA	NA	NA	NA	NA	NA	NA	2134	0.02911	cellular&nbsp;organisms>Bacteria>Proteobacteria>Alphaproteobacteria>Hyphomicrobiales>Aurantimonadaceae>Martelella
Flavobacterium sp. CJ74	S	2294119	2257	0.0291	2098	0.01386	2257	0.01016	2244	0.02763	1672	0.01891	2133	0.0291	cellular&nbsp;organisms>Bacteria>FCB&nbsp;group>Bacteroidetes/Chlorobi&nbsp;group>Bacteroidetes>Flavobacteriia>Flavobacteriales>Flavobacteriaceae>Flavobacterium>unclassified&nbsp;Flavobacterium
Melittangium boletus	S	83453	2363	0.02909	1341	0.00886	1653	0.007442	2363	0.02909	NA	NA	2032	0.02772	cellular&nbsp;organisms>Bacteria>Proteobacteria>delta/epsilon&nbsp;subdivisions>Deltaproteobacteria>Myxococcales>Cystobacterineae>Archangiaceae>Melittangium
Dehalococcoides mccartyi	S	61435	2131	0.02907	NA	NA	1409	0.006343	2010	0.02475	1498	0.01694	2131	0.02907	cellular&nbsp;organisms>Bacteria>Terrabacteria&nbsp;group>Chloroflexi>Dehalococcoidia>Dehalococcoidales>Dehalococcoidaceae>Dehalococcoides
Enterococcus hirae	S	1354	2831	0.02903	2831	0.01871	NA	NA	1610	0.01982	2567	0.02903	1699	0.02318	cellular&nbsp;organisms>Bacteria>Terrabacteria&nbsp;group>Firmicutes>Bacilli>Lactobacillales>Enterococcaceae>Enterococcus
Flavobacterium nitrogenifigens	S	1617283	6007	0.02898	4386	0.02898	6007	0.02704	NA	NA	2207	0.02496	NA	NA	cellular&nbsp;organisms>Bacteria>FCB&nbsp;group>Bacteroidetes/Chlorobi&nbsp;group>Bacteroidetes>Flavobacteriia>Flavobacteriales>Flavobacteriaceae>Flavobacterium
Runella slithyformis	S	106	2182	0.02894	1623	0.01072	1397	0.006289	2182	0.02687	1582	0.01789	2121	0.02894	cellular&nbsp;organisms>Bacteria>FCB&nbsp;group>Bacteroidetes/Chlorobi&nbsp;group>Bacteroidetes>Cytophagia>Cytophagales>Cytophagaceae>Runella
Vibrio campbellii	S	680	2559	0.02894	NA	NA	NA	NA	1902	0.02342	2559	0.02894	1763	0.02405	cellular&nbsp;organisms>Bacteria>Proteobacteria>Gammaproteobacteria>Vibrionales>Vibrionaceae>Vibrio>Vibrio&nbsp;harveyi&nbsp;group
Paenibacillus durus	S	44251	2348	0.02891	1555	0.01027	2114	0.009517	2348	0.02891	1312	0.01484	1825	0.0249	cellular&nbsp;organisms>Bacteria>Terrabacteria&nbsp;group>Firmicutes>Bacilli>Bacillales>Paenibacillaceae>Paenibacillus
Lacinutrix sp. Bg11-31	S	2057808	4426	0.0289	4374	0.0289	4426	0.01993	1346	0.01657	NA	NA	NA	NA	cellular&nbsp;organisms>Bacteria>FCB&nbsp;group>Bacteroidetes/Chlorobi&nbsp;group>Bacteroidetes>Flavobacteriia>Flavobacteriales>Flavobacteriaceae>Lacinutrix>unclassified&nbsp;Lacinutrix
Bacillus mycoides	S	1405	2555	0.0289	2137	0.01412	1682	0.007572	NA	NA	2555	0.0289	1566	0.02136	cellular&nbsp;organisms>Bacteria>Terrabacteria&nbsp;group>Firmicutes>Bacilli>Bacillales>Bacillaceae>Bacillus>Bacillus&nbsp;cereus&nbsp;group
Xylanimonas cellulosilytica	S	186189	2118	0.02889	NA	NA	NA	NA	NA	NA	NA	NA	2118	0.02889	cellular&nbsp;organisms>Bacteria>Terrabacteria&nbsp;group>Actinobacteria>Actinomycetia>Micrococcales>Promicromonosporaceae>Xylanimonas
Amycolatopsis sp. FDAARGOS 1241	S	2778070	2625	0.02889	2625	0.01734	1772	0.007978	2346	0.02889	NA	NA	2004	0.02734	cellular&nbsp;organisms>Bacteria>Terrabacteria&nbsp;group>Actinobacteria>Actinomycetia>Pseudonocardiales>Pseudonocardiaceae>Amycolatopsis>unclassified&nbsp;Amycolatopsis
Kibdelosporangium phytohabitans	S	860235	2193	0.02888	NA	NA	1556	0.007005	2193	0.027	NA	NA	2117	0.02888	cellular&nbsp;organisms>Bacteria>Terrabacteria&nbsp;group>Actinobacteria>Actinomycetia>Pseudonocardiales>Pseudonocardiaceae>Kibdelosporangium
Rubrobacter sp. SCSIO 52915	S	2653852	2222	0.02888	1168	0.007717	1669	0.007514	2222	0.02736	NA	NA	2117	0.02888	cellular&nbsp;organisms>Bacteria>Terrabacteria&nbsp;group>Actinobacteria>Rubrobacteria>Rubrobacterales>Rubrobacteraceae>Rubrobacter>unclassified&nbsp;Rubrobacter
Sphingopyxis terrae	S	33052	2345	0.02887	NA	NA	NA	NA	2345	0.02887	NA	NA	NA	NA	cellular&nbsp;organisms>Bacteria>Proteobacteria>Alphaproteobacteria>Sphingomonadales>Sphingomonadaceae>Sphingopyxis
Bacillus dafuensis	S	1742359	2551	0.02885	2233	0.01475	1542	0.006942	1306	0.01608	2551	0.02885	NA	NA	cellular&nbsp;organisms>Bacteria>Terrabacteria&nbsp;group>Firmicutes>Bacilli>Bacillales>Bacillaceae>Bacillus
Paenibacillus odorifer	S	189426	3342	0.02885	2395	0.01582	3342	0.01505	1450	0.01785	2551	0.02885	1914	0.02611	cellular&nbsp;organisms>Bacteria>Terrabacteria&nbsp;group>Firmicutes>Bacilli>Bacillales>Paenibacillaceae>Paenibacillus
Azospirillum thermophilum	S	2202148	2113	0.02883	NA	NA	1523	0.006857	1999	0.02461	NA	NA	2113	0.02883	cellular&nbsp;organisms>Bacteria>Proteobacteria>Alphaproteobacteria>Rhodospirillales>Rhodospirillaceae>Azospirillum
Brachyspira hyodysenteriae	S	159	2549	0.02883	NA	NA	NA	NA	2050	0.02524	2549	0.02883	1690	0.02306	cellular&nbsp;organisms>Bacteria>Spirochaetes>Spirochaetia>Brachyspirales>Brachyspiraceae>Brachyspira
Staphylococcus xylosus	S	1288	2547	0.02881	1507	0.009957	NA	NA	1253	0.01543	2547	0.02881	NA	NA	cellular&nbsp;organisms>Bacteria>Terrabacteria&nbsp;group>Firmicutes>Bacilli>Bacillales>Staphylococcaceae>Staphylococcus
Elizabethkingia sp. JS20170427COW	S	2583851	4359	0.0288	4359	0.0288	3959	0.01782	1819	0.0224	1894	0.02142	1239	0.0169	cellular&nbsp;organisms>Bacteria>FCB&nbsp;group>Bacteroidetes/Chlorobi&nbsp;group>Bacteroidetes>Flavobacteriia>Flavobacteriales>Weeksellaceae>Elizabethkingia>unclassified&nbsp;Elizabethkingia
Bradyrhizobium sp. 6(2017)	S	1197460	2108	0.02876	NA	NA	NA	NA	1745	0.02149	NA	NA	2108	0.02876	cellular&nbsp;organisms>Bacteria>Proteobacteria>Alphaproteobacteria>Hyphomicrobiales>Bradyrhizobiaceae>Bradyrhizobium>unclassified&nbsp;Bradyrhizobium
Phycisphaera mikurensis	S	547188	2236	0.02874	1227	0.008107	1571	0.007073	2236	0.02753	NA	NA	2107	0.02874	cellular&nbsp;organisms>Bacteria>PVC&nbsp;group>Planctomycetes>Phycisphaerae>Phycisphaerales>Phycisphaeraceae>Phycisphaera
Arachidicoccus sp. BS20	S	1850526	2365	0.02873	1242	0.008206	1291	0.005812	2333	0.02873	2365	0.02675	2060	0.0281	cellular&nbsp;organisms>Bacteria>FCB&nbsp;group>Bacteroidetes/Chlorobi&nbsp;group>Bacteroidetes>Chitinophagia>Chitinophagales>Chitinophagaceae>Arachidicoccus>unclassified&nbsp;Arachidicoccus
Echinicola rosea	S	1807691	2332	0.02871	1496	0.009884	NA	NA	2332	0.02871	1621	0.01833	1989	0.02713	cellular&nbsp;organisms>Bacteria>FCB&nbsp;group>Bacteroidetes/Chlorobi&nbsp;group>Bacteroidetes>Cytophagia>Cytophagales>Cyclobacteriaceae>Echinicola
Tsukamurella paurometabola	S	2061	2307	0.0287	NA	NA	2240	0.01008	2307	0.02841	NA	NA	2104	0.0287	cellular&nbsp;organisms>Bacteria>Terrabacteria&nbsp;group>Actinobacteria>Actinomycetia>Corynebacteriales>Tsukamurellaceae>Tsukamurella
Thermoanaerosceptrum fracticalcis	S	1712410	2104	0.0287	1156	0.007638	1138	0.005123	1451	0.01787	1340	0.01515	2104	0.0287	cellular&nbsp;organisms>Bacteria>Terrabacteria&nbsp;group>Firmicutes>Clostridia>Eubacteriales>Peptococcaceae>Thermoanaerosceptrum
Stieleria neptunia	S	2527979	2102	0.02868	NA	NA	1364	0.006141	1808	0.02226	NA	NA	2102	0.02868	cellular&nbsp;organisms>Bacteria>PVC&nbsp;group>Planctomycetes>Planctomycetia>Pirellulales>Pirellulaceae>Stieleria
Dehalobacterium formicoaceticum	S	51515	2497	0.02868	NA	NA	NA	NA	1751	0.02156	2497	0.02824	2102	0.02868	cellular&nbsp;organisms>Bacteria>Terrabacteria&nbsp;group>Firmicutes>Clostridia>Eubacteriales>Peptococcaceae>Dehalobacterium
Myxococcus sp. SCHIC003	S	2813577	2324	0.02861	NA	NA	1907	0.008585	2324	0.02861	NA	NA	1659	0.02263	cellular&nbsp;organisms>Bacteria>Proteobacteria>delta/epsilon&nbsp;subdivisions>Deltaproteobacteria>Myxococcales>Cystobacterineae>Myxococcaceae>Myxococcus>unclassified&nbsp;Myxococcus
Sporosarcina sp. PTS2304	S	2283194	4330	0.02861	4330	0.02861	2564	0.01154	NA	NA	NA	NA	NA	NA	cellular&nbsp;organisms>Bacteria>Terrabacteria&nbsp;group>Firmicutes>Bacilli>Bacillales>Planococcaceae>Sporosarcina>unclassified&nbsp;Sporosarcina
Enterococcus casseliflavus	S	37734	3535	0.0286	3535	0.02336	NA	NA	NA	NA	2529	0.0286	NA	NA	cellular&nbsp;organisms>Bacteria>Terrabacteria&nbsp;group>Firmicutes>Bacilli>Lactobacillales>Enterococcaceae>Enterococcus
Micromonospora echinaurantiaca	S	47857	2321	0.02858	NA	NA	NA	NA	2321	0.02858	NA	NA	1926	0.02627	cellular&nbsp;organisms>Bacteria>Terrabacteria&nbsp;group>Actinobacteria>Actinomycetia>Micromonosporales>Micromonosporaceae>Micromonospora
Priestia flexa	S	86664	3804	0.02858	3804	0.02513	2978	0.01341	1828	0.02251	2527	0.02858	1510	0.0206	cellular&nbsp;organisms>Bacteria>Terrabacteria&nbsp;group>Firmicutes>Bacilli>Bacillales>Bacillaceae>Priestia
Pseudonocardia broussonetiae	S	2736640	2205	0.02853	NA	NA	1836	0.008266	2205	0.02715	NA	NA	2091	0.02853	cellular&nbsp;organisms>Bacteria>Terrabacteria&nbsp;group>Actinobacteria>Actinomycetia>Pseudonocardiales>Pseudonocardiaceae>Pseudonocardia
Streptomyces sp. CdTB01	S	1725411	2095	0.0285	NA	NA	NA	NA	2095	0.02579	NA	NA	2089	0.0285	cellular&nbsp;organisms>Bacteria>Terrabacteria&nbsp;group>Actinobacteria>Actinomycetia>Streptomycetales>Streptomycetaceae>Streptomyces>unclassified&nbsp;Streptomyces
Dehalobacter restrictus	S	55583	2520	0.0285	NA	NA	NA	NA	NA	NA	2520	0.0285	NA	NA	cellular&nbsp;organisms>Bacteria>Terrabacteria&nbsp;group>Firmicutes>Clostridia>Eubacteriales>Peptococcaceae>Dehalobacter
Fervidobacterium pennivorans	S	93466	2314	0.02849	NA	NA	NA	NA	2314	0.02849	1549	0.01752	NA	NA	cellular&nbsp;organisms>Bacteria>Thermotogae>Thermotogae>Thermotogales>Fervidobacteriaceae>Fervidobacterium
Echinicola vietnamensis	S	390884	2452	0.02848	1731	0.01144	NA	NA	2313	0.02848	2452	0.02773	1726	0.02355	cellular&nbsp;organisms>Bacteria>FCB&nbsp;group>Bacteroidetes/Chlorobi&nbsp;group>Bacteroidetes>Cytophagia>Cytophagales>Cyclobacteriaceae>Echinicola
Spirosoma montaniterrae	S	1178516	2313	0.02848	1161	0.007671	NA	NA	2313	0.02848	1457	0.01648	1319	0.01799	cellular&nbsp;organisms>Bacteria>FCB&nbsp;group>Bacteroidetes/Chlorobi&nbsp;group>Bacteroidetes>Cytophagia>Cytophagales>Cytophagaceae>Spirosoma
Intrasporangium calvum	S	53358	2087	0.02847	NA	NA	1548	0.006969	1797	0.02213	NA	NA	2087	0.02847	cellular&nbsp;organisms>Bacteria>Terrabacteria&nbsp;group>Actinobacteria>Actinomycetia>Micrococcales>Intrasporangiaceae>Intrasporangium
Polaribacter sp. MED152	S	313598	5342	0.02843	4303	0.02843	5342	0.02405	NA	NA	1291	0.0146	NA	NA	cellular&nbsp;organisms>Bacteria>FCB&nbsp;group>Bacteroidetes/Chlorobi&nbsp;group>Bacteroidetes>Flavobacteriia>Flavobacteriales>Flavobacteriaceae>Polaribacter>unclassified&nbsp;Polaribacter
Elizabethkingia meningoseptica	S	238	4301	0.02842	4301	0.02842	3768	0.01696	1504	0.01852	1644	0.01859	1114	0.0152	cellular&nbsp;organisms>Bacteria>FCB&nbsp;group>Bacteroidetes/Chlorobi&nbsp;group>Bacteroidetes>Flavobacteriia>Flavobacteriales>Weeksellaceae>Elizabethkingia
Lactobacillus sp. PC121B	S	1248330	4298	0.0284	4298	0.0284	NA	NA	NA	NA	NA	NA	NA	NA	cellular&nbsp;organisms>Bacteria>Terrabacteria&nbsp;group>Firmicutes>Bacilli>Lactobacillales>Lactobacillaceae>Lactobacillus>unclassified&nbsp;Lactobacillus
Psychroserpens sp. NJDZ02	S	2570561	4808	0.02838	4296	0.02838	4808	0.02165	NA	NA	2078	0.0235	NA	NA	cellular&nbsp;organisms>Bacteria>FCB&nbsp;group>Bacteroidetes/Chlorobi&nbsp;group>Bacteroidetes>Flavobacteriia>Flavobacteriales>Flavobacteriaceae>Psychroserpens>unclassified&nbsp;Psychroserpens
Lactobacillus terrae	S	2269374	2509	0.02838	NA	NA	NA	NA	NA	NA	2509	0.02838	NA	NA	cellular&nbsp;organisms>Bacteria>Terrabacteria&nbsp;group>Firmicutes>Bacilli>Lactobacillales>Lactobacillaceae>Lactobacillus
Azoarcus sp. DD4	S	2027405	2223	0.02835	NA	NA	2223	0.01001	1848	0.02275	NA	NA	2078	0.02835	cellular&nbsp;organisms>Bacteria>Proteobacteria>Betaproteobacteria>Rhodocyclales>Zoogloeaceae>Azoarcus>unclassified&nbsp;Azoarcus
Anoxybacter fermentans	S	1323375	2507	0.02835	NA	NA	NA	NA	1354	0.01667	2507	0.02835	1303	0.01778	cellular&nbsp;organisms>Bacteria>Terrabacteria&nbsp;group>Firmicutes>Clostridia>Halanaerobiales>Halanaerobiales&nbsp;incertae&nbsp;sedis>Anoxybacter
Paenibacillus sp. RUD330	S	2023772	2076	0.02832	NA	NA	1102	0.004961	1907	0.02348	NA	NA	2076	0.02832	cellular&nbsp;organisms>Bacteria>Terrabacteria&nbsp;group>Firmicutes>Bacilli>Bacillales>Paenibacillaceae>Paenibacillus>unclassified&nbsp;Paenibacillus
Streptosporangium sp. 'caverna'	S	2202249	2273	0.02828	NA	NA	1580	0.007113	2273	0.02799	NA	NA	2073	0.02828	cellular&nbsp;organisms>Bacteria>Terrabacteria&nbsp;group>Actinobacteria>Actinomycetia>Streptosporangiales>Streptosporangiaceae>Streptosporangium>unclassified&nbsp;Streptosporangium
Bradyrhizobium icense	S	1274631	2072	0.02827	NA	NA	NA	NA	1198	0.01475	NA	NA	2072	0.02827	cellular&nbsp;organisms>Bacteria>Proteobacteria>Alphaproteobacteria>Hyphomicrobiales>Bradyrhizobiaceae>Bradyrhizobium
Cellulomonas sp. H30R-01	S	2704467	2072	0.02827	NA	NA	1871	0.008423	2031	0.02501	NA	NA	2072	0.02827	cellular&nbsp;organisms>Bacteria>Terrabacteria&nbsp;group>Actinobacteria>Actinomycetia>Micrococcales>Cellulomonadaceae>Cellulomonas>unclassified&nbsp;Cellulomonas
Gordonia phthalatica	S	1136941	2295	0.02826	NA	NA	NA	NA	2295	0.02826	NA	NA	NA	NA	cellular&nbsp;organisms>Bacteria>Terrabacteria&nbsp;group>Actinobacteria>Actinomycetia>Corynebacteriales>Gordoniaceae>Gordonia
Acholeplasma hippikon	S	264636	2071	0.02825	1525	0.01008	1144	0.00515	2028	0.02497	1882	0.02128	2071	0.02825	cellular&nbsp;organisms>Bacteria>Terrabacteria&nbsp;group>Tenericutes>Mollicutes>Acholeplasmatales>Acholeplasmataceae>Acholeplasma
Mesobacillus foraminis	S	279826	2497	0.02824	1693	0.01119	1061	0.004777	1460	0.01798	2497	0.02824	1772	0.02417	cellular&nbsp;organisms>Bacteria>Terrabacteria&nbsp;group>Firmicutes>Bacilli>Bacillales>Bacillaceae>Mesobacillus
Acetobacterium sp. KB-1	S	2184575	2489	0.02824	NA	NA	NA	NA	2004	0.02467	2489	0.02815	2070	0.02824	cellular&nbsp;organisms>Bacteria>Terrabacteria&nbsp;group>Firmicutes>Clostridia>Eubacteriales>Eubacteriaceae>Acetobacterium>unclassified&nbsp;Acetobacterium
Desulfitobacterium hafniense	S	49338	2070	0.02824	1733	0.01145	1676	0.007545	2042	0.02514	1932	0.02185	2070	0.02824	cellular&nbsp;organisms>Bacteria>Terrabacteria&nbsp;group>Firmicutes>Clostridia>Eubacteriales>Peptococcaceae>Desulfitobacterium
Streptomyces incarnatus	S	665007	2292	0.02822	NA	NA	1960	0.008824	2292	0.02822	NA	NA	1882	0.02567	cellular&nbsp;organisms>Bacteria>Terrabacteria&nbsp;group>Actinobacteria>Actinomycetia>Streptomycetales>Streptomycetaceae>Streptomyces
Hymenobacter nivis	S	1850093	2242	0.02821	NA	NA	NA	NA	2242	0.0276	1932	0.02185	2068	0.02821	cellular&nbsp;organisms>Bacteria>FCB&nbsp;group>Bacteroidetes/Chlorobi&nbsp;group>Bacteroidetes>Cytophagia>Cytophagales>Hymenobacteraceae>Hymenobacter
Variovorax sp. PAMC26660	S	2762322	2291	0.02821	NA	NA	NA	NA	2291	0.02821	NA	NA	NA	NA	cellular&nbsp;organisms>Bacteria>Proteobacteria>Betaproteobacteria>Burkholderiales>Comamonadaceae>Variovorax>unclassified&nbsp;Variovorax
Streptomyces sp. SN-593	S	659352	2067	0.0282	NA	NA	1993	0.008972	1976	0.02433	NA	NA	2067	0.0282	cellular&nbsp;organisms>Bacteria>Terrabacteria&nbsp;group>Actinobacteria>Actinomycetia>Streptomycetales>Streptomycetaceae>Streptomyces>unclassified&nbsp;Streptomyces
Leadbetterella byssophila	S	316068	2289	0.02818	2124	0.01403	1851	0.008333	2289	0.02818	2187	0.02473	1325	0.01808	cellular&nbsp;organisms>Bacteria>FCB&nbsp;group>Bacteroidetes/Chlorobi&nbsp;group>Bacteroidetes>Cytophagia>Cytophagales>Cytophagaceae>Leadbetterella
Sphingobacterium sp. CZ-2	S	2557994	3931	0.02816	3414	0.02256	3931	0.0177	2287	0.02816	1491	0.01686	1730	0.0236	cellular&nbsp;organisms>Bacteria>FCB&nbsp;group>Bacteroidetes/Chlorobi&nbsp;group>Bacteroidetes>Sphingobacteriia>Sphingobacteriales>Sphingobacteriaceae>Sphingobacterium>unclassified&nbsp;Sphingobacterium
Caulobacter vibrioides	S	155892	2278	0.02816	NA	NA	2278	0.01026	2256	0.02778	NA	NA	2064	0.02816	cellular&nbsp;organisms>Bacteria>Proteobacteria>Alphaproteobacteria>Caulobacterales>Caulobacteraceae>Caulobacter
Rhodoplanes sp. Z2-YC6860	S	674703	2061	0.02812	NA	NA	1220	0.005492	1959	0.02412	NA	NA	2061	0.02812	cellular&nbsp;organisms>Bacteria>Proteobacteria>Alphaproteobacteria>Hyphomicrobiales>Hyphomicrobiaceae>Rhodoplanes>unclassified&nbsp;Rhodoplanes
Streptomyces gardneri	S	66892	2140	0.02812	NA	NA	NA	NA	2140	0.02635	NA	NA	2061	0.02812	cellular&nbsp;organisms>Bacteria>Terrabacteria&nbsp;group>Actinobacteria>Actinomycetia>Streptomycetales>Streptomycetaceae>Streptomyces
Clostridium sp. 'deep sea'	S	2779445	2486	0.02812	NA	NA	NA	NA	1886	0.02322	2486	0.02812	1693	0.0231	cellular&nbsp;organisms>Bacteria>Terrabacteria&nbsp;group>Firmicutes>Clostridia>Eubacteriales>Clostridiaceae>Clostridium>unclassified&nbsp;Clostridium
Spirosoma aureum	S	2692134	2282	0.0281	NA	NA	NA	NA	2282	0.0281	NA	NA	1883	0.02569	cellular&nbsp;organisms>Bacteria>FCB&nbsp;group>Bacteroidetes/Chlorobi&nbsp;group>Bacteroidetes>Cytophagia>Cytophagales>Cytophagaceae>Spirosoma
Actinoplanes missouriensis	S	1866	2071	0.02809	NA	NA	1665	0.007496	2071	0.0255	NA	NA	2059	0.02809	cellular&nbsp;organisms>Bacteria>Terrabacteria&nbsp;group>Actinobacteria>Actinomycetia>Micromonosporales>Micromonosporaceae>Actinoplanes
Staphylococcus saprophyticus	S	29385	2771	0.02809	1290	0.008523	2771	0.01248	1356	0.0167	2484	0.02809	NA	NA	cellular&nbsp;organisms>Bacteria>Terrabacteria&nbsp;group>Firmicutes>Bacilli>Bacillales>Staphylococcaceae>Staphylococcus
Shewanella baltica	S	62322	6237	0.02808	NA	NA	6237	0.02808	NA	NA	NA	NA	NA	NA	cellular&nbsp;organisms>Bacteria>Proteobacteria>Gammaproteobacteria>Alteromonadales>Shewanellaceae>Shewanella
Halobacteroides halobius	S	42422	2483	0.02808	NA	NA	NA	NA	1085	0.01336	2483	0.02808	1120	0.01528	cellular&nbsp;organisms>Bacteria>Terrabacteria&nbsp;group>Firmicutes>Clostridia>Halanaerobiales>Halobacteroidaceae>Halobacteroides
Thiospirochaeta perfilievii	S	252967	2481	0.02806	1268	0.008378	NA	NA	1248	0.01537	2481	0.02806	1362	0.01858	cellular&nbsp;organisms>Bacteria>Spirochaetes>Spirochaetia>Spirochaetales>Spirochaetaceae>Thiospirochaeta
Mucilaginibacter celer	S	2305508	2056	0.02805	1230	0.008127	NA	NA	1931	0.02378	1417	0.01603	2056	0.02805	cellular&nbsp;organisms>Bacteria>FCB&nbsp;group>Bacteroidetes/Chlorobi&nbsp;group>Bacteroidetes>Sphingobacteriia>Sphingobacteriales>Sphingobacteriaceae>Mucilaginibacter
Caulobacter rhizosphaerae	S	2010972	2055	0.02803	NA	NA	NA	NA	1683	0.02072	NA	NA	2055	0.02803	cellular&nbsp;organisms>Bacteria>Proteobacteria>Alphaproteobacteria>Caulobacterales>Caulobacteraceae>Caulobacter
Streptomyces alboflavus	S	67267	2151	0.02803	NA	NA	1764	0.007942	2151	0.02648	NA	NA	2055	0.02803	cellular&nbsp;organisms>Bacteria>Terrabacteria&nbsp;group>Actinobacteria>Actinomycetia>Streptomycetales>Streptomycetaceae>Streptomyces
Flavobacterium faecale	S	1355330	5840	0.028	4238	0.028	5840	0.02629	1086	0.01337	1522	0.01721	1173	0.016	cellular&nbsp;organisms>Bacteria>FCB&nbsp;group>Bacteroidetes/Chlorobi&nbsp;group>Bacteroidetes>Flavobacteriia>Flavobacteriales>Flavobacteriaceae>Flavobacterium
Polaribacter sp. KT25b	S	1855336	4697	0.02798	4234	0.02798	4697	0.02115	1494	0.01839	1292	0.01461	NA	NA	cellular&nbsp;organisms>Bacteria>FCB&nbsp;group>Bacteroidetes/Chlorobi&nbsp;group>Bacteroidetes>Flavobacteriia>Flavobacteriales>Flavobacteriaceae>Polaribacter>unclassified&nbsp;Polaribacter
Nocardioides sp. S5	S	2017486	2051	0.02798	NA	NA	NA	NA	2044	0.02517	NA	NA	2051	0.02798	cellular&nbsp;organisms>Bacteria>Terrabacteria&nbsp;group>Actinobacteria>Actinomycetia>Propionibacteriales>Nocardioidaceae>Nocardioides>unclassified&nbsp;Nocardioides
Streptomyces armeniacus	S	83291	2271	0.02796	NA	NA	1291	0.005812	2271	0.02796	NA	NA	1437	0.0196	cellular&nbsp;organisms>Bacteria>Terrabacteria&nbsp;group>Actinobacteria>Actinomycetia>Streptomycetales>Streptomycetaceae>Streptomyces
Pseudoalteromonas aliena	S	247523	6207	0.02794	NA	NA	6207	0.02794	NA	NA	NA	NA	NA	NA	cellular&nbsp;organisms>Bacteria>Proteobacteria>Gammaproteobacteria>Alteromonadales>Pseudoalteromonadaceae>Pseudoalteromonas
Curtobacterium flaccumfaciens	S	2035	2227	0.02791	NA	NA	NA	NA	2227	0.02742	NA	NA	2046	0.02791	cellular&nbsp;organisms>Bacteria>Terrabacteria&nbsp;group>Actinobacteria>Actinomycetia>Micrococcales>Microbacteriaceae>Curtobacterium
Streptomyces cyaneochromogenes	S	2496836	2046	0.02791	NA	NA	NA	NA	1811	0.0223	NA	NA	2046	0.02791	cellular&nbsp;organisms>Bacteria>Terrabacteria&nbsp;group>Actinobacteria>Actinomycetia>Streptomycetales>Streptomycetaceae>Streptomyces
Fusobacterium necrophorum	S	859	2467	0.0279	1445	0.009547	1068	0.004808	1411	0.01737	2467	0.0279	1621	0.02211	cellular&nbsp;organisms>Bacteria>Fusobacteria>Fusobacteriia>Fusobacteriales>Fusobacteriaceae>Fusobacterium
Cytobacillus oceanisediminis	S	665099	2463	0.02786	2069	0.01367	1282	0.005772	1438	0.01771	2463	0.02786	1626	0.02218	cellular&nbsp;organisms>Bacteria>Terrabacteria&nbsp;group>Firmicutes>Bacilli>Bacillales>Bacillaceae>Cytobacillus
Chryseobacterium sp. IHB B 17019	S	1721091	4215	0.02785	4215	0.02785	2932	0.0132	1210	0.0149	1748	0.01977	NA	NA	cellular&nbsp;organisms>Bacteria>FCB&nbsp;group>Bacteroidetes/Chlorobi&nbsp;group>Bacteroidetes>Flavobacteriia>Flavobacteriales>Weeksellaceae>Chryseobacterium&nbsp;group>Chryseobacterium>unclassified&nbsp;Chryseobacterium
Hymenobacter jejuensis	S	2502781	2261	0.02784	1437	0.009495	NA	NA	2261	0.02784	1434	0.01622	1571	0.02143	cellular&nbsp;organisms>Bacteria>FCB&nbsp;group>Bacteroidetes/Chlorobi&nbsp;group>Bacteroidetes>Cytophagia>Cytophagales>Hymenobacteraceae>Hymenobacter
Ralstonia insidiosa	S	190721	2092	0.02784	NA	NA	NA	NA	2092	0.02576	NA	NA	2041	0.02784	cellular&nbsp;organisms>Bacteria>Proteobacteria>Betaproteobacteria>Burkholderiales>Burkholderiaceae>Ralstonia
Arachidicoccus sp. B3-10	S	2545455	2524	0.02782	2033	0.01343	2524	0.01136	1500	0.01847	2135	0.02415	2039	0.02782	cellular&nbsp;organisms>Bacteria>FCB&nbsp;group>Bacteroidetes/Chlorobi&nbsp;group>Bacteroidetes>Chitinophagia>Chitinophagales>Chitinophagaceae>Arachidicoccus>unclassified&nbsp;Arachidicoccus
Nocardioides aromaticivorans	S	200618	2282	0.02774	NA	NA	2282	0.01027	2253	0.02774	NA	NA	2016	0.0275	cellular&nbsp;organisms>Bacteria>Terrabacteria&nbsp;group>Actinobacteria>Actinomycetia>Propionibacteriales>Nocardioidaceae>Nocardioides
Streptacidiphilus sp. PB12-B1b	S	2705012	2033	0.02773	NA	NA	NA	NA	1835	0.02259	NA	NA	2033	0.02773	cellular&nbsp;organisms>Bacteria>Terrabacteria&nbsp;group>Actinobacteria>Actinomycetia>Streptomycetales>Streptomycetaceae>Streptacidiphilus>unclassified&nbsp;Streptacidiphilus
Tenacibaculum sp. DSM 106434	S	2358479	5378	0.02772	4195	0.02772	5378	0.02421	NA	NA	NA	NA	NA	NA	cellular&nbsp;organisms>Bacteria>FCB&nbsp;group>Bacteroidetes/Chlorobi&nbsp;group>Bacteroidetes>Flavobacteriia>Flavobacteriales>Flavobacteriaceae>Tenacibaculum>unclassified&nbsp;Tenacibaculum
Microbacterium sp. NY27	S	2782169	2228	0.02772	NA	NA	2048	0.00922	2228	0.02743	NA	NA	2032	0.02772	cellular&nbsp;organisms>Bacteria>Terrabacteria&nbsp;group>Actinobacteria>Actinomycetia>Micrococcales>Microbacteriaceae>Microbacterium>unclassified&nbsp;Microbacterium
Francisella hispaniensis	S	622488	2450	0.02771	NA	NA	NA	NA	NA	NA	2450	0.02771	NA	NA	cellular&nbsp;organisms>Bacteria>Proteobacteria>Gammaproteobacteria>Thiotrichales>Francisellaceae>Francisella
Thermoanaerobacterium xylanolyticum	S	29329	2450	0.02771	NA	NA	NA	NA	1221	0.01503	2450	0.02771	NA	NA	cellular&nbsp;organisms>Bacteria>Terrabacteria&nbsp;group>Firmicutes>Clostridia>Thermoanaerobacterales>Thermoanaerobacterales&nbsp;Family&nbsp;III.&nbsp;Incertae&nbsp;Sedis>Thermoanaerobacterium
Caldicellulosiruptor owensensis	S	55205	2449	0.0277	NA	NA	NA	NA	NA	NA	2449	0.0277	NA	NA	cellular&nbsp;organisms>Bacteria>Terrabacteria&nbsp;group>Firmicutes>Clostridia>Thermoanaerobacterales>Thermoanaerobacterales&nbsp;Family&nbsp;III.&nbsp;Incertae&nbsp;Sedis>Caldicellulosiruptor
Micromonospora inositola	S	47865	2030	0.02769	NA	NA	NA	NA	1957	0.0241	NA	NA	2030	0.02769	cellular&nbsp;organisms>Bacteria>Terrabacteria&nbsp;group>Actinobacteria>Actinomycetia>Micromonosporales>Micromonosporaceae>Micromonospora
Kutzneria albida	S	43357	2249	0.02769	1875	0.01239	1792	0.008068	2249	0.02769	NA	NA	1940	0.02647	cellular&nbsp;organisms>Bacteria>Terrabacteria&nbsp;group>Actinobacteria>Actinomycetia>Pseudonocardiales>Pseudonocardiaceae>Kutzneria
Flavobacterium sp. LPB0248	S	2614441	6088	0.02764	4183	0.02764	6088	0.02741	1935	0.02382	NA	NA	NA	NA	cellular&nbsp;organisms>Bacteria>FCB&nbsp;group>Bacteroidetes/Chlorobi&nbsp;group>Bacteroidetes>Flavobacteriia>Flavobacteriales>Flavobacteriaceae>Flavobacterium>unclassified&nbsp;Flavobacterium
Rosistilla oblonga	S	2527990	2244	0.02763	NA	NA	1354	0.006096	2244	0.02763	NA	NA	1717	0.02342	cellular&nbsp;organisms>Bacteria>PVC&nbsp;group>Planctomycetes>Planctomycetia>Pirellulales>Pirellulaceae>Rosistilla
Ligilactobacillus murinus	S	1622	2442	0.02762	NA	NA	NA	NA	NA	NA	2442	0.02762	NA	NA	cellular&nbsp;organisms>Bacteria>Terrabacteria&nbsp;group>Firmicutes>Bacilli>Lactobacillales>Lactobacillaceae>Ligilactobacillus
Neorhizobium galegae	S	399	2121	0.02761	1195	0.007896	1310	0.005898	2121	0.02611	NA	NA	2024	0.02761	cellular&nbsp;organisms>Bacteria>Proteobacteria>Alphaproteobacteria>Hyphomicrobiales>Rhizobiaceae>Rhizobium/Agrobacterium&nbsp;group>Neorhizobium
Treponema socranskii	S	53419	2024	0.02761	1527	0.01009	NA	NA	1369	0.01686	1839	0.0208	2024	0.02761	cellular&nbsp;organisms>Bacteria>Spirochaetes>Spirochaetia>Spirochaetales>Spirochaetaceae>Treponema
Roseomonas sp. 1318	S	2768161	2085	0.02753	NA	NA	NA	NA	2085	0.02567	NA	NA	2018	0.02753	cellular&nbsp;organisms>Bacteria>Proteobacteria>Alphaproteobacteria>Rhodospirillales>Acetobacteraceae>Roseomonas>unclassified&nbsp;Roseomonas
Desulfovibrio fairfieldensis	S	44742	2234	0.02751	NA	NA	NA	NA	2234	0.02751	1488	0.01683	1926	0.02627	cellular&nbsp;organisms>Bacteria>Proteobacteria>delta/epsilon&nbsp;subdivisions>Deltaproteobacteria>Desulfovibrionales>Desulfovibrionaceae>Desulfovibrio
Pseudoalteromonas prydzensis	S	182141	2431	0.02749	NA	NA	NA	NA	NA	NA	2431	0.02749	NA	NA	cellular&nbsp;organisms>Bacteria>Proteobacteria>Gammaproteobacteria>Alteromonadales>Pseudoalteromonadaceae>Pseudoalteromonas
Streptomyces coeruleorubidus	S	116188	2015	0.02749	NA	NA	NA	NA	NA	NA	NA	NA	2015	0.02749	cellular&nbsp;organisms>Bacteria>Terrabacteria&nbsp;group>Actinobacteria>Actinomycetia>Streptomycetales>Streptomycetaceae>Streptomyces
Streptomyces sp. So13.3	S	2136173	2086	0.02749	NA	NA	1884	0.008482	2086	0.02568	NA	NA	2015	0.02749	cellular&nbsp;organisms>Bacteria>Terrabacteria&nbsp;group>Actinobacteria>Actinomycetia>Streptomycetales>Streptomycetaceae>Streptomyces>unclassified&nbsp;Streptomyces
Turicibacter sanguinis	S	154288	2429	0.02747	1348	0.008907	NA	NA	1413	0.0174	2429	0.02747	1228	0.01675	cellular&nbsp;organisms>Bacteria>Terrabacteria&nbsp;group>Firmicutes>Erysipelotrichia>Erysipelotrichales>Turicibacteraceae>Turicibacter
Sphingobacterium psychroaquaticum	S	561061	2424	0.02745	1954	0.01291	2424	0.01091	1788	0.02201	1209	0.01367	2012	0.02745	cellular&nbsp;organisms>Bacteria>FCB&nbsp;group>Bacteroidetes/Chlorobi&nbsp;group>Bacteroidetes>Sphingobacteriia>Sphingobacteriales>Sphingobacteriaceae>Sphingobacterium
Calothrix sp. NIES-2100	S	1954172	4320	0.02745	NA	NA	4320	0.01945	NA	NA	2427	0.02745	NA	NA	cellular&nbsp;organisms>Bacteria>Terrabacteria&nbsp;group>Cyanobacteria/Melainabacteria&nbsp;group>Cyanobacteria>Nostocales>Calotrichaceae>Calothrix>unclassified&nbsp;Calothrix
Campylobacter fetus	S	196	2426	0.02744	NA	NA	NA	NA	1649	0.0203	2426	0.02744	1958	0.02671	cellular&nbsp;organisms>Bacteria>Proteobacteria>delta/epsilon&nbsp;subdivisions>Epsilonproteobacteria>Campylobacterales>Campylobacteraceae>Campylobacter
Bradyrhizobium paxllaeri	S	190148	2010	0.02742	NA	NA	NA	NA	1304	0.01606	NA	NA	2010	0.02742	cellular&nbsp;organisms>Bacteria>Proteobacteria>Alphaproteobacteria>Hyphomicrobiales>Bradyrhizobiaceae>Bradyrhizobium
Pirellulimonas nuda	S	2528009	2176	0.02742	1128	0.007453	1373	0.006181	2176	0.02679	NA	NA	2010	0.02742	cellular&nbsp;organisms>Bacteria>PVC&nbsp;group>Planctomycetes>Planctomycetia>Pirellulales>Lacipirellulaceae>Pirellulimonas
Solitalea canadensis	S	995	2147	0.02737	1718	0.01135	1676	0.007545	2147	0.02644	1698	0.0192	2006	0.02737	cellular&nbsp;organisms>Bacteria>FCB&nbsp;group>Bacteroidetes/Chlorobi&nbsp;group>Bacteroidetes>Sphingobacteriia>Sphingobacteriales>Sphingobacteriaceae>Solitalea
Gluconobacter oxydans	S	442	2213	0.02735	NA	NA	NA	NA	2213	0.02725	NA	NA	2005	0.02735	cellular&nbsp;organisms>Bacteria>Proteobacteria>Alphaproteobacteria>Rhodospirillales>Acetobacteraceae>Gluconobacter
Filimonas lacunae	S	477680	2417	0.02734	1482	0.009792	NA	NA	1776	0.02187	2417	0.02734	1332	0.01817	cellular&nbsp;organisms>Bacteria>FCB&nbsp;group>Bacteroidetes/Chlorobi&nbsp;group>Bacteroidetes>Chitinophagia>Chitinophagales>Chitinophagaceae>Filimonas
Calothrix sp. NIES-2098	S	1954171	2413	0.02729	NA	NA	NA	NA	NA	NA	2413	0.02729	NA	NA	cellular&nbsp;organisms>Bacteria>Terrabacteria&nbsp;group>Cyanobacteria/Melainabacteria&nbsp;group>Cyanobacteria>Nostocales>Calotrichaceae>Calothrix>unclassified&nbsp;Calothrix
Aquimarina sp. AD10	S	1714849	2863	0.02728	2599	0.01717	2863	0.01289	1431	0.01762	2412	0.02728	1219	0.01663	cellular&nbsp;organisms>Bacteria>FCB&nbsp;group>Bacteroidetes/Chlorobi&nbsp;group>Bacteroidetes>Flavobacteriia>Flavobacteriales>Flavobacteriaceae>Aquimarina>unclassified&nbsp;Aquimarina
Flavobacterium magnum	S	2162713	2321	0.02728	2321	0.01534	1529	0.006884	2216	0.02728	NA	NA	1999	0.02727	cellular&nbsp;organisms>Bacteria>FCB&nbsp;group>Bacteroidetes/Chlorobi&nbsp;group>Bacteroidetes>Flavobacteriia>Flavobacteriales>Flavobacteriaceae>Flavobacterium
Burkholderia sp. DHOD12	S	2571746	1999	0.02727	NA	NA	NA	NA	1393	0.01715	NA	NA	1999	0.02727	cellular&nbsp;organisms>Bacteria>Proteobacteria>Betaproteobacteria>Burkholderiales>Burkholderiaceae>Burkholderia>unclassified&nbsp;Burkholderia
Rubrobacter xylanophilus	S	49319	2215	0.02727	1122	0.007413	1573	0.007082	2215	0.02727	NA	NA	1816	0.02477	cellular&nbsp;organisms>Bacteria>Terrabacteria&nbsp;group>Actinobacteria>Rubrobacteria>Rubrobacterales>Rubrobacteraceae>Rubrobacter
Streptomyces albireticuli	S	1940	1998	0.02726	NA	NA	NA	NA	1950	0.02401	NA	NA	1998	0.02726	cellular&nbsp;organisms>Bacteria>Terrabacteria&nbsp;group>Actinobacteria>Actinomycetia>Streptomycetales>Streptomycetaceae>Streptomyces
Methylobacterium terrae	S	2202827	2209	0.0272	NA	NA	NA	NA	2209	0.0272	NA	NA	1986	0.02709	cellular&nbsp;organisms>Bacteria>Proteobacteria>Alphaproteobacteria>Hyphomicrobiales>Methylobacteriaceae>Methylobacterium
Methylobacterium sp. 17Sr1-43	S	2202828	2149	0.02718	NA	NA	1842	0.008293	2149	0.02646	NA	NA	1992	0.02718	cellular&nbsp;organisms>Bacteria>Proteobacteria>Alphaproteobacteria>Hyphomicrobiales>Methylobacteriaceae>Methylobacterium>unclassified&nbsp;Methylobacterium
Amycolatopsis methanolica	S	1814	2140	0.02713	NA	NA	1793	0.008072	2140	0.02635	NA	NA	1989	0.02713	cellular&nbsp;organisms>Bacteria>Terrabacteria&nbsp;group>Actinobacteria>Actinomycetia>Pseudonocardiales>Pseudonocardiaceae>Amycolatopsis
Streptomyces sp. CB01881	S	2078691	2243	0.02712	NA	NA	2243	0.0101	1962	0.02416	NA	NA	1988	0.02712	cellular&nbsp;organisms>Bacteria>Terrabacteria&nbsp;group>Actinobacteria>Actinomycetia>Streptomycetales>Streptomycetaceae>Streptomyces>unclassified&nbsp;Streptomyces
Lentilactobacillus hilgardii	S	1588	2394	0.02708	NA	NA	NA	NA	NA	NA	2394	0.02708	NA	NA	cellular&nbsp;organisms>Bacteria>Terrabacteria&nbsp;group>Firmicutes>Bacilli>Lactobacillales>Lactobacillaceae>Lentilactobacillus
Streptomyces sp. SAT1	S	1849967	1984	0.02707	NA	NA	NA	NA	1777	0.02188	NA	NA	1984	0.02707	cellular&nbsp;organisms>Bacteria>Terrabacteria&nbsp;group>Actinobacteria>Actinomycetia>Streptomycetales>Streptomycetaceae>Streptomyces>unclassified&nbsp;Streptomyces
Olsenella sp. oral taxon 807	S	712411	1984	0.02707	NA	NA	1236	0.005564	1967	0.02422	NA	NA	1984	0.02707	cellular&nbsp;organisms>Bacteria>Terrabacteria&nbsp;group>Actinobacteria>Coriobacteriia>Coriobacteriales>Atopobiaceae>Olsenella>unclassified&nbsp;Olsenella
Metabacillus sp. KUDC1714	S	2745198	2465	0.02706	2465	0.01629	1904	0.008572	2010	0.02475	2393	0.02706	1763	0.02405	cellular&nbsp;organisms>Bacteria>Terrabacteria&nbsp;group>Firmicutes>Bacilli>Bacillales>Bacillaceae>Metabacillus>unclassified&nbsp;Metabacillus
Flavivirga eckloniae	S	1803846	2857	0.02705	2857	0.01888	2783	0.01253	1240	0.01527	2392	0.02705	NA	NA	cellular&nbsp;organisms>Bacteria>FCB&nbsp;group>Bacteroidetes/Chlorobi&nbsp;group>Bacteroidetes>Flavobacteriia>Flavobacteriales>Flavobacteriaceae>Flavivirga
Amycolatopsis albispora	S	1804986	2144	0.02704	NA	NA	1706	0.00768	2144	0.0264	NA	NA	1982	0.02704	cellular&nbsp;organisms>Bacteria>Terrabacteria&nbsp;group>Actinobacteria>Actinomycetia>Pseudonocardiales>Pseudonocardiaceae>Amycolatopsis
Usitatibacter rugosus	S	2732067	2084	0.02693	1423	0.009402	1608	0.007239	2084	0.02566	NA	NA	1974	0.02693	cellular&nbsp;organisms>Bacteria>Proteobacteria>Betaproteobacteria>Nitrosomonadales>Usitatibacteraceae>Usitatibacter
Pseudoxanthomonas suwonensis	S	314722	2136	0.02692	NA	NA	1656	0.007455	2136	0.0263	NA	NA	1973	0.02692	cellular&nbsp;organisms>Bacteria>Proteobacteria>Gammaproteobacteria>Xanthomonadales>Xanthomonadaceae>Pseudoxanthomonas
Lutibacter profundi	S	1622118	4454	0.0269	4071	0.0269	4454	0.02005	1215	0.01496	1315	0.01487	NA	NA	cellular&nbsp;organisms>Bacteria>FCB&nbsp;group>Bacteroidetes/Chlorobi&nbsp;group>Bacteroidetes>Flavobacteriia>Flavobacteriales>Flavobacteriaceae>Lutibacter
Nocardia farcinica	S	37329	1966	0.02682	NA	NA	NA	NA	1885	0.02321	NA	NA	1966	0.02682	cellular&nbsp;organisms>Bacteria>Terrabacteria&nbsp;group>Actinobacteria>Actinomycetia>Corynebacteriales>Nocardiaceae>Nocardia
Kribbella flavida	S	182640	1966	0.02682	NA	NA	1328	0.005979	1550	0.01908	NA	NA	1966	0.02682	cellular&nbsp;organisms>Bacteria>Terrabacteria&nbsp;group>Actinobacteria>Actinomycetia>Propionibacteriales>Kribbellaceae>Kribbella
Cyclobacterium marinum	S	104	2176	0.02679	1847	0.0122	1225	0.005515	2176	0.02679	1938	0.02192	1784	0.02434	cellular&nbsp;organisms>Bacteria>FCB&nbsp;group>Bacteroidetes/Chlorobi&nbsp;group>Bacteroidetes>Cytophagia>Cytophagales>Cyclobacteriaceae>Cyclobacterium
Actinoplanes friuliensis	S	196914	2692	0.02679	2692	0.01779	1734	0.007806	2176	0.02679	NA	NA	1776	0.02423	cellular&nbsp;organisms>Bacteria>Terrabacteria&nbsp;group>Actinobacteria>Actinomycetia>Micromonosporales>Micromonosporaceae>Actinoplanes
Ndongobacter massiliensis	S	1871025	2176	0.02679	NA	NA	NA	NA	2176	0.02679	NA	NA	1949	0.02659	cellular&nbsp;organisms>Bacteria>Terrabacteria&nbsp;group>Firmicutes>Firmicutes&nbsp;sensu&nbsp;stricto&nbsp;incertae&nbsp;sedis>Ndongobacter
Elizabethkingia miricola	S	172045	4050	0.02676	4050	0.02676	3001	0.01351	NA	NA	NA	NA	NA	NA	cellular&nbsp;organisms>Bacteria>FCB&nbsp;group>Bacteroidetes/Chlorobi&nbsp;group>Bacteroidetes>Flavobacteriia>Flavobacteriales>Weeksellaceae>Elizabethkingia
Streptomyces sp. C8S0	S	2585716	2229	0.02675	NA	NA	2229	0.01003	1825	0.02247	NA	NA	1961	0.02675	cellular&nbsp;organisms>Bacteria>Terrabacteria&nbsp;group>Actinobacteria>Actinomycetia>Streptomycetales>Streptomycetaceae>Streptomyces>unclassified&nbsp;Streptomyces
Microvirga ossetica	S	1882682	1960	0.02674	NA	NA	1235	0.00556	1718	0.02115	NA	NA	1960	0.02674	cellular&nbsp;organisms>Bacteria>Proteobacteria>Alphaproteobacteria>Hyphomicrobiales>Methylobacteriaceae>Microvirga
Chromobacterium sp. ATCC 53434	S	2059672	1958	0.02671	NA	NA	NA	NA	1635	0.02013	NA	NA	1958	0.02671	cellular&nbsp;organisms>Bacteria>Proteobacteria>Betaproteobacteria>Neisseriales>Chromobacteriaceae>Chromobacterium&nbsp;group>Chromobacterium>unclassified&nbsp;Chromobacterium
Photobacterium damselae	S	38293	2169	0.02671	1719	0.01136	1368	0.006159	2169	0.02671	2022	0.02287	1808	0.02467	cellular&nbsp;organisms>Bacteria>Proteobacteria>Gammaproteobacteria>Vibrionales>Vibrionaceae>Photobacterium
Mycobacterium gordonae	S	1778	3584	0.02671	NA	NA	3584	0.01614	1669	0.02055	NA	NA	1958	0.02671	cellular&nbsp;organisms>Bacteria>Terrabacteria&nbsp;group>Actinobacteria>Actinomycetia>Corynebacteriales>Mycobacteriaceae>Mycobacterium
Streptomyces vinaceus	S	1960	2712	0.02671	NA	NA	2712	0.01221	NA	NA	NA	NA	1958	0.02671	cellular&nbsp;organisms>Bacteria>Terrabacteria&nbsp;group>Actinobacteria>Actinomycetia>Streptomycetales>Streptomycetaceae>Streptomyces
Winogradskyella helgolandensis	S	2697010	4097	0.02669	4040	0.02669	4097	0.01844	NA	NA	NA	NA	NA	NA	cellular&nbsp;organisms>Bacteria>FCB&nbsp;group>Bacteroidetes/Chlorobi&nbsp;group>Bacteroidetes>Flavobacteriia>Flavobacteriales>Flavobacteriaceae>Winogradskyella
Amycolatopsis sp. AA4	S	1896961	1956	0.02668	NA	NA	1637	0.00737	1905	0.02346	NA	NA	1956	0.02668	cellular&nbsp;organisms>Bacteria>Terrabacteria&nbsp;group>Actinobacteria>Actinomycetia>Pseudonocardiales>Pseudonocardiaceae>Amycolatopsis>unclassified&nbsp;Amycolatopsis
Streptomyces cadmiisoli	S	2184053	1956	0.02668	NA	NA	NA	NA	1537	0.01892	NA	NA	1956	0.02668	cellular&nbsp;organisms>Bacteria>Terrabacteria&nbsp;group>Actinobacteria>Actinomycetia>Streptomycetales>Streptomycetaceae>Streptomyces
Sulfitobacter sp. AM1-D1	S	1917485	2166	0.02667	NA	NA	NA	NA	2166	0.02667	NA	NA	NA	NA	cellular&nbsp;organisms>Bacteria>Proteobacteria>Alphaproteobacteria>Rhodobacterales>Rhodobacteraceae>Sulfitobacter>unclassified&nbsp;Sulfitobacter
Alloactinosynnema sp. L-07	S	1653480	2163	0.02663	NA	NA	1726	0.00777	2163	0.02663	NA	NA	1926	0.02627	cellular&nbsp;organisms>Bacteria>Terrabacteria&nbsp;group>Actinobacteria>Actinomycetia>Pseudonocardiales>Pseudonocardiaceae>Alloactinosynnema>unclassified&nbsp;Alloactinosynnema
Alicyclobacillus ferrooxydans	S	471514	2136	0.0266	1156	0.007638	1035	0.00466	2136	0.0263	1552	0.01755	1950	0.0266	cellular&nbsp;organisms>Bacteria>Terrabacteria&nbsp;group>Firmicutes>Bacilli>Bacillales>Alicyclobacillaceae>Alicyclobacillus
Flavobacterium sp. M31R6	S	2739062	5903	0.02658	4001	0.02644	5903	0.02658	1280	0.01576	2301	0.02602	NA	NA	cellular&nbsp;organisms>Bacteria>FCB&nbsp;group>Bacteroidetes/Chlorobi&nbsp;group>Bacteroidetes>Flavobacteriia>Flavobacteriales>Flavobacteriaceae>Flavobacterium>unclassified&nbsp;Flavobacterium
Kaistia sp. 32K	S	2795690	1993	0.02658	NA	NA	1852	0.008338	1993	0.02454	NA	NA	1948	0.02658	cellular&nbsp;organisms>Bacteria>Proteobacteria>Alphaproteobacteria>Hyphomicrobiales>Rhizobiaceae>Kaistia>unclassified&nbsp;Kaistia
Vibrio coralliilyticus	S	190893	2349	0.02657	NA	NA	1429	0.006433	NA	NA	2349	0.02657	NA	NA	cellular&nbsp;organisms>Bacteria>Proteobacteria>Gammaproteobacteria>Vibrionales>Vibrionaceae>Vibrio
Pontibacter pudoricolor	S	2694930	2157	0.02656	1917	0.01267	1223	0.005506	2157	0.02656	1432	0.0162	1747	0.02383	cellular&nbsp;organisms>Bacteria>FCB&nbsp;group>Bacteroidetes/Chlorobi&nbsp;group>Bacteroidetes>Cytophagia>Cytophagales>Hymenobacteraceae>Pontibacter
Polaribacter sp. SA4-10	S	754397	4459	0.02656	4020	0.02656	4459	0.02007	1446	0.0178	2100	0.02375	NA	NA	cellular&nbsp;organisms>Bacteria>FCB&nbsp;group>Bacteroidetes/Chlorobi&nbsp;group>Bacteroidetes>Flavobacteriia>Flavobacteriales>Flavobacteriaceae>Polaribacter>unclassified&nbsp;Polaribacter
Pontibacter korlensis	S	400092	2348	0.02655	1832	0.0121	NA	NA	1983	0.02442	2348	0.02655	1498	0.02044	cellular&nbsp;organisms>Bacteria>FCB&nbsp;group>Bacteroidetes/Chlorobi&nbsp;group>Bacteroidetes>Cytophagia>Cytophagales>Hymenobacteraceae>Pontibacter
Halomonas venusta	S	44935	5891	0.02652	NA	NA	5891	0.02652	NA	NA	NA	NA	NA	NA	cellular&nbsp;organisms>Bacteria>Proteobacteria>Gammaproteobacteria>Oceanospirillales>Halomonadaceae>Halomonas
Chryseobacterium sp. StRB126	S	878220	4011	0.0265	4011	0.0265	2717	0.01223	1364	0.01679	1664	0.01882	NA	NA	cellular&nbsp;organisms>Bacteria>FCB&nbsp;group>Bacteroidetes/Chlorobi&nbsp;group>Bacteroidetes>Flavobacteriia>Flavobacteriales>Weeksellaceae>Chryseobacterium&nbsp;group>Chryseobacterium>unclassified&nbsp;Chryseobacterium
Bacillus weihaiensis	S	1547283	2343	0.0265	2009	0.01327	1423	0.006406	NA	NA	2343	0.0265	1230	0.01678	cellular&nbsp;organisms>Bacteria>Terrabacteria&nbsp;group>Firmicutes>Bacilli>Bacillales>Bacillaceae>Bacillus
Streptomyces cyanogenus	S	80860	1942	0.02649	NA	NA	NA	NA	NA	NA	NA	NA	1942	0.02649	cellular&nbsp;organisms>Bacteria>Terrabacteria&nbsp;group>Actinobacteria>Actinomycetia>Streptomycetales>Streptomycetaceae>Streptomyces
Streptomyces sp. NA02950	S	2742137	1977	0.02649	NA	NA	NA	NA	1977	0.02434	NA	NA	1942	0.02649	cellular&nbsp;organisms>Bacteria>Terrabacteria&nbsp;group>Actinobacteria>Actinomycetia>Streptomycetales>Streptomycetaceae>Streptomyces>unclassified&nbsp;Streptomyces
Aquiflexum balticum	S	280473	2150	0.02647	1921	0.01269	1172	0.005276	2150	0.02647	1424	0.0161	1702	0.02322	cellular&nbsp;organisms>Bacteria>FCB&nbsp;group>Bacteroidetes/Chlorobi&nbsp;group>Bacteroidetes>Cytophagia>Cytophagales>Cyclobacteriaceae>Aquiflexum
Mucilaginibacter sp. F39-2	S	2728022	2339	0.02645	1293	0.008543	NA	NA	1626	0.02002	2339	0.02645	1188	0.01621	cellular&nbsp;organisms>Bacteria>FCB&nbsp;group>Bacteroidetes/Chlorobi&nbsp;group>Bacteroidetes>Sphingobacteriia>Sphingobacteriales>Sphingobacteriaceae>Mucilaginibacter>unclassified&nbsp;Mucilaginibacter
Casimicrobium huifangae	S	2591109	1939	0.02645	NA	NA	NA	NA	NA	NA	NA	NA	1939	0.02645	cellular&nbsp;organisms>Bacteria>Proteobacteria>Betaproteobacteria>Betaproteobacteria&nbsp;incertae&nbsp;sedis>Casimicrobiaceae>Casimicrobium
Myxococcus hansupus	S	1297742	1938	0.02644	NA	NA	NA	NA	1703	0.02097	NA	NA	1938	0.02644	cellular&nbsp;organisms>Bacteria>Proteobacteria>delta/epsilon&nbsp;subdivisions>Deltaproteobacteria>Myxococcales>Cystobacterineae>Myxococcaceae>Myxococcus
Streptomyces subrutilus	S	36818	1938	0.02644	NA	NA	NA	NA	1594	0.01963	NA	NA	1938	0.02644	cellular&nbsp;organisms>Bacteria>Terrabacteria&nbsp;group>Actinobacteria>Actinomycetia>Streptomycetales>Streptomycetaceae>Streptomyces
Streptomyces glaucescens	S	1907	1937	0.02643	NA	NA	NA	NA	1878	0.02312	NA	NA	1937	0.02643	cellular&nbsp;organisms>Bacteria>Terrabacteria&nbsp;group>Actinobacteria>Actinomycetia>Streptomycetales>Streptomycetaceae>Streptomyces
Micromonospora echinospora	S	1877	1936	0.02641	NA	NA	NA	NA	1630	0.02007	NA	NA	1936	0.02641	cellular&nbsp;organisms>Bacteria>Terrabacteria&nbsp;group>Actinobacteria>Actinomycetia>Micromonosporales>Micromonosporaceae>Micromonospora
Paenibacillus sp. FSL R7-0331	S	1536773	1936	0.02641	NA	NA	1228	0.005528	1899	0.02338	1639	0.01854	1936	0.02641	cellular&nbsp;organisms>Bacteria>Terrabacteria&nbsp;group>Firmicutes>Bacilli>Bacillales>Paenibacillaceae>Paenibacillus>unclassified&nbsp;Paenibacillus
Thauera humireducens	S	1134435	1935	0.0264	NA	NA	NA	NA	NA	NA	NA	NA	1935	0.0264	cellular&nbsp;organisms>Bacteria>Proteobacteria>Betaproteobacteria>Rhodocyclales>Zoogloeaceae>Thauera
Spirosoma sp. KCTC 42546	S	2520506	2141	0.02636	1564	0.01033	NA	NA	2141	0.02636	1576	0.01782	1926	0.02627	cellular&nbsp;organisms>Bacteria>FCB&nbsp;group>Bacteroidetes/Chlorobi&nbsp;group>Bacteroidetes>Cytophagia>Cytophagales>Cytophagaceae>Spirosoma>unclassified&nbsp;Spirosoma
Thauera sp. K11	S	2005884	2121	0.02632	NA	NA	NA	NA	2121	0.02611	NA	NA	1929	0.02632	cellular&nbsp;organisms>Bacteria>Proteobacteria>Betaproteobacteria>Rhodocyclales>Zoogloeaceae>Thauera>unclassified&nbsp;Thauera
Neobacillus cucumis	S	1740721	2326	0.02631	2028	0.0134	1358	0.006114	1427	0.01757	2326	0.02631	1472	0.02008	cellular&nbsp;organisms>Bacteria>Terrabacteria&nbsp;group>Firmicutes>Bacilli>Bacillales>Bacillaceae>Neobacillus
Streptococcus sobrinus	S	1310	2326	0.02631	NA	NA	NA	NA	NA	NA	2326	0.02631	NA	NA	cellular&nbsp;organisms>Bacteria>Terrabacteria&nbsp;group>Firmicutes>Bacilli>Lactobacillales>Streptococcaceae>Streptococcus
Oceanobacillus zhaokaii	S	2052660	2339	0.02628	2339	0.01545	2163	0.009738	1154	0.01421	2324	0.02628	1134	0.01547	cellular&nbsp;organisms>Bacteria>Terrabacteria&nbsp;group>Firmicutes>Bacilli>Bacillales>Bacillaceae>Oceanobacillus
Kaistella jeonii	S	266749	3976	0.02627	3976	0.02627	3153	0.01419	1349	0.01661	NA	NA	1151	0.0157	cellular&nbsp;organisms>Bacteria>FCB&nbsp;group>Bacteroidetes/Chlorobi&nbsp;group>Bacteroidetes>Flavobacteriia>Flavobacteriales>Weeksellaceae>Chryseobacterium&nbsp;group>Kaistella
Paenibacillus crassostreae	S	1763538	2323	0.02627	1452	0.009594	2186	0.009841	1351	0.01663	2323	0.02627	1230	0.01678	cellular&nbsp;organisms>Bacteria>Terrabacteria&nbsp;group>Firmicutes>Bacilli>Bacillales>Paenibacillaceae>Paenibacillus
Schaalia odontolytica	S	1660	2063	0.02625	NA	NA	NA	NA	2063	0.0254	NA	NA	1924	0.02625	cellular&nbsp;organisms>Bacteria>Terrabacteria&nbsp;group>Actinobacteria>Actinomycetia>Actinomycetales>Actinomycetaceae>Schaalia
Antarcticibacterium flavum	S	2058175	2133	0.02623	2133	0.01409	1641	0.007388	1805	0.02222	NA	NA	1923	0.02623	cellular&nbsp;organisms>Bacteria>FCB&nbsp;group>Bacteroidetes/Chlorobi&nbsp;group>Bacteroidetes>Flavobacteriia>Flavobacteriales>Flavobacteriaceae>Antarcticibacterium
Hymenobacter russus	S	2724192	1920	0.02619	1362	0.008999	NA	NA	1690	0.02081	NA	NA	1920	0.02619	cellular&nbsp;organisms>Bacteria>FCB&nbsp;group>Bacteroidetes/Chlorobi&nbsp;group>Bacteroidetes>Cytophagia>Cytophagales>Hymenobacteraceae>Hymenobacter
Chlorobium phaeobacteroides	S	1096	2316	0.02619	1539	0.01017	NA	NA	2054	0.02529	2316	0.02619	1898	0.02589	cellular&nbsp;organisms>Bacteria>FCB&nbsp;group>Bacteroidetes/Chlorobi&nbsp;group>Chlorobi>Chlorobia>Chlorobiales>Chlorobiaceae>Chlorobium/Pelodictyon&nbsp;group>Chlorobium
Rhodococcus fascians	S	1828	2127	0.02619	NA	NA	1658	0.007464	2127	0.02619	NA	NA	1750	0.02387	cellular&nbsp;organisms>Bacteria>Terrabacteria&nbsp;group>Actinobacteria>Actinomycetia>Corynebacteriales>Nocardiaceae>Rhodococcus
Flavobacterium sp. Sr18	S	935222	5815	0.02618	3897	0.02575	5815	0.02618	1204	0.01482	NA	NA	NA	NA	cellular&nbsp;organisms>Bacteria>FCB&nbsp;group>Bacteroidetes/Chlorobi&nbsp;group>Bacteroidetes>Flavobacteriia>Flavobacteriales>Flavobacteriaceae>Flavobacterium>unclassified&nbsp;Flavobacterium
Streptomyces sp. QMT-12	S	2717324	1949	0.02614	NA	NA	1949	0.008774	1849	0.02277	NA	NA	1916	0.02614	cellular&nbsp;organisms>Bacteria>Terrabacteria&nbsp;group>Actinobacteria>Actinomycetia>Streptomycetales>Streptomycetaceae>Streptomyces>unclassified&nbsp;Streptomyces
Mucilaginibacter ginsenosidivorax	S	862126	2120	0.0261	1298	0.008576	NA	NA	2120	0.0261	1840	0.02081	1462	0.01994	cellular&nbsp;organisms>Bacteria>FCB&nbsp;group>Bacteroidetes/Chlorobi&nbsp;group>Bacteroidetes>Sphingobacteriia>Sphingobacteriales>Sphingobacteriaceae>Mucilaginibacter
Rhodanobacter glycinis	S	582702	1912	0.02608	NA	NA	NA	NA	NA	NA	NA	NA	1912	0.02608	cellular&nbsp;organisms>Bacteria>Proteobacteria>Gammaproteobacteria>Xanthomonadales>Rhodanobacteraceae>Rhodanobacter
Streptomyces lincolnensis	S	1915	1912	0.02608	NA	NA	NA	NA	1817	0.02237	NA	NA	1912	0.02608	cellular&nbsp;organisms>Bacteria>Terrabacteria&nbsp;group>Actinobacteria>Actinomycetia>Streptomycetales>Streptomycetaceae>Streptomyces
Turneriella parva	S	29510	2117	0.02607	1076	0.007109	1595	0.007181	2117	0.02607	NA	NA	1819	0.02482	cellular&nbsp;organisms>Bacteria>Spirochaetes>Spirochaetia>Leptospirales>Leptospiraceae>Turneriella
Massilia lutea	S	321985	2115	0.02604	NA	NA	NA	NA	2115	0.02604	NA	NA	1667	0.02274	cellular&nbsp;organisms>Bacteria>Proteobacteria>Betaproteobacteria>Burkholderiales>Oxalobacteraceae>Massilia
Hyphobacterium sp. CCMP332	S	2749086	2114	0.02603	1285	0.00849	NA	NA	2114	0.02603	2002	0.02264	1585	0.02162	cellular&nbsp;organisms>Bacteria>Proteobacteria>Alphaproteobacteria>Maricaulales>Maricaulaceae>Hyphobacterium>unclassified&nbsp;Hyphobacterium
Azoarcus sp. KH32C	S	748247	1908	0.02603	NA	NA	NA	NA	1259	0.0155	NA	NA	1908	0.02603	cellular&nbsp;organisms>Bacteria>Proteobacteria>Betaproteobacteria>Rhodocyclales>Zoogloeaceae>Azoarcus>unclassified&nbsp;Azoarcus
Frankia alni	S	1859	1906	0.026	NA	NA	NA	NA	1808	0.02226	NA	NA	1906	0.026	cellular&nbsp;organisms>Bacteria>Terrabacteria&nbsp;group>Actinobacteria>Actinomycetia>Frankiales>Frankiaceae>Frankia
Paenibacillus psychroresistens	S	1778678	2297	0.02598	1275	0.008424	NA	NA	1868	0.023	2297	0.02598	1584	0.02161	cellular&nbsp;organisms>Bacteria>Terrabacteria&nbsp;group>Firmicutes>Bacilli>Bacillales>Paenibacillaceae>Paenibacillus
Desulfotomaculum nigrificans	S	1565	1904	0.02597	NA	NA	NA	NA	1382	0.01702	1621	0.01833	1904	0.02597	cellular&nbsp;organisms>Bacteria>Terrabacteria&nbsp;group>Firmicutes>Clostridia>Eubacteriales>Peptococcaceae>Desulfotomaculum
Actinobacillus sp. GY-402	S	2774188	2295	0.02596	NA	NA	NA	NA	NA	NA	2295	0.02596	NA	NA	cellular&nbsp;organisms>Bacteria>Proteobacteria>Gammaproteobacteria>Pasteurellales>Pasteurellaceae>Actinobacillus>unclassified&nbsp;Actinobacillus
Treponema medium	S	58231	1901	0.02593	1149	0.007592	NA	NA	1532	0.01886	1621	0.01833	1901	0.02593	cellular&nbsp;organisms>Bacteria>Spirochaetes>Spirochaetia>Spirochaetales>Spirochaetaceae>Treponema
Desulfarculus baarsii	S	453230	2104	0.02591	NA	NA	NA	NA	2104	0.02591	NA	NA	1661	0.02266	cellular&nbsp;organisms>Bacteria>Proteobacteria>delta/epsilon&nbsp;subdivisions>Deltaproteobacteria>Desulfarculales>Desulfarculaceae>Desulfarculus
Psychrobacter arcticus	S	334543	5061	0.02591	3922	0.02591	5061	0.02278	NA	NA	NA	NA	NA	NA	cellular&nbsp;organisms>Bacteria>Proteobacteria>Gammaproteobacteria>Pseudomonadales>Moraxellaceae>Psychrobacter
Streptomyces phaeolivaceus	S	2653200	1899	0.02591	NA	NA	NA	NA	1873	0.02306	NA	NA	1899	0.02591	cellular&nbsp;organisms>Bacteria>Terrabacteria&nbsp;group>Actinobacteria>Actinomycetia>Streptomycetales>Streptomycetaceae>Streptomyces
Pedobacter sp. JBR3-12	S	2789740	2289	0.02589	1222	0.008074	NA	NA	2022	0.0249	2289	0.02589	1625	0.02217	cellular&nbsp;organisms>Bacteria>FCB&nbsp;group>Bacteroidetes/Chlorobi&nbsp;group>Bacteroidetes>Sphingobacteriia>Sphingobacteriales>Sphingobacteriaceae>Pedobacter>unclassified&nbsp;Pedobacter
Streptomyces sp. YIM 121038	S	2136401	1912	0.02589	NA	NA	NA	NA	1912	0.02354	NA	NA	1898	0.02589	cellular&nbsp;organisms>Bacteria>Terrabacteria&nbsp;group>Actinobacteria>Actinomycetia>Streptomycetales>Streptomycetaceae>Streptomyces>unclassified&nbsp;Streptomyces
Deinococcus gobiensis	S	502394	3330	0.02584	NA	NA	3330	0.01499	1996	0.02458	NA	NA	1894	0.02584	cellular&nbsp;organisms>Bacteria>Terrabacteria&nbsp;group>Deinococcus&#x2011;Thermus>Deinococci>Deinococcales>Deinococcaceae>Deinococcus
Peptoniphilus ivorii	S	54006	1894	0.02584	NA	NA	NA	NA	1471	0.01811	NA	NA	1894	0.02584	cellular&nbsp;organisms>Bacteria>Terrabacteria&nbsp;group>Firmicutes>Tissierellia>Tissierellales>Peptoniphilaceae>Peptoniphilus
Desulfosarcina alkanivorans	S	571177	2097	0.02582	1867	0.01234	NA	NA	2097	0.02582	NA	NA	1815	0.02476	cellular&nbsp;organisms>Bacteria>Proteobacteria>delta/epsilon&nbsp;subdivisions>Deltaproteobacteria>Desulfobacterales>Desulfobacteraceae>Desulfosarcina
Streptomyces aquilus	S	2548456	1892	0.02581	NA	NA	NA	NA	1853	0.02282	NA	NA	1892	0.02581	cellular&nbsp;organisms>Bacteria>Terrabacteria&nbsp;group>Actinobacteria>Actinomycetia>Streptomycetales>Streptomycetaceae>Streptomyces
Cupriavidus campinensis	S	151783	1891	0.0258	NA	NA	NA	NA	1803	0.0222	NA	NA	1891	0.0258	cellular&nbsp;organisms>Bacteria>Proteobacteria>Betaproteobacteria>Burkholderiales>Burkholderiaceae>Cupriavidus
Streptomyces sp. P3	S	2135430	1975	0.0258	NA	NA	NA	NA	1975	0.02432	NA	NA	1891	0.0258	cellular&nbsp;organisms>Bacteria>Terrabacteria&nbsp;group>Actinobacteria>Actinomycetia>Streptomycetales>Streptomycetaceae>Streptomyces>unclassified&nbsp;Streptomyces
Algibacter alginicilyticus	S	1736674	3902	0.02578	3902	0.02578	3479	0.01566	1395	0.01718	1134	0.01283	NA	NA	cellular&nbsp;organisms>Bacteria>FCB&nbsp;group>Bacteroidetes/Chlorobi&nbsp;group>Bacteroidetes>Flavobacteriia>Flavobacteriales>Flavobacteriaceae>Algibacter
Desulfovibrio sp. IOR2	S	2583823	1960	0.02578	NA	NA	NA	NA	1960	0.02413	NA	NA	1890	0.02578	cellular&nbsp;organisms>Bacteria>Proteobacteria>delta/epsilon&nbsp;subdivisions>Deltaproteobacteria>Desulfovibrionales>Desulfovibrionaceae>Desulfovibrio>unclassified&nbsp;Desulfovibrio
Janibacter melonis	S	262209	2090	0.02573	NA	NA	NA	NA	2090	0.02573	NA	NA	NA	NA	cellular&nbsp;organisms>Bacteria>Terrabacteria&nbsp;group>Actinobacteria>Actinomycetia>Micrococcales>Intrasporangiaceae>Janibacter
Myxococcus stipitatus	S	83455	2084	0.02566	NA	NA	NA	NA	2084	0.02566	NA	NA	1480	0.02019	cellular&nbsp;organisms>Bacteria>Proteobacteria>delta/epsilon&nbsp;subdivisions>Deltaproteobacteria>Myxococcales>Cystobacterineae>Myxococcaceae>Myxococcus
Oceanispirochaeta crateris	S	2518645	2268	0.02565	1186	0.007836	NA	NA	1485	0.01828	2268	0.02565	1580	0.02155	cellular&nbsp;organisms>Bacteria>Spirochaetes>Spirochaetia>Spirochaetales>Spirochaetaceae>Oceanispirochaeta
Anoxybacillus flavithermus	S	33934	2575	0.02562	2575	0.01701	NA	NA	NA	NA	2265	0.02562	NA	NA	cellular&nbsp;organisms>Bacteria>Terrabacteria&nbsp;group>Firmicutes>Bacilli>Bacillales>Bacillaceae>Anoxybacillus
Peribacillus muralis	S	264697	2265	0.02562	1638	0.01082	NA	NA	NA	NA	2265	0.02562	NA	NA	cellular&nbsp;organisms>Bacteria>Terrabacteria&nbsp;group>Firmicutes>Bacilli>Bacillales>Bacillaceae>Peribacillus
Kinneretia sp. DAIF2	S	2714952	1877	0.02561	NA	NA	1271	0.005722	1872	0.02305	NA	NA	1877	0.02561	cellular&nbsp;organisms>Bacteria>Proteobacteria>Betaproteobacteria>Burkholderiales>Comamonadaceae>Kinneretia>unclassified&nbsp;Kinneretia
Microbacterium oleivorans	S	273677	2080	0.02561	NA	NA	1762	0.007933	2080	0.02561	NA	NA	1792	0.02445	cellular&nbsp;organisms>Bacteria>Terrabacteria&nbsp;group>Actinobacteria>Actinomycetia>Micrococcales>Microbacteriaceae>Microbacterium
Leptotrichia sp. oral taxon 498	S	712368	2264	0.0256	NA	NA	NA	NA	NA	NA	2264	0.0256	NA	NA	cellular&nbsp;organisms>Bacteria>Fusobacteria>Fusobacteriia>Fusobacteriales>Leptotrichiaceae>Leptotrichia>unclassified&nbsp;Leptotrichia
Streptomyces peucetius	S	1950	1875	0.02558	NA	NA	NA	NA	1459	0.01796	NA	NA	1875	0.02558	cellular&nbsp;organisms>Bacteria>Terrabacteria&nbsp;group>Actinobacteria>Actinomycetia>Streptomycetales>Streptomycetaceae>Streptomyces
Hymenobacter sp. BRD128	S	2675878	2077	0.02557	1569	0.01037	NA	NA	2077	0.02557	1591	0.01799	1731	0.02361	cellular&nbsp;organisms>Bacteria>FCB&nbsp;group>Bacteroidetes/Chlorobi&nbsp;group>Bacteroidetes>Cytophagia>Cytophagales>Hymenobacteraceae>Hymenobacter>unclassified&nbsp;Hymenobacter
Mycolicibacterium chubuense	S	1800	1874	0.02557	NA	NA	NA	NA	NA	NA	NA	NA	1874	0.02557	cellular&nbsp;organisms>Bacteria>Terrabacteria&nbsp;group>Actinobacteria>Actinomycetia>Corynebacteriales>Mycobacteriaceae>Mycolicibacterium
Mitsuaria sp. 7	S	1658665	2075	0.02555	NA	NA	1367	0.006154	2075	0.02555	NA	NA	1723	0.02351	cellular&nbsp;organisms>Bacteria>Proteobacteria>Betaproteobacteria>Burkholderiales>Burkholderiales&nbsp;genera&nbsp;incertae&nbsp;sedis>Mitsuaria>unclassified&nbsp;Mitsuaria
Pseudomonas protegens	S	380021	4147	0.02555	2627	0.01736	4147	0.01867	2075	0.02555	NA	NA	1688	0.02303	cellular&nbsp;organisms>Bacteria>Proteobacteria>Gammaproteobacteria>Pseudomonadales>Pseudomonadaceae>Pseudomonas>Pseudomonas&nbsp;fluorescens&nbsp;group
Allokutzneria albata	S	211114	2073	0.02555	NA	NA	1902	0.008563	2073	0.02552	NA	NA	1873	0.02555	cellular&nbsp;organisms>Bacteria>Terrabacteria&nbsp;group>Actinobacteria>Actinomycetia>Pseudonocardiales>Pseudonocardiaceae>Allokutzneria
Hymenobacter sp. S2-20-2	S	2761579	2073	0.02552	1427	0.009429	NA	NA	2073	0.02552	NA	NA	1733	0.02364	cellular&nbsp;organisms>Bacteria>FCB&nbsp;group>Bacteroidetes/Chlorobi&nbsp;group>Bacteroidetes>Cytophagia>Cytophagales>Hymenobacteraceae>Hymenobacter>unclassified&nbsp;Hymenobacter
Sphingomonas sp. AAP5	S	1523415	1870	0.02551	NA	NA	NA	NA	1472	0.01812	NA	NA	1870	0.02551	cellular&nbsp;organisms>Bacteria>Proteobacteria>Alphaproteobacteria>Sphingomonadales>Sphingomonadaceae>Sphingomonas>unclassified&nbsp;Sphingomonas
Alicyclobacillus acidocaldarius	S	405212	1952	0.02551	1104	0.007294	1343	0.006046	1952	0.02403	NA	NA	1870	0.02551	cellular&nbsp;organisms>Bacteria>Terrabacteria&nbsp;group>Firmicutes>Bacilli>Bacillales>Alicyclobacillaceae>Alicyclobacillus
Nocardiopsis dassonvillei	S	2014	2070	0.02549	NA	NA	1418	0.006384	2070	0.02549	NA	NA	1816	0.02477	cellular&nbsp;organisms>Bacteria>Terrabacteria&nbsp;group>Actinobacteria>Actinomycetia>Streptosporangiales>Nocardiopsaceae>Nocardiopsis
Streptomyces mobaraensis	S	35621	1866	0.02546	NA	NA	NA	NA	1842	0.02268	NA	NA	1866	0.02546	cellular&nbsp;organisms>Bacteria>Terrabacteria&nbsp;group>Actinobacteria>Actinomycetia>Streptomycetales>Streptomycetaceae>Streptomyces
Bacillus infantis	S	324767	1866	0.02546	1286	0.008497	NA	NA	1484	0.01827	1281	0.01449	1866	0.02546	cellular&nbsp;organisms>Bacteria>Terrabacteria&nbsp;group>Firmicutes>Bacilli>Bacillales>Bacillaceae>Bacillus
Streptomyces formicae	S	1616117	2066	0.02544	NA	NA	NA	NA	2066	0.02544	NA	NA	NA	NA	cellular&nbsp;organisms>Bacteria>Terrabacteria&nbsp;group>Actinobacteria>Actinomycetia>Streptomycetales>Streptomycetaceae>Streptomyces
Chryseobacterium aureum	S	2497456	3843	0.02539	3843	0.02539	2784	0.01253	1402	0.01726	1348	0.01525	NA	NA	cellular&nbsp;organisms>Bacteria>FCB&nbsp;group>Bacteroidetes/Chlorobi&nbsp;group>Bacteroidetes>Flavobacteriia>Flavobacteriales>Weeksellaceae>Chryseobacterium&nbsp;group>Chryseobacterium
Alienimonas californiensis	S	2527989	1914	0.02539	1142	0.007545	1556	0.007005	1914	0.02357	NA	NA	1861	0.02539	cellular&nbsp;organisms>Bacteria>PVC&nbsp;group>Planctomycetes>Planctomycetia>Planctomycetales>Planctomycetaceae>Alienimonas
Streptomyces buecherae	S	2763006	1904	0.02539	NA	NA	1830	0.008239	1904	0.02344	NA	NA	1861	0.02539	cellular&nbsp;organisms>Bacteria>Terrabacteria&nbsp;group>Actinobacteria>Actinomycetia>Streptomycetales>Streptomycetaceae>Streptomyces
Spirosoma pollinicola	S	2057025	1983	0.02536	1207	0.007975	NA	NA	1983	0.02442	1452	0.01642	1859	0.02536	cellular&nbsp;organisms>Bacteria>FCB&nbsp;group>Bacteroidetes/Chlorobi&nbsp;group>Bacteroidetes>Cytophagia>Cytophagales>Cytophagaceae>Spirosoma
Streptomyces davaonensis	S	348043	2060	0.02536	NA	NA	2044	0.009202	2060	0.02536	NA	NA	1798	0.02453	cellular&nbsp;organisms>Bacteria>Terrabacteria&nbsp;group>Actinobacteria>Actinomycetia>Streptomycetales>Streptomycetaceae>Streptomyces
Massilia oculi	S	945844	1858	0.02535	1566	0.01035	1486	0.00669	1672	0.02059	NA	NA	1858	0.02535	cellular&nbsp;organisms>Bacteria>Proteobacteria>Betaproteobacteria>Burkholderiales>Oxalobacteraceae>Massilia
Gordonia iterans	S	1004901	2059	0.02535	NA	NA	NA	NA	2059	0.02535	NA	NA	NA	NA	cellular&nbsp;organisms>Bacteria>Terrabacteria&nbsp;group>Actinobacteria>Actinomycetia>Corynebacteriales>Gordoniaceae>Gordonia
Methylobacterium sp. 4-46	S	426117	2058	0.02534	NA	NA	1743	0.007847	2058	0.02534	NA	NA	1830	0.02497	cellular&nbsp;organisms>Bacteria>Proteobacteria>Alphaproteobacteria>Hyphomicrobiales>Methylobacteriaceae>Methylobacterium>unclassified&nbsp;Methylobacterium
Vagococcus teuberi	S	519472	2241	0.02534	1230	0.008127	NA	NA	1276	0.01571	2241	0.02534	1252	0.01708	cellular&nbsp;organisms>Bacteria>Terrabacteria&nbsp;group>Firmicutes>Bacilli>Lactobacillales>Enterococcaceae>Vagococcus
Mycoplasma canis	S	29555	2241	0.02534	NA	NA	NA	NA	NA	NA	2241	0.02534	NA	NA	cellular&nbsp;organisms>Bacteria>Terrabacteria&nbsp;group>Tenericutes>Mollicutes>Mycoplasmatales>Mycoplasmataceae>Mycoplasmopsis
Arcobacter ellisii	S	913109	2240	0.02533	NA	NA	NA	NA	NA	NA	2240	0.02533	NA	NA	cellular&nbsp;organisms>Bacteria>Proteobacteria>delta/epsilon&nbsp;subdivisions>Epsilonproteobacteria>Campylobacterales>Campylobacteraceae>Arcobacter&nbsp;group>Arcobacter
Myroides fluvii	S	2572594	5621	0.02531	3362	0.02221	5621	0.02531	NA	NA	NA	NA	NA	NA	cellular&nbsp;organisms>Bacteria>FCB&nbsp;group>Bacteroidetes/Chlorobi&nbsp;group>Bacteroidetes>Flavobacteriia>Flavobacteriales>Flavobacteriaceae>Myroides
Acidipropionibacterium acidipropionici	S	1748	2056	0.02531	NA	NA	NA	NA	2056	0.02531	NA	NA	NA	NA	cellular&nbsp;organisms>Bacteria>Terrabacteria&nbsp;group>Actinobacteria>Actinomycetia>Propionibacteriales>Propionibacteriaceae>Acidipropionibacterium
Parvibaculum lavamentivorans	S	256618	2055	0.0253	NA	NA	NA	NA	2055	0.0253	NA	NA	NA	NA	cellular&nbsp;organisms>Bacteria>Proteobacteria>Alphaproteobacteria>Hyphomicrobiales>Parvibaculaceae>Parvibaculum
Streptococcus cristatus	S	45634	2237	0.0253	NA	NA	NA	NA	1498	0.01844	2237	0.0253	NA	NA	cellular&nbsp;organisms>Bacteria>Terrabacteria&nbsp;group>Firmicutes>Bacilli>Lactobacillales>Streptococcaceae>Streptococcus
Geobacter sp. FeAm09	S	2597769	1853	0.02528	NA	NA	1287	0.005794	1747	0.02151	NA	NA	1853	0.02528	cellular&nbsp;organisms>Bacteria>Proteobacteria>delta/epsilon&nbsp;subdivisions>Deltaproteobacteria>Desulfuromonadales>Geobacteraceae>Geobacter>unclassified&nbsp;Geobacter
Treponema azotonutricium	S	150829	1944	0.02528	1277	0.008437	NA	NA	1944	0.02394	1851	0.02093	1853	0.02528	cellular&nbsp;organisms>Bacteria>Spirochaetes>Spirochaetia>Spirochaetales>Spirochaetaceae>Treponema
Runella sp. SP2	S	2268026	2083	0.02525	2083	0.01376	1754	0.007896	1925	0.0237	1187	0.01342	1851	0.02525	cellular&nbsp;organisms>Bacteria>FCB&nbsp;group>Bacteroidetes/Chlorobi&nbsp;group>Bacteroidetes>Cytophagia>Cytophagales>Cytophagaceae>Runella>unclassified&nbsp;Runella
Ligilactobacillus saerimneri	S	228229	2233	0.02525	NA	NA	NA	NA	NA	NA	2233	0.02525	NA	NA	cellular&nbsp;organisms>Bacteria>Terrabacteria&nbsp;group>Firmicutes>Bacilli>Lactobacillales>Lactobacillaceae>Ligilactobacillus
Winogradskyella sp. PG-2	S	754409	4052	0.02523	3819	0.02523	4052	0.01824	1280	0.01576	1153	0.01304	NA	NA	cellular&nbsp;organisms>Bacteria>FCB&nbsp;group>Bacteroidetes/Chlorobi&nbsp;group>Bacteroidetes>Flavobacteriia>Flavobacteriales>Flavobacteriaceae>Winogradskyella>unclassified&nbsp;Winogradskyella
Streptococcus sp. oral taxon 061	S	712623	2231	0.02523	NA	NA	NA	NA	NA	NA	2231	0.02523	NA	NA	cellular&nbsp;organisms>Bacteria>Terrabacteria&nbsp;group>Firmicutes>Bacilli>Lactobacillales>Streptococcaceae>Streptococcus>unclassified&nbsp;Streptococcus
Hymenobacter qilianensis	S	1385715	2230	0.02522	NA	NA	NA	NA	1725	0.02124	2230	0.02522	1611	0.02198	cellular&nbsp;organisms>Bacteria>FCB&nbsp;group>Bacteroidetes/Chlorobi&nbsp;group>Bacteroidetes>Cytophagia>Cytophagales>Hymenobacteraceae>Hymenobacter
Adhaeribacter radiodurans	S	2745197	2573	0.02519	1850	0.01222	2573	0.01158	2046	0.02519	NA	NA	1507	0.02056	cellular&nbsp;organisms>Bacteria>FCB&nbsp;group>Bacteroidetes/Chlorobi&nbsp;group>Bacteroidetes>Cytophagia>Cytophagales>Hymenobacteraceae>Adhaeribacter
Streptomyces sp. NHF165	S	2175864	1846	0.02518	NA	NA	1430	0.006438	1680	0.02069	NA	NA	1846	0.02518	cellular&nbsp;organisms>Bacteria>Terrabacteria&nbsp;group>Actinobacteria>Actinomycetia>Streptomycetales>Streptomycetaceae>Streptomyces>unclassified&nbsp;Streptomyces
Planococcus sp. PAMC 21323	S	1526927	3811	0.02518	3811	0.02518	2405	0.01083	NA	NA	NA	NA	NA	NA	cellular&nbsp;organisms>Bacteria>Terrabacteria&nbsp;group>Firmicutes>Bacilli>Bacillales>Planococcaceae>Planococcus>unclassified&nbsp;Planococcus
Maribacter sp. T28	S	1836467	2253	0.02516	2123	0.01403	2253	0.01014	1881	0.02316	2225	0.02516	NA	NA	cellular&nbsp;organisms>Bacteria>FCB&nbsp;group>Bacteroidetes/Chlorobi&nbsp;group>Bacteroidetes>Flavobacteriia>Flavobacteriales>Flavobacteriaceae>Maribacter>unclassified&nbsp;Maribacter
Spirosoma taeanense	S	2735870	2042	0.02514	1279	0.008451	NA	NA	2042	0.02514	NA	NA	1519	0.02072	cellular&nbsp;organisms>Bacteria>FCB&nbsp;group>Bacteroidetes/Chlorobi&nbsp;group>Bacteroidetes>Cytophagia>Cytophagales>Cytophagaceae>Spirosoma
Streptomyces rapamycinicus	S	1226757	1843	0.02514	NA	NA	NA	NA	1783	0.02195	NA	NA	1843	0.02514	cellular&nbsp;organisms>Bacteria>Terrabacteria&nbsp;group>Actinobacteria>Actinomycetia>Streptomycetales>Streptomycetaceae>Streptomyces
Massilia sp. YMA4	S	1593482	1881	0.02513	NA	NA	NA	NA	1881	0.02316	NA	NA	1842	0.02513	cellular&nbsp;organisms>Bacteria>Proteobacteria>Betaproteobacteria>Burkholderiales>Oxalobacteraceae>Massilia>unclassified&nbsp;Massilia
Klebsiella aerogenes	S	548	2041	0.02513	NA	NA	1670	0.007518	2041	0.02513	NA	NA	1629	0.02222	cellular&nbsp;organisms>Bacteria>Proteobacteria>Gammaproteobacteria>Enterobacterales>Enterobacteriaceae>Klebsiella
Bradyrhizobium sp. CCBAU 51753	S	1325100	1841	0.02512	NA	NA	NA	NA	1790	0.02204	NA	NA	1841	0.02512	cellular&nbsp;organisms>Bacteria>Proteobacteria>Alphaproteobacteria>Hyphomicrobiales>Bradyrhizobiaceae>Bradyrhizobium>unclassified&nbsp;Bradyrhizobium
Sulfurimonas gotlandica	S	1176482	2221	0.02512	NA	NA	NA	NA	NA	NA	2221	0.02512	NA	NA	cellular&nbsp;organisms>Bacteria>Proteobacteria>delta/epsilon&nbsp;subdivisions>Epsilonproteobacteria>Campylobacterales>Thiovulaceae>Sulfurimonas
Humibacter sp. WJ7-1	S	2599293	1841	0.02512	NA	NA	NA	NA	1774	0.02184	NA	NA	1841	0.02512	cellular&nbsp;organisms>Bacteria>Terrabacteria&nbsp;group>Actinobacteria>Actinomycetia>Micrococcales>Microbacteriaceae>Humibacter>unclassified&nbsp;Humibacter
Streptomyces sp. MBT27	S	1488356	2040	0.02512	NA	NA	NA	NA	2040	0.02512	NA	NA	1833	0.02501	cellular&nbsp;organisms>Bacteria>Terrabacteria&nbsp;group>Actinobacteria>Actinomycetia>Streptomycetales>Streptomycetaceae>Streptomyces>unclassified&nbsp;Streptomyces
Paenibacillus stellifer	S	169760	1970	0.02512	NA	NA	1236	0.005564	1970	0.02426	1188	0.01344	1841	0.02512	cellular&nbsp;organisms>Bacteria>Terrabacteria&nbsp;group>Firmicutes>Bacilli>Bacillales>Paenibacillaceae>Paenibacillus
Microlunatus sagamiharensis	S	546874	2172	0.02511	NA	NA	2172	0.009778	2039	0.02511	NA	NA	1815	0.02476	cellular&nbsp;organisms>Bacteria>Terrabacteria&nbsp;group>Actinobacteria>Actinomycetia>Propionibacteriales>Propionibacteriaceae>Microlunatus
Nocardioides humi	S	449461	1840	0.0251	NA	NA	NA	NA	1705	0.02099	NA	NA	1840	0.0251	cellular&nbsp;organisms>Bacteria>Terrabacteria&nbsp;group>Actinobacteria>Actinomycetia>Propionibacteriales>Nocardioidaceae>Nocardioides
Hymenobacter swuensis	S	1446467	2037	0.02508	1546	0.01021	NA	NA	2037	0.02508	NA	NA	1386	0.01891	cellular&nbsp;organisms>Bacteria>FCB&nbsp;group>Bacteroidetes/Chlorobi&nbsp;group>Bacteroidetes>Cytophagia>Cytophagales>Hymenobacteraceae>Hymenobacter
Sphaerochaeta coccoides	S	273376	2037	0.02508	1189	0.007856	1200	0.005402	2037	0.02508	1212	0.01371	1626	0.02218	cellular&nbsp;organisms>Bacteria>Spirochaetes>Spirochaetia>Spirochaetales>Spirochaetaceae>Sphaerochaeta
Desulfovibrio sp. 86	S	2666132	1931	0.02506	NA	NA	NA	NA	1931	0.02378	NA	NA	1837	0.02506	cellular&nbsp;organisms>Bacteria>Proteobacteria>delta/epsilon&nbsp;subdivisions>Deltaproteobacteria>Desulfovibrionales>Desulfovibrionaceae>Desulfovibrio>unclassified&nbsp;Desulfovibrio
Nakamurella multipartita	S	53461	1835	0.02503	NA	NA	NA	NA	1544	0.01901	NA	NA	1835	0.02503	cellular&nbsp;organisms>Bacteria>Terrabacteria&nbsp;group>Actinobacteria>Actinomycetia>Nakamurellales>Nakamurellaceae>Nakamurella
Streptomyces sp. NA04227	S	2742136	1895	0.02503	NA	NA	NA	NA	1895	0.02333	NA	NA	1835	0.02503	cellular&nbsp;organisms>Bacteria>Terrabacteria&nbsp;group>Actinobacteria>Actinomycetia>Streptomycetales>Streptomycetaceae>Streptomyces>unclassified&nbsp;Streptomyces
Geobacter sp. M21	S	443144	2032	0.02502	NA	NA	NA	NA	2032	0.02502	NA	NA	1641	0.02239	cellular&nbsp;organisms>Bacteria>Proteobacteria>delta/epsilon&nbsp;subdivisions>Deltaproteobacteria>Desulfuromonadales>Geobacteraceae>Geobacter>unclassified&nbsp;Geobacter
Rhodococcus hoagii	S	43767	1833	0.02501	NA	NA	NA	NA	1658	0.02041	NA	NA	1833	0.02501	cellular&nbsp;organisms>Bacteria>Terrabacteria&nbsp;group>Actinobacteria>Actinomycetia>Corynebacteriales>Nocardiaceae>Rhodococcus
Streptococcus porcinus	S	1340	2404	0.02499	2404	0.01588	NA	NA	1242	0.01529	2210	0.02499	1652	0.02254	cellular&nbsp;organisms>Bacteria>Terrabacteria&nbsp;group>Firmicutes>Bacilli>Lactobacillales>Streptococcaceae>Streptococcus
Belliella baltica	S	232259	2209	0.02498	1650	0.0109	NA	NA	1974	0.02431	2209	0.02498	1541	0.02102	cellular&nbsp;organisms>Bacteria>FCB&nbsp;group>Bacteroidetes/Chlorobi&nbsp;group>Bacteroidetes>Cytophagia>Cytophagales>Cyclobacteriaceae>Belliella
Geobacter bremensis	S	60035	1830	0.02497	NA	NA	NA	NA	1666	0.02051	NA	NA	1830	0.02497	cellular&nbsp;organisms>Bacteria>Proteobacteria>delta/epsilon&nbsp;subdivisions>Deltaproteobacteria>Desulfuromonadales>Geobacteraceae>Geobacter
Bacillus sp. THAF10	S	2587848	2208	0.02497	1700	0.01123	NA	NA	1206	0.01485	2208	0.02497	NA	NA	cellular&nbsp;organisms>Bacteria>Terrabacteria&nbsp;group>Firmicutes>Bacilli>Bacillales>Bacillaceae>Bacillus>unclassified&nbsp;Bacillus&nbsp;(in:&nbsp;Bacteria)
Bacillus sporothermodurans	S	46224	2206	0.02495	1887	0.01247	1391	0.006262	1189	0.01464	2206	0.02495	NA	NA	cellular&nbsp;organisms>Bacteria>Terrabacteria&nbsp;group>Firmicutes>Bacilli>Bacillales>Bacillaceae>Bacillus
Streptococcus gordonii	S	1302	2206	0.02495	1964	0.01298	NA	NA	1731	0.02131	2206	0.02495	1234	0.01683	cellular&nbsp;organisms>Bacteria>Terrabacteria&nbsp;group>Firmicutes>Bacilli>Lactobacillales>Streptococcaceae>Streptococcus
Methylobacterium currus	S	2051553	2025	0.02493	NA	NA	NA	NA	2025	0.02493	NA	NA	NA	NA	cellular&nbsp;organisms>Bacteria>Proteobacteria>Alphaproteobacteria>Hyphomicrobiales>Methylobacteriaceae>Methylobacterium
Sphingobacterium mizutaii	S	1010	2023	0.02491	1604	0.0106	1642	0.007392	2023	0.02491	1582	0.01789	1284	0.01752	cellular&nbsp;organisms>Bacteria>FCB&nbsp;group>Bacteroidetes/Chlorobi&nbsp;group>Bacteroidetes>Sphingobacteriia>Sphingobacteriales>Sphingobacteriaceae>Sphingobacterium
Poseidonibacter lekithochrous	S	1904463	2146	0.02491	1432	0.009462	NA	NA	2023	0.02491	2146	0.02427	NA	NA	cellular&nbsp;organisms>Bacteria>Proteobacteria>delta/epsilon&nbsp;subdivisions>Epsilonproteobacteria>Campylobacterales>Campylobacteraceae>Arcobacter&nbsp;group>Poseidonibacter
Phoenicibacter congonensis	S	1944646	2203	0.02491	NA	NA	1391	0.006262	1589	0.01956	2203	0.02491	1823	0.02487	cellular&nbsp;organisms>Bacteria>Terrabacteria&nbsp;group>Actinobacteria>Coriobacteriia>Eggerthellales>Eggerthellaceae>Phoenicibacter
Flavobacterium pallidum	S	2172098	1997	0.0249	1997	0.01319	1994	0.008977	1911	0.02353	1413	0.01598	1825	0.0249	cellular&nbsp;organisms>Bacteria>FCB&nbsp;group>Bacteroidetes/Chlorobi&nbsp;group>Bacteroidetes>Flavobacteriia>Flavobacteriales>Flavobacteriaceae>Flavobacterium
Bradyrhizobium sp. ORS 278	S	114615	1825	0.0249	NA	NA	NA	NA	1821	0.02242	NA	NA	1825	0.0249	cellular&nbsp;organisms>Bacteria>Proteobacteria>Alphaproteobacteria>Hyphomicrobiales>Bradyrhizobiaceae>Bradyrhizobium>unclassified&nbsp;Bradyrhizobium
Desulfovibrio marinus	S	370038	1921	0.0249	NA	NA	1184	0.00533	1921	0.02365	NA	NA	1825	0.0249	cellular&nbsp;organisms>Bacteria>Proteobacteria>delta/epsilon&nbsp;subdivisions>Deltaproteobacteria>Desulfovibrionales>Desulfovibrionaceae>Desulfovibrio
Fimbriimonas ginsengisoli	S	1005039	1824	0.02488	NA	NA	NA	NA	1382	0.01702	NA	NA	1824	0.02488	cellular&nbsp;organisms>Bacteria>Terrabacteria&nbsp;group>Armatimonadetes>Fimbriimonadia>Fimbriimonadales>Fimbriimonadaceae>Fimbriimonas
Limosilactobacillus vaginalis	S	1633	2200	0.02488	NA	NA	NA	NA	NA	NA	2200	0.02488	NA	NA	cellular&nbsp;organisms>Bacteria>Terrabacteria&nbsp;group>Firmicutes>Bacilli>Lactobacillales>Lactobacillaceae>Limosilactobacillus
Cohnella sp. MFER-1	S	2728023	1941	0.02487	1278	0.008444	1362	0.006132	1941	0.0239	1080	0.01221	1823	0.02487	cellular&nbsp;organisms>Bacteria>Terrabacteria&nbsp;group>Firmicutes>Bacilli>Bacillales>Paenibacillaceae>Cohnella>unclassified&nbsp;Cohnella
Staphylococcus simulans	S	1286	2559	0.02487	2559	0.01691	1349	0.006073	1368	0.01684	2199	0.02487	NA	NA	cellular&nbsp;organisms>Bacteria>Terrabacteria&nbsp;group>Firmicutes>Bacilli>Bacillales>Staphylococcaceae>Staphylococcus
Prosthecochloris sp. CIB 2401	S	1868325	1822	0.02486	NA	NA	NA	NA	1535	0.0189	NA	NA	1822	0.02486	cellular&nbsp;organisms>Bacteria>FCB&nbsp;group>Bacteroidetes/Chlorobi&nbsp;group>Chlorobi>Chlorobia>Chlorobiales>Chlorobiaceae>Prosthecochloris>unclassified&nbsp;Prosthecochloris
Verrucosispora sp. NA02020	S	2742132	1822	0.02486	NA	NA	NA	NA	NA	NA	NA	NA	1822	0.02486	cellular&nbsp;organisms>Bacteria>Terrabacteria&nbsp;group>Actinobacteria>Actinomycetia>Micromonosporales>Micromonosporaceae>Verrucosispora>unclassified&nbsp;Verrucosispora
Paenibacillus sp. BIHB4019	S	1870819	2033	0.02483	NA	NA	NA	NA	1565	0.01927	2033	0.02299	1820	0.02483	cellular&nbsp;organisms>Bacteria>Terrabacteria&nbsp;group>Firmicutes>Bacilli>Bacillales>Paenibacillaceae>Paenibacillus>unclassified&nbsp;Paenibacillus
Marinomonas foliarum	S	491950	3099	0.02482	3099	0.02048	NA	NA	2016	0.02482	NA	NA	NA	NA	cellular&nbsp;organisms>Bacteria>Proteobacteria>Gammaproteobacteria>Oceanospirillales>Oceanospirillaceae>Marinomonas
Nocardioides marinisabuli	S	419476	1822	0.02482	NA	NA	NA	NA	1822	0.02243	NA	NA	1819	0.02482	cellular&nbsp;organisms>Bacteria>Terrabacteria&nbsp;group>Actinobacteria>Actinomycetia>Propionibacteriales>Nocardioidaceae>Nocardioides
Crenobacter cavernae	S	2290923	2014	0.0248	NA	NA	NA	NA	2014	0.0248	NA	NA	NA	NA	cellular&nbsp;organisms>Bacteria>Proteobacteria>Betaproteobacteria>Neisseriales>Neisseriaceae>Crenobacter
Anaerohalosphaera lusitana	S	1936003	2014	0.0248	1039	0.006865	1023	0.004606	2014	0.0248	1256	0.0142	1790	0.02442	cellular&nbsp;organisms>Bacteria>PVC&nbsp;group>Planctomycetes>Phycisphaerae>Sedimentisphaerales>Anaerohalosphaeraceae>Anaerohalosphaera
Nonlabens dokdonensis	S	328515	2192	0.02479	1493	0.009865	2071	0.009324	NA	NA	2192	0.02479	NA	NA	cellular&nbsp;organisms>Bacteria>FCB&nbsp;group>Bacteroidetes/Chlorobi&nbsp;group>Bacteroidetes>Flavobacteriia>Flavobacteriales>Flavobacteriaceae>Nonlabens
Stella humosa	S	94	2012	0.02477	1685	0.01113	1646	0.00741	2012	0.02477	NA	NA	1680	0.02292	cellular&nbsp;organisms>Bacteria>Proteobacteria>Alphaproteobacteria>Rhodospirillales>Acetobacteraceae>Stella
Cellulomonas sp. JZ18	S	2654191	2142	0.02477	NA	NA	2142	0.009643	1801	0.02217	NA	NA	1816	0.02477	cellular&nbsp;organisms>Bacteria>Terrabacteria&nbsp;group>Actinobacteria>Actinomycetia>Micrococcales>Cellulomonadaceae>Cellulomonas>unclassified&nbsp;Cellulomonas
Flavobacterium sp. P2-65	S	2748320	5496	0.02474	2470	0.01632	5496	0.02474	1278	0.01574	1070	0.0121	NA	NA	cellular&nbsp;organisms>Bacteria>FCB&nbsp;group>Bacteroidetes/Chlorobi&nbsp;group>Bacteroidetes>Flavobacteriia>Flavobacteriales>Flavobacteriaceae>Flavobacterium>unclassified&nbsp;Flavobacterium
Lacipirellula limnantheis	S	2528024	2009	0.02474	NA	NA	NA	NA	2009	0.02474	NA	NA	1656	0.02259	cellular&nbsp;organisms>Bacteria>PVC&nbsp;group>Planctomycetes>Planctomycetia>Pirellulales>Lacipirellulaceae>Lacipirellula
Gramella fulva	S	2126553	1809	0.02468	1554	0.01027	1277	0.005749	1702	0.02096	1736	0.01963	1809	0.02468	cellular&nbsp;organisms>Bacteria>FCB&nbsp;group>Bacteroidetes/Chlorobi&nbsp;group>Bacteroidetes>Flavobacteriia>Flavobacteriales>Flavobacteriaceae>Gramella
Dolosigranulum pigrum	S	29394	2182	0.02468	1339	0.008847	1169	0.005263	1610	0.01982	2182	0.02468	1549	0.02113	cellular&nbsp;organisms>Bacteria>Terrabacteria&nbsp;group>Firmicutes>Bacilli>Lactobacillales>Carnobacteriaceae>Dolosigranulum
Geobacter uraniireducens	S	351604	2003	0.02466	NA	NA	1534	0.006906	2003	0.02466	NA	NA	1554	0.0212	cellular&nbsp;organisms>Bacteria>Proteobacteria>delta/epsilon&nbsp;subdivisions>Deltaproteobacteria>Desulfuromonadales>Geobacteraceae>Geobacter
Paraburkholderia tropica	S	92647	3597	0.02464	3597	0.02377	1461	0.006577	1766	0.02174	NA	NA	1806	0.02464	cellular&nbsp;organisms>Bacteria>Proteobacteria>Betaproteobacteria>Burkholderiales>Burkholderiaceae>Paraburkholderia
Pseudodesulfovibrio mercurii	S	641491	1806	0.02464	1462	0.00966	1446	0.00651	1629	0.02006	NA	NA	1806	0.02464	cellular&nbsp;organisms>Bacteria>Proteobacteria>delta/epsilon&nbsp;subdivisions>Deltaproteobacteria>Desulfovibrionales>Desulfovibrionaceae>Pseudodesulfovibrio
Vagococcus carniphilus	S	218144	2177	0.02462	1494	0.009871	NA	NA	1395	0.01718	2177	0.02462	1471	0.02007	cellular&nbsp;organisms>Bacteria>Terrabacteria&nbsp;group>Firmicutes>Bacilli>Lactobacillales>Enterococcaceae>Vagococcus
Aquimarina sp. TRL1	S	2736252	4206	0.02461	3724	0.02461	4206	0.01894	1302	0.01603	1502	0.01699	1106	0.01509	cellular&nbsp;organisms>Bacteria>FCB&nbsp;group>Bacteroidetes/Chlorobi&nbsp;group>Bacteroidetes>Flavobacteriia>Flavobacteriales>Flavobacteriaceae>Aquimarina>unclassified&nbsp;Aquimarina
Sphaerotilus natans	S	34103	1998	0.0246	1474	0.009739	1340	0.006033	1998	0.0246	NA	NA	1749	0.02386	cellular&nbsp;organisms>Bacteria>Proteobacteria>Betaproteobacteria>Burkholderiales>Burkholderiales&nbsp;genera&nbsp;incertae&nbsp;sedis>Sphaerotilus
Pseudoalteromonas rubra	S	43658	2174	0.02459	NA	NA	NA	NA	NA	NA	2174	0.02459	NA	NA	cellular&nbsp;organisms>Bacteria>Proteobacteria>Gammaproteobacteria>Alteromonadales>Pseudoalteromonadaceae>Pseudoalteromonas
Sphingobacterium sp. DR205	S	2713573	2373	0.02458	2373	0.01568	2301	0.01036	1712	0.02108	1556	0.0176	1802	0.02458	cellular&nbsp;organisms>Bacteria>FCB&nbsp;group>Bacteroidetes/Chlorobi&nbsp;group>Bacteroidetes>Sphingobacteriia>Sphingobacteriales>Sphingobacteriaceae>Sphingobacterium>unclassified&nbsp;Sphingobacterium
Streptomyces sp. WAC 01438	S	2203204	1996	0.02458	NA	NA	NA	NA	1996	0.02458	NA	NA	NA	NA	cellular&nbsp;organisms>Bacteria>Terrabacteria&nbsp;group>Actinobacteria>Actinomycetia>Streptomycetales>Streptomycetaceae>Streptomyces>unclassified&nbsp;Streptomyces
Arthrobacter citreus	S	1670	2677	0.02456	2677	0.01769	2214	0.009967	1950	0.02401	2172	0.02456	1674	0.02284	cellular&nbsp;organisms>Bacteria>Terrabacteria&nbsp;group>Actinobacteria>Actinomycetia>Micrococcales>Micrococcaceae>Arthrobacter
Streptomyces sp. NEAU-sy36	S	2751189	1995	0.02456	NA	NA	NA	NA	1995	0.02456	NA	NA	NA	NA	cellular&nbsp;organisms>Bacteria>Terrabacteria&nbsp;group>Actinobacteria>Actinomycetia>Streptomycetales>Streptomycetaceae>Streptomyces>unclassified&nbsp;Streptomyces
Streptococcus sp. CNU G2	S	2686210	3717	0.02456	3717	0.02456	NA	NA	NA	NA	NA	NA	NA	NA	cellular&nbsp;organisms>Bacteria>Terrabacteria&nbsp;group>Firmicutes>Bacilli>Lactobacillales>Streptococcaceae>Streptococcus>unclassified&nbsp;Streptococcus
Olleya sp. Bg11-27	S	2058135	3684	0.02455	2982	0.0197	3684	0.01659	NA	NA	2171	0.02455	NA	NA	cellular&nbsp;organisms>Bacteria>FCB&nbsp;group>Bacteroidetes/Chlorobi&nbsp;group>Bacteroidetes>Flavobacteriia>Flavobacteriales>Flavobacteriaceae>Olleya>unclassified&nbsp;Olleya
Gimesia chilikensis	S	2605989	1902	0.02454	NA	NA	NA	NA	1902	0.02342	NA	NA	1799	0.02454	cellular&nbsp;organisms>Bacteria>PVC&nbsp;group>Planctomycetes>Planctomycetia>Planctomycetales>Planctomycetaceae>Gimesia
Chromobacterium vaccinii	S	1108595	1803	0.02453	NA	NA	NA	NA	1803	0.0222	NA	NA	1798	0.02453	cellular&nbsp;organisms>Bacteria>Proteobacteria>Betaproteobacteria>Neisseriales>Chromobacteriaceae>Chromobacterium&nbsp;group>Chromobacterium
Mucilaginibacter paludis	S	423351	1947	0.02452	1251	0.008266	1051	0.004732	1947	0.02397	1896	0.02144	1797	0.02452	cellular&nbsp;organisms>Bacteria>FCB&nbsp;group>Bacteroidetes/Chlorobi&nbsp;group>Bacteroidetes>Sphingobacteriia>Sphingobacteriales>Sphingobacteriaceae>Mucilaginibacter
Streptomyces sp. M2	S	646637	2906	0.02449	NA	NA	2906	0.01308	1644	0.02024	NA	NA	1795	0.02449	cellular&nbsp;organisms>Bacteria>Terrabacteria&nbsp;group>Actinobacteria>Actinomycetia>Streptomycetales>Streptomycetaceae>Streptomyces>unclassified&nbsp;Streptomyces
Desulfuromonas soudanensis	S	1603606	1988	0.02448	1089	0.007195	NA	NA	1988	0.02448	NA	NA	1783	0.02432	cellular&nbsp;organisms>Bacteria>Proteobacteria>delta/epsilon&nbsp;subdivisions>Deltaproteobacteria>Desulfuromonadales>Desulfuromonadaceae>Desulfuromonas
Flavihumibacter sp. SB-02	S	2676868	1908	0.02447	1640	0.01084	1116	0.005024	1908	0.02349	1199	0.01356	1794	0.02447	cellular&nbsp;organisms>Bacteria>FCB&nbsp;group>Bacteroidetes/Chlorobi&nbsp;group>Bacteroidetes>Chitinophagia>Chitinophagales>Chitinophagaceae>Flavihumibacter>unclassified&nbsp;Flavihumibacter
Shinella sp. PSBB067	S	2715959	1934	0.02447	NA	NA	NA	NA	1934	0.02381	NA	NA	1794	0.02447	cellular&nbsp;organisms>Bacteria>Proteobacteria>Alphaproteobacteria>Hyphomicrobiales>Rhizobiaceae>Shinella>unclassified&nbsp;Shinella
Hymenobacter baengnokdamensis	S	2615203	1793	0.02446	NA	NA	NA	NA	NA	NA	NA	NA	1793	0.02446	cellular&nbsp;organisms>Bacteria>FCB&nbsp;group>Bacteroidetes/Chlorobi&nbsp;group>Bacteroidetes>Cytophagia>Cytophagales>Hymenobacteraceae>Hymenobacter
Pseudodesulfovibrio indicus	S	1716143	1969	0.02445	NA	NA	1441	0.006487	1969	0.02424	NA	NA	1792	0.02445	cellular&nbsp;organisms>Bacteria>Proteobacteria>delta/epsilon&nbsp;subdivisions>Deltaproteobacteria>Desulfovibrionales>Desulfovibrionaceae>Pseudodesulfovibrio
Limosilactobacillus mucosae	S	97478	2162	0.02445	NA	NA	NA	NA	1134	0.01396	2162	0.02445	NA	NA	cellular&nbsp;organisms>Bacteria>Terrabacteria&nbsp;group>Firmicutes>Bacilli>Lactobacillales>Lactobacillaceae>Limosilactobacillus
Chondrocystis sp. NIES-4102	S	2005460	2160	0.02443	NA	NA	NA	NA	NA	NA	2160	0.02443	NA	NA	cellular&nbsp;organisms>Bacteria>Terrabacteria&nbsp;group>Cyanobacteria/Melainabacteria&nbsp;group>Cyanobacteria>Oscillatoriophycideae>Chroococcales>Chroococcaceae>Chondrocystis>unclassified&nbsp;Chondrocystis
Pediococcus acidilactici	S	1254	2160	0.02443	1469	0.009706	NA	NA	NA	NA	2160	0.02443	NA	NA	cellular&nbsp;organisms>Bacteria>Terrabacteria&nbsp;group>Firmicutes>Bacilli>Lactobacillales>Lactobacillaceae>Pediococcus>Pediococcus&nbsp;acidilactici&nbsp;group
Micromonospora coxensis	S	356852	1983	0.02442	NA	NA	NA	NA	1983	0.02442	NA	NA	NA	NA	cellular&nbsp;organisms>Bacteria>Terrabacteria&nbsp;group>Actinobacteria>Actinomycetia>Micromonosporales>Micromonosporaceae>Micromonospora
Polaribacter sp. SA4-12	S	1312072	3050	0.02439	2756	0.01821	3050	0.01373	NA	NA	2157	0.02439	NA	NA	cellular&nbsp;organisms>Bacteria>FCB&nbsp;group>Bacteroidetes/Chlorobi&nbsp;group>Bacteroidetes>Flavobacteriia>Flavobacteriales>Flavobacteriaceae>Polaribacter>unclassified&nbsp;Polaribacter
Streptomyces xinghaiensis	S	1038928	1869	0.02439	NA	NA	NA	NA	1869	0.02301	NA	NA	1788	0.02439	cellular&nbsp;organisms>Bacteria>Terrabacteria&nbsp;group>Actinobacteria>Actinomycetia>Streptomycetales>Streptomycetaceae>Streptomyces
Paenibacillus sp. IHBB 10380	S	1566358	2157	0.02439	1381	0.009125	1374	0.006186	NA	NA	2157	0.02439	NA	NA	cellular&nbsp;organisms>Bacteria>Terrabacteria&nbsp;group>Firmicutes>Bacilli>Bacillales>Paenibacillaceae>Paenibacillus>unclassified&nbsp;Paenibacillus
Azoarcus sp. CIB	S	198107	1787	0.02438	NA	NA	NA	NA	1518	0.01869	NA	NA	1787	0.02438	cellular&nbsp;organisms>Bacteria>Proteobacteria>Betaproteobacteria>Rhodocyclales>Zoogloeaceae>Azoarcus>unclassified&nbsp;Azoarcus
Desulfococcus multivorans	S	897	1784	0.02434	NA	NA	NA	NA	1739	0.02141	NA	NA	1784	0.02434	cellular&nbsp;organisms>Bacteria>Proteobacteria>delta/epsilon&nbsp;subdivisions>Deltaproteobacteria>Desulfobacterales>Desulfobacteraceae>Desulfococcus
Bifidobacterium scardovii	S	158787	1784	0.02434	NA	NA	1173	0.005281	1763	0.02171	NA	NA	1784	0.02434	cellular&nbsp;organisms>Bacteria>Terrabacteria&nbsp;group>Actinobacteria>Actinomycetia>Bifidobacteriales>Bifidobacteriaceae>Bifidobacterium
Desulfobulbus oralis	S	1986146	1976	0.02433	NA	NA	NA	NA	1976	0.02433	NA	NA	1529	0.02086	cellular&nbsp;organisms>Bacteria>Proteobacteria>delta/epsilon&nbsp;subdivisions>Deltaproteobacteria>Desulfobacterales>Desulfobulbaceae>Desulfobulbus
Treponema phagedenis	S	162	1900	0.02432	1858	0.01228	NA	NA	1608	0.0198	1900	0.02149	1783	0.02432	cellular&nbsp;organisms>Bacteria>Spirochaetes>Spirochaetia>Spirochaetales>Spirochaetaceae>Treponema
Burkholderia contaminans	S	488447	1781	0.0243	NA	NA	NA	NA	1748	0.02152	NA	NA	1781	0.0243	cellular&nbsp;organisms>Bacteria>Proteobacteria>Betaproteobacteria>Burkholderiales>Burkholderiaceae>Burkholderia>Burkholderia&nbsp;cepacia&nbsp;complex
Deferribacter desulfuricans	S	197162	2147	0.02428	NA	NA	NA	NA	NA	NA	2147	0.02428	NA	NA	cellular&nbsp;organisms>Bacteria>Deferribacteres>Deferribacteres>Deferribacterales>Deferribacteraceae>Deferribacter
Massilia flava	S	871742	1972	0.02428	NA	NA	1384	0.006231	1972	0.02428	NA	NA	1635	0.02231	cellular&nbsp;organisms>Bacteria>Proteobacteria>Betaproteobacteria>Burkholderiales>Oxalobacteraceae>Massilia
Pimelobacter simplex	S	2045	1883	0.02428	NA	NA	1765	0.007946	1883	0.02318	NA	NA	1780	0.02428	cellular&nbsp;organisms>Bacteria>Terrabacteria&nbsp;group>Actinobacteria>Actinomycetia>Propionibacteriales>Nocardioidaceae>Pimelobacter
Streptomyces pristinaespiralis	S	38300	1971	0.02427	NA	NA	NA	NA	1971	0.02427	NA	NA	NA	NA	cellular&nbsp;organisms>Bacteria>Terrabacteria&nbsp;group>Actinobacteria>Actinomycetia>Streptomycetales>Streptomycetaceae>Streptomyces
Beutenbergia cavernae	S	84757	1970	0.02426	NA	NA	1490	0.006708	1970	0.02426	NA	NA	1610	0.02196	cellular&nbsp;organisms>Bacteria>Terrabacteria&nbsp;group>Actinobacteria>Actinomycetia>Micrococcales>Beutenbergiaceae>Beutenbergia
Cellulophaga lytica	S	979	3258	0.02423	3050	0.02015	3258	0.01467	1968	0.02423	1945	0.022	1625	0.02217	cellular&nbsp;organisms>Bacteria>FCB&nbsp;group>Bacteroidetes/Chlorobi&nbsp;group>Bacteroidetes>Flavobacteriia>Flavobacteriales>Flavobacteriaceae>Cellulophaga
Actinoplanes derwentensis	S	113562	1927	0.02423	NA	NA	1504	0.006771	1927	0.02373	NA	NA	1776	0.02423	cellular&nbsp;organisms>Bacteria>Terrabacteria&nbsp;group>Actinobacteria>Actinomycetia>Micromonosporales>Micromonosporaceae>Actinoplanes
Micromonospora carbonacea	S	47853	1871	0.0242	NA	NA	NA	NA	1871	0.02304	NA	NA	1774	0.0242	cellular&nbsp;organisms>Bacteria>Terrabacteria&nbsp;group>Actinobacteria>Actinomycetia>Micromonosporales>Micromonosporaceae>Micromonospora
Cohnella candidum	S	2674991	1917	0.0242	NA	NA	1114	0.005015	1917	0.0236	NA	NA	1774	0.0242	cellular&nbsp;organisms>Bacteria>Terrabacteria&nbsp;group>Firmicutes>Bacilli>Bacillales>Paenibacillaceae>Cohnella
Lacinutrix sp. 5H-3-7-4	S	983544	4366	0.02418	3660	0.02418	4366	0.01966	NA	NA	1452	0.01642	NA	NA	cellular&nbsp;organisms>Bacteria>FCB&nbsp;group>Bacteroidetes/Chlorobi&nbsp;group>Bacteroidetes>Flavobacteriia>Flavobacteriales>Flavobacteriaceae>Lacinutrix>unclassified&nbsp;Lacinutrix
Pseudomonas synxantha	S	47883	4455	0.02414	2625	0.01734	4455	0.02006	1961	0.02414	NA	NA	NA	NA	cellular&nbsp;organisms>Bacteria>Proteobacteria>Gammaproteobacteria>Pseudomonadales>Pseudomonadaceae>Pseudomonas>Pseudomonas&nbsp;fluorescens&nbsp;group
Paenibacillus sp. FSL R5-0345	S	1536770	2973	0.02413	NA	NA	2973	0.01338	NA	NA	2134	0.02413	NA	NA	cellular&nbsp;organisms>Bacteria>Terrabacteria&nbsp;group>Firmicutes>Bacilli>Bacillales>Paenibacillaceae>Paenibacillus>unclassified&nbsp;Paenibacillus
Candidatus Thiodictyon syntrophicum	S	1166950	1894	0.02412	1754	0.01159	1499	0.006748	1894	0.02332	NA	NA	1768	0.02412	cellular&nbsp;organisms>Bacteria>Proteobacteria>Gammaproteobacteria>Chromatiales>Chromatiaceae>Thiodictyon
Roseiflexus sp. RS-1	S	357808	1959	0.02412	NA	NA	NA	NA	1959	0.02412	NA	NA	1545	0.02108	cellular&nbsp;organisms>Bacteria>Terrabacteria&nbsp;group>Chloroflexi>Chloroflexia>Chloroflexales>Roseiflexineae>Roseiflexaceae>Roseiflexus>unclassified&nbsp;Roseiflexus
Maribacter sp. MJ134	S	2496865	1767	0.02411	1181	0.007803	1066	0.004799	1514	0.01864	NA	NA	1767	0.02411	cellular&nbsp;organisms>Bacteria>FCB&nbsp;group>Bacteroidetes/Chlorobi&nbsp;group>Bacteroidetes>Flavobacteriia>Flavobacteriales>Flavobacteriaceae>Maribacter>unclassified&nbsp;Maribacter
Spirosoma sp. KUDC1026	S	2745947	1816	0.02409	1382	0.009131	NA	NA	1816	0.02236	1244	0.01407	1766	0.02409	cellular&nbsp;organisms>Bacteria>FCB&nbsp;group>Bacteroidetes/Chlorobi&nbsp;group>Bacteroidetes>Cytophagia>Cytophagales>Cytophagaceae>Spirosoma>unclassified&nbsp;Spirosoma
Nocardioides sp. MC1495	S	2736757	1764	0.02406	NA	NA	NA	NA	NA	NA	NA	NA	1764	0.02406	cellular&nbsp;organisms>Bacteria>Terrabacteria&nbsp;group>Actinobacteria>Actinomycetia>Propionibacteriales>Nocardioidaceae>Nocardioides>unclassified&nbsp;Nocardioides
Campylobacter lanienae	S	75658	1952	0.02403	NA	NA	NA	NA	1952	0.02403	NA	NA	NA	NA	cellular&nbsp;organisms>Bacteria>Proteobacteria>delta/epsilon&nbsp;subdivisions>Epsilonproteobacteria>Campylobacterales>Campylobacteraceae>Campylobacter
Pseudomonas knackmussii	S	65741	1952	0.02403	NA	NA	NA	NA	1952	0.02403	NA	NA	NA	NA	cellular&nbsp;organisms>Bacteria>Proteobacteria>Gammaproteobacteria>Pseudomonadales>Pseudomonadaceae>Pseudomonas
Sporomusa termitida	S	2377	2125	0.02403	NA	NA	NA	NA	1537	0.01892	2125	0.02403	1547	0.0211	cellular&nbsp;organisms>Bacteria>Terrabacteria&nbsp;group>Firmicutes>Negativicutes>Selenomonadales>Sporomusaceae>Sporomusa
Croceimicrobium hydrocarbonivorans	S	2761580	1951	0.02402	1763	0.01165	1673	0.007532	1951	0.02402	1611	0.01822	1533	0.02091	cellular&nbsp;organisms>Bacteria>FCB&nbsp;group>Bacteroidetes/Chlorobi&nbsp;group>Bacteroidetes>Flavobacteriia>Flavobacteriales>Schleiferiaceae>Croceimicrobium
Spiroplasma clarkii	S	2139	3636	0.02402	3636	0.02402	NA	NA	NA	NA	NA	NA	NA	NA	cellular&nbsp;organisms>Bacteria>Terrabacteria&nbsp;group>Tenericutes>Mollicutes>Entomoplasmatales>Spiroplasmataceae>Spiroplasma
Aequorivita sublithincola	S	101385	2562	0.02401	2363	0.01561	2562	0.01153	1950	0.02401	1339	0.01514	1325	0.01808	cellular&nbsp;organisms>Bacteria>FCB&nbsp;group>Bacteroidetes/Chlorobi&nbsp;group>Bacteroidetes>Flavobacteriia>Flavobacteriales>Flavobacteriaceae>Aequorivita
Bacillus altitudinis	S	293387	2123	0.02401	1440	0.009514	NA	NA	NA	NA	2123	0.02401	NA	NA	cellular&nbsp;organisms>Bacteria>Terrabacteria&nbsp;group>Firmicutes>Bacilli>Bacillales>Bacillaceae>Bacillus>Bacillus&nbsp;altitudinis&nbsp;complex
Paenibacillus sp. 32O-W	S	1695218	1760	0.02401	NA	NA	NA	NA	1578	0.01943	NA	NA	1760	0.02401	cellular&nbsp;organisms>Bacteria>Terrabacteria&nbsp;group>Firmicutes>Bacilli>Bacillales>Paenibacillaceae>Paenibacillus>unclassified&nbsp;Paenibacillus
Veillonella nakazawae	S	2682456	2123	0.02401	NA	NA	NA	NA	NA	NA	2123	0.02401	NA	NA	cellular&nbsp;organisms>Bacteria>Terrabacteria&nbsp;group>Firmicutes>Negativicutes>Veillonellales>Veillonellaceae>Veillonella
Pedobacter cryoconitis	S	188932	1949	0.024	1526	0.01008	1412	0.006357	1949	0.024	1380	0.01561	1602	0.02185	cellular&nbsp;organisms>Bacteria>FCB&nbsp;group>Bacteroidetes/Chlorobi&nbsp;group>Bacteroidetes>Sphingobacteriia>Sphingobacteriales>Sphingobacteriaceae>Pedobacter
Nordella sp. HKS 07	S	2712222	1924	0.024	NA	NA	1249	0.005623	1924	0.02369	NA	NA	1759	0.024	cellular&nbsp;organisms>Bacteria>Proteobacteria>Alphaproteobacteria>Hyphomicrobiales>Rhizobiales&nbsp;incertae&nbsp;sedis>Nordella>unclassified&nbsp;Nordella
Paraburkholderia fungorum	S	134537	1759	0.024	NA	NA	NA	NA	1544	0.01901	NA	NA	1759	0.024	cellular&nbsp;organisms>Bacteria>Proteobacteria>Betaproteobacteria>Burkholderiales>Burkholderiaceae>Paraburkholderia
Treponema primitia	S	88058	2121	0.02399	1089	0.007195	NA	NA	1392	0.01714	2121	0.02399	1674	0.02284	cellular&nbsp;organisms>Bacteria>Spirochaetes>Spirochaetia>Spirochaetales>Spirochaetaceae>Treponema
Shewanella sediminis	S	271097	2120	0.02398	NA	NA	NA	NA	NA	NA	2120	0.02398	NA	NA	cellular&nbsp;organisms>Bacteria>Proteobacteria>Gammaproteobacteria>Alteromonadales>Shewanellaceae>Shewanella
Paenibacillus donghaensis	S	414771	1756	0.02396	NA	NA	1332	0.005997	1492	0.01837	1438	0.01626	1756	0.02396	cellular&nbsp;organisms>Bacteria>Terrabacteria&nbsp;group>Firmicutes>Bacilli>Bacillales>Paenibacillaceae>Paenibacillus
Xanthobacter sp. YN2	S	2528964	1827	0.02394	NA	NA	NA	NA	1827	0.0225	NA	NA	1755	0.02394	cellular&nbsp;organisms>Bacteria>Proteobacteria>Alphaproteobacteria>Hyphomicrobiales>Xanthobacteraceae>Xanthobacter>unclassified&nbsp;Xanthobacter
Paraburkholderia sp. 7MH5	S	2547399	1944	0.02394	NA	NA	1667	0.007505	1944	0.02394	NA	NA	1701	0.02321	cellular&nbsp;organisms>Bacteria>Proteobacteria>Betaproteobacteria>Burkholderiales>Burkholderiaceae>Paraburkholderia>unclassified&nbsp;Paraburkholderia
Kitasatospora setae	S	2066	1908	0.02393	NA	NA	NA	NA	1908	0.02349	NA	NA	1754	0.02393	cellular&nbsp;organisms>Bacteria>Terrabacteria&nbsp;group>Actinobacteria>Actinomycetia>Streptomycetales>Streptomycetaceae>Kitasatospora
Flavobacterium nackdongense	S	2547394	3986	0.02392	3620	0.02392	3986	0.01794	1867	0.02299	1497	0.01693	1394	0.01902	cellular&nbsp;organisms>Bacteria>FCB&nbsp;group>Bacteroidetes/Chlorobi&nbsp;group>Bacteroidetes>Flavobacteriia>Flavobacteriales>Flavobacteriaceae>Flavobacterium
Kitasatospora sp. NA04385	S	2742135	1943	0.02392	NA	NA	NA	NA	1943	0.02392	NA	NA	1595	0.02176	cellular&nbsp;organisms>Bacteria>Terrabacteria&nbsp;group>Actinobacteria>Actinomycetia>Streptomycetales>Streptomycetaceae>Kitasatospora>unclassified&nbsp;Kitasatospora
Arcticibacterium luteifluviistationis	S	1784714	1894	0.02391	1677	0.01108	NA	NA	1784	0.02197	1894	0.02142	1753	0.02391	cellular&nbsp;organisms>Bacteria>FCB&nbsp;group>Bacteroidetes/Chlorobi&nbsp;group>Bacteroidetes>Cytophagia>Cytophagales>Cytophagaceae>Arcticibacterium
Lignipirellula cremea	S	2528010	1919	0.02391	1258	0.008312	1349	0.006073	1919	0.02363	NA	NA	1753	0.02391	cellular&nbsp;organisms>Bacteria>PVC&nbsp;group>Planctomycetes>Planctomycetia>Pirellulales>Pirellulaceae>Lignipirellula
Lysobacter solisilvae	S	2763317	1760	0.02387	NA	NA	1611	0.007253	1760	0.02167	NA	NA	1750	0.02387	cellular&nbsp;organisms>Bacteria>Proteobacteria>Gammaproteobacteria>Xanthomonadales>Xanthomonadaceae>Lysobacter
Jeotgalibaca ciconiae	S	2496265	2111	0.02387	1748	0.01155	NA	NA	NA	NA	2111	0.02387	1618	0.02207	cellular&nbsp;organisms>Bacteria>Terrabacteria&nbsp;group>Firmicutes>Bacilli>Lactobacillales>Carnobacteriaceae>Jeotgalibaca
Gordonia polyisoprenivorans	S	84595	3461	0.02382	NA	NA	3461	0.01558	1802	0.02219	NA	NA	1746	0.02382	cellular&nbsp;organisms>Bacteria>Terrabacteria&nbsp;group>Actinobacteria>Actinomycetia>Corynebacteriales>Gordoniaceae>Gordonia
Deinococcus metallilatus	S	1211322	1770	0.02381	NA	NA	NA	NA	1770	0.02179	NA	NA	1745	0.02381	cellular&nbsp;organisms>Bacteria>Terrabacteria&nbsp;group>Deinococcus&#x2011;Thermus>Deinococci>Deinococcales>Deinococcaceae>Deinococcus
Desulfitobacterium metallireducens	S	142877	2105	0.02381	NA	NA	NA	NA	NA	NA	2105	0.02381	1130	0.01542	cellular&nbsp;organisms>Bacteria>Terrabacteria&nbsp;group>Firmicutes>Clostridia>Eubacteriales>Peptococcaceae>Desulfitobacterium
Mesorhizobium oceanicum	S	1670800	1744	0.02379	NA	NA	NA	NA	1238	0.01524	NA	NA	1744	0.02379	cellular&nbsp;organisms>Bacteria>Proteobacteria>Alphaproteobacteria>Hyphomicrobiales>Phyllobacteriaceae>Mesorhizobium
Streptomyces globosus	S	68209	1932	0.02379	NA	NA	NA	NA	1932	0.02379	NA	NA	NA	NA	cellular&nbsp;organisms>Bacteria>Terrabacteria&nbsp;group>Actinobacteria>Actinomycetia>Streptomycetales>Streptomycetaceae>Streptomyces
Paenibacillus cellulositrophicus	S	562959	1881	0.02379	1405	0.009283	1881	0.008468	1767	0.02176	NA	NA	1744	0.02379	cellular&nbsp;organisms>Bacteria>Terrabacteria&nbsp;group>Firmicutes>Bacilli>Bacillales>Paenibacillaceae>Paenibacillus
Paenibacillus chitinolyticus	S	79263	1758	0.02378	NA	NA	NA	NA	1758	0.02165	NA	NA	1743	0.02378	cellular&nbsp;organisms>Bacteria>Terrabacteria&nbsp;group>Firmicutes>Bacilli>Bacillales>Paenibacillaceae>Paenibacillus
Hoeflea sp. IMCC20628	S	1620421	3598	0.02377	3598	0.02377	NA	NA	NA	NA	NA	NA	NA	NA	cellular&nbsp;organisms>Bacteria>Proteobacteria>Alphaproteobacteria>Hyphomicrobiales>Phyllobacteriaceae>Hoeflea>unclassified&nbsp;Hoeflea
Streptomyces cattleya	S	29303	1802	0.02375	NA	NA	NA	NA	1802	0.02219	NA	NA	1741	0.02375	cellular&nbsp;organisms>Bacteria>Terrabacteria&nbsp;group>Actinobacteria>Actinomycetia>Streptomycetales>Streptomycetaceae>Streptomyces
Bacillus sonorensis	S	119858	2099	0.02374	NA	NA	NA	NA	NA	NA	2099	0.02374	NA	NA	cellular&nbsp;organisms>Bacteria>Terrabacteria&nbsp;group>Firmicutes>Bacilli>Bacillales>Bacillaceae>Bacillus>Bacillus&nbsp;subtilis&nbsp;group
Desulfallas gibsoniae	S	102134	1740	0.02374	NA	NA	NA	NA	1396	0.01719	1707	0.01931	1740	0.02374	cellular&nbsp;organisms>Bacteria>Terrabacteria&nbsp;group>Firmicutes>Clostridia>Eubacteriales>Peptococcaceae>Desulfallas
Virgibacillus phasianinus	S	2017483	1927	0.02373	1144	0.007559	NA	NA	1927	0.02373	1681	0.01901	NA	NA	cellular&nbsp;organisms>Bacteria>Terrabacteria&nbsp;group>Firmicutes>Bacilli>Bacillales>Bacillaceae>Virgibacillus
Micromonospora sp. HM134	S	2583243	1926	0.02371	NA	NA	NA	NA	1926	0.02371	NA	NA	NA	NA	cellular&nbsp;organisms>Bacteria>Terrabacteria&nbsp;group>Actinobacteria>Actinomycetia>Micromonosporales>Micromonosporaceae>Micromonospora>unclassified&nbsp;Micromonospora
Polaribacter sp. ALD11	S	2058137	3881	0.0237	3587	0.0237	3881	0.01747	NA	NA	1751	0.0198	NA	NA	cellular&nbsp;organisms>Bacteria>FCB&nbsp;group>Bacteroidetes/Chlorobi&nbsp;group>Bacteroidetes>Flavobacteriia>Flavobacteriales>Flavobacteriaceae>Polaribacter>unclassified&nbsp;Polaribacter
Modestobacter marinus	S	477641	1737	0.0237	NA	NA	NA	NA	1566	0.01928	NA	NA	1737	0.0237	cellular&nbsp;organisms>Bacteria>Terrabacteria&nbsp;group>Actinobacteria>Actinomycetia>Geodermatophilales>Geodermatophilaceae>Modestobacter
Paenibacillus ihbetae	S	1870820	1737	0.0237	NA	NA	NA	NA	1712	0.02108	NA	NA	1737	0.0237	cellular&nbsp;organisms>Bacteria>Terrabacteria&nbsp;group>Firmicutes>Bacilli>Bacillales>Paenibacillaceae>Paenibacillus
Pseudodesulfovibrio cashew	S	2678688	1854	0.02368	NA	NA	NA	NA	1854	0.02283	NA	NA	1736	0.02368	cellular&nbsp;organisms>Bacteria>Proteobacteria>delta/epsilon&nbsp;subdivisions>Deltaproteobacteria>Desulfovibrionales>Desulfovibrionaceae>Pseudodesulfovibrio
Lederbergia lentus	S	1467	2186	0.02367	2186	0.01444	1112	0.005006	NA	NA	2093	0.02367	NA	NA	cellular&nbsp;organisms>Bacteria>Terrabacteria&nbsp;group>Firmicutes>Bacilli>Bacillales>Bacillaceae>Lederbergia
Sphingomonas sp. MM-1	S	745310	5250	0.02364	NA	NA	5250	0.02364	NA	NA	NA	NA	NA	NA	cellular&nbsp;organisms>Bacteria>Proteobacteria>Alphaproteobacteria>Sphingomonadales>Sphingomonadaceae>Sphingomonas>unclassified&nbsp;Sphingomonas
Luteimonas sp. MC1750	S	2799326	1920	0.02364	NA	NA	NA	NA	1920	0.02364	NA	NA	1557	0.02124	cellular&nbsp;organisms>Bacteria>Proteobacteria>Gammaproteobacteria>Xanthomonadales>Xanthomonadaceae>Luteimonas>unclassified&nbsp;Luteimonas
Chryseobacterium cucumeris	S	1813611	3573	0.02361	3573	0.02361	2706	0.01218	1495	0.01841	NA	NA	NA	NA	cellular&nbsp;organisms>Bacteria>FCB&nbsp;group>Bacteroidetes/Chlorobi&nbsp;group>Bacteroidetes>Flavobacteriia>Flavobacteriales>Weeksellaceae>Chryseobacterium&nbsp;group>Chryseobacterium
Streptomyces albulus	S	68570	1870	0.02357	NA	NA	NA	NA	1870	0.02302	NA	NA	1728	0.02357	cellular&nbsp;organisms>Bacteria>Terrabacteria&nbsp;group>Actinobacteria>Actinomycetia>Streptomycetales>Streptomycetaceae>Streptomyces
Gemmata massiliana	S	1210884	1790	0.02356	NA	NA	1755	0.007901	1790	0.02204	NA	NA	1727	0.02356	cellular&nbsp;organisms>Bacteria>PVC&nbsp;group>Planctomycetes>Planctomycetia>Gemmatales>Gemmataceae>Gemmata
Roseivirga pacifica	S	1267423	1913	0.02355	1360	0.008986	1009	0.004543	1913	0.02355	1300	0.0147	1395	0.01903	cellular&nbsp;organisms>Bacteria>FCB&nbsp;group>Bacteroidetes/Chlorobi&nbsp;group>Bacteroidetes>Cytophagia>Cytophagales>Roseivirgaceae>Roseivirga
Agromyces sp. LHK192	S	2498704	1752	0.02355	NA	NA	NA	NA	1752	0.02157	NA	NA	1726	0.02355	cellular&nbsp;organisms>Bacteria>Terrabacteria&nbsp;group>Actinobacteria>Actinomycetia>Micrococcales>Microbacteriaceae>Agromyces>unclassified&nbsp;Agromyces
Rahnella aceris	S	2703885	5226	0.02353	NA	NA	5226	0.02353	NA	NA	NA	NA	NA	NA	cellular&nbsp;organisms>Bacteria>Proteobacteria>Gammaproteobacteria>Enterobacterales>Yersiniaceae>Rahnella
Nocardia sp. WCH-YHL-001	S	2755382	1725	0.02353	NA	NA	1387	0.006244	1498	0.01844	NA	NA	1725	0.02353	cellular&nbsp;organisms>Bacteria>Terrabacteria&nbsp;group>Actinobacteria>Actinomycetia>Corynebacteriales>Nocardiaceae>Nocardia>unclassified&nbsp;Nocardia
Veillonella rodentium	S	248315	1725	0.02353	NA	NA	NA	NA	NA	NA	1516	0.01715	1725	0.02353	cellular&nbsp;organisms>Bacteria>Terrabacteria&nbsp;group>Firmicutes>Negativicutes>Veillonellales>Veillonellaceae>Veillonella
Galbibacter sp. BG1	S	1170699	3557	0.0235	3557	0.0235	2364	0.01064	NA	NA	1644	0.01859	NA	NA	cellular&nbsp;organisms>Bacteria>FCB&nbsp;group>Bacteroidetes/Chlorobi&nbsp;group>Bacteroidetes>Flavobacteriia>Flavobacteriales>Flavobacteriaceae>Galbibacter>unclassified&nbsp;Galbibacter
Desulfosporosinus acidiphilus	S	885581	2078	0.0235	NA	NA	NA	NA	1091	0.01343	2078	0.0235	1597	0.02179	cellular&nbsp;organisms>Bacteria>Terrabacteria&nbsp;group>Firmicutes>Clostridia>Eubacteriales>Peptococcaceae>Desulfosporosinus
Spirosoma sp. PL0136	S	2710596	2064	0.02349	NA	NA	NA	NA	1908	0.02349	2064	0.02334	1355	0.01849	cellular&nbsp;organisms>Bacteria>FCB&nbsp;group>Bacteroidetes/Chlorobi&nbsp;group>Bacteroidetes>Cytophagia>Cytophagales>Cytophagaceae>Spirosoma>unclassified&nbsp;Spirosoma
Youhaiella tibetensis	S	1447062	1908	0.02349	NA	NA	NA	NA	1908	0.02349	NA	NA	NA	NA	cellular&nbsp;organisms>Bacteria>Proteobacteria>Alphaproteobacteria>Hyphomicrobiales>Hyphomicrobiaceae>Youhaiella
Luteibacter pinisoli	S	2589080	1721	0.02348	NA	NA	NA	NA	1452	0.01788	NA	NA	1721	0.02348	cellular&nbsp;organisms>Bacteria>Proteobacteria>Gammaproteobacteria>Xanthomonadales>Rhodanobacteraceae>Luteibacter
Streptomyces roseochromogenus	S	285450	1907	0.02348	NA	NA	NA	NA	1907	0.02348	NA	NA	1582	0.02158	cellular&nbsp;organisms>Bacteria>Terrabacteria&nbsp;group>Actinobacteria>Actinomycetia>Streptomycetales>Streptomycetaceae>Streptomyces
Paraoceanicella profunda	S	2579971	1720	0.02346	NA	NA	NA	NA	1614	0.01987	NA	NA	1720	0.02346	cellular&nbsp;organisms>Bacteria>Proteobacteria>Alphaproteobacteria>Rhodobacterales>Rhodobacteraceae>Paraoceanicella
Staphylococcus saccharolyticus	S	33028	2072	0.02343	NA	NA	NA	NA	NA	NA	2072	0.02343	NA	NA	cellular&nbsp;organisms>Bacteria>Terrabacteria&nbsp;group>Firmicutes>Bacilli>Bacillales>Staphylococcaceae>Staphylococcus
Desulfatibacillum aliphaticivorans	S	218208	1717	0.02342	NA	NA	NA	NA	1656	0.02039	NA	NA	1717	0.02342	cellular&nbsp;organisms>Bacteria>Proteobacteria>delta/epsilon&nbsp;subdivisions>Deltaproteobacteria>Desulfobacterales>Desulfobacteraceae>Desulfatibacillum
Paenibacillus barcinonensis	S	198119	2071	0.02342	1119	0.007394	NA	NA	NA	NA	2071	0.02342	1316	0.01795	cellular&nbsp;organisms>Bacteria>Terrabacteria&nbsp;group>Firmicutes>Bacilli>Bacillales>Paenibacillaceae>Paenibacillus
Brachyspira hampsonii	S	1287055	2070	0.02341	NA	NA	NA	NA	NA	NA	2070	0.02341	NA	NA	cellular&nbsp;organisms>Bacteria>Spirochaetes>Spirochaetia>Brachyspirales>Brachyspiraceae>Brachyspira
Lancefieldella parvula	S	1382	1894	0.02341	NA	NA	NA	NA	1364	0.01679	1894	0.02142	1716	0.02341	cellular&nbsp;organisms>Bacteria>Terrabacteria&nbsp;group>Actinobacteria>Coriobacteriia>Coriobacteriales>Atopobiaceae>Lancefieldella
Mycoplasma iowae	S	2116	2070	0.02341	NA	NA	NA	NA	NA	NA	2070	0.02341	NA	NA	cellular&nbsp;organisms>Bacteria>Terrabacteria&nbsp;group>Tenericutes>Mollicutes>Mycoplasmatales>Mycoplasmataceae>Mycoplasma
Tsukamurella tyrosinosolvens	S	57704	1714	0.02338	NA	NA	NA	NA	1530	0.01884	NA	NA	1714	0.02338	cellular&nbsp;organisms>Bacteria>Terrabacteria&nbsp;group>Actinobacteria>Actinomycetia>Corynebacteriales>Tsukamurellaceae>Tsukamurella
Lactiplantibacillus pentosus	S	1589	2067	0.02338	NA	NA	NA	NA	NA	NA	2067	0.02338	1255	0.01712	cellular&nbsp;organisms>Bacteria>Terrabacteria&nbsp;group>Firmicutes>Bacilli>Lactobacillales>Lactobacillaceae>Lactiplantibacillus
Pseudolabrys taiwanensis	S	331696	1713	0.02337	NA	NA	NA	NA	1682	0.02071	NA	NA	1713	0.02337	cellular&nbsp;organisms>Bacteria>Proteobacteria>Alphaproteobacteria>Hyphomicrobiales>Xanthobacteraceae>Pseudolabrys
Roseococcus sp. NIBR12	S	2771361	1713	0.02337	NA	NA	1611	0.007253	1583	0.01949	NA	NA	1713	0.02337	cellular&nbsp;organisms>Bacteria>Proteobacteria>Alphaproteobacteria>Rhodospirillales>Acetobacteraceae>Roseococcus>unclassified&nbsp;Roseococcus
Hymenobacter sp. BRD67	S	2675877	3534	0.02335	3534	0.02335	NA	NA	1589	0.01956	NA	NA	NA	NA	cellular&nbsp;organisms>Bacteria>FCB&nbsp;group>Bacteroidetes/Chlorobi&nbsp;group>Bacteroidetes>Cytophagia>Cytophagales>Hymenobacteraceae>Hymenobacter>unclassified&nbsp;Hymenobacter
Syntrophobacter fumaroxidans	S	119484	1896	0.02334	NA	NA	NA	NA	1896	0.02334	NA	NA	1674	0.02284	cellular&nbsp;organisms>Bacteria>Proteobacteria>delta/epsilon&nbsp;subdivisions>Deltaproteobacteria>Syntrophobacterales>Syntrophobacteraceae>Syntrophobacter
Sulfurifustis variabilis	S	1675686	1711	0.02334	NA	NA	1270	0.005718	1622	0.01997	NA	NA	1711	0.02334	cellular&nbsp;organisms>Bacteria>Proteobacteria>Gammaproteobacteria>Acidiferrobacterales>Acidiferrobacteraceae>Sulfurifustis
Ligilactobacillus ruminis	S	1623	2064	0.02334	NA	NA	NA	NA	1381	0.017	2064	0.02334	1518	0.02071	cellular&nbsp;organisms>Bacteria>Terrabacteria&nbsp;group>Firmicutes>Bacilli>Lactobacillales>Lactobacillaceae>Ligilactobacillus
Streptococcus sp. oral taxon 431	S	712633	2064	0.02334	NA	NA	NA	NA	NA	NA	2064	0.02334	NA	NA	cellular&nbsp;organisms>Bacteria>Terrabacteria&nbsp;group>Firmicutes>Bacilli>Lactobacillales>Streptococcaceae>Streptococcus>unclassified&nbsp;Streptococcus
Streptomyces avermitilis	S	33903	1710	0.02333	NA	NA	NA	NA	1697	0.02089	NA	NA	1710	0.02333	cellular&nbsp;organisms>Bacteria>Terrabacteria&nbsp;group>Actinobacteria>Actinomycetia>Streptomycetales>Streptomycetaceae>Streptomyces
Gimesia aquarii	S	2527964	2061	0.02331	NA	NA	NA	NA	NA	NA	2061	0.02331	NA	NA	cellular&nbsp;organisms>Bacteria>PVC&nbsp;group>Planctomycetes>Planctomycetia>Planctomycetales>Planctomycetaceae>Gimesia
Isoptericola dokdonensis	S	372663	1893	0.02331	NA	NA	NA	NA	1893	0.02331	NA	NA	1525	0.0208	cellular&nbsp;organisms>Bacteria>Terrabacteria&nbsp;group>Actinobacteria>Actinomycetia>Micrococcales>Promicromonosporaceae>Isoptericola
Polaribacter haliotis	S	1888915	4335	0.0233	3527	0.0233	4335	0.01952	NA	NA	1351	0.01528	NA	NA	cellular&nbsp;organisms>Bacteria>FCB&nbsp;group>Bacteroidetes/Chlorobi&nbsp;group>Bacteroidetes>Flavobacteriia>Flavobacteriales>Flavobacteriaceae>Polaribacter
Pseudonocardia sp. CGMCC 4.1532	S	2761535	1708	0.0233	NA	NA	1491	0.006712	1634	0.02012	NA	NA	1708	0.0233	cellular&nbsp;organisms>Bacteria>Terrabacteria&nbsp;group>Actinobacteria>Actinomycetia>Pseudonocardiales>Pseudonocardiaceae>Pseudonocardia>unclassified&nbsp;Pseudonocardia
Massilia sp. LPB0304	S	2769491	2372	0.02326	2372	0.01567	NA	NA	NA	NA	NA	NA	1705	0.02326	cellular&nbsp;organisms>Bacteria>Proteobacteria>Betaproteobacteria>Burkholderiales>Oxalobacteraceae>Massilia>unclassified&nbsp;Massilia
Cellulosimicrobium sp. BI34T	S	2587808	1705	0.02326	NA	NA	NA	NA	1673	0.0206	NA	NA	1705	0.02326	cellular&nbsp;organisms>Bacteria>Terrabacteria&nbsp;group>Actinobacteria>Actinomycetia>Micrococcales>Promicromonosporaceae>Cellulosimicrobium>unclassified&nbsp;Cellulosimicrobium
Halanaerobium praevalens	S	2331	2057	0.02326	NA	NA	NA	NA	1139	0.01402	2057	0.02326	1297	0.01769	cellular&nbsp;organisms>Bacteria>Terrabacteria&nbsp;group>Firmicutes>Clostridia>Halanaerobiales>Halanaerobiaceae>Halanaerobium
Flavobacterium commune	S	1306519	4591	0.02325	2729	0.01803	4591	0.02067	1409	0.01735	2056	0.02325	NA	NA	cellular&nbsp;organisms>Bacteria>FCB&nbsp;group>Bacteroidetes/Chlorobi&nbsp;group>Bacteroidetes>Flavobacteriia>Flavobacteriales>Flavobacteriaceae>Flavobacterium
Luteimicrobium xylanilyticum	S	1133546	1888	0.02325	NA	NA	NA	NA	1888	0.02325	NA	NA	1588	0.02166	cellular&nbsp;organisms>Bacteria>Terrabacteria&nbsp;group>Actinobacteria>Actinomycetia>Micrococcales>Micrococcales&nbsp;incertae&nbsp;sedis>Luteimicrobium
Euzebya sp. DY32-46	S	1608957	1778	0.02323	NA	NA	1361	0.006127	1778	0.02189	NA	NA	1703	0.02323	cellular&nbsp;organisms>Bacteria>Terrabacteria&nbsp;group>Actinobacteria>Nitriliruptoria>Euzebyales>Euzebyaceae>Euzebya>unclassified&nbsp;Euzebya
Mycolicibacterium smegmatis	S	1772	1886	0.02322	NA	NA	NA	NA	1886	0.02322	NA	NA	1509	0.02059	cellular&nbsp;organisms>Bacteria>Terrabacteria&nbsp;group>Actinobacteria>Actinomycetia>Corynebacteriales>Mycobacteriaceae>Mycolicibacterium
Apilactobacillus kunkeei	S	148814	2053	0.02322	NA	NA	NA	NA	NA	NA	2053	0.02322	NA	NA	cellular&nbsp;organisms>Bacteria>Terrabacteria&nbsp;group>Firmicutes>Bacilli>Lactobacillales>Lactobacillaceae>Apilactobacillus
Salegentibacter salegens	S	143223	2052	0.02321	1614	0.01066	1607	0.007235	NA	NA	2052	0.02321	NA	NA	cellular&nbsp;organisms>Bacteria>FCB&nbsp;group>Bacteroidetes/Chlorobi&nbsp;group>Bacteroidetes>Flavobacteriia>Flavobacteriales>Flavobacteriaceae>Salegentibacter
Hypericibacter adhaerens	S	2602016	1885	0.02321	NA	NA	NA	NA	1885	0.02321	NA	NA	1519	0.02072	cellular&nbsp;organisms>Bacteria>Proteobacteria>Alphaproteobacteria>Rhodospirillales>Rhodospirillaceae>Hypericibacter
Desulfosarcina widdelii	S	947919	1701	0.02321	NA	NA	NA	NA	1507	0.01856	NA	NA	1701	0.02321	cellular&nbsp;organisms>Bacteria>Proteobacteria>delta/epsilon&nbsp;subdivisions>Deltaproteobacteria>Desulfobacterales>Desulfobacteraceae>Desulfosarcina
Pseudodesulfovibrio sp. zrk46	S	2725288	1701	0.02321	NA	NA	NA	NA	1574	0.01938	NA	NA	1701	0.02321	cellular&nbsp;organisms>Bacteria>Proteobacteria>delta/epsilon&nbsp;subdivisions>Deltaproteobacteria>Desulfovibrionales>Desulfovibrionaceae>Pseudodesulfovibrio>unclassified&nbsp;Pseudodesulfovibrio
Streptomyces kanamyceticus	S	1967	1884	0.0232	NA	NA	NA	NA	1884	0.0232	NA	NA	NA	NA	cellular&nbsp;organisms>Bacteria>Terrabacteria&nbsp;group>Actinobacteria>Actinomycetia>Streptomycetales>Streptomycetaceae>Streptomyces
Gimesia panareensis	S	2527978	1699	0.02318	NA	NA	NA	NA	1408	0.01734	NA	NA	1699	0.02318	cellular&nbsp;organisms>Bacteria>PVC&nbsp;group>Planctomycetes>Planctomycetia>Planctomycetales>Planctomycetaceae>Gimesia
Streptococcus pluranimalium	S	82348	2049	0.02317	NA	NA	NA	NA	NA	NA	2049	0.02317	NA	NA	cellular&nbsp;organisms>Bacteria>Terrabacteria&nbsp;group>Firmicutes>Bacilli>Lactobacillales>Streptococcaceae>Streptococcus
Chlorobaculum parvum	S	274539	1698	0.02316	NA	NA	NA	NA	1512	0.01862	NA	NA	1698	0.02316	cellular&nbsp;organisms>Bacteria>FCB&nbsp;group>Bacteroidetes/Chlorobi&nbsp;group>Chlorobi>Chlorobia>Chlorobiales>Chlorobiaceae>Chlorobaculum
Streptomyces ficellus	S	1977088	1880	0.02315	NA	NA	NA	NA	1880	0.02315	NA	NA	NA	NA	cellular&nbsp;organisms>Bacteria>Terrabacteria&nbsp;group>Actinobacteria>Actinomycetia>Streptomycetales>Streptomycetaceae>Streptomyces
Echinicola strongylocentroti	S	1795355	1878	0.02312	NA	NA	NA	NA	1878	0.02312	1660	0.01877	1677	0.02288	cellular&nbsp;organisms>Bacteria>FCB&nbsp;group>Bacteroidetes/Chlorobi&nbsp;group>Bacteroidetes>Cytophagia>Cytophagales>Cyclobacteriaceae>Echinicola
Bacillus pseudomycoides	S	64104	3359	0.02312	3359	0.02219	1952	0.008788	1558	0.01918	2044	0.02312	1249	0.01704	cellular&nbsp;organisms>Bacteria>Terrabacteria&nbsp;group>Firmicutes>Bacilli>Bacillales>Bacillaceae>Bacillus>Bacillus&nbsp;cereus&nbsp;group
Paenibacillus sp. PAMC21692	S	2762320	1694	0.02311	1089	0.007195	1121	0.005047	1592	0.0196	1108	0.01253	1694	0.02311	cellular&nbsp;organisms>Bacteria>Terrabacteria&nbsp;group>Firmicutes>Bacilli>Bacillales>Paenibacillaceae>Paenibacillus>unclassified&nbsp;Paenibacillus
Phytohabitans flavus	S	1076124	1876	0.0231	NA	NA	1373	0.006181	1876	0.0231	NA	NA	1664	0.0227	cellular&nbsp;organisms>Bacteria>Terrabacteria&nbsp;group>Actinobacteria>Actinomycetia>Micromonosporales>Micromonosporaceae>Phytohabitans
Winogradskyella schleiferi	S	2686078	3487	0.02304	3487	0.02304	3323	0.01496	NA	NA	NA	NA	NA	NA	cellular&nbsp;organisms>Bacteria>FCB&nbsp;group>Bacteroidetes/Chlorobi&nbsp;group>Bacteroidetes>Flavobacteriia>Flavobacteriales>Flavobacteriaceae>Winogradskyella
Sulfurimonas sp. H1576	S	2672570	2036	0.02303	NA	NA	NA	NA	NA	NA	2036	0.02303	NA	NA	cellular&nbsp;organisms>Bacteria>Proteobacteria>delta/epsilon&nbsp;subdivisions>Epsilonproteobacteria>Campylobacterales>Thiovulaceae>Sulfurimonas>unclassified&nbsp;Sulfurimonas
Leuconostoc citreum	S	33964	3484	0.02302	3484	0.02302	NA	NA	NA	NA	NA	NA	NA	NA	cellular&nbsp;organisms>Bacteria>Terrabacteria&nbsp;group>Firmicutes>Bacilli>Lactobacillales>Lactobacillaceae>Leuconostoc
Bradyrhizobium sp. CCBAU 53421	S	1325120	1868	0.023	NA	NA	NA	NA	1868	0.023	NA	NA	NA	NA	cellular&nbsp;organisms>Bacteria>Proteobacteria>Alphaproteobacteria>Hyphomicrobiales>Bradyrhizobiaceae>Bradyrhizobium>unclassified&nbsp;Bradyrhizobium
Sediminispirochaeta smaragdinae	S	55206	1783	0.02297	1160	0.007664	NA	NA	1783	0.02195	1244	0.01407	1684	0.02297	cellular&nbsp;organisms>Bacteria>Spirochaetes>Spirochaetia>Spirochaetales>Spirochaetaceae>Sediminispirochaeta
Paenibacillus rhizovicinus	S	2704463	1848	0.02297	NA	NA	1093	0.004921	1848	0.02275	NA	NA	1684	0.02297	cellular&nbsp;organisms>Bacteria>Terrabacteria&nbsp;group>Firmicutes>Bacilli>Bacillales>Paenibacillaceae>Paenibacillus
Planococcus versutus	S	1302659	3476	0.02297	3476	0.02297	2226	0.01002	NA	NA	1984	0.02244	NA	NA	cellular&nbsp;organisms>Bacteria>Terrabacteria&nbsp;group>Firmicutes>Bacilli>Bacillales>Planococcaceae>Planococcus
Mucilaginibacter xinganensis	S	1234841	1682	0.02295	NA	NA	NA	NA	1442	0.01775	1605	0.01815	1682	0.02295	cellular&nbsp;organisms>Bacteria>FCB&nbsp;group>Bacteroidetes/Chlorobi&nbsp;group>Bacteroidetes>Sphingobacteriia>Sphingobacteriales>Sphingobacteriaceae>Mucilaginibacter
Alkalihalobacillus krulwichiae	S	199441	2529	0.02295	2529	0.01671	1682	0.007572	1395	0.01718	2029	0.02295	NA	NA	cellular&nbsp;organisms>Bacteria>Terrabacteria&nbsp;group>Firmicutes>Bacilli>Bacillales>Bacillaceae>Alkalihalobacillus
Algibacter sp. L3A6	S	2686366	3585	0.02294	3472	0.02294	3585	0.01614	NA	NA	1654	0.01871	NA	NA	cellular&nbsp;organisms>Bacteria>FCB&nbsp;group>Bacteroidetes/Chlorobi&nbsp;group>Bacteroidetes>Flavobacteriia>Flavobacteriales>Flavobacteriaceae>Algibacter>unclassified&nbsp;Algibacter
Gramella forsetii	S	411153	2028	0.02294	1324	0.008748	1551	0.006983	1420	0.01748	2028	0.02294	NA	NA	cellular&nbsp;organisms>Bacteria>FCB&nbsp;group>Bacteroidetes/Chlorobi&nbsp;group>Bacteroidetes>Flavobacteriia>Flavobacteriales>Flavobacteriaceae>Gramella
Sphingomonas alpina	S	653931	3345	0.02294	3345	0.0221	1308	0.005889	1863	0.02294	NA	NA	1651	0.02252	cellular&nbsp;organisms>Bacteria>Proteobacteria>Alphaproteobacteria>Sphingomonadales>Sphingomonadaceae>Sphingomonas
Nonlabens sp. Hel1_33_55	S	1336802	1862	0.02293	1140	0.007532	1592	0.007167	1862	0.02293	NA	NA	NA	NA	cellular&nbsp;organisms>Bacteria>FCB&nbsp;group>Bacteroidetes/Chlorobi&nbsp;group>Bacteroidetes>Flavobacteriia>Flavobacteriales>Flavobacteriaceae>Nonlabens>unclassified&nbsp;Nonlabens
Pelodictyon luteolum	S	1100	1679	0.02291	NA	NA	NA	NA	1590	0.01958	NA	NA	1679	0.02291	cellular&nbsp;organisms>Bacteria>FCB&nbsp;group>Bacteroidetes/Chlorobi&nbsp;group>Chlorobi>Chlorobia>Chlorobiales>Chlorobiaceae>Chlorobium/Pelodictyon&nbsp;group>Pelodictyon
Martelella endophytica	S	1486262	1860	0.0229	NA	NA	NA	NA	1860	0.0229	NA	NA	1390	0.01896	cellular&nbsp;organisms>Bacteria>Proteobacteria>Alphaproteobacteria>Hyphomicrobiales>Aurantimonadaceae>Martelella
Cellulomonas fimi	S	1708	1860	0.0229	NA	NA	NA	NA	1860	0.0229	NA	NA	NA	NA	cellular&nbsp;organisms>Bacteria>Terrabacteria&nbsp;group>Actinobacteria>Actinomycetia>Micrococcales>Cellulomonadaceae>Cellulomonas
Paucilactobacillus nenjiangensis	S	1296540	2025	0.0229	NA	NA	NA	NA	NA	NA	2025	0.0229	NA	NA	cellular&nbsp;organisms>Bacteria>Terrabacteria&nbsp;group>Firmicutes>Bacilli>Lactobacillales>Lactobacillaceae>Paucilactobacillus
Croceibacter atlanticus	S	313588	3494	0.02289	3465	0.02289	3494	0.01573	1346	0.01657	NA	NA	NA	NA	cellular&nbsp;organisms>Bacteria>FCB&nbsp;group>Bacteroidetes/Chlorobi&nbsp;group>Bacteroidetes>Flavobacteriia>Flavobacteriales>Flavobacteriaceae>Croceibacter
Streptomyces gilvosporeus	S	553510	1774	0.02289	NA	NA	NA	NA	1774	0.02184	NA	NA	1678	0.02289	cellular&nbsp;organisms>Bacteria>Terrabacteria&nbsp;group>Actinobacteria>Actinomycetia>Streptomycetales>Streptomycetaceae>Streptomyces
Streptomyces aureoverticillatus	S	66871	1852	0.02286	NA	NA	NA	NA	1852	0.0228	NA	NA	1676	0.02286	cellular&nbsp;organisms>Bacteria>Terrabacteria&nbsp;group>Actinobacteria>Actinomycetia>Streptomycetales>Streptomycetaceae>Streptomyces
Staphylococcus simiae	S	308354	2020	0.02285	1777	0.01174	1405	0.006325	1365	0.01681	2020	0.02285	1335	0.01821	cellular&nbsp;organisms>Bacteria>Terrabacteria&nbsp;group>Firmicutes>Bacilli>Bacillales>Staphylococcaceae>Staphylococcus
Bacillus methanolicus	S	1471	2019	0.02283	1708	0.01129	1134	0.005105	NA	NA	2019	0.02283	NA	NA	cellular&nbsp;organisms>Bacteria>Terrabacteria&nbsp;group>Firmicutes>Bacilli>Bacillales>Bacillaceae>Bacillus
Thermaerobacter sp. FW80	S	2546351	1672	0.02281	NA	NA	NA	NA	1480	0.01822	NA	NA	1672	0.02281	cellular&nbsp;organisms>Bacteria>Terrabacteria&nbsp;group>Firmicutes>Clostridia>Eubacteriales>Eubacteriales&nbsp;incertae&nbsp;sedis>Clostridiales&nbsp;Family&nbsp;XVII.&nbsp;Incertae&nbsp;Sedis>Thermaerobacter>unclassified&nbsp;Thermaerobacter
Methylomusa anaerophila	S	1930071	1671	0.0228	NA	NA	NA	NA	1278	0.01574	1494	0.0169	1671	0.0228	cellular&nbsp;organisms>Bacteria>Terrabacteria&nbsp;group>Firmicutes>Negativicutes>Selenomonadales>Sporomusaceae>Methylomusa
Paenibacillus thiaminolyticus	S	49283	1851	0.02279	1241	0.0082	1119	0.005038	1851	0.02279	NA	NA	1613	0.022	cellular&nbsp;organisms>Bacteria>Terrabacteria&nbsp;group>Firmicutes>Bacilli>Bacillales>Paenibacillaceae>Paenibacillus
Mucilaginibacter mallensis	S	652787	1952	0.02277	1597	0.01055	1370	0.006168	1849	0.02277	1952	0.02208	1553	0.02119	cellular&nbsp;organisms>Bacteria>FCB&nbsp;group>Bacteroidetes/Chlorobi&nbsp;group>Bacteroidetes>Sphingobacteriia>Sphingobacteriales>Sphingobacteriaceae>Mucilaginibacter
Enterococcus mundtii	S	53346	2253	0.02275	1801	0.0119	2253	0.01014	1535	0.0189	2012	0.02275	1235	0.01685	cellular&nbsp;organisms>Bacteria>Terrabacteria&nbsp;group>Firmicutes>Bacilli>Lactobacillales>Enterococcaceae>Enterococcus
Maridesulfovibrio salexigens	S	880	1902	0.02274	NA	NA	NA	NA	1602	0.01972	1902	0.02151	1667	0.02274	cellular&nbsp;organisms>Bacteria>Proteobacteria>delta/epsilon&nbsp;subdivisions>Deltaproteobacteria>Desulfovibrionales>Desulfovibrionaceae>Maridesulfovibrio
Nocardia wallacei	S	480035	1834	0.02274	NA	NA	1472	0.006627	1834	0.02258	NA	NA	1667	0.02274	cellular&nbsp;organisms>Bacteria>Terrabacteria&nbsp;group>Actinobacteria>Actinomycetia>Corynebacteriales>Nocardiaceae>Nocardia
Nocardioides sp. JS614	S	196162	2069	0.02274	NA	NA	2069	0.009315	1673	0.0206	NA	NA	1667	0.02274	cellular&nbsp;organisms>Bacteria>Terrabacteria&nbsp;group>Actinobacteria>Actinomycetia>Propionibacteriales>Nocardioidaceae>Nocardioides>unclassified&nbsp;Nocardioides
Mucilaginibacter sp. 14171R-50	S	2703789	2010	0.02273	NA	NA	NA	NA	1748	0.02152	2010	0.02273	1142	0.01558	cellular&nbsp;organisms>Bacteria>FCB&nbsp;group>Bacteroidetes/Chlorobi&nbsp;group>Bacteroidetes>Sphingobacteriia>Sphingobacteriales>Sphingobacteriaceae>Mucilaginibacter>unclassified&nbsp;Mucilaginibacter
Mycoplasma gallinaceum	S	29556	3440	0.02273	3440	0.02273	NA	NA	NA	NA	NA	NA	NA	NA	cellular&nbsp;organisms>Bacteria>Terrabacteria&nbsp;group>Tenericutes>Mollicutes>Mycoplasmatales>Mycoplasmataceae>Mycoplasmopsis
Lysobacter capsici	S	435897	1665	0.02271	NA	NA	NA	NA	1488	0.01832	NA	NA	1665	0.02271	cellular&nbsp;organisms>Bacteria>Proteobacteria>Gammaproteobacteria>Xanthomonadales>Xanthomonadaceae>Lysobacter
Rhodococcus sp. P1Y	S	1302308	1665	0.02271	NA	NA	NA	NA	NA	NA	NA	NA	1665	0.02271	cellular&nbsp;organisms>Bacteria>Terrabacteria&nbsp;group>Actinobacteria>Actinomycetia>Corynebacteriales>Nocardiaceae>Rhodococcus>unclassified&nbsp;Rhodococcus
Dermacoccus nishinomiyaensis	S	1274	1843	0.02269	NA	NA	NA	NA	1843	0.02269	NA	NA	NA	NA	cellular&nbsp;organisms>Bacteria>Terrabacteria&nbsp;group>Actinobacteria>Actinomycetia>Micrococcales>Dermacoccaceae>Dermacoccus
Nitrospirillum amazonense	S	28077	1776	0.02267	1494	0.009871	1365	0.006145	1776	0.02187	NA	NA	1662	0.02267	cellular&nbsp;organisms>Bacteria>Proteobacteria>Alphaproteobacteria>Rhodospirillales>Rhodospirillaceae>Nitrospirillum
Polaribacter sp. G4M1	S	2808900	1840	0.02266	1702	0.01125	1801	0.008108	1840	0.02266	1535	0.01736	NA	NA	cellular&nbsp;organisms>Bacteria>FCB&nbsp;group>Bacteroidetes/Chlorobi&nbsp;group>Bacteroidetes>Flavobacteriia>Flavobacteriales>Flavobacteriaceae>Polaribacter>unclassified&nbsp;Polaribacter
Mycolicibacterium mageritense	S	53462	1840	0.02266	NA	NA	NA	NA	1840	0.02266	NA	NA	1632	0.02226	cellular&nbsp;organisms>Bacteria>Terrabacteria&nbsp;group>Actinobacteria>Actinomycetia>Corynebacteriales>Mycobacteriaceae>Mycolicibacterium
Geoalkalibacter subterraneus	S	483547	1796	0.02265	NA	NA	NA	NA	1796	0.02211	NA	NA	1660	0.02265	cellular&nbsp;organisms>Bacteria>Proteobacteria>delta/epsilon&nbsp;subdivisions>Deltaproteobacteria>Desulfuromonadales>Geobacteraceae>Geoalkalibacter
Bacillus glycinifermentans	S	1664069	1660	0.02265	1169	0.007724	NA	NA	1512	0.01862	NA	NA	1660	0.02265	cellular&nbsp;organisms>Bacteria>Terrabacteria&nbsp;group>Firmicutes>Bacilli>Bacillales>Bacillaceae>Bacillus
Algibacter sp. L1A34	S	2686365	3635	0.02263	3425	0.02263	3635	0.01636	NA	NA	NA	NA	NA	NA	cellular&nbsp;organisms>Bacteria>FCB&nbsp;group>Bacteroidetes/Chlorobi&nbsp;group>Bacteroidetes>Flavobacteriia>Flavobacteriales>Flavobacteriaceae>Algibacter>unclassified&nbsp;Algibacter
Fischerella sp. NIES-4106	S	2005456	2164	0.02263	NA	NA	2164	0.009742	1838	0.02263	NA	NA	NA	NA	cellular&nbsp;organisms>Bacteria>Terrabacteria&nbsp;group>Cyanobacteria/Melainabacteria&nbsp;group>Cyanobacteria>Nostocales>Hapalosiphonaceae>Fischerella>unclassified&nbsp;Fischerella
Gramella flava	S	1486245	2359	0.02262	2359	0.01559	1868	0.00841	1837	0.02262	1958	0.02214	NA	NA	cellular&nbsp;organisms>Bacteria>FCB&nbsp;group>Bacteroidetes/Chlorobi&nbsp;group>Bacteroidetes>Flavobacteriia>Flavobacteriales>Flavobacteriaceae>Gramella
Chelatococcus sp. CO-6	S	1702325	1658	0.02262	NA	NA	NA	NA	1641	0.0202	NA	NA	1658	0.02262	cellular&nbsp;organisms>Bacteria>Proteobacteria>Alphaproteobacteria>Hyphomicrobiales>Chelatococcaceae>Chelatococcus>unclassified&nbsp;Chelatococcus
Desulfobulbus propionicus	S	894	1721	0.02261	NA	NA	1172	0.005276	1721	0.02119	NA	NA	1657	0.02261	cellular&nbsp;organisms>Bacteria>Proteobacteria>delta/epsilon&nbsp;subdivisions>Deltaproteobacteria>Desulfobacterales>Desulfobulbaceae>Desulfobulbus
Mycobacterium dioxanotrophicus	S	482462	1836	0.02261	NA	NA	NA	NA	1836	0.02261	NA	NA	NA	NA	cellular&nbsp;organisms>Bacteria>Terrabacteria&nbsp;group>Actinobacteria>Actinomycetia>Corynebacteriales>Mycobacteriaceae>Mycobacterium
Streptomyces griseocarneus	S	51201	1656	0.02259	NA	NA	NA	NA	1650	0.02032	NA	NA	1656	0.02259	cellular&nbsp;organisms>Bacteria>Terrabacteria&nbsp;group>Actinobacteria>Actinomycetia>Streptomycetales>Streptomycetaceae>Streptomyces
Fulvivirga sp. S481	S	2810512	2217	0.02257	2217	0.01465	1572	0.007077	1726	0.02125	1996	0.02257	1534	0.02093	cellular&nbsp;organisms>Bacteria>FCB&nbsp;group>Bacteroidetes/Chlorobi&nbsp;group>Bacteroidetes>Cytophagia>Cytophagales>Fulvivirgaceae>Fulvivirga>unclassified&nbsp;Fulvivirga
Nonlabens sp. SY33080	S	2719911	3415	0.02256	3415	0.02256	NA	NA	NA	NA	NA	NA	NA	NA	cellular&nbsp;organisms>Bacteria>FCB&nbsp;group>Bacteroidetes/Chlorobi&nbsp;group>Bacteroidetes>Flavobacteriia>Flavobacteriales>Flavobacteriaceae>Nonlabens>unclassified&nbsp;Nonlabens
Lacipirellula parvula	S	2650471	1777	0.02256	NA	NA	1186	0.005339	1777	0.02188	NA	NA	1654	0.02256	cellular&nbsp;organisms>Bacteria>PVC&nbsp;group>Planctomycetes>Planctomycetia>Pirellulales>Lacipirellulaceae>Lacipirellula
Marichromatium purpuratum	S	37487	1653	0.02255	NA	NA	NA	NA	1573	0.01937	NA	NA	1653	0.02255	cellular&nbsp;organisms>Bacteria>Proteobacteria>Gammaproteobacteria>Chromatiales>Chromatiaceae>Marichromatium
Paraliobacillus zengyii	S	2213194	1994	0.02255	1688	0.01115	NA	NA	1376	0.01694	1994	0.02255	1346	0.01836	cellular&nbsp;organisms>Bacteria>Terrabacteria&nbsp;group>Firmicutes>Bacilli>Bacillales>Bacillaceae>Paraliobacillus
Chryseobacterium sp. cx-624	S	2758037	2767	0.02254	2767	0.01828	2269	0.01022	1831	0.02254	NA	NA	1322	0.01804	cellular&nbsp;organisms>Bacteria>FCB&nbsp;group>Bacteroidetes/Chlorobi&nbsp;group>Bacteroidetes>Flavobacteriia>Flavobacteriales>Weeksellaceae>Chryseobacterium&nbsp;group>Chryseobacterium>unclassified&nbsp;Chryseobacterium
Erysipelothrix sp. HDW6B	S	2714929	1830	0.02253	1310	0.008656	NA	NA	1830	0.02253	1648	0.01864	1339	0.01827	cellular&nbsp;organisms>Bacteria>Terrabacteria&nbsp;group>Firmicutes>Erysipelotrichia>Erysipelotrichales>Erysipelotrichaceae>Erysipelothrix>unclassified&nbsp;Erysipelothrix
Spirosoma radiotolerans	S	1379870	1889	0.02252	NA	NA	NA	NA	1829	0.02252	1889	0.02136	1484	0.02025	cellular&nbsp;organisms>Bacteria>FCB&nbsp;group>Bacteroidetes/Chlorobi&nbsp;group>Bacteroidetes>Cytophagia>Cytophagales>Cytophagaceae>Spirosoma
Aquimarina sp. AD1	S	1714848	3773	0.0225	3405	0.0225	3773	0.01699	1116	0.01374	1824	0.02063	NA	NA	cellular&nbsp;organisms>Bacteria>FCB&nbsp;group>Bacteroidetes/Chlorobi&nbsp;group>Bacteroidetes>Flavobacteriia>Flavobacteriales>Flavobacteriaceae>Aquimarina>unclassified&nbsp;Aquimarina
Nocardioides sp. HDW12B	S	2714939	1713	0.0225	NA	NA	NA	NA	1713	0.02109	NA	NA	1649	0.0225	cellular&nbsp;organisms>Bacteria>Terrabacteria&nbsp;group>Actinobacteria>Actinomycetia>Propionibacteriales>Nocardioidaceae>Nocardioides>unclassified&nbsp;Nocardioides
Sphingobacterium hotanense	S	649196	2347	0.02248	2139	0.01413	2347	0.01057	1826	0.02248	1203	0.01361	1503	0.0205	cellular&nbsp;organisms>Bacteria>FCB&nbsp;group>Bacteroidetes/Chlorobi&nbsp;group>Bacteroidetes>Sphingobacteriia>Sphingobacteriales>Sphingobacteriaceae>Sphingobacterium
Hyphomicrobium denitrificans	S	53399	1656	0.02248	NA	NA	NA	NA	1656	0.02039	NA	NA	1648	0.02248	cellular&nbsp;organisms>Bacteria>Proteobacteria>Alphaproteobacteria>Hyphomicrobiales>Hyphomicrobiaceae>Hyphomicrobium
Comamonas thiooxydans	S	363952	4993	0.02248	NA	NA	4993	0.02248	NA	NA	NA	NA	NA	NA	cellular&nbsp;organisms>Bacteria>Proteobacteria>Betaproteobacteria>Burkholderiales>Comamonadaceae>Comamonas
Streptomyces ferrugineus	S	1413221	1709	0.02247	NA	NA	NA	NA	1709	0.02104	NA	NA	1647	0.02247	cellular&nbsp;organisms>Bacteria>Terrabacteria&nbsp;group>Actinobacteria>Actinomycetia>Streptomycetales>Streptomycetaceae>Streptomyces
Enterococcus rotai	S	118060	1986	0.02246	1141	0.007539	NA	NA	NA	NA	1986	0.02246	NA	NA	cellular&nbsp;organisms>Bacteria>Terrabacteria&nbsp;group>Firmicutes>Bacilli>Lactobacillales>Enterococcaceae>Enterococcus
Sphingomonas sp. NBWT7	S	2596913	1822	0.02243	NA	NA	NA	NA	1822	0.02243	NA	NA	NA	NA	cellular&nbsp;organisms>Bacteria>Proteobacteria>Alphaproteobacteria>Sphingomonadales>Sphingomonadaceae>Sphingomonas>unclassified&nbsp;Sphingomonas
Paenibacillus bovis	S	1616788	1983	0.02243	NA	NA	NA	NA	NA	NA	1983	0.02243	1202	0.0164	cellular&nbsp;organisms>Bacteria>Terrabacteria&nbsp;group>Firmicutes>Bacilli>Bacillales>Paenibacillaceae>Paenibacillus
Tepiditoga spiralis	S	2108365	1983	0.02243	NA	NA	NA	NA	1252	0.01542	1983	0.02243	1216	0.01659	cellular&nbsp;organisms>Bacteria>Thermotogae>Thermotogae>Petrotogales>Petrotogaceae>Tepiditoga
Chitinophaga caeni	S	2029983	1821	0.02242	NA	NA	NA	NA	1821	0.02242	1075	0.01216	1327	0.0181	cellular&nbsp;organisms>Bacteria>FCB&nbsp;group>Bacteroidetes/Chlorobi&nbsp;group>Bacteroidetes>Chitinophagia>Chitinophagales>Chitinophagaceae>Chitinophaga
Pedobacter sp. eg	S	2201271	2687	0.02242	2687	0.01775	2278	0.01026	1821	0.02242	1725	0.01951	1136	0.0155	cellular&nbsp;organisms>Bacteria>FCB&nbsp;group>Bacteroidetes/Chlorobi&nbsp;group>Bacteroidetes>Sphingobacteriia>Sphingobacteriales>Sphingobacteriaceae>Pedobacter>unclassified&nbsp;Pedobacter
Cyanobacterium aponinum	S	379064	1906	0.02242	NA	NA	NA	NA	1821	0.02242	1906	0.02156	1595	0.02176	cellular&nbsp;organisms>Bacteria>Terrabacteria&nbsp;group>Cyanobacteria/Melainabacteria&nbsp;group>Cyanobacteria>Oscillatoriophycideae>Chroococcales>Geminocystaceae>Cyanobacterium
Gracilibacillus sp. SCU50	S	2663022	1982	0.02242	1547	0.01022	NA	NA	1096	0.01349	1982	0.02242	1241	0.01693	cellular&nbsp;organisms>Bacteria>Terrabacteria&nbsp;group>Firmicutes>Bacilli>Bacillales>Bacillaceae>Gracilibacillus>unclassified&nbsp;Gracilibacillus
Geodermatophilus obscurus	S	1861	1641	0.02239	NA	NA	NA	NA	1341	0.01651	NA	NA	1641	0.02239	cellular&nbsp;organisms>Bacteria>Terrabacteria&nbsp;group>Actinobacteria>Actinomycetia>Geodermatophilales>Geodermatophilaceae>Geodermatophilus
[truncated: 1,069 more rows]

## Sheet: S3 Table
S3 Table. Metagenome Assembled Genome statistics. CheckM genome statistics for MAG catalogue following assembly of metagenomic reads from 5 horse faecal samples. For High and medium quality sequences, clusters at 95% and 99% ANI have been detailed.
[truncated: 154 more rows]

[truncated: 7 more sheets: S4 Table, S5 Table, S6 Table, S7 Table, S8 Table, S9 Table, S10 Table]
